# Supplementary material
Source: PubMed Central journal article supplement (PMC3179663)
Supplement: NIHMS313115-supplement-1.pdf [file NIHMS313115-supplement-1.pdf]

# Regioselective Reactions for Programmable Resveratrol Oligomer Synthesis

Scott A. Snyder,\* Andreas Gollner, and Maria I. Chiriac

Department of Chemistry, Columbia University

Havemeyer Hall – Mail Code 3129

3000 Broadway, New York, NY 10027 (USA)

## Supporting Information

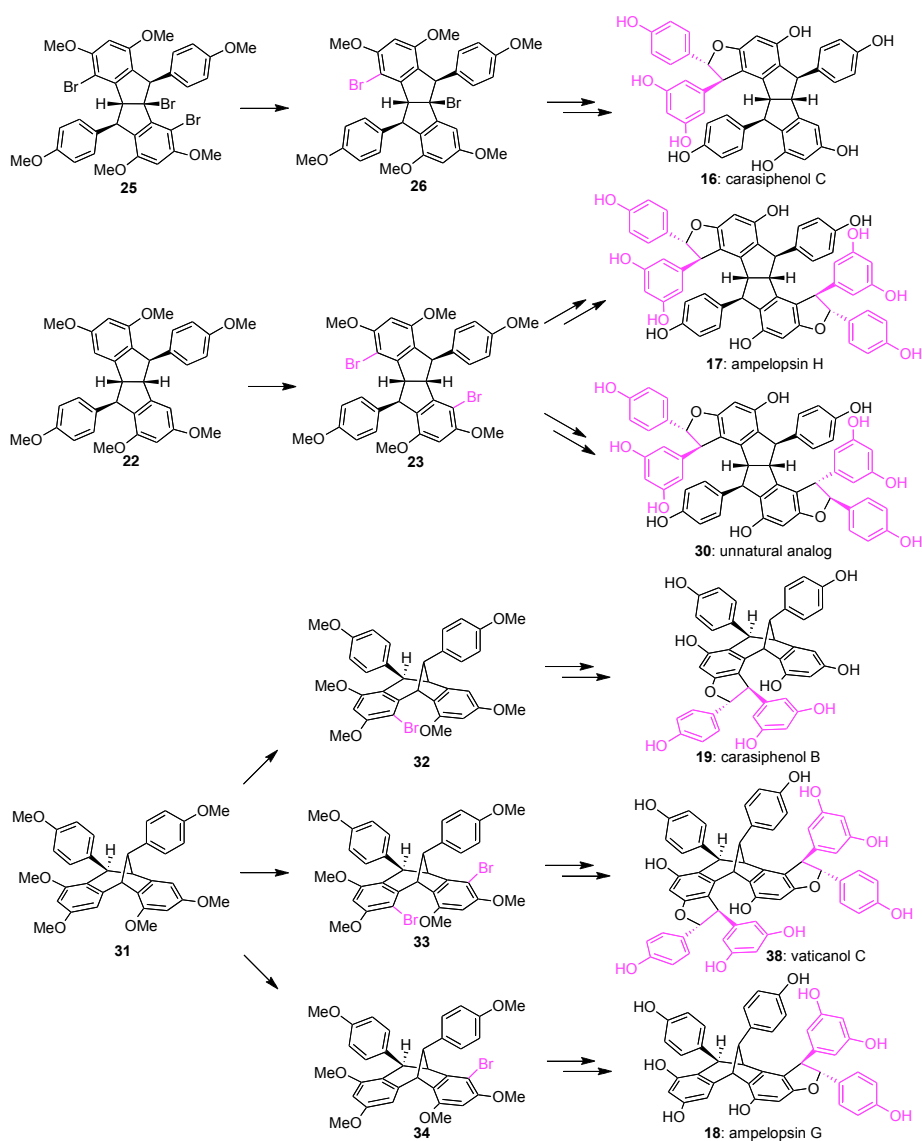

Figure S1. Overarching synthetic scheme for the preparation of 5 natural and 1 non-natural resveratrol oligomers.

## Table of Contents for Supplementary Information

|                                                                              |     |
|------------------------------------------------------------------------------|-----|
| General parameters                                                           | S3  |
| Synthesis of brominated pallidol starting materials                          | S4  |
| Total synthesis of carasiphenol C ( <b>16</b> )                              | S6  |
| Total synthesis of ampelopsin H ( <b>17</b> ) and unnatural analog <b>30</b> | S11 |
| Synthesis of brominated ampelopsin F starting materials                      | S16 |
| Total synthesis of carasiphenol B ( <b>19</b> )                              | S19 |
| Total synthesis of ampelopsin G ( <b>18</b> )                                | S22 |
| Total synthesis of vaticanol C ( <b>38</b> )                                 | S26 |
| Larger scale synthesis of carasiphenol C ( <b>16</b> )                       | S30 |
| Spectral comparison tables for natural products                              | S31 |
| References                                                                   | S36 |
| NMR spectra for all intermediates and final products                         | S37 |

## Experimental Data for Compounds

**General Procedures.** All reactions were carried out under an argon atmosphere with dry solvents under anhydrous conditions, unless otherwise noted. Dry tetrahydrofuran, toluene, benzene, diethyl ether and dichloromethane were obtained by passing commercially available pre-dried, oxygen-free formulations through activated alumina columns. Yields refer to chromatographically and spectroscopically ( $^1\text{H}$  and  $^{13}\text{C}$  NMR) homogeneous materials, unless otherwise stated. Reagents were purchased at the highest commercial quality and used without further purification, unless otherwise stated. Reactions were magnetically stirred and monitored by thin-layer chromatography (TLC) carried out on 0.25 mm E. Merck silica gel plates (60F-254) using UV light as visualizing agent, and an ethanolic solution of phosphomolybdic acid and cerium sulfate, and heat as developing agents. SiliCycle silica gel (60, academic grade, particle size 0.040–0.063 mm) was used for flash column chromatography. Preparative thin-layer chromatography separations were carried out on 0.50 mm E. Merck silica gel plates (60F-254). NMR spectra were recorded on Bruker 300, 400, 500, 600 and 800 MHz instruments and calibrated using residual undeuterated solvent as an internal reference. The following abbreviations were used to explain the multiplicities: s = singlet, d = doublet, t = triplet, br = broad, app = apparent. IR spectra were recorded on a Perkin-Elmer 1000 series FT-IR spectrometer. High-resolution mass spectra (HRMS) were recorded in the Columbia University Mass Spectral Core facility on a JOEL HX110 mass spectrometer using FAB (fast atom bombardment) and APCI (atmospheric pressure chemical ionization) techniques.

**Abbreviations.** NBS = *N*-bromosuccinimide, EtOAc = ethyl acetate, bpy = 2,2'-bipyridine, *i*-Pr<sub>2</sub>NEt = *N,N*-diisopropylethylamine, DMF = *N,N*-dimethylformamide, *n*-BuLi = *n*-butyllithium, *t*-BuLi = *tert*-butyllithium, DMP = Dess – Martin periodinane, BnBr = benzyl bromide, TBAI = tetrabutylammonium iodide, Me<sub>3</sub>SI = trimethylsulfonium iodide, KHMDS = potassium bis(trimethylsilyl)amide, MeOH = methanol, BDSB = bromodiethylsulfonium bromopentachloroantimonate, KO*t*-Bu = potassium *tert*-butoxide, DMSO = dimethylsulfoxide.

**Permethylated Pallidol (22).** Tribromide **25** (0.280 g, 0.361 mmol, 1.0 equiv; prepared according to published procedures<sup>1</sup>) was dissolved in THF (5 mL), degassed by argon sparging for 20 min, and cooled to –78 °C. Next, *t*-BuLi (1.7 M in THF, 1.2 mL, 2.04 mmol, 5.7 equiv) was added dropwise over the course of 5 min and the reaction was stirred at –78 °C for an additional 10 min. Upon completion, the reaction contents were quenched with saturated aqueous NH<sub>4</sub>Cl (10 mL) at –78 °C, warmed to 25 °C, poured into water (10 mL) extracted with EtOAc (3 × 15 mL). The combined organic layers were then dried (MgSO<sub>4</sub>), filtered, and concentrated. The resultant crude product was purified by flash column chromatography (silica gel, hexanes:EtOAc, 10:1→5:1) to afford permethylated pallidol (**22**, 0.193 g, 99% yield) as a colorless oil. **22**: *R*<sub>f</sub> = 0.55 (silica gel, hexanes:EtOAc, 1:1); IR (film)  $\nu_{\text{max}}$  2998, 2908, 2835, 1560, 1510, 1463, 1328, 1248, 1142, 1037, 829, 731 cm<sup>–1</sup>;  $^1\text{H}$  NMR (400 MHz, CDCl<sub>3</sub>)  $\delta$  7.06 (d, *J* = 8.8 Hz, 4 H), 6.80 (d, *J* = 8.4 Hz, 4 H), 6.69 (d, *J* = 1.6 Hz, 2 H), 6.26 (d, *J* = 1.6 Hz, 2 H), 4.61 (s, 2 H), 4.00 (s, 2 H), 3.86 (s, 6 H), 3.77 (s, 6 H), 3.61 (s, 6 H);  $^{13}\text{C}$  NMR (100 MHz, CDCl<sub>3</sub>)  $\delta$  161.2, 157.8, 156.9, 148.6, 137.9, 128.1, 124.8, 113.6, 100.1, 97.7, 59.6, 55.5, 55.2 (2 C), 53.4; HRMS (FAB) calcd for C<sub>34</sub>H<sub>34</sub>O<sub>6</sub><sup>+</sup> [*M*<sup>+</sup>] 538.6302, found 538.2354.

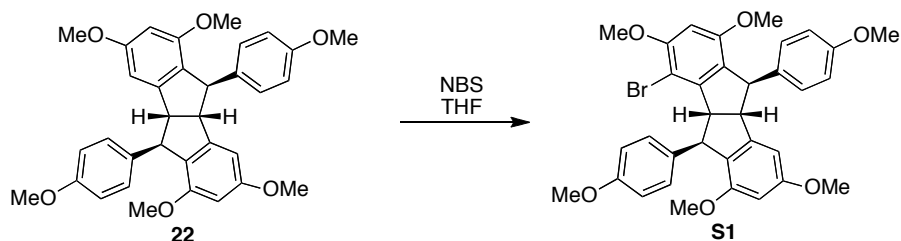

**Figure S2.** Synthesis of monobromide **S1** from intermediate **22**. Reagents and Conditions: NBS (1.0 equiv), THF,  $-78\text{ }^{\circ}\text{C}$ , 4 h,  $-78\text{ }^{\circ}\text{C}$  to  $25\text{ }^{\circ}\text{C}$ , 2 h, 47%.

**Monobromide S1.** Permethylated pallidol (**22**, 0.295 g, 0.564 mmol, 1.0 equiv) was dissolved in THF (10 mL), cooled to  $-78\text{ }^{\circ}\text{C}$ , and then NBS (0.100 g, 0.564 mmol, 1.0 equiv) was added in three portions over the course of 40 min at  $-78\text{ }^{\circ}\text{C}$ . The resultant solution was stirred at  $-78\text{ }^{\circ}\text{C}$  for an additional 4 h and then slowly warmed to  $25\text{ }^{\circ}\text{C}$  over the course of 2 h. Upon completion, the reaction contents were quenched with saturated aqueous  $\text{NaHCO}_3$  (15 mL), poured into water (10 mL), and extracted with EtOAc ( $3 \times 20\text{ mL}$ ). The combined organic layers were then dried ( $\text{MgSO}_4$ ), filtered, and concentrated. The resultant crude product was purified by flash column chromatography (silica gel, hexanes:EtOAc, 10:1 $\rightarrow$ 4:1) to afford monobromide **S1** (0.163 g, 47% yield, 62% based on recovered starting material) as a colorless oil, dibromide **23** (0.090 g, 23% yield, 30% based on recovered starting material) as a colorless oil, and starting material (**22**, 0.073 g, 24% yield) as a colorless oil. **S1**:  $R_f = 0.40$  (silica gel, hexanes:EtOAc, 2:1); IR (film)  $\nu_{\text{max}}$  2999, 2934, 2835, 1598, 1510, 1461, 1330, 1248, 1215, 1175, 1144, 1079, 1035,  $829\text{ cm}^{-1}$ ;  $^1\text{H}$  NMR (400 MHz,  $\text{CDCl}_3$ )  $\delta$  7.20 (d,  $J = 8.6\text{ Hz}$ , 2 H), 7.02 (d,  $J = 8.6\text{ Hz}$ , 2 H), 6.80 (d,  $J = 8.6\text{ Hz}$ , 2 H), 6.78 (d,  $J = 8.6\text{ Hz}$ , 2 H), 6.66 (s, 1 H), 6.31 (s, 1 H), 6.23 (s, 1 H), 5.03 (s, 1 H), 4.68 (s, 1 H), 4.16 (d,  $J = 6.8\text{ Hz}$ , 1 H), 4.09 (d,  $J = 6.8\text{ Hz}$ , 1 H), 3.88 (s, 3 H), 3.86 (s, 3 H), 3.77 (s, 3 H), 3.76 (s, 3 H), 3.63 (s, 3 H), 3.58 (s, 3 H);  $^{13}\text{C}$  NMR (100 MHz,  $\text{CDCl}_3$ )  $\delta$  161.2, 157.9, 157.7, 156.8, 156.8, 156.0, 147.9, 146.9, 138.4, 137.9, 128.5, 128.0, 127.2, 125.7, 113.7, 113.4, 100.1, 100.0, 97.7, 96.0, 61.5, 58.9, 56.7, 55.5, 55.2, 55.1, 54.7, 51.3; HRMS (FAB) calcd for  $\text{C}_{34}\text{H}_{33}\text{O}_6\text{Br}^+ [\text{M}^+]$  616.1461, found 616.1456 (for  $^{79}\text{Br}$ ).

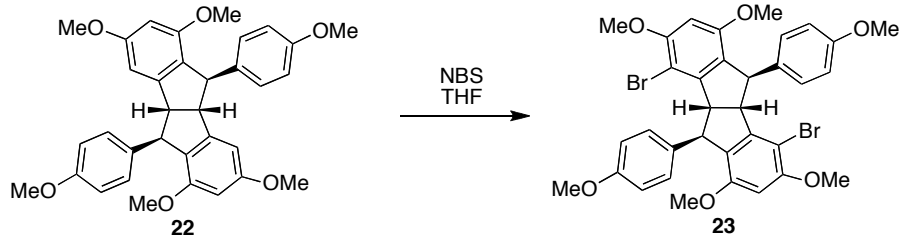

**Figure S3.** Synthesis of dibromide **23** from intermediate **22**. Reagents and Conditions: NBS (2.0 equiv), THF,  $-78\text{ }^{\circ}\text{C}$ , 2 h, 99%.

**Dibromide 23.** Permethylated pallidol (**22**, 0.123 g, 0.235 mmol, 1.0 equiv) was dissolved in THF (4 mL), cooled to  $-78\text{ }^{\circ}\text{C}$ , and then NBS (0.084 g, 0.471 mmol, 2.0 equiv) was added in a single portion. The resultant solution was stirred at  $-78\text{ }^{\circ}\text{C}$  for 2 h and then warmed up to  $25\text{ }^{\circ}\text{C}$  over 2 h. Upon completion, the reaction contents were quenched with saturated aqueous  $\text{NaHCO}_3$  (10 mL), poured into water (10 mL), and extracted with EtOAc ( $2 \times 10\text{ mL}$ ). The combined organic layers were then dried ( $\text{MgSO}_4$ ), filtered, and concentrated. The resultant crude product mixture was purified by flash column chromatography (silica gel, hexanes:EtOAc, 10:1 $\rightarrow$ 4:1) to afford dibromide **23** (0.163 g, 99% yield) as a white solid. **23**:  $R_f = 0.35$  (silica gel, hexanes:EtOAc, 2:1); IR (film)  $\nu_{\text{max}}$  2999, 2934, 2835, 1581, 1509, 1461, 1433, 1330, 1249,

1214, 1177, 1080, 1035, 822  $\text{cm}^{-1}$ ;  $^1\text{H}$  NMR (400 MHz,  $\text{CDCl}_3$ )  $\delta$  7.18 (d,  $J$  = 8.6 Hz, 4 H), 6.79 (d,  $J$  = 8.6 Hz, 4 H), 6.27 (s, 2 H), 5.01 (s, 2 H), 4.28 (s, 2 H), 3.87 (s, 6 H), 3.77 (s, 6 H), 3.59 (s, 6 H);  $^{13}\text{C}$  NMR (100 MHz,  $\text{CDCl}_3$ )  $\delta$  157.7, 156.7, 155.8, 146.4, 138.2, 128.5, 127.9, 113.4, 99.5, 96.0, 60.5, 56.7, 55.5, 55.1, 52.9; HRMS (FAB) calcd for  $\text{C}_{34}\text{H}_{32}\text{O}_6\text{Br}_2^+$  [ $\text{M}^+$ ] 694.0566, found 694.0569 (for  $^{79}\text{Br}$ ).

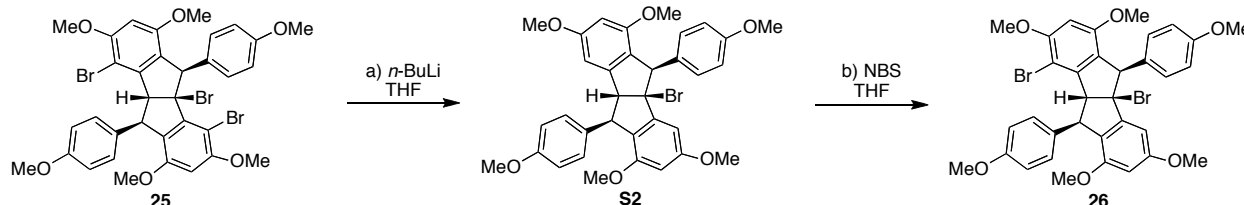

**Figure S4.** Synthesis of dibromide **26** from intermediate **25**. Reagents and Conditions: a)  $n\text{-BuLi}$  (1.6 M in THF, 2.1 equiv), THF,  $-78^\circ\text{C}$ , 20 min, 94%; b) NBS (1.0 equiv), THF,  $-78^\circ\text{C}$ , 4 h,  $-78^\circ\text{C}$  to  $25^\circ\text{C}$ , 2 h, 84%.

**Monoalkyl Bromide S2.** Tribromide **25** (1.00 g, 1.290 mmol, 1.0 equiv) was dissolved in THF (20 mL) and cooled to  $-78^\circ\text{C}$ . Next,  $n\text{-BuLi}$  (1.6 M in THF, 1.61 mL, 2.58 mmol, 2.0 equiv) was added dropwise over the course of 3 min and the reaction was stirred at  $-78^\circ\text{C}$  for an additional 5 min. Upon completion, the reaction contents were quenched with saturated aqueous  $\text{NH}_4\text{Cl}$  (15 mL) at  $-78^\circ\text{C}$ , warmed to  $25^\circ\text{C}$ , poured into water (50 mL), and extracted with  $\text{EtOAc}$  ( $3 \times 30$  mL). The combined organic layers were then dried ( $\text{MgSO}_4$ ), filtered, and concentrated. The resultant crude product was purified by flash column chromatography (silica gel, hexanes: $\text{EtOAc}$ , 12:1 $\rightarrow$ 5:1) to afford monoalkyl bromide **S2** (0.750 g, 94% yield) as a white solid. **S2**:  $R_f$  = 0.39 (silica gel, hexanes: $\text{EtOAc}$ , 2:1); IR (film)  $\nu_{\text{max}}$  2998, 2994, 2835, 1604, 1511, 1490, 1462, 1327, 1303, 1246, 1205, 1174, 1143, 1104, 1038, 831, 784  $\text{cm}^{-1}$ ;  $^1\text{H}$  NMR (400 MHz,  $55^\circ\text{C}$ ,  $\text{CDCl}_3$ )  $\delta$  7.25 (d,  $J$  = 8.8 Hz, 2 H), 7.00 (br s, 2 H), 6.89–6.77 (m, 5 H), 6.66 (s, 3 H), 6.35 (s, 1 H), 6.26 (s, 1 H), 4.88 (s, 1 H), 4.65 (s, 1 H), 4.29 (s, 1 H), 3.89 (s, 3 H), 3.88 (s, 3 H), 3.79 (s, 3 H), 3.78 (s, 3 H), 3.62 (s, 3 H), 3.54 (s, 3 H);  $^{13}\text{C}$  NMR (100 MHz,  $55^\circ\text{C}$ ,  $\text{CDCl}_3$ )  $\delta$  162.0, 161.7, 158.5, 158.2, 157.1, 156.6, 151.0, 146.6, 136.5, 135.5, 130.1, 129.1, 124.3, 123.4, 113.7, 113.2, 100.0, 99.9, 99.7, 98.5, 78.3, 69.0, 58.9, 55.7, 55.6, 55.4, 55.2, 55.1, 54.0; HRMS (FAB) calcd for  $\text{C}_{34}\text{H}_{33}\text{O}_6\text{Br}^+$  [ $\text{M}^+$ ] 616.1461, found 616.1475 (for  $^{79}\text{Br}$ ).

**Dibromide 26.** Monoalkyl bromide **S2** (0.700 g, 1.136 mmol, 1.0 equiv) was dissolved in THF (20 mL), cooled to  $-78^\circ\text{C}$ , and then NBS (0.202 g, 1.136 mmol, 1.0 equiv) in THF (2 mL) was added in a dropwise in 15 min. The resultant solution was stirred at  $-78^\circ\text{C}$  for 8 h and then was warmed to  $25^\circ\text{C}$  over the course of 4 h. Upon completion, the reaction contents were quenched with saturated aqueous  $\text{NaHCO}_3$  (20 mL), poured into water (80 mL), and extracted with  $\text{EtOAc}$  ( $3 \times 50$  mL). The combined organic layers were then dried ( $\text{MgSO}_4$ ), filtered, and concentrated. The resultant crude product was recrystallized from acetonitrile to give dibromide **26** (0.561 g, 71% yield) as white crystals. The mother liquor was purified by flash column chromatography (silica gel, hexanes: $\text{EtOAc}$ , 10:1 $\rightarrow$ 4:1) to afford additional **26** (0.102 g, 13%) as a white solid (combined 84% yield). **26**:  $R_f$  = 0.30 (silica gel, hexanes: $\text{EtOAc}$ , 2:1); IR (film)  $\nu_{\text{max}}$  3000, 2934, 2836, 1603, 1583, 1511, 1491, 1462, 1434, 1331, 1303, 1246, 1210, 1177, 1147, 1080, 1036, 829, 811, 784, 733  $\text{cm}^{-1}$ ;  $^1\text{H}$  NMR (400 MHz,  $55^\circ\text{C}$ ,  $\text{CDCl}_3$ )  $\delta$  7.51 (d,  $J$  = 8.7 Hz, 2 H), 6.94 (br s, 2 H), 6.83–6.75 (m, 5 H), 6.32–6.28 (m, 2 H), 5.01 (s, 1 H), 4.97 (s, 1 H), 4.47 (s, 1 H), 3.89 (s, 3 H), 3.88 (s, 3 H), 3.78 (br s, 6 H), 3.58 (s, 3 H), 3.55 (s, 3 H);  $^{13}\text{C}$  NMR (100 MHz,  $55^\circ\text{C}$ ,  $\text{CDCl}_3$ )  $\delta$  161.9, 158.6, 158.1, 157.4, 156.9, 155.7, 150.1, 145.5, 136.5, 136.0, 130.1, 129.8, 126.3, 124.5, 113.3, 113.2, 99.8 (2 C), 97.0, 77.8, 70.6, 60.3, 56.8, 55.8,

55.7, 55.4, 55.2 (2 C), 51.9; HRMS (FAB) calcd for  $C_{34}H_{32}O_6Br_2^+$  [ $M^+$ ] 694.0566, found 694.0579 (for  $^{79}Br$ ).

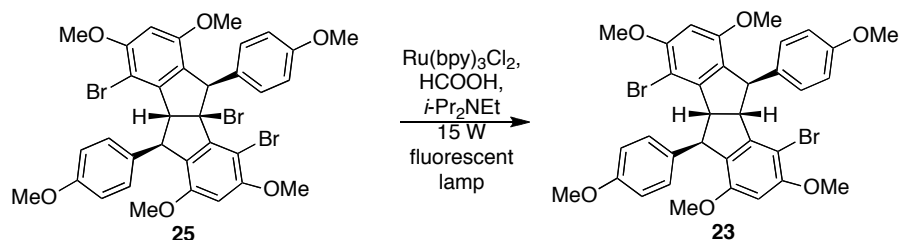

**Figure S5.** Alternate synthesis of dibromide **23** from intermediate **25**.  
Reagents and Conditions:  $Ru(bpy)_3Cl_2 \cdot 7H_2O$  (0.1 equiv),  $i-Pr_2NEt$  (20.0 equiv),  $HCOOH$  (20.0 equiv), DMF, degassed, 15 W fluorescent lamp, 25 °C, 14 h, 85%.

**Dibromide 23.** A round-bottomed flask was charged sequentially with  $Ru(bpy)_3Cl_2 \cdot 7H_2O$  (2.0 mg, 0.003 mmol, 0.1 equiv), tribromide **25** (0.020 g, 0.026 mmol, 1.0 equiv),  $i-Pr_2NEt$  (0.086 mL, 0.520 mmol, 20 equiv), and formic acid (0.020 mL, 0.520 mmol, 20 equiv). Finally, DMF (1.5 mL) was added at 25 °C and the resultant mixture was degassed by argon sparging for 20 min and placed at a distance of ~10 cm from a 15 W fluorescent lamp.<sup>2</sup> After turning the lamp on and stirring at 25 °C for 14 h, the reaction contents were poured into saturated aqueous  $NaHCO_3$  (10 mL) and extracted with EtOAc ( $3 \times 10$  mL). The combined organic layers were then dried ( $MgSO_4$ ), filtered, and concentrated. The resultant crude product mixture was purified by flash column chromatography (silica gel, hexanes:EtOAc, 10:1→4:1) to afford dibromide **23** (0.015 g, 85% yield) as a white solid.

#### Total Synthesis of Carasiphenol C (**16**).

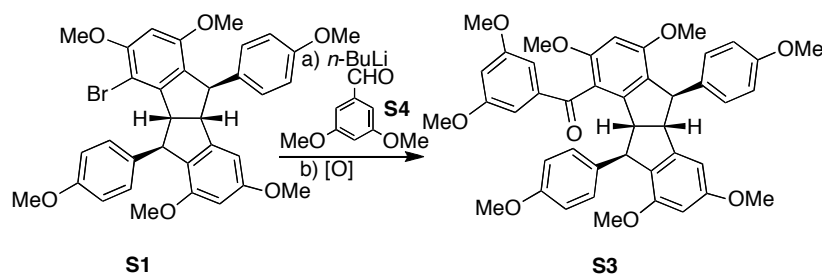

**Figure S6.** Synthesis of ketone **S3** starting from monobromide **S1**. Reagents and Conditions: a)  $n-BuLi$  (1.6 M in THF, 1.1 equiv), THF, -78 °C, 10 min, then **S4** (3.0 equiv), THF, -78 °C, 2 h, -78 °C to 25 °C, 1.5 h, 88%; b)  $NaHCO_3$  (10.0 equiv), DMP (1.4 equiv),  $CH_2Cl_2$ , 25 °C, 1 h, 99%.

**Ketone S3.** Monobromide **S1** (0.150 g, 0.243 mmol, 1.0 equiv) was azeotroped with benzene ( $3 \times 10$  mL), dissolved in THF (3 mL), and then cooled to -78 °C. Next,  $n-BuLi$  (1.6 M in THF, 0.267 mL, 0.267 mmol, 1.1 equiv) was added dropwise over the course of 5 min and the reaction mixture was stirred at -78 °C for an additional 10 min, ultimately yielding a solution with a slight yellow color. A solution of benzene-azeotroped ( $3 \times 5$  mL) 3,5-dimethoxybenzaldehyde (**S4**, 0.121 g, 0.729 mmol, 3.0 equiv) in THF (1.5 mL) was then added dropwise over 4 min at -78 °C. After stirring the resultant solution for an additional 2 h at -78 °C, the reaction was then allowed to slowly warm to 25 °C over the course of 1.5 h. Upon completion, the reaction contents were quenched with saturated aqueous  $NH_4Cl$  (5 mL), poured into water (20 mL), and extracted with EtOAc ( $3 \times 15$  mL). The combined organic layers were then dried ( $MgSO_4$ ), filtered, and concentrated. The resultant crude product mixture was purified by flash column chromatography (silica gel, hexanes:EtOAc, 4:1→1:1) to afford the

corresponding alcohol as a mixture of diastereomers (0.151 g, 88% yield) as a colorless oil. Pressing forward, this newly synthesized material (0.151 g, 0.214 mmol, 1.0 equiv) was dissolved in CH<sub>2</sub>Cl<sub>2</sub> (5 mL) and solid NaHCO<sub>3</sub> (0.180 g, 2.14 mmol, 10 equiv) and Dess–Martin periodinane (0.127 g, 0.300 mmol, 1.4 equiv) were added sequentially at 25 °C. The resultant mixture was stirred at 25 °C for 1 h. Upon completion, the reaction contents were quenched with saturated aqueous Na<sub>2</sub>SO<sub>3</sub> (10 mL) and the resultant slurry was stirred for an additional 20 min at 25 °C before being poured into water (15 mL) and extracted with EtOAc (3 × 10 mL). The combined organic layers were then washed with saturated aqueous NaHCO<sub>3</sub> (15 mL) and brine (15 mL), dried (MgSO<sub>4</sub>), filtered, and concentrated to afford ketone **S3** (0.150 g, 99% yield) as a colorless oil. **S3**: *R*<sub>f</sub> = 0.27 (silica gel, hexanes:EtOAc, 2:1); IR (film)  $\nu_{\text{max}}$  2999, 2935, 2836, 1662, 1593, 1510, 1462, 1426, 1325, 1300, 1249, 1204, 1155, 1033, 830 cm<sup>-1</sup>; <sup>1</sup>H NMR (400 MHz, CDCl<sub>3</sub>)  $\delta$  7.11 (d, *J* = 8.6 Hz, 2 H), 7.06 (d, *J* = 2.3 Hz, 2 H), 6.81 (d, *J* = 8.7 Hz, 2 H), 6.72 (d, *J* = 8.7 Hz, 2 H), 6.68 (t, *J* = 2.0 Hz, 1 H), 6.66 (d, *J* = 2.2 Hz, 1 H), 6.64 (d, *J* = 8.8 Hz, 2 H), 6.30 (s, 1 H), 6.23 (d, *J* = 1.9 Hz, 1 H), 4.63 (s, 1 H), 4.33 (s, 1 H), 4.16 (d, *J* = 6.3 Hz, 1 H), 3.94 (d, *J* = 6.4 Hz, 1 H), 3.86 (s, 3 H), 3.79 (s, 6 H), 3.77 (s, 3 H), 3.69 (s, 6 H), 3.66 (s, 3 H), 3.47 (s, 3 H); <sup>13</sup>C NMR (100 MHz, CDCl<sub>3</sub>)  $\delta$  196.9, 161.1, 157.9 (2 C), 157.5, 156.9, 148.4, 147.2, 141.2, 137.4, 137.1, 128.1, 127.9, 125.8, 124.8, 118.4, 113.7, 113.3, 106.9, 105.8, 100.1, 97.6, 94.4, 58.9, 58.8, 55.5, 55.3, 55.2, 55.0 (2 C), 52.9, 51.8; HRMS (FAB) calcd for C<sub>43</sub>H<sub>42</sub>O<sub>9</sub><sup>+</sup> [*M*<sup>+</sup>] 702.2829, found 702.2811.

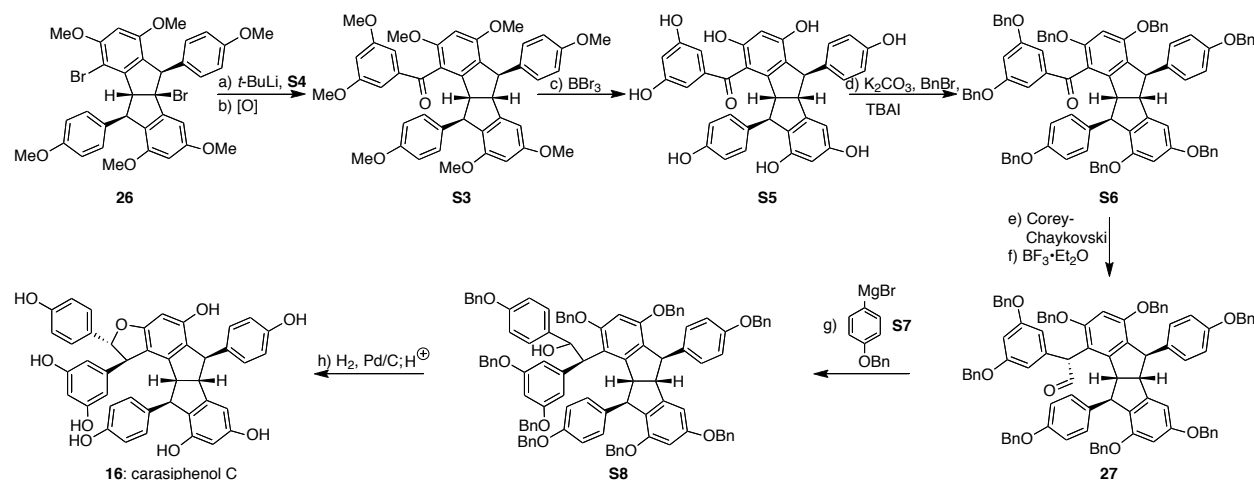

**Figure S7.** Total synthesis of carasiphenol C (**16**) from dibromide **26**. Reagents and Conditions: a) *t*-BuLi (1.7 M in THF, 3.0 equiv), THF, -78 °C, 4 min, then **S4** (3.0 equiv), THF, -78 °C, 1.5 h, 77%; b) NaHCO<sub>3</sub> (10.0 equiv), DMP (1.4 equiv), CH<sub>2</sub>Cl<sub>2</sub>, 25 °C, 1 h, 99%; c) BBr<sub>3</sub> (1.0 M in CH<sub>2</sub>Cl<sub>2</sub>, 35 equiv), CH<sub>2</sub>Cl<sub>2</sub>, sealed tube, 70 °C, 3 d, 86%; d) K<sub>2</sub>CO<sub>3</sub> (50.0 equiv), BnBr (50.0 equiv), *n*-Bu<sub>4</sub>Ni (2.0 equiv), acetone, 70 °C, 24 h, 85%; e) Me<sub>3</sub>Si (10.0 equiv), *n*-BuLi (1.6 M in THF, 8.0 equiv), THF, 0 °C, 2 min, then **S6**, 0 °C, 30 min; f) BF<sub>3</sub>·Et<sub>2</sub>O (3.0 equiv), THF, 0 °C, 30 min, 78% (over 2 steps); g) **S7** (1.0 M in THF, 5.0 equiv), THF, 25 °C, 45 min, 93%; h) H<sub>2</sub>, 30% Pd/C, EtOAc:MeOH (1:1) to MeOH, 25 °C, 12 h, then Amberlite IR-12OH, 25 °C, 1 h, 73% (over 2 steps).

**Ketone S3.** Dibromide **26** (0.550 g, 0.790 mmol, 1.0 equiv) was azeotroped with benzene (3 × 15 mL), dissolved in THF (10 mL), and then cooled to -78 °C. Next, *t*-BuLi (1.7 M in THF, 1.39 mL, 2.37 mmol, 3.0 equiv) was added dropwise over the course of 3 min and the reaction mixture was stirred at -78 °C for an additional 2 min, ultimately yielding a solution with a deeply yellow/orange color. A solution of benzene-azeotroped (2 × 10 mL) 3,5-dimethoxybenzaldehyde (**S4**, 0.151 g, 0.91 mmol, 1.15 equiv) in THF (2 mL) was then added dropwise over 3 min at -78 °C. After stirring the resultant solution for an additional 1.5 h at -78 °C, the bright yellow reaction contents were quenched with saturated aqueous NH<sub>4</sub>Cl (20 mL) at -78 °C, warmed to 25 °C, poured into water (50 mL) and extracted with EtOAc (3 × 50 mL). The combined organic layers were then dried (MgSO<sub>4</sub>), filtered, and concentrated. The resultant crude product mixture was purified by flash column chromatography (silica gel, hexanes:EtOAc,

4:1→1:1) to afford the desired alcohol product as a mixture of diastereomers (0.428 g, 77% yield) as a colorless oil. Pressing forward, the material (combined from two different batches) (0.650 g, 0.923 mmol, 1.0 equiv) was dissolved in CH<sub>2</sub>Cl<sub>2</sub> (15 mL), and solid NaHCO<sub>3</sub> (0.775 g, 9.23 mmol, 10 equiv) and Dess–Martin periodinane (0.545 g, 1.29 mmol, 1.4 equiv) were added sequentially at 25 °C. The resultant mixture was stirred at 25 °C for 1 h. Upon completion, the reaction contents were quenched with saturated aqueous Na<sub>2</sub>SO<sub>3</sub> (20 mL) and the resultant slurry was stirred for an additional 20 min at 25 °C before being poured into water (50 mL) and extracted with EtOAc (3 × 25 mL). The combined organic layers were then washed with saturated aqueous NaHCO<sub>3</sub> (5 mL) and brine (5 mL), dried (MgSO<sub>4</sub>), filtered, and concentrated afford ketone **S3** (0.642 g, 99% yield) as a colorless oil.

**Deprotected Ketone S5.** Permethylated ketone **S3** (0.123 g, 0.175 mmol, 1.0 equiv) was dissolved in a minimum amount of CH<sub>2</sub>Cl<sub>2</sub> (1 mL), transferred to a sealable reaction vessel, and then BBr<sub>3</sub> (1.0 M in CH<sub>2</sub>Cl<sub>2</sub>, 6.13 mL, 6.13 mmol, 35 equiv) was added quickly in a single portion at 25 °C. The resulting black reaction mixture was then heated at 70 °C for 3 d. Upon completion, the reaction contents were cooled to 25 °C and quenched with the addition of water (5 mL). After stirring the resultant biphasic mixture for an additional 10 min at 25 °C, the reaction contents were poured into water (15 mL), extracted with EtOAc (5 × 10 mL), dried (MgSO<sub>4</sub>), filtered, and concentrated. The resultant dark orange oil was purified by flash column chromatography (silica gel, CH<sub>2</sub>Cl<sub>2</sub>:MeOH, 10:1→3:1) to afford the deprotected ketone **S5** (0.089 g, 86% yield) as an orange oil. **S5** *R<sub>f</sub>* = 0.30 (silica gel, CH<sub>2</sub>Cl<sub>2</sub>:MeOH, 3:1); IR (film)  $\nu_{\text{max}}$  3291, 2917, 2849, 1697, 1511, 1445, 1342, 1239, 1168, 1105, 1005, 831 cm<sup>-1</sup>; <sup>1</sup>H NMR (400 MHz, acetone-*d*<sub>6</sub>)  $\delta$  9.33 (br s, 1 H), 8.63 (br s, 1 H), 8.44 (br s, 2 H), 8.09 (br s, 1 H), 8.03 (br s, 1 H), 7.86 (br s, 1 H), 7.74 (br s, 1 H), 7.09 (d, *J* = 8.2 Hz, 2 H), 6.93 (d, *J* = 1.5 Hz, 2 H), 6.77 (d, *J* = 8.2 Hz, 2 H), 6.65 (d, *J* = 8.4 Hz, 2 H), 6.61 (s, 1 H), 6.53 (d, *J* = 8.4 Hz, 2 H), 6.50 (s, 1 H), 6.32 (s, 1 H), 6.15 (s, 1 H), 4.62 (s, 1 H), 4.27 (s, 1 H), 4.18 (d, *J* = 6.2 Hz, 1 H), 3.80 (d, *J* = 6.1 Hz, 1 H); <sup>13</sup>C NMR (100 MHz, acetone-*d*<sub>6</sub>)  $\delta$  197.7, 159.2, 158.5, 158.3, 157.1, 155.6, 155.1, 154.2, 149.0, 148.9, 141.4, 136.4, 136.1, 128.2, 124.6, 122.6, 115.1, 114.7, 114.3, 108.4, 106.8, 102.2, 101.8, 101.7, 59.7, 59.0, 52.6, 52.4; HRMS (FAB) calcd for C<sub>35</sub>H<sub>26</sub>O<sub>9</sub><sup>+</sup> [*M*<sup>+</sup>] 590.1577, found 590.1575.

**Perbenzylated Ketone S6.** Solid K<sub>2</sub>CO<sub>3</sub> (1.04 g, 7.54 mmol, 50 equiv), BnBr (1.29 g, 7.54 mmol, 50 equiv) and *n*-Bu<sub>4</sub>NI (0.111 g, 0.301 mmol, 2.0 equiv) were added sequentially to a solution of deprotected ketone **S5** (0.089 g, 0.151 mmol, 1.0 equiv) in dry acetone (1 mL) at 25 °C. The resultant reaction mixture was then heated at 70 °C for 24 h. Upon completion, the reaction contents were cooled to 25 °C, quenched with the addition of water (10 mL), and extracted with EtOAc (3 × 10 mL). The combined organic layers were dried (MgSO<sub>4</sub>), filtered, and concentrated. The resultant crude product was purified by flash column chromatography (silica gel, hexanes:EtOAc, 20:1→5:1) to afford perbenzylated ketone **S6** (0.168 g, 85% yield) as a yellow oil. **S6**: *R<sub>f</sub>* = 0.45 (silica gel, hexanes:EtOAc, 3:1); IR (film)  $\nu_{\text{max}}$  3062, 3031, 2917, 1662, 1594, 1508, 1453, 1377, 1322, 1242, 1176, 1151, 1109, 1063, 1026, 736, 696 cm<sup>-1</sup>; <sup>1</sup>H NMR (400 MHz, CDCl<sub>3</sub>)  $\delta$  7.47–7.42 (m, 4 H), 7.41–7.36 (m, 7 H), 7.34–7.28 (m, 14 H), 7.26–7.24 (m, 2 H), 7.19–7.09 (m, 11 H), 7.04–7.00 (m, 2 H), 6.93–6.90 (m, 2 H), 6.89 (d, *J* = 8.6 Hz, 2 H), 6.86–6.82 (m, 2 H), 6.78 (d, *J* = 8.8 Hz, 2 H), 6.76 (d, *J* = 1.7 Hz, 1H), 6.74–6.70 (m, 3 H), 6.33 (d, *J* = 1.7 Hz, 1 H), 6.29 (s, 1 H), 5.07–5.01 (m, 4 H), 4.97–4.87 (m, 8 H), 4.86 (d, *J* = 11.9 Hz, 1 H), 4.80 (d, *J* = 11.9 Hz, 1 H), 4.73–4.69 (m, 2 H), 4.64 (s, 1 H), 4.48 (s, 1 H), 4.38 (d, *J* = 7.0 Hz, 1 H), 4.09 (d, *J* = 7.0 Hz, 1 H); <sup>13</sup>C NMR (100 MHz, CDCl<sub>3</sub>)  $\delta$  197.1, 160.4, 160.0, 157.9, 157.3, 157.0, 156.8, 155.6, 148.6, 147.8, 142.0, 138.0, 137.7, 137.4, 137.2, 137.0, 136.9,

136.7, 136.6, 136.5, 128.6, 128.5, 128.4, 128.3, 128.1, 128.0 (2 C), 127.9, 127.8 (2 C), 127.6 (2 C), 127.5 (2 C), 127.2, 127.1, 126.9, 126.8, 126.3, 126.0, 118.9, 114.7, 114.3, 108.1, 107.1, 101.7, 99.7, 97.2, 70.7, 70.4, 70.2, 70.1, 69.9, 69.7, 69.1, 59.0, 58.8, 53.8, 53.0; MS (FAB) calcd for  $C_{91}H_{74}O_9^+$  [ $M^+$ ] 1310.5, found 1310.8.

**Aldehyde 27.** To a slurry of  $Me_3Si$  (0.134 g, 0.656 mmol, 10 equiv) in THF (4 mL) at 0 °C was added *n*-BuLi (1.6 M in THF, 0.328 mL, 0.525 mmol, 8.0 equiv) dropwise over a period of 2 min, and the reaction mixture was stirred at 0 °C for an additional 2 min.<sup>3</sup> A solution of ketone **S6** (0.086 g, 0.066 mmol, 1.0 equiv) in THF (1 mL) was then added dropwise over the course of 2 min at 0 °C, and the resultant solution was stirred for an additional 30 min at 0 °C. Upon completion, the reaction contents were quenched at 0 °C with the addition of saturated aqueous  $NH_4Cl$  (10 mL), poured into water (10 mL), and extracted with EtOAc (3 × 10 mL). The combined organic layers were dried ( $MgSO_4$ ), and concentrated to give the crude epoxide as light yellow oil. Next, the crude epoxide was immediately dissolved in THF (3 mL), cooled to 0 °C, and  $BF_3 \cdot Et_2O$  (0.028 g, 0.198 mmol, 3.0 equiv) in THF (0.5 mL) was added dropwise over a period of 3 min. The resultant reaction mixture was stirred at 0 °C for 30 min. Upon completion, the reaction contents were quenched with saturated aqueous  $NaHCO_3$  (5 mL) and extracted with EtOAc (3 × 5 mL). The combined organic layers were then dried ( $MgSO_4$ ), filtered, and concentrated. The resultant crude product was purified by flash column chromatography (silica gel, hexanes:EtOAc, 15:1→5:1) to afford aldehyde **27** (0.068 g, 78% yield) as a mixture of diastereomers (5.5:1.0 as determined by  $^1H$  NMR). The stereoisomers could not be separated at this stage by flash column chromatography. An analytical sample of aldehyde **27** was obtained by reverse-phase HPLC (Shimadzu Epic C18, 5 $\mu$ , 250 × 9.6 mm, retention time = 42 min, 5%  $H_2O$  in MeCN). **27**:  $R_f$  = 0.40 (silica gel, hexanes:EtOAc, 3:1); IR (film)  $\nu_{max}$  3031, 2920, 1716, 1597, 1507, 1453, 1377, 1323, 1240, 1146, 1026, 826, 734, 696  $cm^{-1}$ ;  $^1H$  NMR (400 MHz,  $CDCl_3$ )  $\delta$  10.00 (s, 1 H), 7.46–7.35 (m, 9 H), 7.34–7.26 (m, 18 H), 7.25–7.16 (m, 11 H), 6.98–6.93 (m, 4 H), 6.92–6.89 (m, 2 H), 6.87 (d,  $J$  = 6.6 Hz, 2 H), 6.85 (d,  $J$  = 6.8 Hz, 2 H), 6.60 (d,  $J$  = 1.4 Hz, 1 H), 6.46 (t,  $J$  = 2.2 Hz, 1 H), 6.37 (s, 1 H), 6.32 (d,  $J$  = 1.6 Hz, 1 H), 6.16 (d,  $J$  = 2.0 Hz, 2 H), 5.02 (s, 2 H), 5.00 (s, 2 H), 4.93 (d,  $J$  = 11.7 Hz, 1 H), 4.91–4.85 (m, 4 H), 4.83 (d,  $J$  = 11.9 Hz, 1 H), 4.83–4.73 (m, 5 H), 4.70 (d,  $J$  = 11.4 Hz, 2 H), 4.62 (d,  $J$  = 2.6 Hz, 1 H), 4.50 (d,  $J$  = 2.6 Hz, 1 H), 4.22 (dd,  $J$  = 8.1, 2.8 Hz, 1 H), 4.17 (dd,  $J$  = 8.1, 2.7 Hz, 1 H);  $^{13}C$  NMR (100 MHz,  $CDCl_3$ )  $\delta$  201.0, 160.4, 159.9, 157.3, 157.2, 157.1, 155.7, 155.3, 149.3, 148.1, 140.0, 139.3, 139.2, 137.2, 137.1, 137.0, 136.8, 136.7 (2 C), 136.4, 129.2, 128.6, 128.5 (2 C), 128.3, 128.2, 127.9, 127.7, 127.6, 127.5, 127.4, 127.1, 127.0, 126.8, 126.4, 116.0, 114.7, 114.6, 107.6, 101.3, 101.1, 99.4, 97.5, 71.1, 70.3, 70.0, 69.9 (2 C), 69.6, 69.4, 60.5, 59.8, 58.4, 56.3, 56.2; MS (FAB) calcd for  $C_{92}H_{76}O_9^+$  [ $M+H^+$ ] 1325.5, found 1325.9.

**Alcohol S8.** To a solution of aldehyde **27** (0.022 g, 0.014 mmol, 1.0 equiv, 5.5:1 mixture of diastereomers) in THF (1 mL) at 25 °C was added 4-benzyloxyphenylmagnesium bromide (**S7**, 1.0 M in THF, 0.072 mL, 0.072 mmol, 5.0 equiv), and the resultant reaction mixture was stirred for 45 min at 25 °C. Upon completion, the reaction contents were quenched with saturated aqueous  $NH_4Cl$  (4 mL), poured into water (4 mL), and extracted with EtOAc (3 × 3 mL). The combined organic layers were dried ( $MgSO_4$ ), filtered, and concentrated. The resultant crude product was purified by flash column chromatography (silica gel, hexanes:EtOAc, 10:1→1:1) to afford alcohol **S8** (0.017 g, 93% yield, mixture of diastereomers, 4:1 based on  $^1H$  NMR, separable from the diastereomers resulting from the minor aldehyde stereoisomer) as a white solid. An analytical sample of the major diastereomer was obtained by preparative thin layer chromatography (hexanes:EtOAc, 1:1). **S8**:  $R_f$  = 0.40 (silica gel,

hexanes:EtOAc, 3:1); IR (film)  $\nu_{\max}$  3062, 3030, 2917, 1596, 1508, 1454, 1378, 1312, 1242, 1146, 1066, 1027, 828, 736, 696  $\text{cm}^{-1}$ ;  $^1\text{H}$  NMR (400 MHz,  $\text{CDCl}_3$ )  $\delta$  7.50–7.21 (m, 30 H), 7.12–7.19 (m, 10 H), 7.18–7.11 (m, 5 H), 7.01 (d,  $J$  = 8.6 Hz, 2 H), 7.98–7.95 (m, 2 H), 6.84 (d,  $J$  = 8.8 Hz, 2 H), 6.80 (d,  $J$  = 8.9 Hz, 2 H), 6.73 (d,  $J$  = 8.8 Hz, 2 H), 6.69 (d,  $J$  = 8.8 Hz, 2 H), 6.49 (s, 1 H), 6.34 (s, 1 H), 6.30 (t,  $J$  = 2.2 Hz, 1 H), 6.02 (d,  $J$  = 2.2 Hz, 2 H), 5.78 (dd,  $J$  = 10.2, 2.1 Hz, 1 H), 5.14 (d,  $J$  = 11.4 Hz, 1 H), 5.07 (d,  $J$  = 11.4 Hz, 1 H), 5.05–5.02 (m, 2 H), 4.99–4.95 (m, 4 H), 4.88 (d,  $J$  = 11.6 Hz, 1 H), 4.83 (d,  $J$  = 10.6 Hz, 2 H), 4.78 (d,  $J$  = 11.5 Hz, 1 H), 4.71 (s, 2 H), 4.59 (d,  $J$  = 10.4 Hz, 1 H), 4.57 (s, 1 H), 4.49 (s, 4 H), 4.22 (d,  $J$  = 7.9 Hz, 1 H), 4.13 (d,  $J$  = 7.9 Hz, 1 H), 2.84 (d,  $J$  = 2.6 Hz, 1 H);  $^{13}\text{C}$  NMR (100 MHz,  $\text{CDCl}_3$ )  $\delta$  159.1, 158.0, 157.9, 157.1, 157.0, 155.6, 154.6, 149.2, 147.9, 144.1, 139.2, 138.7, 137.3, 137.1, 137.0, 136.9, 136.5, 135.5, 129.4, 128.8, 128.6, 128.5 (4 C), 128.4 (2 C), 128.3 (3 C), 127.9 (3 C), 127.8, 127.7 (2 C), 127.6 (2 C), 127.4 (2 C), 127.1, 126.9, 114.6, 114.1, 113.8, 108.0, 101.3, 101.0, 99.3, 98.0, 75.2, 71.5, 70.4, 70.0 (2 C), 69.7, 69.5, 59.8, 59.3, 56.9, 55.5, 54.8; MS (FAB) calcd for  $\text{C}_{105}\text{H}_{88}\text{O}_{10}^+ [\text{M}^+]$  1508.6, found 1508.7.

**Carasiphenol C (16).** Alcohol **S8** (9.0 mg, 0.006 mmol, 1.0 equiv) was dissolved in a mixture of EtOAc:MeOH (1:1, 3 mL) and solid Pd/C (30%, 6.0 mg) was added.  $\text{H}_2$  was then bubbled directly through the stirred reaction mixture for 30 min.<sup>4</sup> Once complete, some additional MeOH was added to replace any evaporated solvent to rereach ~3 mL reaction volume and the reaction mixture was stirred under  $\text{H}_2$  (balloon) for 2 h.  $\text{H}_2$  was bubbled through the stirred reaction mixture again for 30 min and the reaction mixture again was refilled with MeOH to account for lost solvent. The reaction was then stirred under  $\text{H}_2$  for 12 h.<sup>5</sup> Upon completion, the reaction solution was filtered through simple filtration paper to remove Pd/C and washed with MeOH (2 mL).<sup>6</sup> Next, Amberlite (IR-12OH, 0.100 g, pre-washed with MeOH five times) was added to the filtrate and the resultant mixture was stirred at 25 °C for 1 h. When this operation was complete, the solution was filtered through simple filtration paper to remove the Amberlite, and the filtrate was concentrated directly to afford carasiphenol C (**16**, 3.0 mg, 73%) as a white solid, with a scrupulously pure analytical sample obtained by reverse-phase HPLC<sup>7</sup> (Shimadzu Epic C18, 5 $\mu$ , 250  $\times$  9.6 mm, retention time = 11.7 min, 45% MeOH in  $\text{H}_2\text{O}$ ). **16**:  $R_f$  = 0.45 (silica gel,  $\text{CH}_2\text{Cl}_2$ :MeOH, 3:1); IR (film)  $\nu_{\max}$  3343, 2924, 2853, 1659, 1600, 1511, 1461, 1342, 1259, 1160, 1087, 1027, 834  $\text{cm}^{-1}$ ;  $^1\text{H}$  NMR (600 MHz, acetone- $d_6$ )  $\delta$  8.45 (s, 1 H), 8.18 (s, 2 H), 8.05 (s, 1 H), 8.01 (s, 2 H), 7.80 (s, 1 H), 7.70 (s, 1 H), 7.23 (d,  $J$  = 8.5 Hz, 2 H), 6.98 (d,  $J$  = 8.6 Hz, 2 H), 6.85 (d,  $J$  = 8.6 Hz, 2 H), 6.70 (d,  $J$  = 8.6 Hz, 2 H), 6.61 (d,  $J$  = 1.8 Hz, 1 H), 6.43 (d,  $J$  = 8.6, 2 H), 6.35 (d,  $J$  = 8.6 Hz, 2 H), 6.30 (t,  $J$  = 2.2 Hz, 1 H), 6.25 (d,  $J$  = 2.2 Hz, 2 H), 6.24 (s, 1 H), 6.16 (d,  $J$  = 1.8 Hz, 1 H), 5.26 (d,  $J$  = 7.5 Hz, 1 H), 4.83 (d,  $J$  = 7.5 Hz, 1 H), 4.62 (s, 1 H), 4.53 (s, 1 H), 3.67 (d,  $J$  = 5.9 Hz, 1 H), 3.62 (d,  $J$  = 5.9 Hz, 1 H);  $^{13}\text{C}$  NMR (150 MHz, acetone- $d_6$ )  $\delta$  162.9, 160.2, 159.4, 158.4, 157.7, 156.4, 156.1, 155.5, 150.9, 145.5, 145.1, 137.7, 136.7, 133.4, 130.6 (2 C), 129.2 (2 C), 128.8, 125.8, 123.0, 116.4, 116.2, 116.0, 115.4, 107.6, 103.5, 102.6, 102.4, 96.9, 94.8, 60.1, 59.9, 57.2, 53.4, 50.0; HRMS (FAB) calcd for  $\text{C}_{42}\text{H}_{42}\text{O}_9^+ [\text{M}^+]$  680.2046, found 680.2028. All spectroscopic data for **16** match that reported by Hu and co-workers. For a direct comparison, see Table S1. For a larger scale synthesis of this natural product, see end of this section before the physical NMR spectra.

## Total Synthesis of Ampelopsin H (17) and Unnatural Analog 30.

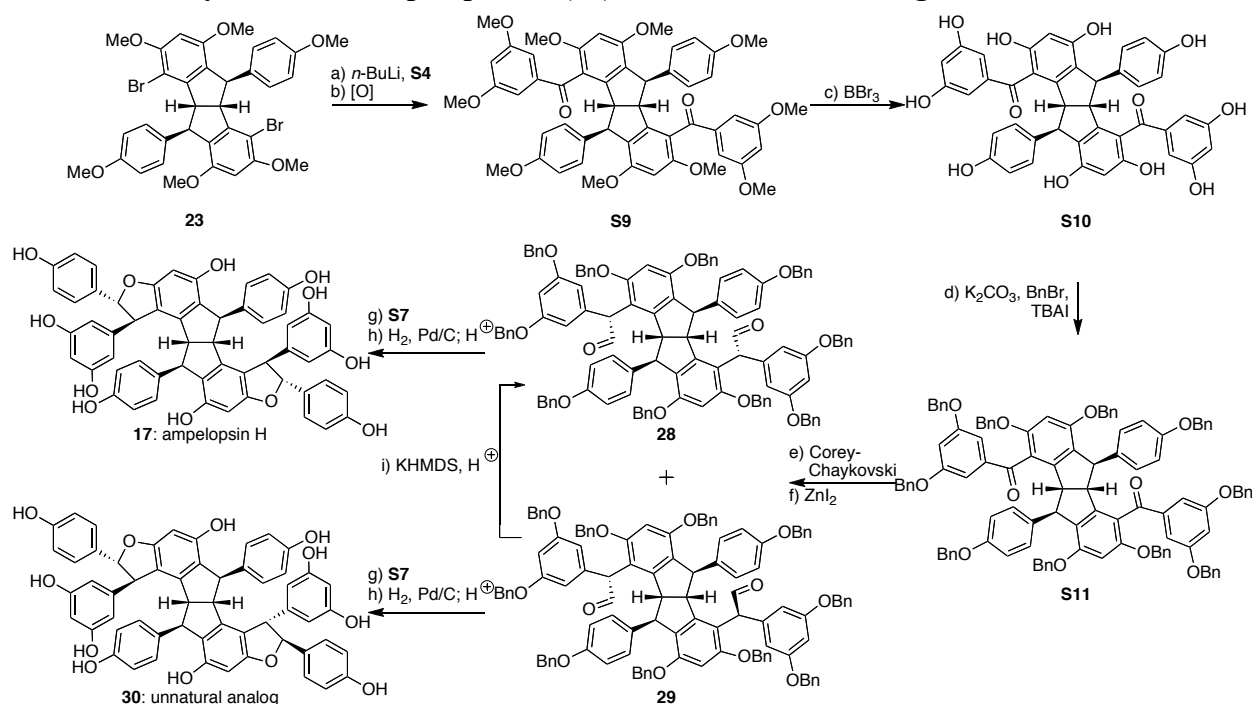

**Figure S8.** Total syntheses of ampelopsin H (17) and unnatural analog 30 from dibromide 23. Reagents and Conditions: a) *n*-BuLi (1.6 M in THF, 2.2 equiv), THF, -78 °C, 10 min, then S4 (6.0 equiv), THF, -78 °C, 2 h, -78 °C to 25 °C, 1.5 h, 87%; b) NaHCO<sub>3</sub> (10.0 equiv), DMP (2.8 equiv), CH<sub>2</sub>Cl<sub>2</sub>, 25 °C, 1 h, 99%; c) BBr<sub>3</sub> (1.0 M in CH<sub>2</sub>Cl<sub>2</sub>, 45 equiv), CH<sub>2</sub>Cl<sub>2</sub>, sealed tube, 70 °C, 3.5 d, 94%; d) K<sub>2</sub>CO<sub>3</sub> (50.0 equiv), BnBr (50.0 equiv), *n*-Bu<sub>4</sub>NI (2.0 equiv), acetone, 70 °C, 24 h, 87%; e) Me<sub>3</sub>Si (15.0 equiv), *n*-BuLi (1.6 M in THF, 12.0 equiv), THF, 0 °C, 4 min, then S11, 0 °C, 30 min; f) ZnI<sub>2</sub> (6.0 equiv), benzene, 25 °C, 20 min, 77% (over 2 steps); g) S7 (1.0 M in THF, 8.0 equiv), THF, 25 °C, 45 min, 86% (from 28) and 78% (from 29); h) H<sub>2</sub>, 30% Pd/C, EtOAc:MeOH (1:1) to MeOH, 25 °C, 12 h, then Amberlite IR-120H, 25 °C, 1 h, 71% (from 28) and 65% (from 29) over 2 steps; i) KHMDS (1.0 M in THF, 1.1 equiv), -78 °C, 10 min, 61%.

**Ketone S9.** Dibromide 23 (0.110 g, 0.156 mmol, 1.0 equiv) was azeotroped with benzene (3 × 5 mL), dissolved in THF (5 mL), and then cooled to -78 °C. Next, *n*-BuLi (1.6 M in THF, 0.217 mL, 0.348 mmol, 2.2 equiv) was added dropwise over the course of 5 min and the reaction mixture was stirred at -78 °C for an additional 10 min, ultimately yielding a solution with a slight yellow color. A solution of benzene-azeotroped (3 × 3 mL) 3,5-dimethoxybenzaldehyde (S4, 0.156 g, 0.936 mmol, 6.0 equiv) in THF (2 mL) was then added dropwise over 5 min at -78 °C. After stirring the resultant solution for an additional 2 h at -78 °C, the reaction was then allowed to slowly warm to 25 °C over the course of 1.5 h. Upon completion, the reaction contents were quenched with saturated aqueous NH<sub>4</sub>Cl (10 mL), poured into water (10 mL), and extracted with EtOAc (4 × 10 mL). The combined organic layers were then dried (MgSO<sub>4</sub>), filtered, and concentrated. The resultant crude product was purified by flash column chromatography (silica gel, hexanes:EtOAc, 4:1→1:1) to afford the desired alcohol as a mixture of diastereomers (0.118 g, 87% yield) as a colorless oil. Pressing forward, the mixture of alcohol diastereomers (0.118 g, 0.136 mmol, 1.0 equiv) was dissolved in CH<sub>2</sub>Cl<sub>2</sub> (5 mL) and solid NaHCO<sub>3</sub> (0.113 g, 1.36 mmol, 10 equiv) and Dess–Martin periodinane (0.161 g, 0.379 mmol, 2.8 equiv) were added sequentially at 25 °C. The resultant mixture was stirred at 25 °C for 1 h. Upon completion, the reaction contents were quenched with saturated aqueous Na<sub>2</sub>SO<sub>3</sub> (3 mL) and the resultant slurry was stirred for an additional 20 min before being poured into water (5 mL) and extracted with EtOAc (3 × 10 mL). The combined organic layers were then washed with saturated aqueous NaHCO<sub>3</sub> (10 mL) and brine (10 mL), dried (MgSO<sub>4</sub>),

filtered, and concentrated to afford ketone **S9** (0.117 g, 99% yield) as a colorless oil. **S9**:  $R_f$  = 0.23 (silica gel, hexanes:EtOAc, 2:1); IR (film)  $\nu_{\max}$  3000, 2935, 2836, 1664, 1592, 1510, 1459, 1426, 1324, 1300, 1250, 1204, 1155, 1081, 829  $\text{cm}^{-1}$ ;  $^1\text{H}$  NMR (400 MHz,  $\text{CDCl}_3$ )  $\delta$  7.07 (d,  $J$  = 2.4 Hz, 4 H), 6.73 (d,  $J$  = 8.6 Hz, 4 H), 6.66 (t,  $J$  = 2.4 Hz, 2 H), 6.64 (d,  $J$  = 8.6 Hz, 4 H), 6.27 (s, 2 H), 4.36 (s, 2 H), 4.05 (s, 2 H), 3.80 (s, 12 H), 3.70 (s, 6 H), 3.66 (s, 6 H), 3.56 (s, 6 H);  $^{13}\text{C}$  NMR (100 MHz,  $\text{CDCl}_3$ )  $\delta$  196.8, 160.7, 158.8, 157.8, 157.6, 146.8, 141.0, 136.7, 125.6, 118.0, 113.3, 107.0, 105.8, 94.5, 58.3, 56.1, 55.5, 55.1, 55.0, 51.4; HRMS (FAB) calcd for  $\text{C}_{52}\text{H}_{50}\text{O}_{12}^+$  [ $\text{M}^+$ ] 866.3302, found 866.3306.

**Deprotected Ketone S10.** Permethylated ketone **S9** (0.095 g, 0.110 mmol, 1.0 equiv) was dissolved in a minimal amount of  $\text{CH}_2\text{Cl}_2$  (1 mL), transferred to a sealable reaction vessel, and  $\text{BBr}_3$  (1.0 M in  $\text{CH}_2\text{Cl}_2$ , 4.93 mL, 4.93 mmol, 45 equiv) was added quickly in a single portion. The resulting black reaction mixture was then heated at 70 °C for 3.5 d. Upon completion, the reaction contents were cooled to 25 °C, quenched with water (15 mL), and extracted with EtOAc ( $5 \times 10$  mL). The resultant crude product was purified by flash column chromatography (silica gel,  $\text{CH}_2\text{Cl}_2$ :MeOH, 10:1→3:1) to afford the desired deprotected ketone **S10** (0.075 g, 94% yield) as an orange oil. **S10**:  $R_f$  = 0.25 (silica gel,  $\text{CH}_2\text{Cl}_2$ :MeOH, 3:1); IR (film)  $\nu_{\max}$  3270, 1694, 1511, 1445, 1341, 1302, 1233, 1154, 1105, 1003, 818  $\text{cm}^{-1}$ ;  $^1\text{H}$  NMR (400 MHz, acetone- $d_6$ )  $\delta$  9.43 (br s, 2 H), 8.57 (br s, 2 H), 8.39 (br s, 4 H), 7.89 (br s, 2 H), 6.88 (d,  $J$  = 1.7 Hz, 4 H), 6.74 (d,  $J$  = 8.4 Hz, 4 H), 6.58 (d,  $J$  = 8.4 Hz, 4 H), 6.46 (s, 2 H), 6.23 (s, 2 H), 4.27 (s, 2 H), 4.13 (s, 2 H);  $^{13}\text{C}$  NMR (100 MHz, acetone- $d_6$ )  $\delta$  197.8, 159.4, 158.5, 157.1, 155.3, 148.5, 141.4, 135.7, 128.1, 124.8, 114.6, 114.2, 108.4, 106.8, 101.8, 59.3, 52.2; HRMS (FAB) calcd for  $\text{C}_{42}\text{H}_{30}\text{O}_{12}^+$  [ $\text{M}^+$ ] 726.1737, found 726.1754.

**Perbenzylated Ketone S11.** Solid  $\text{K}_2\text{CO}_3$  (0.719 g, 5.20 mmol, 60 equiv),  $\text{BnBr}$  (0.890 g, 5.20 mmol, 60 equiv), and  $n\text{-Bu}_4\text{NI}$  (0.080 g, 0.217 mmol, 2.5 equiv) were added to a solution of deprotected ketone **S10** (0.063 g, 0.087 mmol, 1.0 equiv) in dry acetone (1 mL) at 25 °C. The resultant reaction mixture was then heated at 70 °C for 24 h. Upon completion, the reaction contents were cooled to 25 °C, quenched with the addition of water (10 mL), and extracted with EtOAc ( $3 \times 10$  mL). The combined organic layers were then dried ( $\text{MgSO}_4$ ), filtered, and concentrated. The resultant crude product mixture was purified by flash column chromatography (silica gel, hexanes:EtOAc, 20:1→5:1) to afford perbenzylated ketone **S11** (0.123 g, 87% yield) as a yellow oil. **S11**:  $R_f$  = 0.61 (silica gel, hexanes:EtOAc, 2:1); IR (film)  $\nu_{\max}$  3063, 3032, 2931, 1660, 1592, 1508, 1454, 1441, 1323, 1295, 1243, 1220, 1155, 1060, 1027, 910, 829, 736, 696  $\text{cm}^{-1}$ ;  $^1\text{H}$  NMR (400 MHz, acetone- $d_6$ )  $\delta$  7.41–7.25 (m, 30 H), 7.24–7.10 (m, 16 H), 6.96–7.90 (m, 4 H), 6.88 (d,  $J$  = 6.8 Hz, 4 H), 6.84 (d,  $J$  = 8.8 Hz, 4 H), 6.73 (d,  $J$  = 8.8 Hz, 4 H), 6.76–6.69 (m, 3 H), 6.34 (s, 2 H), 4.93 (s, 8 H), 4.91 (s, 4 H), 4.83 (d,  $J$  = 12.4 Hz, 2 H), 4.78 (d,  $J$  = 12.1 Hz, 2 H), 4.75 (d,  $J$  = 12.8 Hz, 2 H), 4.71 (d,  $J$  = 12.0 Hz, 2 H), 4.53 (s, 2 H), 4.35 (s, 2 H);  $^{13}\text{C}$  NMR (100 MHz, acetone- $d_6$ )  $\delta$  196.8, 159.9, 157.9, 157.0, 156.5, 147.7, 141.8, 137.3, 137.2, 136.6, 136.5, 136.4, 128.6, 128.5, 128.3, 128.2, 128.0, 127.7, 127.6, 127.4, 126.9, 126.8, 126.4, 118.7, 114.4, 108.1, 106.9, 97.4, 70.7, 70.2, 69.9, 69.3, 58.2, 52.7; MS (FAB) calcd for  $\text{C}_{112}\text{H}_{90}\text{O}_{12}^+$  [ $\text{M}+\text{H}^+$ ] 1627.6, found 1628.1.

**Aldehydes 28 and 29.** To a slurry of  $\text{Me}_3\text{SI}$  (0.433 g, 2.12 mmol, 15 equiv) in THF (6 mL) at 0 °C was added  $n\text{-BuLi}$  (1.6 M in THF, 1.06 mL, 1.70 mmol, 12 equiv) dropwise at 0 °C over the course of 3 min, and the reaction mixture was stirred at 0 °C for an additional 4 min. A solution of ketone **S11** (0.236 g, 0.145 mmol, 1.0 equiv) in THF (4 mL) was then added dropwise over the course of 3 min at 0 °C, and the resultant solution was stirred for an additional 30 min at 0 °C.<sup>3</sup> Upon completion, the reaction contents were quenched with the addition of

saturated aqueous  $\text{NH}_4\text{Cl}$  (10 mL), poured into water (5 mL), and extracted with EtOAc ( $3 \times 10$  mL). The combined organic layers were dried ( $\text{MgSO}_4$ ), filtered, and concentrated to give the crude product as light yellow oil. Pressing forward without any additional purification, the crude epoxide was immediately dissolved in benzene (5 mL) and solid  $\text{ZnI}_2$  (0.280 g, 0.879 mmol, 6.0 equiv) was added at 25 °C in a single portion.<sup>8</sup> The resultant reaction mixture was stirred at 25 °C for 20 min. Upon completion, the reaction contents were quenched with water (10 mL) and extracted with EtOAc ( $3 \times 10$  mL). The combined organic layers were then dried ( $\text{MgSO}_4$ ), filtered, and concentrated. The resultant crude product mixture was purified by flash column chromatography (silica gel, hexanes:EtOAc, 10:1→5:1) to afford aldehydes **28** and **29** (0.182 g, 77% yield) as a mixture of diastereomers (1.8:1.0 based on  $^1\text{H}$  NMR) and as a white solid. The major diastereomer **28** could be selectively crystallized using hexanes:EtOAc (3:1) to afford clean **28** (0.061 g). The mother liquor was concentrated and purified further by flash column chromatography (silica gel, hexanes:EtOAc, 15:1→10:1) to give additional **28** (0.051 g) and **29** (0.061 g). An analytical sample of the minor aldehyde **29** was obtained by reverse-phase HPLC (Shimadzu Epic C18, 5 $\mu$ , 250  $\times$  9.6 mm, retention time = 48.0 min, 5%  $\text{H}_2\text{O}$  in MeCN). **28**:  $R_f$  = 0.60 (silica gel, hexanes:EtOAc, 2:1); IR (film)  $\nu_{\text{max}}$  3062, 3031, 2918, 1716, 1595, 1508, 1453, 1323, 1242, 1155, 1062, 1027, 829, 735, 696  $\text{cm}^{-1}$ ;  $^1\text{H}$  NMR (400 MHz,  $\text{CDCl}_3$ )  $\delta$  9.83 (s, 2 H), 7.31–7.19 (m, 50 H), 7.06 (d,  $J$  = 8.6 Hz, 4 H), 6.87–6.84 (m, 4 H), 6.85 (d,  $J$  = 8.6 Hz, 4 H), 6.44 (t,  $J$  = 2.2 Hz, 2 H), 6.36 (s, 2 H), 6.06 (d,  $J$  = 2.2 Hz, 4 H), 4.95 (d,  $J$  = 11.8 Hz, 2 H), 4.90 (d,  $J$  = 11.8 Hz, 2 H), 4.89 (s, 4 H), 4.79 (s, 2 H), 4.76 (s, 4 H), 4.73 (s, 4 H), 4.72 (d,  $J$  = 11.6 Hz, 2 H), 4.52 (t,  $J$  = 2.8 Hz, 2 H), 4.50 (s, 2 H), 4.15 (t,  $J$  = 2.8 Hz, 2 H);  $^{13}\text{C}$  NMR (100 MHz,  $\text{CDCl}_3$ )  $\delta$  200.9, 159.9, 157.4, 156.9, 155.1, 148.9, 139.9, 139.3, 137.0, 136.8, 136.5, 136.4, 129.5, 128.6, 128.5, 128.2, 128.0, 127.9, 127.8, 127.7, 127.6, 127.5, 127.4, 127.2, 127.1, 115.6, 114.7, 107.9, 101.3, 97.5, 71.1, 70.0, 69.9, 69.7, 60.7, 58.7, 56.8; MS (FAB) calcd for  $\text{C}_{114}\text{H}_{94}\text{O}_{12}^+$  [ $\text{M}+\text{H}^+$ ] 1655.7, found 1656.1. **29**:  $R_f$  = 0.62 (silica gel, hexanes:EtOAc, 2:1); IR (film)  $\nu_{\text{max}}$  3031, 2920, 1719, 1597, 1454, 1324, 1241, 1156, 1119, 1067, 1027, 830, 736, 697  $\text{cm}^{-1}$ ;  $^1\text{H}$  NMR (400 MHz,  $\text{CDCl}_3$ )  $\delta$  9.99 (s, 1 H), 9.79 (s, 1 H), 7.36–7.26 (m, 30 H), 7.25–7.15 (m, 16 H), 7.02–6.99 (m, 2 H), 6.95–6.87 (m, 4 H), 6.87–6.81 (m, 2 H), 6.58–6.54 (m, 3 H), 6.49 (d,  $J$  = 8.7 Hz, 2 H), 6.46 (t,  $J$  = 2.2 Hz, 1 H), 6.38 (d,  $J$  = 2.2 Hz, 2 H), 6.30 (s, 1 H), 6.24 (s, 1 H), 6.13 (d,  $J$  = 2.1 Hz, 2 H), 4.95–4.89 (m, 6 H), 4.86 (d,  $J$  = 3.9 Hz, 1 H), 4.84–4.81 (m, 4 H), 4.79 (s, 2 H), 4.76 (s, 1 H), 4.75 (d,  $J$  = 12.0 Hz, 1 H), 4.73–4.67 (m, 4 H), 4.64 (d,  $J$  = 12.0 Hz, 1 H), 4.55 (d,  $J$  = 12.0 Hz, 1 H), 4.45 (dd,  $J$  = 8.2, 2.2 Hz, 1 H), 4.42 (s, 1 H), 4.32 (dd,  $J$  = 8.3, 2.3 Hz, 1 H), 4.15 (d,  $J$  = 2.7 Hz, 1 H);  $^{13}\text{C}$  NMR (100 MHz,  $\text{CDCl}_3$ )  $\delta$  201.2, 160.0, 159.9, 157.6, 157.4 (2 C), 156.9 (2 C), 155.3, 154.9 (2 C), 148.6, 148.4, 140.0, 139.2, 139.0, 138.0, 137.0 (2 C), 136.8, 136.6 (2 C), 136.5, 136.4, 136.3, 129.4, 128.8, 128.6, 128.5 (3 C), 128.4, 128.3, 128.2, 128.0, 127.9 (2 C), 127.8 (3 C), 127.7, 127.6, 127.5, 127.4, 127.1, 127.0, 126.9, 115.7, 114.7, 114.0, 113.4, 108.0, 107.5, 101.3, 101.2, 97.6, 97.3, 71.0, 70.5, 70.1, 70.0, 69.9, 69.8, 69.6, 69.4, 60.0, 59.7, 58.3 (2 C), 57.0, 54.3; MS (FAB) calcd for  $\text{C}_{114}\text{H}_{94}\text{O}_{12}^+$  [ $\text{M}+\text{H}^+$ ] 1655.7, found 1656.1.

**Epimerization of Aldehyde 29 into 28.** A mixture of aldehydes **28** and **29** (d.r. = 1:10, based on  $^1\text{H}$  NMR, 0.052 g, 0.031 mmol, 1.0 equiv) was dissolved in THF (3 mL) and cooled to –78 °C. KHMDS (1.0 M in THF, 0.035 mL, 0.035 mmol, 1.1 equiv) was then added dropwise over the course of 4 min and the resultant yellow solution was stirred at –78 °C for an additional 10 min. Upon completion, the reaction contents were quenched at –78 °C with the addition of saturated aqueous  $\text{NH}_4\text{Cl}$  (4 mL), warmed to 25 °C, poured into water (4 mL) and extracted with EtOAc ( $3 \times 5$  mL). The combined organic layers were dried ( $\text{MgSO}_4$ ), filtered, and concentrated

to give the crude mixture of recovered aldehydes as a light yellow oil which was purified by flash column chromatography (silica gel, hexanes:EtOAc, 10:1→5:1) to afford aldehyde **28** (0.031 g, 61% yield) as a white solid and as primarily a single diastereomer (d.r. = 21:1 based on  $^1\text{H}$  NMR).

**Ampelopsin H (17).** To a solution of aldehyde **28** (0.047 g, 0.028 mmol, 1.0 equiv) in THF (1 mL) at 25 °C was added 4-benzyloxyphenylmagnesium bromide (**S7**, 1.0 M in THF, 0.227 mL, 0.227 mmol, 8.0 equiv), and the resultant solution was stirred for 45 min at 25 °C. Upon completion, the reaction contents were quenched with saturated aqueous  $\text{NH}_4\text{Cl}$  (3 mL), poured into water (3 mL), and extracted with EtOAc ( $3 \times 5$  mL). The combined organic layers were then dried ( $\text{MgSO}_4$ ), filtered, and concentrated. The resultant crude product was purified by flash column chromatography (silica gel, hexanes:EtOAc, 10:1→1:1) to afford the desired alcohol product (0.049 g, 86% yield) as a mixture of diastereomers (d.r. = 2:1 based on  $^1\text{H}$  NMR analysis). The major diastereomer could be crystallized from hexanes:EtOAc (2:1) to afford an analytical sample. [Note: this compound was used as a mixture of diastereomers for the final transformation].  $R_f$  = 0.31 (silica gel, hexanes:EtOAc, 1:1); IR (film)  $\nu_{\text{max}}$  2919, 2851, 1594, 1509, 1454, 1379, 1316, 1242, 1156, 1113, 1027, 829, 735, 696  $\text{cm}^{-1}$ ;  $^1\text{H}$  NMR (400 MHz,  $\text{CDCl}_3$ )  $\delta$  7.49–7.42 (m, 4 H), 7.36–7.19 (m, 48 H), 7.16–7.10 (m, 8 H), 6.96 (d,  $J$  = 8.7 Hz, 4 H), 6.91 (d,  $J$  = 8.6 Hz, 4 H), 6.73 (d,  $J$  = 8.8 Hz, 4 H), 6.66 (s, 1 H), 6.61 (d,  $J$  = 8.7 Hz, 4 H), 6.45 (s, 2 H), 6.27 (t,  $J$  = 2.2 Hz, 2 H), 5.86 (d,  $J$  = 2.2 Hz, 4 H), 5.73 (dd,  $J$  = 10.1, 2.6 Hz, 2 H), 5.12 (d,  $J$  = 11.4 Hz, 2 H), 5.03 (d,  $J$  = 11.4 Hz, 2 H), 4.96 (s, 4 H), 4.89 (d,  $J$  = 11.7 Hz, 2 H), 4.88 (s, 2 H), 4.81 (d,  $J$  = 11.8 Hz, 2 H), 4.63 (s, 4 H), 4.46 (d,  $J$  = 11.6 Hz, 2 H), 4.45 (s, 4 H), 4.43 ( $J$  = 11.6 Hz, 4 H), 4.15 (s, 2 H), 3.01 (d,  $J$  = 2.9 Hz, 2 H);  $^{13}\text{C}$  NMR (100 MHz,  $\text{CDCl}_3$ )  $\delta$  159.1, 157.9, 157.7, 156.9, 154.2, 148.6, 144.0, 139.0, 137.1, 137.0, 136.9, 136.5, 135.4, 129.6, 128.8, 128.7, 128.5, 128.4, 128.3, 127.8 (2 C), 127.6, 127.4 (2 C), 118.0, 114.0, 113.7, 108.1, 101.1, 98.1, 75.4, 71.6, 70.0, 69.7 (2 C), 58.9, 57.0, 55.6; MS (FAB) calcd for  $\text{C}_{140}\text{H}_{117}\text{NaO}_{14}^+$  [ $\text{M}+\text{Na}^+$ ] 2044.8, found 2044.9 This intermediate alcohol (0.021 g, 0.010 mmol, 1.0 equiv, utilized as a mixture of diastereomers) was dissolved in a mixture of EtOAc:MeOH (1:1, 3 mL) and solid Pd/C (30%, 15 mg) was added.  $\text{H}_2$  was then bubbled directly through the stirred reaction mixture for 30 min.<sup>4</sup> Once complete, some additional MeOH was added to replace any evaporated solvent to rereach ~3 mL reaction volume and the reaction mixture was stirred under  $\text{H}_2$  (balloon) for 2 h.  $\text{H}_2$  was bubbled through the stirred reaction mixture again for 30 min and the reaction mixture again was refilled with MeOH to account for lost solvent. This process was repeated one more time after stirring the reaction under  $\text{H}_2$  for 2 h and finally the reaction was stirred under  $\text{H}_2$  for 12 h.<sup>5</sup> Upon completion of the reaction, the reaction solution was filtered through simple filtration paper to remove Pd/C and washed with MeOH (2 mL).<sup>6</sup> Next, Amberlite (IR-12OH, 0.100 g, pre-washed with MeOH five times) was added to the filtrate and the resultant mixture was stirred at 25 °C for 1 h. When this operation was complete, the solution was filtered through simple filtration paper to remove the Amberlite and the filtrate was concentrated directly to afford ampelopsin H (**17**) as a white solid. This was purified by reverse-phase HPLC<sup>7</sup> (Shimadzu Epic C18,  $5\mu$ ,  $250 \times 9.6$  mm, retention time = 15.0 min, 45% MeOH in  $\text{H}_2\text{O}$ ) to give ampelopsin H (**17**, 6.7 mg, 71% yield) as a white solid. **17**:  $R_f$  = 0.28 (silica gel,  $\text{CH}_2\text{Cl}_2$ :MeOH, 3:1); IR (film)  $\nu_{\text{max}}$  3372, 1602, 1512, 1462, 1347, 1248, 1203, 1156, 1087, 828  $\text{cm}^{-1}$ ;  $^1\text{H}$  NMR (400 MHz, acetone- $d_6$ )  $\delta$  8.46 (s, 2 H), 8.15 (s, 4 H), 7.91 (s, 2 H), 7.79 (s, 2 H), 7.25 (d,  $J$  = 8.5 Hz, 4 H), 6.88 (d,  $J$  = 8.5 Hz, 4 H), 6.46 (d,  $J$  = 8.6 Hz, 4 H), 6.38 (d,  $J$  = 8.6 Hz, 4 H), 6.29 (t,  $J$  = 2.2 Hz, 2 H), 6.25 (d,  $J$  = 2.2 Hz, 4 H), 6.24 (s, 2 H), 5.27 (d,  $J$  = 7.6 Hz, 2 H), 4.86 (d,  $J$  = 7.6 Hz, 2 H), 4.61 (s, 2 H), 3.52 (s, 2 H);  $^{13}\text{C}$  NMR (100 MHz,

acetone- $d_6$ )  $\delta$  162.9, 160.1, 158.4, 156.1, 155.5, 145.4, 145.2, 136.6, 133.3, 129.2, 128.8, 125.3, 116.6, 116.2, 115.5, 107.6, 102.3, 97.0, 94.8, 59.5, 57.1, 49.4; HRMS (FAB) calcd for  $C_{56}H_{43}O_{12}^+$   $[M+H]^+$  907.2755, found 907.2726. All spectroscopic data for **17** match that reported by Tanaka and co-workers.<sup>9</sup> For a direct comparison, see Table S2.

**Unnatural Analog 30.** To a solution of aldehyde **29** (0.022 g, 0.013 mmol, 1.0 equiv) in THF (1 mL) at 25 °C was added 4-benzyloxyphenylmagnesium bromide (**S7**, 1.0 M in THF, 0.106 mL, 0.106 mmol, 8.0 equiv), and the resultant solution was stirred for 45 min at 25 °C. Upon completion, the reaction contents were quenched with saturated aqueous  $NH_4Cl$  (3 mL), poured into water (3 mL), and extracted with EtOAc ( $3 \times 5$  mL). The combined organic layers were then dried ( $MgSO_4$ ), filtered, and concentrated. The resultant crude product was purified by flash column chromatography (silica gel, hexanes:EtOAc, 10:1 $\rightarrow$ 1:1) to afford the desired intermediate alcohol (0.021 g, 78% yield) as a complex mixture of diastereomers based on  $^1H$  NMR analysis. Pressing forward, a portion of this newly synthesized alcohol (0.015 g, 0.007 mmol, 1.0 equiv) was dissolved in a mixture of EtOAc:MeOH (1:1, 3 mL) and solid Pd/C (30%, 15 mg) was added.  $H_2$  was then bubbled directly through the stirred reaction mixture for 30 min.<sup>4</sup> Once complete, some additional MeOH was added to replace any evaporated solvent to rereach  $\sim 3$  mL reaction volume and the reaction mixture was stirred under  $H_2$  (balloon) for 2 h.  $H_2$  was bubbled through the stirred reaction mixture again for 30 min and the reaction mixture again was refilled with MeOH to account for lost solvent. This process was repeated one more time after stirring the reaction under  $H_2$  for 2 h and finally the reaction was stirred under  $H_2$  for 12 h.<sup>5</sup> Upon completion of the reaction, the reaction solution was filtered through simple filtration paper to remove Pd/C and washed with MeOH (2 mL).<sup>6</sup> Next, Amberlite (IR-12OH, 0.100 g, pre-washed with MeOH five times) was added to the filtrate and the resultant mixture was stirred at 25 °C for 1 h. When this operation was complete, the solution was filtered through simple filtration paper to remove the Amberlite and the filtrate was concentrated directly to afford ampelopsin H analog (**30**) as a white solid which was purified by preparative TLC ( $CH_2Cl_2$ :MeOH, 3:1) to give ampelopsin H analog **30** (4.3 mg, 65% yield) as a white solid. **30**:  $R_f$  = 0.30 (silica gel,  $CH_2Cl_2$ :MeOH, 3:1); IR (film)  $\nu_{max}$  3323, 1611, 1512, 1455, 1343, 1259, 1161, 1084, 1008, 832  $cm^{-1}$ ;  $^1H$  NMR (800 MHz, acetone- $d_6$ )  $\delta$  8.61 (s, 1 H), 8.48 (s, 1 H), 8.29 (s, 4 H), 8.11 (s, 1 H), 8.03 (s, 1 H), 7.94 (s, 1 H), 7.33 (d,  $J$  = 8.4 Hz, 2 H), 7.22 (d,  $J$  = 8.5, 2 H), 7.19 (s, 1 H), 6.94 (d,  $J$  = 8.4 Hz, 2 H), 6.83 (d,  $J$  = 8.0 Hz, 4 H), 6.61 (d,  $J$  = 8.4 Hz, 2 H), 6.47 (d,  $J$  = 8.4 Hz, 2 H), 6.36 (d,  $J$  = 8.1 Hz, 2 H), 6.34 (s, 1 H), 6.32 (t,  $J$  = 2.0 Hz, 1 H), 6.29–6.26 (m, 4 H), 6.19 (s, 1 H), 5.37 (s, 1 H), 5.29 (d,  $J$  = 7.5 Hz, 1 H), 4.93 (d,  $J$  = 7.5 Hz, 1 H), 4.64 (s, 1 H), 4.48 (s, 1 H), 4.37 (s, 1 H), 3.74 (d,  $J$  = 6.0 Hz, 1 H), 3.60 (d,  $J$  = 6.0 Hz, 1 H);  $^{13}C$  NMR (200 MHz, acetone- $d_6$ )  $\delta$  162.6, 162.4, 161.7, 159.3, 159.2, 157.5, 157.1, 155.1, 154.7, 154.5, 148.0, 147.6, 144.6, 144.5, 143.5, 137.2, 136.0, 133.8, 132.6, 132.5, 128.2, 128.1, 127.8, 126.5, 125.3, 124.4, 115.7, 115.3, 115.2, 114.7, 114.5, 106.6, 105.4, 101.3, 96.1, 95.8, 93.7, 92.9, 59.2, 59.0, 56.1, 55.9, 49.3, 48.2; HRMS (FAB) calcd for  $C_{56}H_{43}O_{12}^+$   $[M]^+$  906.3, found 906.4.

**Permethylated Ampelopsin F (31).** Synthesized according to published procedures.<sup>1</sup> **31**:  $R_f$  = 0.69 (silica gel, hexanes:EtOAc, 1:1); IR (film)  $\nu_{max}$  2997, 2936, 2835, 1604, 1511, 1487, 1462, 1319, 1248, 1206, 1176, 1140, 1091, 1037, 832  $cm^{-1}$ ;  $^1H$  NMR (400 MHz,  $CDCl_3$ )  $\delta$  7.11 (d,  $J$  = 8.4 Hz, 2 H), 6.84 (d,  $J$  = 8.4 Hz, 2 H), 6.83 (d,  $J$  = 8.8 Hz, 2 H), 6.66 (d,  $J$  = 8.8 Hz, 2 H), 6.58 (d,  $J$  = 1.6 Hz, 1 H), 6.53 (d,  $J$  = 2.0 Hz, 1 H), 6.26 (d,  $J$  = 2.4 Hz, 1 H), 6.19 (d,  $J$  = 1.6 Hz, 1 H), 4.22 (s, 1 H), 4.19 (s, 1 H), 3.84 (s, 3 H), 3.81 (s, 3 H), 3.77 (s, 3 H), 3.75 (s, 4 H), 3.74 (s, 1 H), 3.68 (s, 3 H), 3.44 (s, 4 H);  $^{13}C$  NMR (100 MHz,  $CDCl_3$ )  $\delta$  160.6, 159.6, 159.0, 157.7, 157.6, 155.0, 146.2, 145.6, 139.2, 135.6, 129.8, 128.8, 128.6, 115.9, 113.5, 103.1, 101.5,

97.1 (2 C), 57.3, 55.6, 55.5, 55.4, 55.3, 55.2, 49.9, 49.1, 46.3; HRMS (FAB) calcd for  $C_{34}H_{34}O_6^+$  [ $M^+$ ] 538.6302, found 538.2374.

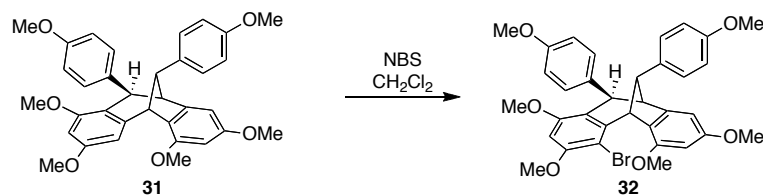

**Figure S9.** Synthesis of monobromide **32** from intermediate **31**. Reagents and Conditions: NBS (0.9 equiv),  $CH_2Cl_2$ ,  $-78^\circ C$ , 1 h,  $-78^\circ C$  to  $25^\circ C$ , 2 h, 88-95%.

**Monobromide 32.** Permethylated ampelopsin F (**31**, 0.034 g, 0.063 mmol, 1.0 equiv) was dissolved in  $CH_2Cl_2$  (1.5 mL), cooled to  $-78^\circ C$ , and then NBS (0.010 g, 0.056 mmol, 0.9 equiv) was added in a single portion. The resultant solution was stirred at  $-78^\circ C$  for 1 h and then was warmed to  $25^\circ C$  over the course of 2 h. Upon completion, the reaction contents were quenched with saturated aqueous  $NaHCO_3$  (5 mL) and saturated aqueous  $Na_2SO_3$  (5 mL), poured into water (5 mL), and extracted with EtOAc ( $3 \times 10$  mL). The combined organic layers were then dried ( $MgSO_4$ ), filtered, and concentrated. The resultant amorphous product was purified by flash column chromatography (silica gel, hexanes:EtOAc, 9:1 $\rightarrow$ 1:1) to afford bromide **32** (0.037 g, 95% yield) as an off-white foam. In general in these experiments, it is worth noting that the NBS used was not recrystallized from the commercial sample; upon dissolution we always observed some yellow coloration indicating the presence of  $Br_2$  which had the same selectivity in bromination pattern as NBS. For this reason, we always observed some over halogenation relative to the amount of NBS used, accounting here for the yield observed. **32**:  $R_f$  = 0.64 (silica gel, hexanes:EtOAc, 1:1); IR (film)  $\nu_{max}$  2935, 2835, 1598, 1511, 1488, 1461, 1434, 1321, 1249, 1204, 1178, 1148, 1133, 1075, 1036, 830, 779  $cm^{-1}$ ;  $^1H$  NMR (400 MHz,  $CDCl_3$ )  $\delta$  7.06 (d,  $J$  = 8.4 Hz, 2 H), 6.84 (d,  $J$  = 8.4 Hz, 2 H), 6.81 (d,  $J$  = 8.8 Hz, 2 H), 6.65 (d,  $J$  = 8.8 Hz, 2 H), 6.56 (d,  $J$  = 1.6 Hz, 1 H), 6.30 (s, 1 H), 6.18 (d,  $J$  = 2.0 Hz, 1 H), 4.98 (s, 1 H), 4.24 (d,  $J$  = 1.6 Hz, 1 H), 3.88 (s, 3 H), 3.80 (s, 3 H), 3.77 (s, 3 H), 3.72 (s, 3 H), 3.68 (s, 4 H), 3.44 (s, 3 H), 3.38 (s, 1 H);  $^{13}C$  NMR (100 MHz,  $CDCl_3$ )  $\delta$  160.9, 158.5, 157.8, 157.7, 155.7, 155.2, 146.3, 145.2, 139.1, 135.3, 128.8, 128.7 (2 C), 118.3, 113.9, 113.5, 102.3, 101.1, 97.1, 95.4, 57.1, 56.5, 55.6 (2 C), 55.3 (2 C), 49.8, 47.9, 46.4; HRMS (FAB) calcd for  $C_{34}H_{33}BrO_6^+$  [ $M^+$ ] 617.5262, found 616.1471 (for  $^{79}Br$ ). We note that a large-scale run of this reaction performed with 0.590 g of **31** provided 0.730 g of an 8:1 mixture of **32** and **33** following extraction that was free of other impurities; this result accounts for a total of 0.640 g of **32** (88% yield) and 0.090 g (12% yield) of **33**. Again, the overall level of purity for the NBS here dictated the amount of halogenation observed using 0.9 equivalents of NBS.

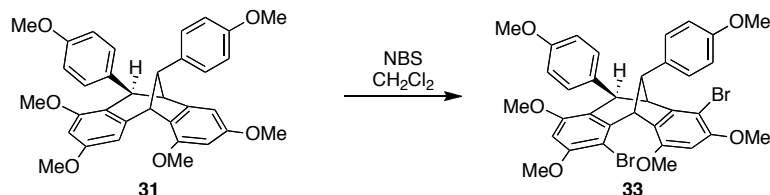

**Figure S10.** Synthesis of dibromide **33** from intermediate **31**. Reagents and Conditions: NBS (2.0 equiv),  $CH_2Cl_2$ ,  $-78^\circ C$ , 2 h, 99%.

**Dibromide 33.** Permethylated ampelopsin F (**31**, 0.178 g, 0.330 mmol, 1.0 equiv) was dissolved in THF (6 mL), cooled to  $-78^\circ C$ , and then NBS (0.117 g, 0.660 mmol, 2.0 equiv) was

added in a single portion. The resultant solution was stirred at  $-78\text{ }^{\circ}\text{C}$  for 2 h. Upon completion, the reaction contents were quenched with saturated aqueous  $\text{NaHCO}_3$  (15 mL), poured into water (5 mL), and extracted with EtOAc ( $2 \times 10\text{ mL}$ ). The combined organic layers were then dried ( $\text{MgSO}_4$ ), filtered, and concentrated. The resultant crude product mixture was purified by flash column chromatography (silica gel, hexanes:EtOAc, 10:1 $\rightarrow$ 4:1) to afford dibromide **33** (0.229 g, 99% yield) as a colorless oil. **33**:  $R_f$  = 0.32 (silica gel, hexanes:EtOAc, 2:1); IR (film)  $\nu_{\text{max}}$  2999, 2935, 2835, 1607, 1585, 1510, 1461, 1433, 1321, 1249, 1218, 1204, 1179, 1151, 1140, 1076,  $1035\text{ cm}^{-1}$ ;  $^1\text{H}$  NMR (400 MHz,  $\text{CDCl}_3$ )  $\delta$  7.12 (d,  $J$  = 8.2 Hz, 2 H), 6.87 (d,  $J$  = 8.3 Hz, 2 H), 6.82 (d,  $J$  = 8.3 Hz, 2 H), 6.68 (d,  $J$  = 8.3 Hz, 2 H), 6.32 (s, 1 H), 6.19 (s, 1 H), 5.08 (s, 1 H), 4.37 (s, 1 H), 3.88 (s, 3 H), 3.83 (s, 3 H), 3.79 (s, 3 H), 3.73 (s, 3 H), 3.68 (br s, 5 H), 3.45 (s, 3 H);  $^{13}\text{C}$  NMR (100 MHz,  $\text{CDCl}_3$ )  $\delta$  158.4, 157.8, 157.5, 156.0, 155.1, 154.6, 145.9, 144.4, 138.5, 134.4, 128.8, 128.5, 128.4, 117.8, 113.5, 113.4, 102.0, 99.1, 95.6, 95.3, 56.7, 56.4, 56.3, 55.5, 55.4, 55.2, 55.1, 49.7, 48.8, 43.6; HRMS (FAB) calcd for  $\text{C}_{34}\text{H}_{32}\text{O}_6\text{Br}_2^+$  [ $\text{M}^+$ ] 694.0566, found 694.0543 (for  $^{79}\text{Br}$ ).

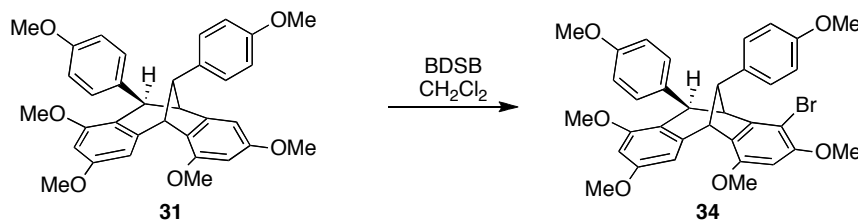

**Figure S11.** Synthesis of monobromide **34** from intermediate **31**. Reagents and Conditions: BDSB (0.9 equiv),  $\text{CH}_2\text{Cl}_2$ ,  $-78\text{ }^{\circ}\text{C}$ , 2 h, 78%.

**Monobromide 34.** Permethylated ampelopsin F (**31**, 0.560 g, 1.04 mmol, 1.0 equiv) was dissolved in  $\text{CH}_2\text{Cl}_2$  (20 mL), cooled to  $-78\text{ }^{\circ}\text{C}$ , and then BDSB (0.516 g, 0.94 mmol, 0.9 equiv) was added in a single portion. The resultant solution was stirred at  $-78\text{ }^{\circ}\text{C}$  for 2 h. Upon completion, the reaction contents were quenched with saturated aqueous  $\text{NaHCO}_3$  (20 mL) and saturated aqueous  $\text{Na}_2\text{SO}_3$  (50 mL), and extracted with EtOAc ( $2 \times 50\text{ mL}$ ). The combined organic layers were then dried ( $\text{MgSO}_4$ ), filtered, and concentrated. The resultant amorphous product was purified by flash column chromatography (silica gel, hexanes:EtOAc, 10:1 $\rightarrow$ 4:1) to afford bromide **34** contaminated with a trace of dibromide **33** (0.560 g total, 0.500 g **34** based on NMR integration, 78%, 85% yield based on recovered starting material) as an amorphous off-white solid and recovered permethylated ampelopsin F (**34**, 0.045 g, 8%). An analytical sample was obtained by running the reaction less to completion as the dibromide cannot be separated. [Note: the large scale reaction was run to test the robustness of the method; key is to note that monobromide **32** was not detected by NMR analysis]. **34**:  $R_f$  = 0.56 (silica gel, hexanes:EtOAc, 1:1); IR (film)  $\nu_{\text{max}}$  2935, 2835, 1606, 1583, 1510, 1462, 1434, 1336, 1320, 1248, 1209, 1178, 1140, 1080, 1036, 966,  $830\text{ cm}^{-1}$ ;  $^1\text{H}$  NMR (400 MHz,  $\text{CDCl}_3$ )  $\delta$  7.15 (d,  $J$  = 8.8 Hz, 2 H), 6.84 (d,  $J$  = 8.4 Hz, 2 H), 6.81 (d,  $J$  = 8.4 Hz, 2 H), 6.66 (d,  $J$  = 8.8 Hz, 2 H), 6.50 (d,  $J$  = 2.4 Hz, 1 H), 6.27 (d,  $J$  = 2.4 Hz, 1 H), 6.19 (s, 1 H), 4.34 (s, 1 H), 4.25 (s, 1 H), 3.83 (s, 3 H), 3.83 (s, 3 H), 3.79 (s, 3 H), 3.75 (s, 3 H), 3.69 (s, 1 H), 3.69 (s, 4 H), 3.44 (s, 3 H);  $^{13}\text{C}$  NMR (100 MHz,  $\text{CDCl}_3$ )  $\delta$  159.7, 159.1, 157.9, 157.7, 156.0, 154.1, 145.6, 145.5, 138.8, 135.0, 130.0, 128.8, 128.6, 115.7, 113.7, 113.6, 113.5, 103.1, 97.2, 95.8, 57.2, 56.7, 55.8, 55.5, 55.4, 55.3 (2 C), 51.0, 49.2, 43.7; HRMS (FAB) calcd for  $\text{C}_{34}\text{H}_{33}\text{BrO}_6^+$  [ $\text{M}^+$ ] 617.5262, found 616.1465 (for  $^{79}\text{Br}$ ).

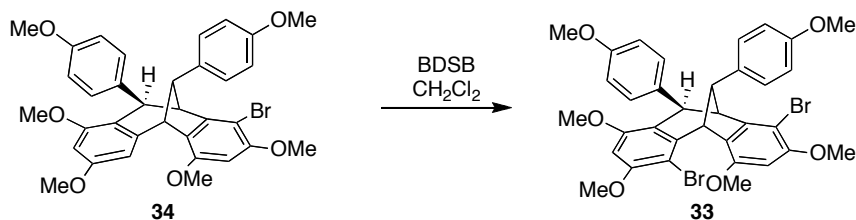

**Figure S12.** Synthesis of dibromide **33** from monobromide **34**. Reagents and Conditions: BDSB (1.1 equiv),  $\text{CH}_2\text{Cl}_2$ ,  $-78^\circ\text{C}$ , 2 h, 99%.

**Dibromide 33.** Monobromide **34** (0.015 g, 0.024 mmol, 1.0 equiv) was dissolved in  $\text{CH}_2\text{Cl}_2$  (10 mL), cooled to  $-78^\circ\text{C}$ , and then BDSB (0.014 g, 0.025 mmol, 1.1 equiv) was added in a single portion. The resultant solution was stirred at  $-78^\circ\text{C}$  for 2 h. Upon completion, the reaction contents were quenched with saturated aqueous  $\text{NaHCO}_3$  (10 mL) and saturated aqueous  $\text{Na}_2\text{SO}_3$  (10 mL), and extracted with EtOAc ( $2 \times 10$  mL). The combined organic layers were then dried ( $\text{MgSO}_4$ ), filtered, and concentrated. The resultant amorphous product was purified by flash column chromatography (silica gel, hexanes:EtOAc, 10:1 $\rightarrow$ 4:1) to afford dibromide **33** (0.016 g, 99% yield) as an amorphous off-white solid.

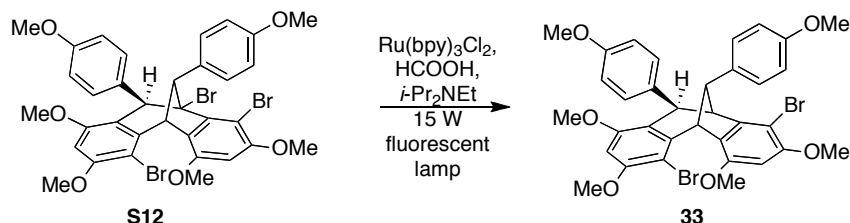

**Figure S13.** Alternate synthesis of dibromide **33** from intermediate **S12**. Reagents and Conditions:  $\text{Ru}(\text{bpy})_3\text{Cl}_2 \cdot 7\text{H}_2\text{O}$  (0.1 equiv),  $i\text{-Pr}_2\text{NEt}$  (20.0 equiv),  $\text{HCOOH}$  (20.0 equiv), DMF, degassed, 15 W fluorescent lamp,  $25^\circ\text{C}$ , 15 h, 89%.

**Dibromide 33.** A round-bottomed flask was charged sequentially with  $\text{Ru}(\text{bpy})_3\text{Cl}_2 \cdot 7\text{H}_2\text{O}$  (2.0 mg, 0.003 mmol, 0.1 equiv), tribromide **S12** (0.025 g, 0.033 mmol, 1.0 equiv),  $i\text{-Pr}_2\text{NEt}$  (0.011 mL, 0.650 mmol, 20 equiv), and formic acid (0.032 mL, 0.650 mmol, 20 equiv). Finally, DMF (2.5 mL) was added at  $25^\circ\text{C}$  and the resultant mixture was degassed by argon sparging for 20 min, and placed at a distance of  $\sim 10$  cm from a 15 W fluorescent lamp.<sup>2</sup> After turning the lamp on and stirring at  $25^\circ\text{C}$  for 15 h, the reaction contents were poured into saturated aqueous  $\text{NaHCO}_3$  (10 mL) and extracted with EtOAc ( $3 \times 10$  mL). The combined organic layers were then dried ( $\text{MgSO}_4$ ), filtered, and concentrated. The resultant crude product mixture was purified by flash column chromatography (silica gel, hexanes:EtOAc, 10:1 $\rightarrow$ 4:1) to afford dibromide **33** (0.020 g, 89% yield) as a white solid.

## Total Synthesis of Carasiphenol B (19).

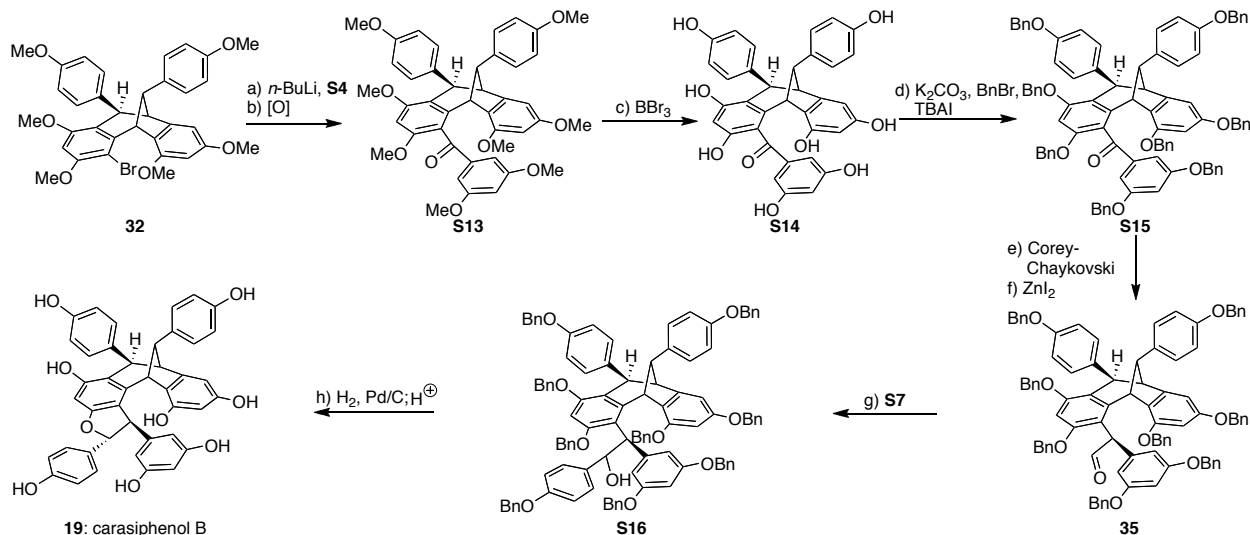

**Figure S14.** Total synthesis of carasiphenol B (**19**) from monobromide **32**. Reagents and Conditions: a) *n*-BuLi (1.6 M in THF, 1.3 equiv), THF, -78 °C, 10 min, then **S4** (3.0 equiv), THF, -78 °C, 2 h, -78 °C to 25 °C, 2 h, 58%; b) NaHCO<sub>3</sub> (21.0 equiv), DMP (2.3 equiv), CH<sub>2</sub>Cl<sub>2</sub>, 25 °C, 1 h, 97%; c) BBr<sub>3</sub> (1.0 M in CH<sub>2</sub>Cl<sub>2</sub>, 40.0 equiv), CH<sub>2</sub>Cl<sub>2</sub>, sealed tube, 70 °C, 5 d, 96%; d) K<sub>2</sub>CO<sub>3</sub> (40.0 equiv), BnBr (43 equiv), *n*-Bu<sub>4</sub>Ni (2.0 equiv), acetone, 70 °C, 15 h, 78%; e) Me<sub>3</sub>Si (20.0 equiv), *n*-BuLi (1.6 M in THF, 16.0 equiv), THF, 0 °C, 2 min, then **S15**, 0 °C, 1 h; f) ZnI<sub>2</sub> (31.0 equiv), benzene, 25 °C, 1 h, 94% (over 2 steps); g) **S7** (1.0 M in THF, 6.0 equiv), THF, 25 °C, 1 h, 68%; h) H<sub>2</sub>, 30% Pd/C, EtOAc:MeOH (1:1) to MeOH, 25 °C, 12 h, then Amberlite IR-120H, 25 °C, 1 h, 89% (over 2 steps).

**Ketone S13.** Monobromide **32** (0.053 g, 0.086 mmol, 1.0 equiv) was azeotroped with benzene (3 × 3 mL), dissolved in THF (1.5 mL), and then cooled to -78 °C. Next, *n*-BuLi (1.6 M in THF, 0.067 mL, 0.107 mmol, 1.25 equiv) was added dropwise over the course of 5 min and the reaction mixture was stirred at -78 °C for an additional 10 min, ultimately yielding a solution with a slight yellow color. A solution of benzene-azeotroped (3 × 3 mL) 3,5-dimethoxybenzaldehyde (**S4**, 0.043 g, 0.257 mmol, 3.0 equiv) in THF (1.5 mL) was then added dropwise over 5 min at -78 °C. After stirring the resultant solution for an additional 2 h at -78 °C, the reaction was then allowed to slowly warm to 25 °C over the course of 2 h. Upon completion, the reaction contents were quenched with saturated aqueous NH<sub>4</sub>Cl (5 mL), poured into water (5 mL) and extracted with EtOAc (3 × 5 mL). The combined organic layers were then dried (MgSO<sub>4</sub>), filtered, and concentrated. The resultant crude yellow oil was purified by flash column chromatography (silica gel, hexanes:EtOAc, 4:1→1:1) to afford the desired alcohol product as a mixture of diastereomers (0.035 g, 58% yield) as an off-white solid, alongside debrominated permethylated ampelopsin F **31** (0.012 g, 26% yield). After repeating this reaction several times, the mixture of alcohol diastereomers (0.237 g, 0.336 mmol, 1.0 equiv) was dissolved in CH<sub>2</sub>Cl<sub>2</sub> (8 mL) and solid NaHCO<sub>3</sub> (0.600 g, 7.14 mmol, 21 equiv) and Dess–Martin periodinane (0.330 g, 0.778 mmol, 2.3 equiv) were added sequentially at 25 °C. The resultant mixture was stirred at 25 °C for 1 h. Upon completion, the reaction contents were quenched with saturated aqueous Na<sub>2</sub>SO<sub>3</sub> (40 mL) and the resultant slurry was stirred for an additional 20 min at 25 °C before being poured into water (20 mL) and extracted with EtOAc (3 × 50 mL). The combined organic layers were then washed with water (20 mL) and brine (20 mL), dried (MgSO<sub>4</sub>), filtered, and concentrated to afford ketone **S13** (0.230 g, 97% yield) as a white amorphous solid. **S13**: *R*<sub>f</sub> = 0.38 (silica gel, hexanes:EtOAc, 1:1); IR (film)  $\nu_{\text{max}}$  2935, 2836, 1723, 1661, 1589, 1511, 1460, 1428, 1316, 1249, 1204, 1178, 1155, 1111, 1080, 1036, 832, 758, 737 cm<sup>-1</sup>; <sup>1</sup>H NMR (400 MHz, CDCl<sub>3</sub>)  $\delta$  7.13 (d, *J* = 8.4 Hz, 2 H), 7.04 (br s, 2 H), 6.82 (d, *J* = 8.4 Hz, 2 H), 6.75 (d, *J* = 8.8 Hz, 2 H), 6.65 (t, *J* = 2.4 Hz, 1 H), 6.58 (d, *J* = 8.8 Hz, 2 H), 6.56 (d, *J* = 1.6 Hz, 1 H), 6.27 (s, 1 H), 5.99 (d, *J* = 2.0 Hz, 1H), 4.46 (br s, 1 H), 4.28 (d, *J* = 1.6 Hz,

1 H), 3.80 (s, 9 H), 3.78 (s, 1 H), 3.76 (s, 3 H), 3.64 (s, 3 H), 3.62 (s, 3 H), 3.50 (s, 3 H), 3.41 (s, 1 H), 2.97 (br s, 3 H);  $^{13}\text{C}$  NMR (100 MHz,  $\text{CDCl}_3$ )  $\delta$  196.5, 160.9, 160.8, 160.7, 157.9, 157.8, 157.6, 155.1, 146.4, 145.4, 141.9, 139.4, 135.4, 129.2, 129.0, 128.8, 118.9, 117.4, 113.7, 113.6, 107.6, 105.4, 100.8, 96.4, 94.1, 56.5, 56.0, 55.9, 55.7, 55.6 (2 C), 55.4, 54.0, 49.9, 46.8, 44.7; HRMS (FAB) calcd for  $\text{C}_{43}\text{H}_{42}\text{O}_9^+$  [ $\text{M}^+$ ] 702.7882, found 702.2816.

**Deprotected Ketone S14.** Permethylated ketone **S13** (0.230 g, 0.327 mmol, 1.0 equiv) was dissolved in a minimal amount of  $\text{CH}_2\text{Cl}_2$  (1 mL), transferred to a sealable reaction vessel, and then  $\text{BBr}_3$  (1.0 M in  $\text{CH}_2\text{Cl}_2$ , 13.0 mL, 13.0 mmol, 40 equiv) was added quickly in a single portion at 25 °C. The resulting reddish-brown reaction mixture was then heated at 70 °C for 5 d. Upon completion, the reaction contents were cooled to 25 °C and quenched with the addition of saturated aqueous  $\text{NaHCO}_3$  (20 mL). After stirring the resultant biphasic mixture for an additional 10 min at 25 °C, the reaction contents were poured into water (20 mL), extracted with  $\text{EtOAc}$  ( $5 \times 40$  mL), dried ( $\text{MgSO}_4$ ), filtered, and concentrated. The resultant orange oil was purified by flash column chromatography (silica gel,  $\text{CH}_2\text{Cl}_2$ : $\text{MeOH}$ , 10:1 $\rightarrow$ 3:1) to afford the deprotected ketone **S14** (0.185 g, 96% yield) as a yellow amorphous solid. **S14**:  $R_f$  = 0.66 ( $\text{CH}_2\text{Cl}_2$ : $\text{MeOH}$ , 4:1); IR (film)  $\nu_{\text{max}}$  3297, 2978, 2937, 1697, 1596, 1512, 1443, 1358, 1343, 1237, 1159, 1005, 836, 792  $\text{cm}^{-1}$ ;  $^1\text{H}$  NMR (400 MHz, acetone- $d_6$ )  $\delta$  9.32 (s, 1 H), 8.65 (br s, 4 H), 8.06 (br s, 2H), 7.19 (d,  $J$  = 8.4 Hz, 2 H), 7.01 (d,  $J$  = 2.0 Hz, 2 H), 6.84 (d,  $J$  = 8.8 Hz, 2 H), 6.70 (d,  $J$  = 8.4 Hz, 2 H), 6.66 (t,  $J$  = 2.2 Hz, 1 H), 6.59 (d,  $J$  = 2.0 Hz, 1 H), 6.56 (d,  $J$  = 8.4 Hz, 2 H), 6.37 (s, 1 H), 6.11 (d,  $J$  = 2.0 Hz, 1 H), 4.32 (d,  $J$  = 1.6 Hz, 1 H), 4.16 (s, 1 H), 3.71 (s, 1 H), 3.41 (s, 1 H);  $^{13}\text{C}$  NMR (100 MHz, acetone- $d_6$ )  $\delta$  200.6, 159.6, 158.5, 158.4, 155.8, 155.4, 154.7, 153.2, 146.8, 145.6, 141.9, 137.3, 134.0, 128.9, 128.2, 124.9, 114.9, 114.7, 114.4, 108.3, 107.5, 103.2, 101.6, 101.1, 56.3, 49.2, 46.6, 46.0; HRMS (FAB) calcd for  $\text{C}_{35}\text{H}_{26}\text{O}_9^+$  [ $\text{M}^+$ ] 590.5755, found 590.1580.

**Perbenzylated Ketone S15.** Solid  $\text{K}_2\text{CO}_3$  (0.430 g, 3.11 mmol, 40 equiv),  $\text{BnBr}$  (0.576 g, 3.368 mmol, 43 equiv) and  $n\text{-Bu}_4\text{NI}$  (0.058 g, 0.157 mmol, 2.0 equiv) were added sequentially to a solution of the deprotected ketone **S14** (0.046 g, 0.078 mmol, 1.0 equiv) in dry acetone (1 mL) at 25 °C. The resultant reaction mixture was then heated at 70 °C for 15 h. Upon completion, the reaction contents were cooled to 25 °C, quenched with the addition of saturated  $\text{NH}_4\text{Cl}$  (5 mL), poured into water (5 mL), and extracted with  $\text{EtOAc}$  ( $3 \times 10$  mL). The combined organic layers were dried ( $\text{MgSO}_4$ ), filtered, and concentrated. The resultant crude orange oil was purified by flash column chromatography (silica gel, hexanes: $\text{EtOAc}$ , 10:1 $\rightarrow$ 5:1) to afford perbenzylated ketone **S15** (0.080 g, 78% yield) as a yellow oil. **S15**:  $R_f$  = 0.65 (silica gel, hexanes: $\text{EtOAc}$ , 7:3); IR (film)  $\nu_{\text{max}}$  3031, 2927, 1661, 1588, 1508, 1454, 1377, 1295, 1244, 1156, 1110, 1083, 1061, 1028, 833, 736, 696  $\text{cm}^{-1}$ ;  $^1\text{H}$  NMR (300 MHz,  $\text{CDCl}_3$ )  $\delta$  7.49 (d,  $J$  = 1.6 Hz, 1 H), 7.39–7.29 (m, 37 H), 7.23–7.12 (m, 13 H), 7.02–6.99 (m, 5 H), 6.95 (d,  $J$  = 8.8 Hz, 2 H), 6.85 (d,  $J$  = 8.0 Hz, 2 H), 6.76 (d,  $J$  = 8.8 Hz, 2 H), 6.72 (d,  $J$  = 7.2 Hz, 2 H), 6.68–6.74 (m, 2 H), 6.66–6.65 (m, 2 H), 6.64 (d,  $J$  = 1.6 Hz, 1 H), 6.32 (s, 1 H), 6.14 (d,  $J$  = 2.0 Hz, 1 H), 5.08 (s, 2 H), 4.98–4.95 (m, 5 H), 4.91–4.87 (m, 6 H), 4.83–4.62 (m, 6 H), 4.40 (d,  $J$  = 1.6 Hz, 1 H), 3.90 (s, 1 H), 3.43 (br s, 1 H);  $^{13}\text{C}$  NMR (100 MHz,  $\text{CDCl}_3$ )  $\delta$  196.6, 159.9, 159.6, 159.4, 157.2, 157.0, 156.5, 153.6, 146.4, 145.5, 142.4, 139.6, 137.5, 137.4, 137.1 (2 C), 137.0, 136.6, 136.5 (2 C), 130.4, 129.1, 128.7 (2 C), 128.6, 128.3, 128.2, 128.1, 128.0 (2 C), 127.9, 127.8, 127.7 (2 C), 127.6, 127.5, 127.2, 127.1, 126.5, 119.7, 117.6, 114.8, 114.4, 106.7, 102.6, 99.2, 96.2, 70.5 (2 C), 70.3 (2 C), 70.0, 69.9, 68.7, 56.7, 50.0, 46.8, 44.2; MS (FAB) calcd for  $\text{C}_{91}\text{H}_{74}\text{O}_9^+$  [ $\text{M}+\text{H}^+$ ] 1311.5, found 1311.4.

**Aldehyde 35.** To a slurry of Me<sub>3</sub>SI (0.032 g, 0.156 mmol, 20 equiv) in THF (1 mL) at 0 °C was added *n*-BuLi (1.6 M in THF, 0.080 mL, 0.128 mmol, 16 equiv) dropwise over the course of 2 min, and the reaction mixture was stirred at 0 °C for an additional 2 min. A solution of ketone **S15** (0.011 g, 0.008 mmol, 1.0 equiv) in THF (1 mL) was then added dropwise over the course of 2 min at 0 °C, and the resultant solution was stirred for an additional 1 h at 0 °C.<sup>3</sup> Upon completion, the reaction contents were quenched at 0 °C with the addition of saturated aqueous NH<sub>4</sub>Cl (5 mL), poured into water (5 mL), and extracted with EtOAc (3 × 5 mL). The combined organic layers were dried (MgSO<sub>4</sub>), filtered, and concentrated to give the desired crude epoxide as a yellow oil. Next, the crude epoxide was immediately dissolved in benzene (0.5 mL) and solid ZnI<sub>2</sub> (0.080 g, 0.251 mmol, 31 equiv) was added at 25 °C.<sup>8</sup> The resultant reaction mixture was stirred at 25 °C for 1 h. Upon completion, the reaction contents were quenched with water (5 mL) and extracted with EtOAc (3 × 5 mL). The combined organic layers were then dried (MgSO<sub>4</sub>), filtered, and concentrated. The resultant crude yellow oil was purified by flash column chromatography (silica gel, hexanes:EtOAc, 10:1→3:1) to afford aldehyde **35** as an amorphous solid (0.010 g, 94% yield) as a single diastereoisomer. **35**: *R*<sub>f</sub> = 0.61 (silica gel, hexanes:EtOAc, 7:3); IR (film)  $\nu_{\text{max}}$  3031, 2922, 1724, 1594, 1509, 1454, 1378, 1300, 1243, 1157, 1124, 1060, 1027, 830, 737, 697 cm<sup>-1</sup>; <sup>1</sup>H NMR (400 MHz, CDCl<sub>3</sub>)  $\delta$  9.52 (s, 1 H), 7.45 – 7.27 (m, 36 H), 7.22 – 7.13 (m, 2 H), 7.15 (d, *J* = 7.6 Hz, 2 H), 7.08 (d, *J* = 8.8 Hz, 2 H), 6.89 (d, *J* = 8.8 Hz, 2 H), 6.72 (d, *J* = 1.6 Hz, 1 H), 6.69 (d, *J* = 7.6 Hz, 2 H), 6.67 (s, 3 H), 6.54 (t, *J* = 2.0 Hz, 1 H), 6.42 (d, *J* = 2.0 Hz, 2 H), 6.40 (d, *J* = 1.6 Hz, 1 H), 5.44 (s, 1 H), 5.03 – 4.85 (m, 15 H), 4.68 (d, *J* = 11.6 Hz, 1 H), 4.60 (d, *J* = 11.6 Hz, 1 H), 4.43 (s, 1 H), 4.33 (s, 1 H), 3.58 (s, 1H), 3.42 (s, 1 H); <sup>13</sup>C NMR (100 MHz, CDCl<sub>3</sub>)  $\delta$  199.7, 160.1, 157.9, 157.1 (2 C), 155.3, 154.2, 146.7, 146.2, 140.9, 139.9, 137.3, 137.1, 136.8, 136.6, 135.6, 129.0, 128.9, 128.7 (3 C), 128.6, 128.3 (2 C), 128.2, 128.1 (2 C), 128.0 (2 C), 127.8, 127.7, 127.6, 127.5, 127.2, 117.8, 115.3, 114.7, 114.4, 108.7, 102.8, 100.9, 98.9, 96.7, 70.9, 70.6, 70.4, 70.2 (2 C), 69.9, 69.8, 57.2, 55.8, 50.0, 46.8, 45.9; MS (FAB) calcd for C<sub>92</sub>H<sub>77</sub>O<sub>9</sub><sup>+</sup> [*M*+H<sup>+</sup>] 1324.6, found 1325.4.

**Carasiphenol B (19).** To a solution of aldehyde **35** (0.045 g, 0.034 mmol, 1.0 equiv) in THF (4 mL) at 25 °C was added 4-benzyloxyphenylmagnesium bromide (**S7**, 1.0 M in THF, 0.200 mL, 0.2 mmol, 6 equiv), and the resultant solution was stirred for 1 h at 25 °C. Upon completion, the reaction contents were quenched with saturated aqueous NH<sub>4</sub>Cl (10 mL), poured into water (5 mL), and extracted with EtOAc (3 × 10 mL). The combined organic layers were then dried (MgSO<sub>4</sub>), filtered, and concentrated. The resultant colorless crude oil was purified by flash column chromatography (silica gel, hexanes:EtOAc, 5:1→1:1) to afford alcohol **S16** as a white solid (0.035 g, 68% yield) and as a single diastereomer. **S16**: *R*<sub>f</sub> = 0.50 (silica gel, hexanes:EtOAc, 7:3); IR (film)  $\nu_{\text{max}}$  3493, 3062, 3031, 2922, 2866, 1592, 1509, 1454, 1377, 1298, 1241, 1173, 1117, 1061, 1026, 829, 736, 697 cm<sup>-1</sup>; <sup>1</sup>H NMR (400 MHz, CDCl<sub>3</sub>)  $\delta$  7.43 (d, *J* = 7.2 Hz, 5 H), 7.36–7.32 (m, 30 H), 7.20 (d, *J* = 8.8 Hz, 2 H), 7.20–7.08 (m, 10 H), 7.03 (d, *J* = 8.4 Hz, 2 H), 6.86 (d, *J* = 8.4 Hz, 2 H), 6.72 (d, *J* = 1.6 Hz, 1 H), 6.69 (d, *J* = 8.4 Hz, 2 H), 6.68 (d, *J* = 8.4 Hz, 2 H), 6.63 (d, *J* = 8.8 Hz, 2 H), 6.48 (d, *J* = 2.4 Hz, 2 H), 6.47 (s, 1 H), 6.38 (t, *J* = 2.4 Hz, 1 H), 6.28 (d, *J* = 1.6 Hz, 1 H), 5.45 (d, *J* = 10.0 Hz, 1 H), 5.13–5.00 (m, 7 H), 4.91 (s, 4 H), 4.86 (s, 3 H), 4.74–4.69 (m, 5 H), 4.58 (d, *J* = 11.6 Hz, 1 H), 4.38 (s, 1 H), 3.67 (s, 1 H), 3.39 (s, 1 H), 3.19 (br s, 1 H); <sup>13</sup>C NMR (100 MHz, CDCl<sub>3</sub>)  $\delta$  159.9, 159.5, 157.9, 157.2, 157.1 (2 C), 147.7, 145.7, 140.3, 137.5, 137.4, 137.2 (2 C), 137.1, 137.0, 136.9, 136.0, 129.8, 129.0, 128.9, 128.7 (2 C), 128.6, 128.4, 128.3 (2 C), 128.1, 128.0, 127.8 (2 C), 127.7, 127.6 (3 C), 127.5, 127.3, 126.8, 118.3, 117.9, 114.7, 114.5 (2 C), 108.5, 103.7, 100.3, 97.2, 73.9, 71.2, 70.6, 70.2, 70.0 (2 C), 69.9, 69.8, 55.8, 52.0, 50.7, 47.2, 46.6, 29.8; MS (FAB) calcd for C<sub>105</sub>H<sub>88</sub>O<sub>10</sub><sup>+</sup> [*M*<sup>+</sup>]

1509.8, found 1508.4. This intermediate alcohol (6.0 mg, 0.004 mmol, 1.0 equiv) was dissolved in a mixture of EtOAc:MeOH (1:1, 3 mL) and solid Pd/C (30%, 5.0 mg) was added. H<sub>2</sub> was then bubbled directly through the stirred reaction mixture for 30 min.<sup>4</sup> Once complete, some additional MeOH was added to replace any evaporated solvent to rereach ~3 mL reaction volume and the reaction mixture was stirred under H<sub>2</sub> (balloon) for 2 h. H<sub>2</sub> was bubbled through the stirred reaction mixture again for 30 min and the reaction mixture again was refilled with MeOH to account for lost solvent. The reaction was stirred under H<sub>2</sub> at 25 °C for 12 h.<sup>5</sup> Upon completion, the reaction solution was filtered through simple filtration paper to remove Pd/C and washed with MeOH (2 mL).<sup>6</sup> Next, Amberlite (IR-12OH, 0.100 g, pre-washed with MeOH 5 times) was added to the filtrate and the resultant mixture was stirred at 25 °C for 1 h. When this operation was complete, the solution was filtered through simple filtration paper to remove the Amberlite, and the filtrate was concentrated directly to afford carasiphenol B (**19**, 2.4 mg, 89%) as a white solid, with a scrupulously pure analytical sample obtained by reverse-phase HPLC<sup>7</sup> (Shimadzu Epic C18, 5 $\mu$ , 250  $\times$  9.6 mm, retention time = 10.3 min, 55% water in MeOH). **19**: R<sub>f</sub> = 0.74 (silica gel, CH<sub>2</sub>Cl<sub>2</sub>:MeOH, 4:1); IR (film)  $\nu_{\text{max}}$  3323, 2968, 2925, 2853, 1696, 1606, 1512, 1453, 1366, 1333, 1238, 1165, 1120, 1084, 1013, 834 cm<sup>-1</sup>; <sup>1</sup>H NMR (400 MHz, CDCl<sub>3</sub>)  $\delta$  8.43 (s, 1 H), 8.22 (s, 2 H), 8.12 (s, 1 H), 8.06 (s, 1 H), 7.94 (s, 1 H), 7.88 (s, 1 H), 7.57 (s, 1 H), 7.25 (d, *J* = 8.8 Hz, 2 H), 7.16 (d, *J* = 8.4 Hz, 2 H), 6.84 (d, *J* = 8.4 Hz, 2 H), 6.79 (d, *J* = 8.4 Hz, 2 H), 6.61 (d, *J* = 2.0 Hz, 1 H), 6.61 (d, *J* = 8.4 Hz, 2 H), 6.49 (d, *J* = 8.4 Hz, 2 H), 6.43 (d, *J* = 2.4 Hz, 2 H), 6.35 (t, *J* = 2.0 Hz, 1 H), 6.19 (s, 1 H), 6.14 (d, *J* = 2.0 Hz, 1 H), 5.44 (d, *J* = 6.0 Hz, 1 H), 4.97 (d, *J* = 6.4 Hz, 1 H), 4.26 (d, *J* = 1.6 Hz, 1 H), 4.06 (s, 1 H), 3.56 (s, 1 H), 3.43 (s, 1 H); <sup>13</sup>C NMR (100 MHz, CDCl<sub>3</sub>)  $\delta$  159.9, 159.8, 158.6, 158.2, 157.9, 156.2, 156.1, 153.5, 153.4, 148.5, 144.1, 138.8, 135.2, 134.3, 130.0, 129.3, 128.6, 127.1, 117.8, 116.1, 115.7, 115.4, 114.8, 107.4, 103.9, 102.0, 101.8, 95.9, 94.4, 56.8, 56.4, 49.6, 47.8, 46.7; HRMS (FAB) calcd for C<sub>42</sub>H<sub>32</sub>O<sub>9</sub><sup>+</sup> [M<sup>+</sup>] 680.6981, found 680.2025. All spectroscopic data for **19** match that reported by Hu and co-workers. For a direct comparison, see Table S3.

### Total Synthesis of Ampelopsin G (**18**).

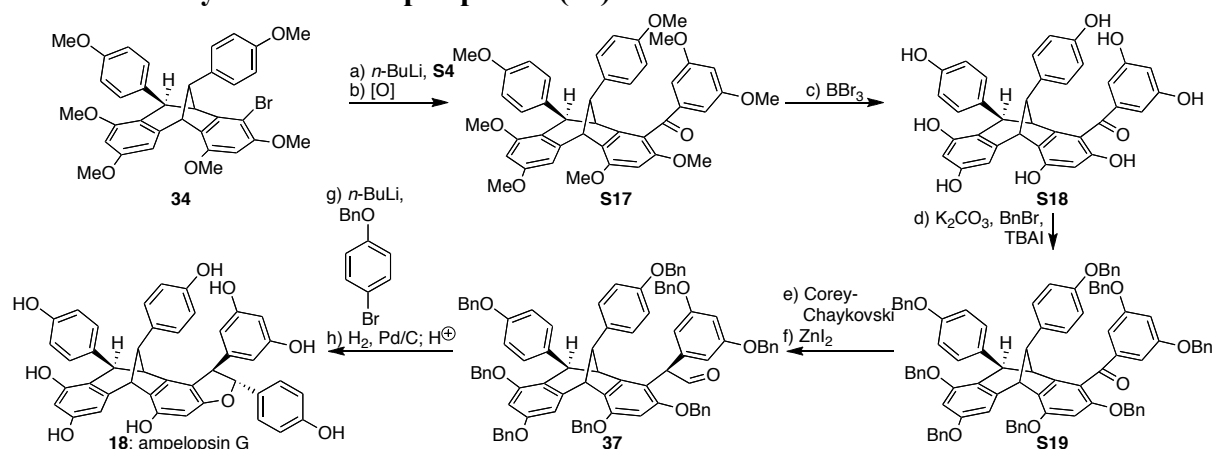

**Figure S15.** Total synthesis of ampelopsin G (**18**) from monobromide **34**. Reagents and Conditions: a) *n*-BuLi (1.6 M in THF, 1.1 equiv), THF, -78 °C, 10 min, then **S4** (2.5 equiv), THF, -78 °C, 2 h, -78 °C to 25 °C, 1.5 h, 83%; b) NaHCO<sub>3</sub> (16.0 equiv), DMP (4.3 equiv), CH<sub>2</sub>Cl<sub>2</sub>, 25 °C, 10 min, 89%; c) BBr<sub>3</sub> (1.0 M in CH<sub>2</sub>Cl<sub>2</sub>, 117.0 equiv), CH<sub>2</sub>Cl<sub>2</sub>, sealed tube, 70 °C, 7 d, 44%; d) K<sub>2</sub>CO<sub>3</sub> (40 equiv), BnBr (43 equiv), *n*-Bu<sub>4</sub>NI (2.0 equiv), acetone, 70 °C, 12 h, 86%; e) Me<sub>3</sub>SiI (3.5 equiv), KO<sup>t</sup>Bu (1.0 M in THF, 3.0 equiv), THF:DMSO 1:3, 12 °C, 1 min, then **S19**, 12 °C, 15 min; f) ZnI<sub>2</sub> (4.0 equiv), benzene, 25 °C, 1 h, 73% (over 2 steps); g) 4-benzyloxyphenyl bromide (20.0 equiv), *n*-BuLi (1.6 M in THF, 18 equiv), THF, -78 °C, 20 min, then **S37**, -78 °C, 15 min, -78 °C to 25 °C, 2 min, 76%; h) H<sub>2</sub>, 30% Pd/C, EtOAc:MeOH (1:1) to MeOH, 25 °C, 12 h, then Amberlite IR-12OH, 25 °C, 1 h, 69% (over 2 steps).

**Permethylated Ketone S17.** Monobromide **34** (0.360 g, 0.583 mmol, 1.0 equiv) was azeotroped with benzene (3  $\times$  10 mL), dissolved in THF (20 mL), and then cooled to -78 °C. Next, *n*-BuLi (1.6 M in THF, 0.4 mL, 0.6413 mmol, 1.1 equiv) was added dropwise over the

course of 5 min and the reaction mixture was stirred at  $-78\text{ }^{\circ}\text{C}$  for an additional 10 min, ultimately yielding a solution with a slight yellow color. A solution of benzene-azeotroped ( $3 \times 5\text{ mL}$ ) 3,5-dimethoxybenzaldehyde (**S4**, 0.242 g, 1.457 mmol, 2.5 equiv) in THF (4 mL) was then added dropwise over 5 min at  $-78\text{ }^{\circ}\text{C}$ . After stirring the resulting solution for an additional 2 h at  $-78\text{ }^{\circ}\text{C}$ , the reaction was then allowed to slowly warm to  $25\text{ }^{\circ}\text{C}$  over the course of 1.5 h. Upon completion, the reaction contents were quenched with saturated aqueous  $\text{NH}_4\text{Cl}$  (30 mL), and extracted with EtOAc ( $4 \times 20\text{ mL}$ ). The combined organic layers were then dried ( $\text{MgSO}_4$ ), filtered, and concentrated. The resultant crude yellow oil was purified by flash column chromatography (silica gel, hexanes:EtOAc, 4:1 $\rightarrow$ 1:1) to afford the desired alcohol as a mixture of diastereomers (0.340 g, 83% yield) as a white solid. The mixture of diastereomers (0.340 g, 0.482 mmol, 1.0 equiv) was dissolved in  $\text{CH}_2\text{Cl}_2$  (10 mL) and solid  $\text{NaHCO}_3$  (0.632 g, 7.578 mmol, 16 equiv) and Dess–Martin periodinane (0.876 g, 2.064 mmol, 4.3 equiv) were added sequentially at  $25\text{ }^{\circ}\text{C}$ . The resultant reaction mixture was stirred at  $25\text{ }^{\circ}\text{C}$  for 10 min. Upon completion, the reaction contents were quenched with saturated aqueous  $\text{Na}_2\text{SO}_3$  (30 mL) and the resulting slurry was stirred for an additional 20 min at  $25\text{ }^{\circ}\text{C}$  before being poured into water (50 mL) and extracted with EtOAc ( $3 \times 50\text{ mL}$ ). The combined organic layers were then washed with saturated aqueous  $\text{NaHCO}_3$  (50 mL) and brine (50 mL), dried ( $\text{MgSO}_4$ ), filtered, and concentrated to afford ketone **S17** (0.303 g, 89% yield) as an off-white foam. **S17**:  $R_f = 0.42$  (silica gel, hexanes:EtOAc, 1:1); IR (film)  $\nu_{\text{max}}$  2937, 2836, 1735, 1659, 1599, 1511, 1461, 1318, 1300, 1249, 1206, 1156, 1034, 829,  $738\text{ cm}^{-1}$ ;  $^1\text{H}$  NMR (400 MHz,  $\text{CDCl}_3$ )  $\delta$  6.96 (d,  $J = 8.4\text{ Hz}$ , 2 H), 6.89 (d,  $J = 2.0\text{ Hz}$ , 2 H), 6.85 (d,  $J = 8.8\text{ Hz}$ , 2 H), 6.71 (d,  $J = 8.8\text{ Hz}$ , 2 H), 6.64 (d,  $J = 8.8\text{ Hz}$ , 2 H), 6.63 (t,  $J = 2.0\text{ Hz}$ , 1 H), 6.53 (d,  $J = 2.0\text{ Hz}$ , 1 H), 6.26 (d,  $J = 2.4\text{ Hz}$ , 1 H), 6.19 (s, 1 H), 4.36 (br s, 1 H), 4.21 (s, 1 H), 3.84 (s, 3 H), 3.82 (s, 3 H), 3.74 (s, 9 H), 3.68 (s, 3 H), 3.67 (s, 1 H), 3.60 (s, 3 H), 3.44 (s, 1 H), 3.42 (s, 3 H);  $^{13}\text{C}$  NMR (100 MHz,  $\text{CDCl}_3$ )  $\delta$  196.5, 160.8, 159.8, 159.0, 158.5, 157.8, 157.4, 156.3, 145.4, 145.3, 141.5, 139.1, 135.0, 129.1, 128.8, 128.6, 118.8, 116.1, 113.5, 113.3, 107.0, 105.7, 103.1, 97.1, 94.3, 56.2, 55.6, 55.5 (2 C), 55.3 (2 C), 55.2, 54.8, 49.7, 49.4, 45.1; HRMS (FAB) calcd for  $\text{C}_{43}\text{H}_{42}\text{O}_9^+$  [ $\text{M}^+$ ] 702.7882, found 702.2835.

**Deprotected Ketone S18.** Permethylated ketone **S17** (0.300 g, 0.430 mmol, 1.0 equiv) was dissolved in a minimal amount of  $\text{CH}_2\text{Cl}_2$  (1.0 mL), transferred to a sealable reaction vessel, and then  $\text{BBr}_3$  (1.0 M in  $\text{CH}_2\text{Cl}_2$ , 50 mL, 50 mmol, 117 equiv) was added quickly in a single portion at  $25\text{ }^{\circ}\text{C}$ . The resulting reddish-brown reaction mixture was then heated to  $70\text{ }^{\circ}\text{C}$  for 1 week. Upon completion, the reaction contents were cooled to  $25\text{ }^{\circ}\text{C}$  and quenched with the addition of  $\text{H}_2\text{O}$  (100 mL). After stirring the biphasic mixture for an additional 10 min at  $25\text{ }^{\circ}\text{C}$ , the reaction contents were poured into water (30 mL), extracted with EtOAc ( $5 \times 40\text{ mL}$ ), dried ( $\text{MgSO}_4$ ), filtered, and concentrated. The resultant orange oil was purified by preparative thin layer chromatography (silica gel,  $\text{CH}_2\text{Cl}_2$ :MeOH, 6:1) to afford the deprotected ketone **S18** (0.110 g, 44% yield) as a yellow foam, along with a monomethylated congener (0.140 g, 54% yield); this latter material could be recycled through a reprotection/deprotection sequence. **S18**:  $R_f = 0.68$  (silica gel,  $\text{CH}_2\text{Cl}_2$ :MeOH, 4:1); IR (film)  $\nu_{\text{max}}$  3338, 3027, 2971, 2924, 1697, 1595, 1512, 1453, 1448, 1364, 1340, 1297, 1229, 1171, 1142,  $867\text{ cm}^{-1}$ ;  $^1\text{H}$  NMR (400 MHz, acetone)  $\delta$  6.90–6.85 (m, 4 H), 6.74–6.63 (m, 7 H), 6.52 (br s, 1 H), 6.24 (s, 1 H), 6.21 (d,  $J = 2.0\text{ Hz}$ , 1 H), 4.27 (s, 1 H), 4.20 (s, 1 H), 3.64 (s, 1 H), 3.60 (s, 1 H);  $^{13}\text{C}$  NMR (100 MHz, acetone)  $\delta$  198.2, 160.3, 158.5, 156.8, 156.2, 155.2, 155.1, 146.8, 145.6, 142.5, 137.1, 133.4, 128.8, 128.3, 128.2, 114.8, 114.7, 114.5, 114.4, 112.2, 107.2, 106.0, 104.9, 101.6, 101.1, 55.7, 48.8, 48.3, 44.7; HRMS (FAB) calcd for  $\text{C}_{35}\text{H}_{26}\text{O}_9^-$  [ $\text{M}^-$ ] 590.58, found 589.01

**Perbenzylated Ketone S19.** Solid K<sub>2</sub>CO<sub>3</sub> (1.00 g, 7.237 mmol, 39 equiv), BnBr (1.48 g, 8.408 mmol, 45 equiv) and *n*-Bu<sub>4</sub>NI (0.140 g, 0.191 mmol, 1.1 equiv) were added sequentially to a solution of the deprotected ketone **S18** (0.110 g, 0.187 mmol, 1.0 equiv) in dry acetone (4 mL) at 25 °C. The resultant reaction mixture was heated at 70 °C for 12 h. Upon completion, the reaction contents were cooled to 25 °C, quenched with the addition of saturated aqueous NH<sub>4</sub>Cl (5 mL) and extracted with EtOAc (3 × 10 mL). The combined organic layers were dried (MgSO<sub>4</sub>), filtered, and concentrated. The resultant crude orange oil was purified by preparative thin layer chromatography (silica gel, hexanes:EtOAc, 3:2) to afford perbenzylated ketone **S19** (0.210 g, 86% yield) as a yellow oil. **S19**: R<sub>f</sub> = 0.63 (silica gel, hexanes:EtOAc, 7:3); IR (film) ν<sub>max</sub> 3031, 2868, 1659, 1599, 1508, 1453, 1295, 1241, 1175, 1147, 1058, 1026, 736, 696 cm<sup>-1</sup>; <sup>1</sup>H NMR (400 MHz, CDCl<sub>3</sub>) 7.43–7.29 (m, 32 H), 7.16–7.06 (m, 9 H), 6.96 (d, *J* = 8.8 Hz, 2 H), 6.96 (d, *J* = 2.4 Hz, 2 H), 6.85 (d, *J* = 8.8 Hz, 2 H), 6.84–6.82 (m, 2 H), 6.75 (d, *J* = 8.8 Hz, 2 H), 6.83 (t, *J* = Hz, 1 H), 6.66 (d, *J* = 7.2 Hz, 2 H), 6.63 (d, *J* = 2.4 Hz, 1 H), 6.43 (d, *J* = 2.0 Hz, 1 H), 6.22 (s, 1 H), 5.05 (s, 4 H), 5.02 (s, 1 H), 4.98 (s, 1 H), 4.91 (s, 4 H), 4.86 (s, 2 H), 4.72–4.60 (m, 4 H), 4.54 (br s, 1 H), 4.30 (s, 1 H), 3.81 (s, 1 H), 3.65 (s, 1 H); <sup>13</sup>C NMR (100 MHz, CDCl<sub>3</sub>) δ 196.6, 160.1, 158.7, 158.3, 157.9, 157.1, 155.6, 146.4, 145.5, 142.4, 139.6, 137.6, 137.3, 137.0, 136.9 (2 C), 136.6, 135.3, 130.4, 129.2, 128.8, 128.7 (2 C), 128.6, 128.3, 128.2, 128.1 (2 C), 128.0, 127.9, 127.8, 127.7, 127.6, 127.5, 127.3, 126.9 (2 C), 119.2, 116.6, 114.6, 114.5, 107.8, 107.0, 103.7, 99.1, 96.7, 70.7, 70.3 (2 C), 70.2, 70.0 (2 C), 69.5, 54.5, 50.1, 49.7, 45.6; MS (FAB) calcd for C<sub>91</sub>H<sub>74</sub>O<sub>9</sub><sup>+</sup> [M+H<sup>+</sup>] 1311.5, found 1312.2.

**Aldehyde 37.** To a slurry of Me<sub>3</sub>Si (4 mg, 0.019 mmol, 3.5 equiv) in THF/DMSO 1:3 (2 mL) at 12 °C was added KO<sup>*t*</sup>Bu (1.0 M in THF, 0.016 mL, 0.016 mmol, 3.0 equiv) dropwise over the course of 1 min, and the reaction mixture was stirred at 12 °C for an additional 1 min. A solution of ketone **S19** (7 mg, 0.005 mmol, 1.0 equiv) in DMSO (0.25 mL) was then added dropwise over the course of 1 min, and the resultant solution was stirred for an additional 15 min at 12 °C.<sup>3</sup> Upon completion, the reaction contents were quenched at 12 °C with the addition of water (5 mL) and brine (5 mL), and extracted with diethyl ether (3 × 5 mL). The combined organic layers were washed with water (5 × 20 mL) and brine (3 × 20 mL), dried (MgSO<sub>4</sub>), filtered, and concentrated to give the desired crude epoxide as a yellow oil. Next, the crude epoxide was immediately dissolved in benzene (0.75 mL) and solid ZnI<sub>2</sub> (7 mg, 0.02 mmol, 4 equiv) was added at 25 °C.<sup>8</sup> The resultant solution was stirred at 25 °C for 1 h. Upon completion, the reaction contents were quenched with water (5 mL) and extracted with EtOAc (3 × 10 mL). The combined organic layers were then washed with water (5 mL) and brine (5 mL), dried (MgSO<sub>4</sub>), filtered, and concentrated. The resulting crude yellow oil was purified by preparative thin layer chromatography (EtOAc:hexanes, 7:3) to afford aldehyde **37** and its diastereomer (epimeric at the α carbon of the aldehyde, 5.2 mg, 73% yield) as a mixture of diastereomers (1:1 based on <sup>1</sup>H NMR) and as a white solid. The pure aldehydes were obtained by reverse-phase HPLC (Shimadzu Epic C18, 5μ, 250 × 9.6 mm; retention time for **37** = 39.0 min, the diastereomer of **37** = 36.0 min, 5% H<sub>2</sub>O in MeCN). **37**: R<sub>f</sub> = 0.61 (silica gel, hexanes:EtOAc, 7:3); IR (film) ν<sub>max</sub> 3031, 2918, 1718, 1602, 1508, 1454, 1378, 1314, 1242, 1147, 1110, 1063, 1027, 737, 696 cm<sup>-1</sup>; <sup>1</sup>H NMR (400 MHz, CDCl<sub>3</sub>) δ 9.94 (s, 1H), 7.43–7.24 (m, 25 H), 7.18–7.10 (m, 6 H), 6.91 (d, *J* = 8.4 Hz, 2 H), 6.68 (d, *J* = 7.2 Hz, 2 H), 6.65 (d, *J* = 8.8 Hz, 2 H), 6.61 (d, *J* = 2.0 Hz, 1 H), 6.56 (d, *J* = 8.4 Hz, 2 H), 6.50–6.48 (m, 2 H), 6.43 (d, *J* = 2.4 Hz, 1 H), 6.32 (s, 1 H), 5.03–4.78 (m, 13 H), 4.70 (dd, *J* = 28 Hz, 16.4 Hz, 2 H), 4.34 (s, 1 H), 4.25 (s, 1 H), 3.80 (s, 1 H), 3.56 (s, 1 H); <sup>13</sup>C NMR (100 MHz, CDCl<sub>3</sub>) δ 199.9, 160.3, 158.7, 158.5, 157.3, 157.0, 156.3, 153.8, 146.6, 145.7,

139.6, 139.4, 137.5, 137.3, 136.9, 136.5, 134.9, 130.0, 129.0, 128.9, 128.8, 128.7 (3 C), 128.6, 128.2, 128.1, 128.0 (2 C), 127.9, 127.8, 127.7, 127.6, 127.5 (2 C), 127.1, 116.2, 115.5, 114.8, 114.3, 114.1, 108.1, 105.6, 103.7, 101.3, 99.1, 97.4, 71.1, 70.3, 70.2, 70.0 (2 C), 69.8, 69.6, 59.1, 53.5, 50.7, 49.6, 45.5; MS (FAB) calcd for  $C_{92}H_{77}O_9^+$   $[M+H]^+$  1324.6, found 1325.7. The other diastereomer of **37**:  $R_f$  = 0.61 (silica gel, hexanes:EtOAc, 7:3); IR (film)  $\nu_{\max}$  3063, 3032, 1721, 1603, 1508, 1454, 1379, 1313, 1297, 1241, 1176, 1155, 1111, 1063, 1027, 734, 696  $cm^{-1}$ ;  $^1H$  NMR (400 MHz,  $CDCl_3$ )  $\delta$  9.87 (s, 1H), 7.45–7.28 (m, 25 H), 7.24–7.22 (m, 6 H), 7.13–7.04 (m, 5 H), 6.91 (d,  $J$  = 8.8 Hz, 2 H), 6.88 (d,  $J$  = 8.8 Hz, 2 H), 6.80 (d,  $J$  = 1.6 Hz, 2 H), 6.76 (d,  $J$  = 8.8 Hz, 2 H), 6.63 (d,  $J$  = 2.0 Hz, 1 H), 6.57 (d,  $J$  = 7.2 Hz, 2 H), 6.39 (d,  $J$  = 8.8 Hz, 2 H), 6.35 (d,  $J$  = 2.4 Hz, 1 H), 6.29 (s, 1 H), 6.28 (t,  $J$  = 2.0 Hz, 1 H), 5.04–4.90 (m, 9 H), 4.81–4.73 (m, 3H), 4.68–4.64 (m, 3 H), 4.53 (dd,  $J$  = 23.2, 11.6 Hz, 2 H), 4.31 (s, 1 H), 3.90 (s, 1 H), 3.82 (s, 1 H), 3.58 (s, 1 H);  $^{13}C$  NMR (100 MHz,  $CDCl_3$ )  $\delta$  200.0, 160.1, 158.3, 158.2, 157.0, 156.9, 156.5, 153.4, 145.9, 145.8, 139.4, 139.1, 137.3, 137.2, 137.1, 136.8, 136.4, 135.2, 130.4, 128.9, 128.6, 128.5 (3 C), 128.4, 128.0, 127.9 (2 C), 127.8 (2 C), 127.7, 127.6, 127.4 (2 C), 127.3 (3 C), 127.1, 126.6, 116.2, 115.5, 114.5, 114.4, 107.8, 103.6, 101.0, 99.0, 97.3, 71.0, 70.0 (2 C), 69.9, 69.8 (2 C), 69.2, 58.2, 54.8, 50.1, 49.2, 44.7; MS (FAB) calcd for  $C_{92}H_{77}O_9^+$   $[M+H]^+$  1324.6, found 1325.7.

**Ampelopsin G (18).** To a degassed solution of 4-benzyloxyphenyl bromide (0.020 g, 0.12 mmol, 20 equiv) in THF (0.5 mL) at  $-78^\circ C$  was added *n*-BuLi (1.6 M in THF, 0.074 mL, 0.11 mmol, 18 equiv) dropwise over the course of 1 min, and the resultant solution was stirred at  $-78^\circ C$  for 20 min. A degassed solution of aldehyde **37** (7.5 mg, 0.006 mmol, 1.0 equiv) in THF (0.5 mL) was added dropwise to the above solution over the course of 2 min at  $-78^\circ C$ . The reaction was stirred at  $-78^\circ C$  for 15 min, before being removed from the ice bath for 2 min. Upon completion, the reaction contents were quenched with water (5 mL) and extracted with EtOAc ( $3 \times 5$  mL). The combined organic layers were then dried ( $MgSO_4$ ), filtered and concentrated. The resultant yellow crude oil was purified by preparative thin layer chromatography (EtOAc:hexanes, 3:7) to afford the desired alcohol as a mixture of diastereomers (6.5 mg, 76% yield) and as a white solid. This intermediate alcohol mixture (6.5 mg, 0.004 mmol, 1.0 equiv) was dissolved in a mixture of EtOAc:MeOH (1:1, 2 mL) and solid Pd/C (30%, 4.0 mg) was added.  $H_2$  was then bubbled directly through the stirred reaction mixture for 30 min.<sup>4</sup> Once complete, some additional MeOH was added to replace any evaporated solvent to rereach  $\sim 3$  mL reaction volume and the reaction mixture was stirred under  $H_2$  (balloon) at  $25^\circ C$  for 12 h.<sup>5</sup> Upon completion, the reaction solution was filtered through simple filtration paper to remove Pd/C and washed with MeOH (2 mL).<sup>6</sup> Next, Amberlite (IR-12OH, 0.100 g pre-washed with MeOH 5 times) was added to the filtrate and the resultant mixture was stirred at  $25^\circ C$  for 20 min. When this operation was complete, the solution was filtered through simple filtration paper to remove the Amberlite (IR-12OH, 0.100 g pre-washed with MeOH five times), and the filtrate was concentrated directly to afford ampelopsin G (**18**, 2.0 mg, 69%) as a white solid, with a scrupulously pure analytical sample obtained by reverse-phase HPLC<sup>7</sup> (Shimadzu Epic C18, 5 $\mu$ , 250  $\times$  9.6 mm, retention time = 10.5 min, 55% water in MeOH). **18**:  $R_f$  = 0.62 (silica gel,  $CH_2Cl_2$ :MeOH, 7:3); IR (film)  $\nu_{\max}$  3352, 2923, 2853, 1694, 1662, 1611, 1513, 1449, 1365, 1258, 1158, 1083, 1015, 834, 800  $cm^{-1}$ ;  $^1H$  NMR (400 MHz, acetone- $d_6$ )  $\delta$  8.37 (s, 1 H), 8.27 (s, 1 H), 7.99 (s, 1 H), 7.90 (s, 1 H), 7.88 (s, 1 H), 7.28 (s, 1 H), 7.26 (d,  $J$  = 8.4 Hz, 2 H), 7.01 (d,  $J$  = 8.4 Hz, 2 H), 6.86 (d,  $J$  = 8.4 Hz, 2 H), 6.72 (d,  $J$  = 8.4 Hz, 2 H), 6.68 (d,  $J$  = 8.4 Hz, 2 H), 6.62 (d,  $J$  = 8.8 Hz, 2 H), 6.56 (d,  $J$  = 2.0 Hz, 2 H), 6.50 (d,  $J$  = 2.0 Hz, 1 H), 6.37 (t,  $J$  = 2.0 Hz, 1 H), 6.19 (d,  $J$  = 2.4 Hz, 1 H), 6.11 (s, 1 H), 5.62 (d,  $J$  = 8.0

Hz, 1 H), 4.58 (d,  $J = 7.6$  Hz, 1 H), 4.18 (s, 1 H), 4.12 (s, 1 H), 3.56 (s, 1 H), 3.18 (s, 1 H);  $^{13}\text{C}$  NMR (100 MHz, acetone- $d_6$ )  $\delta$  161.2, 160.0, 159.9, 158.2, 157.9, 157.3, 156.1, 156.0, 153.3, 147.8, 146.0, 142.5, 138.1, 134.6, 133.5, 130.0, 129.6, 128.9, 128.2, 118.8, 116.2, 116.1, 115.7, 115.6, 115.5, 113.3, 108.1, 108.0, 105.8, 102.4, 102.0, 96.3, 94.2, 57.7, 52.0, 51.5, 50.5, 45.0; HRMS (FAB) calcd for  $\text{C}_{42}\text{H}_{32}\text{O}_9^+ [\text{M}^+]$  680.7, found 680.4. All spectroscopic data for **18** match that reported by Oshima and co-workers. For a direct comparison, see Table S4.

**Unnatural Isomer of Ampelopsin G** (obtained from the diastereomer of **37**):  $R_f = 0.64$  (silica gel,  $\text{CH}_2\text{Cl}_2$ :MeOH, 7:3); IR (film)  $\nu_{\text{max}}$  3363, 2919, 2853, 1737, 1653, 1559, 1444, 1231, 821  $\text{cm}^{-1}$ ;  $^1\text{H}$  NMR (400 MHz, acetone- $d_6$ )  $\delta$  8.41 (s, 1 H), 8.24 (s, 2 H), 8.02 (s, 1 H), 7.99 (s, 1 H), 7.97 (s, 1 H), 7.91 (s, 1 H), 7.17 (d,  $J = 8.8$  Hz, 2 H), 6.84 (d,  $J = 8.8$  Hz, 2 H), 6.78 (d,  $J = 8.4$  Hz, 2 H), 6.61 (d,  $J = 8.4$  Hz, 2 H), 6.49 (d,  $J = 2.4$  Hz, 1 H), 6.45 (d,  $J = 2.0$  Hz, 2 H), 6.36 (t,  $J = 2.0$  Hz, 1 H), 6.16 (d,  $J = 2.0$  Hz, 1 H), 6.16 (s, 1 H), 5.49 (d,  $J = 6.4$  Hz, 1 H), 4.44 (d,  $J = 6.8$  Hz, 1 H), 4.14 (s, 1 H), 3.76 (s, 1 H), 3.64 (s, 1 H), 3.24 (s, 1 H);  $^{13}\text{C}$  NMR (100 MHz, acetone- $d_6$ )  $\delta$  161.4, 160.1, 160.0, 158.3, 157.8, 157.2, 156.4, 156.0, 153.2, 146.9 (2 C), 142.4, 138.4, 135.3, 133.7, 130.1, 129.4, 129.3, 128.1, 119.2, 116.1 (2 C), 115.7, 115.6, 115.5, 113.7, 107.9, 105.6, 102.5 (2 C), 101.9, 96.2, 94.3, 57.6, 55.7, 51.1, 50.2, 44.2; HRMS (FAB) calcd for  $\text{C}_{42}\text{H}_{32}\text{O}_9^- [\text{M}^-]$  680.7, found 680.4.

### Total Synthesis of Vaticanol C (**38**).

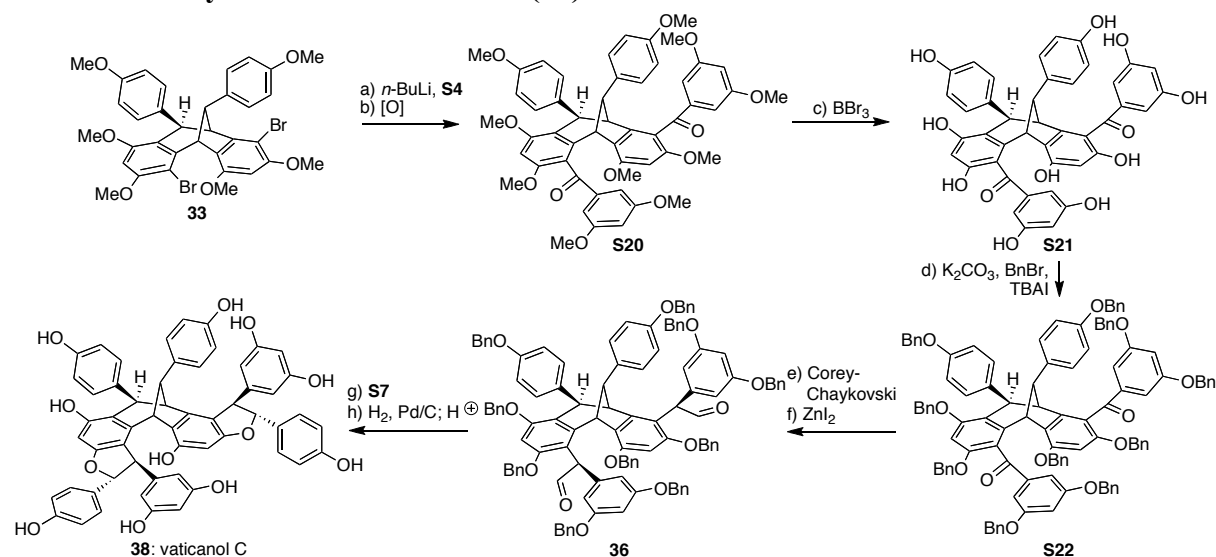

**Figure S16.** Total synthesis of vaticanol C (**38**) from dibromide **33**. Reagents and Conditions: a)  $n\text{-BuLi}$  (1.6 M in THF, 2.2 equiv), THF,  $-78^\circ\text{C}$ , 4 min, then **S4** (6.0 equiv), THF,  $-78^\circ\text{C}$ , 2 h,  $-78^\circ\text{C}$  to  $25^\circ\text{C}$ , 3 h, 86%; b)  $\text{NaHCO}_3$  (10.0 equiv), DMP (3.0 equiv),  $\text{CH}_2\text{Cl}_2$ ,  $25^\circ\text{C}$ , 1 h, 99%; c)  $\text{BBr}_3$  (1.0 M in  $\text{CH}_2\text{Cl}_2$ , 205 equiv),  $\text{CH}_2\text{Cl}_2$ , sealed tube,  $100^\circ\text{C}$ , 14 d, 60%; d)  $\text{K}_2\text{CO}_3$  (60.0 equiv),  $\text{BnBr}$  (60.0 equiv),  $n\text{-BuN}_4\text{I}$  (2.5 equiv), acetone,  $70^\circ\text{C}$ , 24 h, 85%; e)  $n\text{-BuLi}$  (1.6 M in THF, 15.0 equiv),  $\text{Me}_3\text{Si}$  (20.0 equiv), THF,  $0^\circ\text{C}$ , 3 min, then **S22**,  $0^\circ\text{C}$ , 30 min, then  $25^\circ\text{C}$ , 6 h; f)  $\text{ZnI}_2$  (10.0 equiv), benzene,  $25^\circ\text{C}$ , 1 h, 52% (over 2 steps); g) **S7** (1.0 M in THF, 10 equiv), THF,  $25^\circ\text{C}$ , 1 h, 83%; h)  $\text{H}_2$ , 30%  $\text{Pd/C}$ ,  $\text{EtOAc}:\text{MeOH}$  (1:1) to  $\text{MeOH}$ ,  $25^\circ\text{C}$ , 12 h, then Amberlite IR-120H,  $25^\circ\text{C}$ , 1 h, 68% (over 2 steps).

**Permethylated Ketone S20.** Dibromide **33** (0.260 g, 0.375 mmol, 1.0 equiv) was azeotroped with benzene ( $3 \times 5$  mL), dissolved in THF (10 mL), and then cooled to  $-78^\circ\text{C}$ . Next,  $n\text{-BuLi}$  (1.6 M in THF, 0.515 mL, 0.824 mmol, 2.2 equiv) was added dropwise over the course of 4 min and the reaction mixture was stirred at  $-78^\circ\text{C}$  for an additional 4 min, ultimately yielding a solution with a slight yellow color. A solution of benzene-azeotroped ( $3 \times 5$  mL) 3,5-dimethoxybenzaldehyde (**S4**, 0.374 g, 2.25 mmol, 6.0 equiv) in THF (1.5 mL) was then added dropwise over the course of 5 min at  $-78^\circ\text{C}$ . After stirring the resultant solution for an additional 2 h at  $-78^\circ\text{C}$ , the reaction was then allowed to slowly warm to  $25^\circ\text{C}$  over the course of 3 h. Upon completion, the reaction contents were quenched with saturated aqueous  $\text{NH}_4\text{Cl}$

(10 mL), poured into water (5 mL) and extracted with EtOAc (4 × 15 mL). The combined organic layers were then dried (MgSO<sub>4</sub>), filtered, and concentrated. The resultant crude product was purified by flash column chromatography (silica gel, hexanes:EtOAc, 10:1→1:1) to afford the desired diol (0.275 g, 86% yield) as a colorless oil and as a mixture of diastereomers based on <sup>1</sup>H NMR analysis. This alcohol mixture (0.275 g, 0.321 mmol, 1.0 equiv) was then dissolved in CH<sub>2</sub>Cl<sub>2</sub> (10 mL) and solid NaHCO<sub>3</sub> (0.270 g, 3.21 mmol, 10 equiv) and Dess–Martin periodinane (0.406 g, 0.963 mmol, 3.0 equiv) were added sequentially at 25 °C. The resultant reaction mixture was stirred at 25 °C for 1 h. Upon completion, the reaction contents were quenched with saturated aqueous Na<sub>2</sub>SO<sub>3</sub> (15 mL) and the resultant slurry was stirred for an additional 20 min at 25 °C before being poured into water (15 mL) and extracted with EtOAc (3 × 20 mL). The combined organic layers were then washed with saturated aqueous NaHCO<sub>3</sub> (10 mL) and brine (10 mL), dried (MgSO<sub>4</sub>), filtered, and concentrated to afford ketone **S20** (0.274 g, 99% yield) as a colorless oil. **S20**: R<sub>f</sub> = 0.50 (silica gel, hexanes:EtOAc, 1:1); IR (film) ν<sub>max</sub> 2961, 1726, 1665, 1590, 1510, 1459, 1375, 1299, 1246, 1204, 1155, 1076, 1030, 830, 731, 669 cm<sup>-1</sup>; <sup>1</sup>H NMR (400 MHz, CDCl<sub>3</sub>) δ 7.07 (br s, 2 H), 7.03 (d, *J* = 8.6 Hz, 2 H), 6.92 (d, *J* = 2.2 Hz, 2 H), 6.74 (d, *J* = 8.4 Hz, 2 H), 6.73 (d, *J* = 8.6 Hz, 2 H), 6.68 (t, *J* = 2.2 Hz, 1 H), 6.64 (t, *J* = 2.1 Hz, 1 H), 6.57 (d, *J* = 8.4 Hz, 2 H), 6.30 (s, 1 H), 6.01 (s, 1 H), 4.52 (br s, 1 H), 4.49 (s, 1 H), 3.83 (s, 6 H), 3.75 (s, 6 H), 3.74 (s, 3 H), 3.73 (s, 1 H), 3.64 (s, 6 H), 3.57 (s, 3 H), 3.50 (s, 3 H), 3.43 (s, 1 H), 3.07 (br s, 3 H); <sup>13</sup>C NMR (100 MHz, CDCl<sub>3</sub>) δ 196.6, 196.2, 160.8, 160.7, 160.6, 158.6, 157.6, 157.5, 157.4, 156.2, 145.8, 144.3, 141.8, 141.4, 139.1, 134.6, 129.1, 128.7, 128.6, 118.4, 118.1, 117.3, 113.3, 106.9, 105.5, 105.3, 93.9, 93.2, 56.0, 55.8, 55.7, 55.6 (2 C), 55.4, 55.2, 55.1, 54.0, 53.9, 49.4, 45.3; HRMS (FAB) calcd for C<sub>52</sub>H<sub>50</sub>O<sub>12</sub><sup>+</sup> [*M*<sup>+</sup>] 866.3302, found 866.3306.

**Deprotected Ketone S21.** Permethyated ketone **S20** (0.270 g, 0.317 mmol, 1.0 equiv) was dissolved in a minimal amount of CH<sub>2</sub>Cl<sub>2</sub> (2 mL), transferred to a sealable reaction vessel, and then BBr<sub>3</sub> (1.0 M in CH<sub>2</sub>Cl<sub>2</sub>, 65.0 mL, 65.0 mmol, 205 equiv) was added in a single portion. The resulting black reaction mixture was then heated at 100 °C for 14 d. Upon completion, the reaction contents were cooled to 25 °C, quenched with the addition of water (100 mL), and extracted with EtOAc (5 × 40 mL). The resultant crude product mixture was purified by preparative thin layer chromatography (silica gel, CH<sub>2</sub>Cl<sub>2</sub>:MeOH, 3:1) to afford the desired deprotected ketone **S21** (0.144 g, 60% yield) as an orange oil along with a monomethylated congener (0.066 g, 28% yield); this latter material could be recycled through a reprotection/deprotection sequence. **S21**: R<sub>f</sub> = 0.25 (silica gel, CH<sub>2</sub>Cl<sub>2</sub>:MeOH, 3:1); IR (film) ν<sub>max</sub> 3001, 2936, 2836, 1662, 1589, 1511, 1460, 1426, 1316, 1299, 1249, 1204, 1180, 1156, 1110, 1081, 1065, 1033, 964, 926, 830 cm<sup>-1</sup>; <sup>1</sup>H NMR (400 MHz, acetone-*d*<sub>6</sub>) δ 9.95 (br s, 1 H), 9.46 (br s, 1 H), 8.88 (br s, 1 H), 8.61 (br s, 2 H), 8.48 (br s, 2 H), 8.42 (br s, 1 H), 8.04 (br s, 1 H), 7.98 (br s, 1 H), 6.99–6.94 (m, 4 H), 6.77 (d, *J* = 2.2 Hz, 2 H), 6.70 (d, *J* = 8.6 Hz, 4 H), 6.63 (t, *J* = 2.2 Hz, 1 H), 6.56 (t, *J* = 2.2 Hz, 1 H), 6.54 (d, *J* = 8.6 Hz, 2 H), 6.35 (s, 1 H), 6.16 (s, 1 H), 4.36 (d, *J* = 1.3 Hz, 1 H), 4.20 (s, 1 H), 3.62 (s, 1 H), 3.52 (s, 1 H); <sup>13</sup>C NMR (100 MHz, acetone-*d*<sub>6</sub>) δ 201.6, 198.4, 160.8, 159.9, 159.5, 159.4, 157.2, 157.0, 156.4, 156.2, 148.3, 145.8, 143.1, 142.8, 138.0, 134.0, 129.7, 129.1, 127.1, 116.2, 115.7, 115.6, 115.3, 109.2, 108.5, 108.3, 107.2, 103.0, 102.2, 55.2, 49.6, 47.1, 46.0; HRMS (FAB) calcd for C<sub>42</sub>H<sub>30</sub>O<sub>12</sub><sup>+</sup> [*M*<sup>+</sup>] 726.1737, found 726.1713.

**Perbenzylated Ketone S22.** Solid K<sub>2</sub>CO<sub>3</sub> (1.00 g, 7.29 mmol, 60 equiv), BnBr (1.25 g, 7.29 mmol, 60 equiv) and *n*-Bu<sub>4</sub>NI (0.110 g, 0.305 mmol, 2.5 equiv) were added sequentially to a solution of the deprotected ketone **S21** (0.090 g, 0.122 mmol, 1.0 equiv) in dry acetone (2 mL)

at 25 °C. The resultant reaction mixture was then heated at 70 °C for 24 h. Upon completion, the reaction contents were cooled to 25 °C, quenched with the addition of water (30 mL), and extracted with EtOAc (3 × 25 mL). The combined organic layers were then dried (MgSO<sub>4</sub>), filtered, and concentrated. The resultant crude product mixture was purified by flash column chromatography (silica gel, hexanes:EtOAc, 20:1→5:1) to afford perbenzylated ketone **S22** (0.170 g, 85% yield) as a yellow oil. **S22**: *R<sub>f</sub>* = 0.62 (silica gel, hexanes:EtOAc, 2:1); IR (film)  $\nu_{\text{max}}$  3062, 3031, 2923, 1658, 1588, 1508, 1453, 1415, 1377, 1295, 1242, 1178, 1154, 1108, 1058, 1027, 910, 840, 737, 697 cm<sup>-1</sup>; <sup>1</sup>H NMR (400 MHz, CDCl<sub>3</sub>)  $\delta$  7.44–7.40 (m, 2 H), 7.38–7.28 (m, 19 H), 7.27–7.22 (m, 8 H), 7.19–7.08 (m, 16 H), 7.04–6.95 (m, 4 H), 6.90 (d, *J* = 2.2 Hz, 2 H), 6.88–6.81 (m, 6 H), 6.73 (d, *J* = 8.6 Hz, 2 H), 6.71 (t, *J* = 2.2 Hz, 1 H), 6.89–6.65 (m, 5 H), 6.34 (s, 1 H), 6.00 (s, 1 H), 5.00 (br s, 2 H), 4.93–4.84 (m, 9 H), 4.83–4.79 (m, 3 H), 4.77 (d, *J* = 11.8 Hz, 2 H), 4.72–4.62 (m, 4 H), 4.54 (d, *J* = 11.8 Hz, 1 H), 4.43 (d, *J* = 11.8 Hz, 1 H), 3.87 (s, 1 H), 3.57 (s, 1 H); <sup>13</sup>C NMR (100 MHz, CDCl<sub>3</sub>)  $\delta$  196.5, 196.3, 159.9, 159.5, 159.4, 157.6, 157.0, 156.9, 156.3, 155.0, 146.7, 144.4, 142.3, 142.2, 139.6, 137.4, 137.1, 136.7, 136.6, 136.5, 136.4, 136.3, 134.8, 130.3, 129.0, 128.6, 128.5 (3 C), 128.4, 128.2 (2 C), 128.1 (2 C), 128.0, 127.9, 127.8 (2 C), 127.6, 127.5 (2 C), 127.4, 127.3, 126.9 (2 C), 126.7, 126.4, 119.3, 118.9, 117.7, 114.5, 114.3, 107.5, 106.9, 106.7, 96.7, 96.3, 70.4, 70.3, 70.1 (3 C), 69.8, 69.7, 69.0, 54.0, 49.7, 45.6, 44.8; MS (FAB) calcd for C<sub>112</sub>H<sub>90</sub>O<sub>12</sub><sup>+</sup> [M+H<sup>+</sup>] 1627.6, found 1627.8.

**Aldehyde 36.** To a slurry of Me<sub>3</sub>SI (0.104 g, 0.511 mmol, 20 equiv) in THF (5 mL) at 0 °C was added *n*-BuLi (1.6 M in THF, 0.240 mL, 0.384 mmol, 15.0 equiv) dropwise over the course of 3 min, and the reaction mixture was stirred at 0 °C for additional 3 min. A solution of ketone **S22** (0.050 g, 0.031 mmol, 1.0 equiv) in THF (2 mL) was added dropwise over the course of 3 min at 0 °C, and the resultant solution was stirred for an additional 30 min at 0 °C and then warmed to 25 °C and stirred for another 6 h.<sup>3</sup> Upon completion, the reaction contents were quenched with the addition of saturated aqueous NH<sub>4</sub>Cl (10 mL), poured into water (5 mL) and extracted with EtOAc (3 × 15 mL). The combined organic layers were then dried (MgSO<sub>4</sub>), filtered, and concentrated to give the desired crude epoxide as a light yellow oil. Pressing forward without any additional purification, the crude epoxide was immediately dissolved in benzene (5 mL) and solid ZnI<sub>2</sub> (0.100 g, 0.313 mmol, 10 equiv) was added at 25 °C in a single portion.<sup>8</sup> The resultant reaction mixture was stirred at 25 °C for 1 h. Upon completion, the reaction contents were quenched with water (15 mL) and extracted with EtOAc (3 × 15 mL). The combined organic layers were then dried (MgSO<sub>4</sub>), filtered, and concentrated. The resultant crude product was purified by preparative thin layer chromatography (silica gel, hexanes:EtOAc, 2:1) to afford aldehyde diastereomer **36** (0.013 g, 26% yield) and a second stereoisomer of unknown configuration (0.013 g, 26% yield). Analytical samples were obtained by semi-preparative reverse-phase HPLC (Shimadzu Epic C18, 5 $\mu$ , 250 × 9.6 mm, retention time for **36** = 35 min, other isomer of **36** = 45 min, 5% H<sub>2</sub>O in MeCN). **36**: *R<sub>f</sub>* = 0.53 (silica gel, hexanes:EtOAc, 2:1); IR (film)  $\nu_{\text{max}}$  3031, 2920, 1723, 1593, 1508, 1454, 1379, 1299, 1241, 1156, 1108, 1063, 1027, 830, 736, 697 cm<sup>-1</sup>; <sup>1</sup>H NMR (400 MHz, CDCl<sub>3</sub>)  $\delta$  9.96 (d, *J* = 0.9 Hz, 1 H), 9.51 (s, 1 H), 7.41–7.35 (m, 13 H), 7.34–7.27 (m, 28 H), 7.21–7.14 (m, 8 H), 7.06 (d, *J* = 8.6 Hz, 2 H), 6.86 (d, *J* = 8.6 Hz, 2 H), 6.68 (d, *J* = 8.6 Hz, 2 H), 6.56 (t, *J* = 2.2 Hz, 1 H), 6.54–6.51 (m, 3 H), 6.47 (d, *J* = 8.6 Hz, 2 H), 6.43–6.41 (m, 3 H), 6.37–6.35 (m, 3 H), 5.39 (s, 1 H), 4.98 (s, 2 H), 4.97 (d, *J* = 12.0 Hz, 1 H), 4.95–4.92 (m, 3 H), 4.90–4.89 (m, 3 H), 4.88 (s, 2 H), 4.86 (s, 2 H), 4.84 (s, 2 H), 4.80 (d, *J* = 10.5 Hz, 1 H), 4.73–4.66 (m, 4 H), 4.60 (d, *J* = 11.7 Hz, 1 H), 4.42 (s, 1 H), 4.39 (s, 1 H), 3.53 (s, 1 H), 3.51 (s, 1 H); <sup>13</sup>C NMR (100 MHz, CDCl<sub>3</sub>)  $\delta$  199.7, 199.5, 160.2, 160.1, 157.8, 157.2, 156.8, 156.4, 155.1, 153.7, 147.2, 145.5, 140.9, 139.5,

139.3, 137.3, 137.1, 137.0, 136.7, 136.6, 136.4, 136.3, 136.1, 134.5, 129.1, 128.8, 128.6 (2 C), 128.5, 128.4, 128.2 (2 C), 128.0 (2 C), 127.9 (2 C), 127.8, 127.7, 127.6, 127.5, 127.4 (2 C), 127.1, 117.6, 115.4, 115.3, 114.7 (2 C), 114.1 (2 C), 108.6, 108.1, 101.1, 100.1, 96.9, 96.8, 71.0, 70.8, 70.4, 70.1 (2 C), 70.0, 69.7, 69.6, 59.1, 57.2, 52.1, 49.6, 47.0, 45.6; MS (FAB) calcd for  $C_{114}H_{94}O_{12}^+$   $[M+H]^+$  1655.7, found 1655.8. The other diastereoisomer of **36**:  $R_f$  = 0.58 (silica gel, hexanes:EtOAc, 2:1); IR (film)  $\nu_{\max}$  3062, 3031, 2923, 2854, 1722, 1593, 1508, 1454, 1379, 1299, 1242, 1156, 1109, 1062, 1027, 829, 736, 696  $cm^{-1}$ ;  $^1H$  NMR (400 MHz,  $CDCl_3$ )  $\delta$  9.89 (d,  $J$  = 1.1 Hz, 1 H), 9.59 (s, 1 H), 7.41–7.27 (m, 33 H), 7.25–7.21 (m, 10 H), 7.14–7.05 (m, 5 H), 6.82 (d,  $J$  = 8.6 Hz, 2 H), 6.74 (d,  $J$  = 8.6 Hz, 2 H), 6.70–6.64 (m, 4 H), 6.58 (s, 1 H), 6.56 (s, 1 H), 6.54 (t,  $J$  = 2.2 Hz, 1 H), 6.43 (d,  $J$  = 2.2 Hz, 2 H), 6.40 (d,  $J$  = 2.2 Hz, 2 H), 6.35–6.31 (m, 3 H), 5.45 (s, 1 H), 5.01 (d,  $J$  = 11.0 Hz, 1 H), 4.97 (d,  $J$  = 11.0 Hz, 1 H), 4.96 (s, 1 H), 4.92 (d,  $J$  = 11.9 Hz, 1 H), 4.92 (s, 2 H), 4.89–4.83 (m, 7 H), 4.81 (d,  $J$  = 11.7 Hz, 1 H), 4.79 (d,  $J$  = 11.7 Hz, 2 H), 4.71 (d,  $J$  = 11.7 Hz, 2 H), 4.66 (d,  $J$  = 11.7 Hz, 1 H), 4.53 (d,  $J$  = 11.9 Hz, 1 H), 4.47 (s, 1 H), 4.42 (d,  $J$  = 11.9 Hz, 1 H), 3.96 (s, 1 H), 3.57 (s, 1 H), 3.53 (s, 1 H);  $^{13}C$  NMR (100 MHz,  $CDCl_3$ )  $\delta$ . 200.1, 199.9, 160.2, 160.0, 157.6, 157.0, 156.9, 156.7, 155.0, 153.6, 146.6, 145.7, 140.8, 139.4, 137.3, 137.2, 137.1, 136.9, 136.6, 136.4, 136.3 (2 C), 135.3, 135.0, 129.2, 128.8, 128.7, 128.6, 128.5 (2 C), 128.4, 128.2, 128.0 (2 C), 127.9, 127.8 (2 C), 127.7, 127.4 (2 C), 127.3 (3 C), 126.6, 117.8, 115.6, 115.5, 114.5, 114.4, 108.5, 107.9, 101.2, 100.8, 97.2, 96.9, 71.1, 70.7, 70.6, 70.1, 70.0, 69.9, 69.8, 69.5, 58.2, 57.0, 53.5, 49.3, 46.5, 45.0; MS (FAB) calcd for  $C_{114}H_{94}O_{12}^+$   $[M+H]^+$  1655.7, found 1655.7.

**Vaticanol C (38).** To a solution of aldehyde **36** (5.0 mg, 0.003 mmol, 1.0 equiv) in THF (1 mL) at 25 °C was added 4-benzyloxyphenylmagnesium bromide (**S7**, 1.0 M in THF, 0.030 mL, 0.003 mmol, 10 equiv), and the resultant solution was stirred for 1 h at 25 °C. Upon completion, the reaction contents were quenched with saturated aqueous  $NH_4Cl$  (3 mL), poured into water (3 mL), and extracted with EtOAc (3  $\times$  5 mL). The combined organic layers were then dried ( $MgSO_4$ ), filtered, and concentrated. The resultant crude product mixture was purified by preparative thin layer chromatography (silica gel, hexanes:EtOAc, 2:1) to afford the desired intermediate alcohol (5.0 mg, 83% yield) as a colorless oil and as a complex mixture of diastereomers based on  $^1H$  NMR analysis. Carrying this mixture of diastereomeric alcohols forward, the material (5.0 mg, 0.003 mmol, 1.0 equiv) was dissolved in a mixture of EtOAc:MeOH (1:1, 3 mL) and solid Pd/C (30%, 5 mg) was added.  $H_2$  was then bubbled directly through the stirred reaction mixture for 30 min.<sup>4</sup> Once complete, some additional MeOH was added to replace any evaporated solvent to rereach ~3 mL reaction volume and the reaction mixture was stirred under  $H_2$  (balloon) for 2 h.  $H_2$  was bubbled through the stirred reaction mixture again for 30 min and the reaction mixture again was refilled with MeOH to account for lost solvent. This process was repeated one more time after stirring the reaction under  $H_2$  for 2 h and finally the reaction was stirred under  $H_2$  at 25 °C for 12 h.<sup>5</sup> Upon completion of the reaction, the reaction solution was filtered through simple filtration paper to remove Pd/C and washed with MeOH (2 mL).<sup>6</sup> Next, Amberlite (IR-120H, 0.100 g pre-washed with MeOH five times) was added to the filtrate and the resultant mixture was stirred at 25 °C for 1 h. When this operation was complete, the solution was filtered through simple filtration paper to remove the Amberlite and the filtrate was concentrated directly to afford crude vaticanol C (**35**) as a white solid. This was purified by semi-preparative reverse-phase HPLC<sup>7</sup> (Shimadzu Epic C18, 5 $\mu$ , 250  $\times$  9.6 mm, retention time = 13.5 min, 45% MeOH in  $H_2O$ ) to give vaticanol C (**38**, 1.2 mg, 68% yield) as a white solid. **38**:  $R_f$  = 0.28 (silica gel,  $CH_2Cl_2$ :MeOH, 3:1); IR (film)  $\nu_{\max}$  3354, 2926, 2855, 1660, 1609, 1513, 1452, 1342, 1240, 1159, 1079, 1003, 832  $cm^{-1}$ ;  $^1H$  NMR (400 MHz,

acetone-*d*<sub>6</sub>) δ 8.44 (br s, 2 H), 8.36 (br s, 2 H), 8.26 (br s, 3 H), 7.98 (br s, 1 H), 7.84 (br s, 1 H), 7.51 (br s, 1 H), 7.27 (d, *J* = 8.4 Hz, 2 H), 7.26 (d, *J* = 8.6 Hz, 2 H), 7.04 (d, *J* = 8.6 Hz, 2 H), 6.87 (d, *J* = 8.6 Hz, 2 H), 6.86 (d, *J* = 8.6 Hz, 2 H), 6.68 (d, *J* = 8.6 Hz, 2 H), 6.58 (d, *J* = 2.2 Hz, 2 H), 6.48 (d, *J* = 8.6 Hz, 2 H), 6.43 (d, *J* = 2.2 Hz, 2 H), 6.39 (t, *J* = 2.2 Hz, 1 H), 6.38 (d, *J* = 8.6 Hz, 2 H), 6.36 (t, *J* = 2.2 Hz, 1 H), 6.19 (s, 1 H), 6.15 (s, 1 H), 5.64 (d, *J* = 7.9 Hz, 1 H), 5.46 (d, *J* = 6.6 Hz, 1 H), 4.96 (d, *J* = 6.6 Hz, 1 H), 4.59 (d, *J* = 7.9 Hz, 1 H), 4.20 (s, 1 H), 4.03 (s, 1 H), 3.41 (s, 1 H), 3.14 (s, 1 H); <sup>13</sup>C NMR (150 MHz, acetone-*d*<sub>6</sub>) δ 161.1, 160.1, 160.0, 159.9, 158.3, 157.9, 156.2, 155.9, 153.6, 148.5, 146.1, 144.2, 143.3, 138.4, 134.3 (2 C), 133.6, 130.1, 129.6, 128.7, 128.4, 128.2, 118.7, 117.9, 116.2 (2 C), 115.7, 115.6, 114.8, 108.2, 107.6, 102.5, 102.0, 96.0, 95.9, 94.3, 57.9, 56.9, 51.1, 49.8, 47.7, 45.7; ; HRMS (FAB) calcd for C<sub>56</sub>H<sub>43</sub>O<sub>12</sub>+ [M+H<sup>+</sup>] 906.2755, found 906.2642. All spectroscopic data for **38** match that reported by Tanaka and co-workers. For a direct comparison, see Table S5.

#### **Larger Scale Synthesis of Carasiphenol C (16): on ~50 mg scale**

All reactions were performed as described above if not otherwise stated.

**Deprotected Ketone S5.** Permethylated ketone **S3** (0.510 g, 0.725 mmol, 1.0 equiv); split in two sealable reaction vessels; 70 °C for 2 d. Deprotected ketone **S5** (0.611 g, 84% yield) as an orange oil.

**Perbenzylated Ketone S6.** Deprotected ketone **S5** (0.285 g, 0.483 mmol, 1.0 equiv). Perbenzylated ketone **S6** (0.526 g, 83% yield) as a yellow oil.

**Aldehyde 27.** Ketone **S6** (0.185 g, 0.141 mmol, 1.0 equiv). Aldehyde **27** (0.147 g, 79% yield).

**Alcohol S8.** Aldehyde **27** (0.147 g, 0.014 mmol, 1.0 equiv, 5.5:1 mixture of diastereomers); the crude product was purified by preparative thin layer chromatography (Et<sub>2</sub>O/toluene, 19/1) to afford alcohol **S8** (0.112 g, 90% yield, mixture of diastereomers, 4:1 based on <sup>1</sup>H NMR) as a white solid.

**Carasiphenol C (16).** HPLC grade solvents were used for all operations performed in the final reaction. Alcohol **S8** (55 mg, 0.036 mmol, 1.0 equiv) was dissolved in a mixture of EtOAc/MeOH (1/2, 8 mL), solid Pd/C (10%, 120 mg); 7 h total reaction time (deprotection); crude <sup>1</sup>H NMR of the deprotected alcohol intermediate obtained indicating 100% conversion, ~90% pure crude carasiphenol C (**16**, 25 mg) as a slight orange solid. The reaction was performed two times at this scale and one time on 12 mg scale. In total 55 mg of material containing **16** in at least 90% purity (if not better) have been obtained from this process. <sup>1</sup>H NMR of all three batches of this material, the <sup>13</sup>C spectrum for a portion of the material after 100 scans, and the alcohol precursor to the final cyclization can be found at the very end of the Supporting Information Section.

| <sup>1</sup> H Literature |                    | <sup>1</sup> H Observed |                    |
|---------------------------|--------------------|-------------------------|--------------------|
| Chemical Shift            | Appearance         | Chemical Shift          | Appearance         |
|                           |                    | 8.45                    | s, 1 H             |
|                           |                    | 8.18                    | s, 2 H             |
|                           |                    | 8.05                    | s, 1 H             |
|                           |                    | 8.01                    | s, 2 H             |
|                           |                    | 7.80                    | s, 1 H             |
|                           |                    | 7.80                    | s, 1 H             |
|                           |                    | 7.70                    | s, 1 H             |
| 7.22                      | d, J = 8.5 Hz, 2 H | 7.23                    | d, J = 8.5 Hz, 2 H |
| 6.98                      | d, J = 8.3 Hz, 2 H | 6.98                    | d, J = 8.6 Hz, 2 H |
| 6.86                      | d, J = 8.5 Hz, 2 H | 6.85                    | d, J = 8.6 Hz, 2 H |
| 6.70                      | d, J = 8.3 Hz, 2 H | 6.70                    | d, J = 8.6 Hz, 2 H |
| 6.61                      | d, J = 1.3 Hz, 1 H | 6.61                    | d, J = 1.8 Hz, 1 H |
| 6.44                      | d, J = 8.6 Hz, 2 H | 6.43                    | d, J = 8.6 Hz, 2 H |
| 6.35                      | d, J = 8.4 Hz, 2 H | 6.35                    | d, J = 8.6 Hz, 2 H |
| 6.31                      | d, J = 2.1 Hz, 1 H | 6.30                    | t, J = 2.2 Hz, 1 H |
| 6.25                      | d, J = 2.3 Hz, 1 H | 6.25                    | d, J = 2.2 Hz, 2 H |
| 6.25                      | s, 1 H             | 6.24                    | s, 1 H             |
| 6.17                      | d, J = 1.3 Hz, 1 H | 6.16                    | d, J = 1.8 Hz, 1 H |
| 5.25                      | d, J = 7.5 Hz, 1 H | 5.26                    | d, J = 7.5 Hz, 1 H |
| 4.82                      | d, J = 7.5 Hz, 1 H | 4.83                    | d, J = 7.5 Hz, 1 H |
| 4.61                      | br s, 1 H          | 4.62                    | s, 1 H             |
| 4.51                      | br s, 1 H          | 4.53                    | s, 1 H             |
| 3.66                      | d, J = 5.9 Hz, 1 H | 3.67                    | d, J = 5.9 Hz, 1 H |
| 3.61                      | d, J = 5.9 Hz, 1 H | 3.62                    | d, J = 5.9 Hz, 1 H |

| <sup>13</sup> C Literature | <sup>13</sup> C Observed<br>Recalibrated | <sup>13</sup> C Observed<br>Acetone at 29.8 ppm |
|----------------------------|------------------------------------------|-------------------------------------------------|
| 163.1                      | 163.2                                    | 162.9                                           |
| 160.3                      | 160.5                                    | 160.2                                           |
| 159.6                      | 159.7                                    | 159.4                                           |
| 158.7                      | 158.7                                    | 158.4                                           |
| 156.3                      | 156.7                                    | 156.4                                           |
| 156.2                      | 156.4                                    | 156.1                                           |
| 155.6                      | 155.8                                    | 155.5                                           |
| 150.7                      | 151.2                                    | 150.9                                           |
| 145.8                      | 145.8                                    | 145.5                                           |
| 145.4                      | 145.4                                    | 145.1                                           |
| 138.0                      | 138.0                                    | 137.7                                           |
| 137.0                      | 137.0                                    | 136.7                                           |
| 133.5                      | 133.7                                    | 133.4                                           |
| 129.6                      | 130.9                                    | 130.6                                           |
| 129.4                      | 129.5                                    | 129.2                                           |
| 129.4                      | 129.5                                    | 129.2                                           |
| 129.4                      | 129.2                                    | 128.9                                           |
| 126.1                      | 126.1                                    | 125.8                                           |
| 123.3                      | 123.3                                    | 123.0                                           |
| 116.6                      | 116.7                                    | 116.4                                           |
| 116.5                      | 116.5                                    | 116.2                                           |
| 116.2                      | 116.3                                    | 116.0                                           |
| 115.6                      | 115.7                                    | 115.4                                           |
| 107.8                      | 107.9                                    | 107.6                                           |
| 103.6                      | 103.8                                    | 103.5                                           |
| 102.8                      | 102.9                                    | 102.6                                           |
| 102.6                      | 102.7                                    | 102.4                                           |
| 97.2                       | 97.2                                     | 96.9                                            |
| 95.1                       | 95.1                                     | 94.8                                            |
| 60.4                       | 60.4                                     | 60.1                                            |
| 60.3                       | 60.2                                     | 59.9                                            |
| 57.4                       | 57.5                                     | 57.2                                            |
| 53.7                       | 53.7                                     | 53.4                                            |
| 50.4                       | 50.3                                     | 50.0                                            |

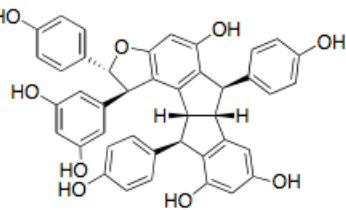

16: carasiphenol C

**Table 1** Comparison of <sup>1</sup>H and <sup>13</sup>C NMR spectra of **16** with reported literature data.

| <sup>1</sup> H Literature |                           |  | <sup>1</sup> H Observed |                           |  |
|---------------------------|---------------------------|--|-------------------------|---------------------------|--|
| Chemical Shift            | Appearance                |  | Chemical Shift          | Appearance                |  |
| 8.41                      | br s, 2 H                 |  | 8.46                    | s, 2 H                    |  |
| 8.11                      | br s, 4 H                 |  | 8.15                    | s, 4 H                    |  |
| 7.88                      | br s, 2 H                 |  | 7.91                    | s, 2 H                    |  |
| 7.75                      | br s, 2 H                 |  | 7.79                    | s, 2 H                    |  |
| 7.21                      | d, <i>J</i> = 8.6 Hz, 4H  |  | 7.25                    | d, <i>J</i> = 8.5 Hz, 4 H |  |
| 6.84                      | d, <i>J</i> = 8.6 Hz, 4 H |  | 6.88                    | d, <i>J</i> = 8.5 Hz, 4 H |  |
| 6.42                      | d, <i>J</i> = 8.8 Hz, 4 H |  | 6.46                    | d, <i>J</i> = 8.6 Hz, 4 H |  |
| 6.34                      | d, <i>J</i> = 8.8 Hz, 4 H |  | 6.38                    | d, <i>J</i> = 8.6 Hz, 4 H |  |
| 6.25                      | t, <i>J</i> = 2.2 Hz, 2 H |  | 6.29                    | t, <i>J</i> = 2.2 Hz, 2 H |  |
| 6.21                      | d, <i>J</i> = 2.2 Hz, 4 H |  | 6.25                    | d, <i>J</i> = 2.2 Hz, 4 H |  |
| 6.20                      | s, 2 H                    |  | 6.24                    | s, 2 H                    |  |
| 5.23                      | d, <i>J</i> = 7.7 Hz, 2 H |  | 5.27                    | d, <i>J</i> = 7.6 Hz, 2 H |  |
| 4.82                      | d, <i>J</i> = 7.7 Hz, 2 H |  | 4.86                    | d, <i>J</i> = 7.6 Hz, 2 H |  |
| 4.57                      | s, 2 H                    |  | 4.61                    | s, 2 H                    |  |
| 3.47                      | s, 2 H                    |  | 3.52                    | s, 2 H                    |  |

  

| <sup>13</sup> C Literature | <sup>13</sup> C Observed<br>Recalibrated | <sup>13</sup> C Observed<br>Acetone at 29.8 ppm |
|----------------------------|------------------------------------------|-------------------------------------------------|
| 162.8                      | 162.8                                    | 163.3                                           |
| 160.0                      | 160.0                                    | 160.5                                           |
| 158.3                      | 158.3                                    | 158.8                                           |
| 156.0                      | 156.0                                    | 156.5                                           |
| 155.4                      | 155.4                                    | 155.9                                           |
| 145.4                      | 145.3                                    | 145.8                                           |
| 145.2                      | 145.1                                    | 145.6                                           |
| 136.5                      | 136.5                                    | 137.0                                           |
| 133.3                      | 133.7                                    | 134.2                                           |
| 129.1                      | 129.1                                    | 129.6                                           |
| 128.7                      | 128.7                                    | 129.2                                           |
| 125.3                      | 125.2                                    | 125.7                                           |
| 116.5                      | 116.5                                    | 117.0                                           |
| 116.2                      | 116.1                                    | 116.6                                           |
| 115.4                      | 115.4                                    | 115.9                                           |
| 107.5                      | 107.5                                    | 108.0                                           |
| 102.3                      | 102.0                                    | 102.5                                           |
| 96.9                       | 96.9                                     | 97.4                                            |
| 94.7                       | 94.7                                     | 95.2                                            |
| 59.4                       | 59.4                                     | 59.9                                            |
| 57.6                       | 57.1                                     | 57.6                                            |
| 49.4                       | 49.4                                     | 49.9                                            |

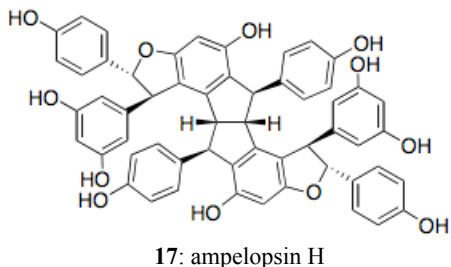

**Table 2** Comparison of <sup>1</sup>H and <sup>13</sup>C NMR spectra of **17** with reported literature data.

| <sup>1</sup> H Literature |                    | <sup>1</sup> H Observed |                    |
|---------------------------|--------------------|-------------------------|--------------------|
| Chemical Shift            | Appearance         | Chemical Shift          | Appearance         |
|                           |                    | 8.43                    | s, 1 H             |
|                           |                    | 8.22                    | s, 2 H             |
|                           |                    | 8.12                    | s, 1 H             |
|                           |                    | 8.06                    | s, 1 H             |
|                           |                    | 7.94                    | s, 1 H             |
|                           |                    | 7.88                    | s, 1 H             |
|                           |                    | 7.57                    | s, 1 H             |
| 7.20                      | d, J = 8.3 Hz, 2 H | 7.25                    | d, J = 8.8 Hz, 2 H |
| 7.10                      | d, J = 8.2 Hz, 2 H | 7.16                    | d, J = 8.4 Hz, 2 H |
| 6.81                      | d, J = 8.5 Hz, 2 H | 6.84                    | d, J = 8.4 Hz, 2 H |
| 6.74                      | d, J = 8.2 Hz, 2 H | 6.79                    | d, J = 8.4 Hz, 2 H |
| 6.56                      | d, J = 1.4 Hz, 1 H | 6.61                    | d, J = 2.0 Hz, 1 H |
| 6.56                      | d, J = 8.6 Hz, 2 H | 6.61                    | d, J = 8.4 Hz, 2 H |
| 6.45                      | d, J = 8.6 Hz, 2 H | 6.49                    | d, J = 8.4 Hz, 2 H |
| 6.37                      | d, J = 1.8 Hz, 1 H | 6.43                    | d, J = 2.4 Hz, 2 H |
| 6.31                      | t, J = 1.8 Hz, 1 H | 6.35                    | t, J = 2.0 Hz, 1 H |
| 6.15                      | s, 1 H             | 6.19                    | s, 1 H             |
| 6.09                      | d, J = 1.1 Hz, 1 H | 6.14                    | d, J = 2.0 Hz, 1 H |
| 5.38                      | d, J = 6.3 Hz, 1 H | 5.44                    | d, J = 6.0 Hz, 1 H |
| 4.93                      | d, J = 6.3 Hz, 1 H | 4.97                    | d, J = 6.4 Hz, 1 H |
| 4.20                      | bs, 1 H            | 4.26                    | d, J = 1.6 Hz, 1 H |
| 4.01                      | s, 1 H             | 4.06                    | s, 1 H             |
| 3.51                      | s, 1 H             | 3.56                    | s, 1 H             |
| 3.37                      | bs, 1 H            | 3.43                    | s, 1 H             |

| <sup>13</sup> C Literature | <sup>13</sup> C Observed<br>Recalibrated | <sup>13</sup> C Observed<br>Acetone at 29.8 ppm |
|----------------------------|------------------------------------------|-------------------------------------------------|
| 160.1                      | 160.1                                    | 159.9                                           |
| 160.0                      | 160.0                                    | 159.8                                           |
| 158.5                      | 158.8                                    | 158.6                                           |
| 158.1                      | 158.4                                    | 158.2                                           |
| 158.1                      | 158.1                                    | 157.9                                           |
| 156.4                      | 156.5                                    | 156.3                                           |
| 156.3                      | 156.3                                    | 156.1                                           |
| 153.7                      | 153.7                                    | 153.5                                           |
| 148.7                      | 148.7                                    | 148.5                                           |
| 144.4                      | 144.3                                    | 144.1                                           |
| 139.0                      | 139.0                                    | 138.8                                           |
| 135.4                      | 135.4                                    | 135.2                                           |
| 134.4                      | 134.6                                    | 134.4                                           |
| 130.2                      | 130.2                                    | 130.0                                           |
| 129.6                      | 129.5                                    | 129.3                                           |
| 128.9                      | 128.8                                    | 128.6                                           |
| 127.0                      | 127.3                                    | 127.1                                           |
| 118.0                      | 118.0                                    | 117.8                                           |
| 116.4                      | 116.3                                    | 116.1                                           |
| 116.0                      | 115.9                                    | 115.7                                           |
| 115.7                      | 115.6                                    | 115.4                                           |
| 115.0                      | 115.0                                    | 114.8                                           |
| 107.6                      | 107.6                                    | 107.4                                           |
| 104.0                      | 104.1                                    | 103.9                                           |
| 102.2                      | 102.2                                    | 102.0                                           |
| 102.0                      | 102.0                                    | 101.8                                           |
| 96.0                       | 96.1                                     | 95.9                                            |
| 94.7                       | 94.6                                     | 94.4                                            |
| 56.9                       | 57.0                                     | 56.8                                            |
| 56.8                       | 56.6                                     | 56.4                                            |
| 49.9                       | 49.8                                     | 49.6                                            |
| 48.1                       | 48.0                                     | 47.8                                            |
| 46.9                       | 46.9                                     | 46.7                                            |

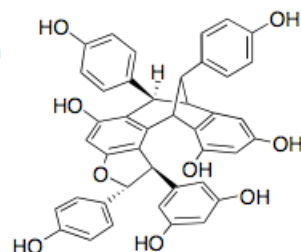

19: carasiphenol B

**Table 3** Comparison of <sup>1</sup>H and <sup>13</sup>C NMR spectra of **38** with reported literature data.

| <sup>1</sup> H Literature<br>Chemical Shift | <sup>1</sup> H Literature<br>Appearance | <sup>13</sup> C Literature | <sup>13</sup> C Observed<br>Recalibrated | <sup>13</sup> C Observed<br>Acetone at 29.8 ppm |
|---------------------------------------------|-----------------------------------------|----------------------------|------------------------------------------|-------------------------------------------------|
|                                             |                                         | 163.6                      | 161.6                                    | 161.2                                           |
|                                             |                                         | 160.4                      | 160.4                                    | 160.0                                           |
|                                             |                                         | 160.4                      | 160.3                                    | 159.9                                           |
|                                             |                                         | 158.6                      | 158.6                                    | 158.2                                           |
|                                             |                                         | 158.3                      | 158.3                                    | 157.9                                           |
|                                             |                                         | 157.7                      | 157.7                                    | 157.3                                           |
|                                             |                                         | 156.5                      | 156.5                                    | 156.1                                           |
| 7.24                                        | d, J = 8.5 Hz, 2 H                      | 156.5                      | 156.4                                    | 156.0                                           |
| 6.99                                        | d, J = 7.5 Hz, 2 H                      | 153.7                      | 153.7                                    | 153.3                                           |
| 6.84                                        | d, J = 7.5 Hz, 2 H                      | 148.2                      | 148.2                                    | 147.8                                           |
| 6.70                                        | d, J = 8.5 Hz, 2 H                      | 146.3                      | 146.4                                    | 146.0                                           |
| 6.66                                        | d, J = 7.5 Hz, 2 H                      | 142.9                      | 142.9                                    | 142.5                                           |
| 6.60                                        | d, J = 8.5 Hz, 2 H                      | 138.5                      | 138.5                                    | 138.1                                           |
| 6.54                                        | d, J = 2.0 Hz, 2 H                      | 134.9                      | 135.0                                    | 134.6                                           |
| 6.48                                        | d, J = 2.0 Hz, 1 H                      | 133.8                      | 133.9                                    | 133.5                                           |
| 6.35                                        | t, J = 2.0 Hz, 1 H                      | 130.4                      | 130.4                                    | 130.0                                           |
| 6.18                                        | d, J = 2.0 Hz, 1 H                      | 130.0                      | 130.0                                    | 129.6                                           |
| 6.10                                        | s, 1 H                                  | 129.3                      | 129.3                                    | 128.9                                           |
| 5.60                                        | d, J = 8.0 Hz, 1 H                      | 128.5                      | 128.6                                    | 128.2                                           |
| 4.55                                        | d, J = 8.0 Hz, 1 H                      | 119.2                      | 119.2                                    | 118.8                                           |
| 4.15                                        | br d, J = 1.0 Hz, 1 H                   | 116.5                      | 116.6                                    | 116.2                                           |
| 4.09                                        | bs, 1 H                                 | 116.5                      | 116.5                                    | 116.1                                           |
| 3.53                                        | bs, 1 H                                 | 116.1                      | 116.1                                    | 115.7                                           |
| 3.15                                        | bs, 1 H                                 | 116.0                      | 116.0                                    | 115.6                                           |
|                                             | <sup>1</sup> H Observed                 | 116.0                      | 115.9                                    | 115.5                                           |
|                                             | Chemical Shift                          | 113.7                      | 113.7                                    | 113.3                                           |
|                                             | <sup>1</sup> H Observed                 | 108.5                      | 108.5                                    | 108.1                                           |
| 8.37                                        | s, 1 H                                  | 108.5                      | 108.4                                    | 108.0                                           |
| 8.27                                        | s, 1 H                                  | 106.2                      | 106.2                                    | 105.8                                           |
| 7.99                                        | s, 1 H                                  | 102.8                      | 102.8                                    | 102.4                                           |
| 7.90                                        | s, 1 H                                  | 102.4                      | 102.4                                    | 102.0                                           |
| 7.88                                        | s, 1 H                                  | 96.6                       | 96.7                                     | 96.3                                            |
| 7.28                                        | s, 1 H                                  | 94.6                       | 94.6                                     | 94.2                                            |
| 7.26                                        | d, J = 8.4 Hz, 2 H                      | 58.1                       | 58.1                                     | 57.7                                            |
| 7.01                                        | d, J = 8.4 Hz, 2 H                      | 52.4                       | 52.4                                     | 52.0                                            |
| 6.86                                        | d, J = 8.4 Hz, 2 H                      | 51.0                       | 51.9                                     | 51.5                                            |
| 6.72                                        | d, J = 8.4 Hz, 2 H                      | 50.9                       | 50.9                                     | 50.5                                            |
| 6.68                                        | d, J = 8.4 Hz, 2 H                      | 45.4                       | 45.4                                     | 45.0                                            |
| 6.62                                        | d, J = 8.8 Hz, 2 H                      |                            |                                          |                                                 |
| 6.56                                        | d, J = 2.0 Hz, 2 H                      |                            |                                          |                                                 |
| 6.50                                        | d, J = 2.0 Hz, 1 H                      |                            |                                          |                                                 |
| 6.37                                        | t, J = 2.0 Hz, 1 H                      |                            |                                          |                                                 |
| 6.19                                        | d, J = 2.4 Hz, 1 H                      |                            |                                          |                                                 |
| 6.11                                        | s, 1 H                                  |                            |                                          |                                                 |
| 5.62                                        | d, J = 8.0 Hz, 1 H                      |                            |                                          |                                                 |
| 4.58                                        | d, J = 7.6 Hz, 1 H                      |                            |                                          |                                                 |
| 4.18                                        | s, 1 H                                  |                            |                                          |                                                 |
| 4.12                                        | s, 1 H                                  |                            |                                          |                                                 |
| 3.56                                        | s, 1 H                                  |                            |                                          |                                                 |
| 3.18                                        | s, 1 H                                  |                            |                                          |                                                 |

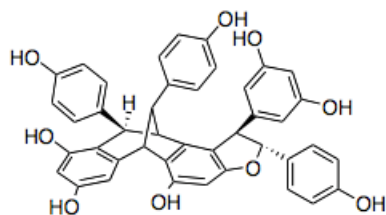

**18:** ampelopsin G

**Table 4** Comparison of <sup>1</sup>H and <sup>13</sup>C NMR spectra of **18** with reported literature data.

| <sup>1</sup> H Literature |                    | <sup>1</sup> H Observed |                    | <sup>13</sup> C Literature | <sup>13</sup> C Observed |
|---------------------------|--------------------|-------------------------|--------------------|----------------------------|--------------------------|
| Chemical Shift            | Appearance         | Chemical Shift          | Appearance         |                            | Acetone at 29.8 ppm      |
| 8.49                      | s, 1 H             | 8.44                    | br s, 2 H          | 161.1                      | 161.1                    |
| 8.46                      | s, 1 H             | 8.36                    | br s, 2 H          | 160.1                      | 160.1                    |
| 8.35                      | s, 2 H             | 8.36                    | br s, 2 H          | 160.1                      | 160.1                    |
| 8.26                      | s, 2 H             | 8.26                    | br s, 3 H          | 160.0                      | 160.0                    |
| 8.23                      | s, 1 H             |                         |                    | 160.0                      | 159.9                    |
| 7.98                      | s, 1 H             | 7.98                    | br s, 1 H          | 158.3                      | 158.3                    |
| 7.81                      | s, 1 H             | 7.84                    | br s, 1 H          | 158.3                      | 158.3                    |
| 7.51                      | s, 1 H             | 7.51                    | br s, 1 H          | 157.9                      | 157.9                    |
| 7.24                      | d, J = 8.8 Hz, 2 H | 7.27                    | d, J = 8.4 Hz, 2 H | 156.1                      | 156.2                    |
| 7.23                      | d, J = 8.8 Hz, 2 H | 7.26                    | d, J = 8.6 Hz, 2 H | 155.9                      | 155.9                    |
| 7.01                      | d, J = 8.3 Hz, 2 H | 7.04                    | d, J = 8.6 Hz, 2 H | 153.5                      | 153.6                    |
| 6.84                      | d, J = 8.8 Hz, 2 H | 6.87                    | d, J = 8.6 Hz, 2 H | 148.5                      | 148.5                    |
| 6.83                      | d, J = 8.8 Hz, 2 H | 6.86                    | d, J = 8.6 Hz, 2 H | 146.1                      | 146.1                    |
| 6.65                      | d, J = 8.3 Hz, 2 H | 6.68                    | d, J = 8.6 Hz, 2 H | 144.2                      | 144.2                    |
| 6.55                      | d, J = 2.0 Hz, 2 H | 6.58                    | d, J = 2.2 Hz, 2 H | 143.3                      | 143.3                    |
| 6.45                      | d, J = 8.8 Hz, 2 H | 6.48                    | d, J = 8.6 Hz, 2 H | 138.4                      | 138.4                    |
| 6.40                      | d, J = 2.0 Hz, 2 H | 6.43                    | d, J = 2.2 Hz, 2 H | 134.4                      | 134.3                    |
| 6.36                      | t, J = 2.0 Hz, 1 H | 6.39                    | t, J = 2.2 Hz, 1 H | 134.3                      | 134.3                    |
| 6.35                      | d, J = 8.8 Hz, 2 H | 6.38                    | d, J = 8.6 Hz, 2 H | 133.6                      | 133.6                    |
| 6.33                      | t, J = 2.0 Hz, 1 H | 6.36                    | t, J = 2.2 Hz, 1 H | 130.1                      | 130.1                    |
| 6.16                      | s, 1 H             | 6.19                    | s, 1 H             | 129.6                      | 129.6                    |
| 6.12                      | s, 1 H             | 6.15                    | s, 1 H             | 128.7                      | 128.7                    |
| 5.61                      | d, J = 7.8 Hz, 1 H | 5.64                    | d, J = 7.9 Hz, 1 H | 128.4                      | 128.4                    |
| 5.43                      | d, J = 6.5 Hz, 1 H | 5.46                    | d, J = 6.6 Hz, 1 H | 128.2                      | 128.2                    |
| 4.93                      | d, J = 6.5 Hz, 1 H | 4.96                    | d, J = 6.6 Hz, 1 H | 118.7                      | 118.7                    |
| 4.56                      | d, J = 7.8 Hz, 1 H | 4.59                    | d, J = 7.9 Hz, 1 H | 118.0                      | 117.9                    |
| 4.16                      | s, 1 H             | 4.20                    | s, 1 H             | 116.3                      | 116.2                    |
| 3.99                      | s, 1 H             | 4.03                    | s, 1 H             | 116.2                      | 116.2                    |
| 3.38                      | s, 1 H             | 3.41                    | s, 1 H             | 115.7                      | 115.7                    |
| 3.10                      | s, 1 H             | 3.14                    | s, 1 H             | 115.6                      | 115.6                    |
|                           |                    |                         |                    | 114.8                      | 114.8                    |
|                           |                    |                         |                    | 108.2                      | 108.2                    |
|                           |                    |                         |                    | 108.2                      | 108.2                    |
|                           |                    |                         |                    | 107.6                      | 107.6                    |
|                           |                    |                         |                    | 102.5                      | 102.5                    |
|                           |                    |                         |                    | 102.0                      | 102.0                    |
|                           |                    |                         |                    | 96.1                       | 96.0                     |
|                           |                    |                         |                    | 96.0                       | 95.9                     |
|                           |                    |                         |                    | 94.3                       | 94.3                     |
|                           |                    |                         |                    | 94.3                       | 94.3                     |
|                           |                    |                         |                    | 57.9                       | 57.9                     |
|                           |                    |                         |                    | 56.9                       | 56.9                     |
|                           |                    |                         |                    | 51.2                       | 51.1                     |
|                           |                    |                         |                    | 49.8                       | 49.8                     |
|                           |                    |                         |                    | 47.7                       | 47.7                     |
|                           |                    |                         |                    | 45.7                       | 45.7                     |

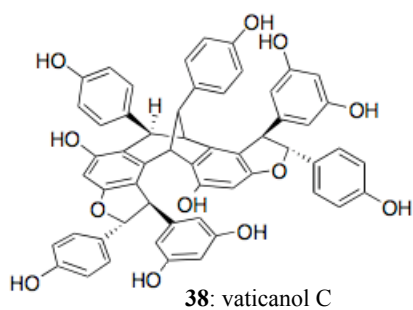

**Table 5** Comparison of <sup>1</sup>H and <sup>13</sup>C NMR spectra of **38** with reported literature data.

## References

1. a) Snyder, S. A., Breazzano, S. P., Ross, A. G., Lin, Y. & Zografos, A. Total synthesis of diverse carbogenic complexity within the resveratrol class from a common building block. *J. Am. Chem. Soc.* **131**, 1753-1765 (2009); b) Snyder, S. A., Zografos, A. L., & Lin, Y. Total synthesis of resveratrol-based natural products: a chemoselective approach. *Angew. Chem. Int. Ed.* **46**, 8186–8191 (2007).
2. Narayanan, J. M. R., Tucker, J. W. & Stephenson, C. R. J. Electron-transfer photoredox catalysis: development of a tin-free reductive dehalogenation reaction. *J. Am. Chem. Soc.* **131**, 8756-8757 (2009).
3. Corey, E. J. & Chaykovsky, M. Dimethyloxosulfonium methylide and dimethylsulfonium methylide. Formation and application to organic synthesis. *J. Am. Chem. Soc.* **87**, 1353–1364 (1965).
4. The debenzylation proceeds much faster in MeOH than in a mixture of MeOH and EtOAc. Since the starting material does not dissolve in pure MeOH the use of a mixture of EtOAc and MeOH is required at the start of the reaction. By refilling the evaporated solvent with MeOH its proportion increases slowly with the increase of the polarity of the partly deprotected substrate.
5. Khupse, R. S. & Erhardt, P. W. Total syntheses of racemic, natural (-) and unnatural (+) glyceollin I. *Org. Lett.* **10**, 5007-5010 (2008).
6. Generally, the last step can be performed without filtering the Pd/C and simply adding Amberlite to the reaction mixture.
7. Preparative thin layer chromatography or flash column chromatography in our hands turned out not to be the method of choice for the purification of the target molecules since a significant amount of material is lost.
8. Bach, N. J., Kornfeld, E. C., Jones, N. D., Chaney, M. O., Dorman, D. E., Paschal, J. W., Clemens, J. A. & Smalstig, E. B. Bicyclic and tricyclic ergoline partial structures. Rigid 3-(2-aminoethyl)pyrroles and 3- and 4-(2-aminoethyl)pyrazoles as dopamine agonists. *J. Med. Chem.* **23**, 481–491 (1980).
9. Tanaka, T., Ito, T., Nakaya, K., Iinuma, M., Takahashi, Y., Naganawa, H. & Riswan, S. Six new heterocyclic stilbene oligomers from stem bark of *Shorea hemsleyana*. *Heterocycles*, **55**, 729-740 (2001).

# **Regioselective Reactions for Programmable Resveratrol Oligomer Synthesis**

Scott A. Snyder,\* Andreas Gollner, and Maria I. Chiriac

Department of Chemistry, Columbia University  
Havemeyer Hall – Mail Code 3129  
3000 Broadway, New York, NY 10027 (USA)

**$^1\text{H}$  and  $^{13}\text{C}$  Spectra**

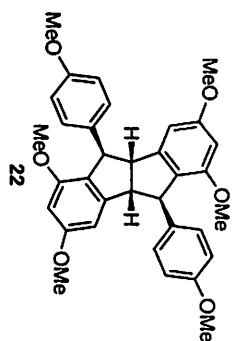

7.073  
7.051

6.807  
6.786  
6.694  
6.690

6.265  
6.261

4.609

3.997

3.859

3.765

3.612

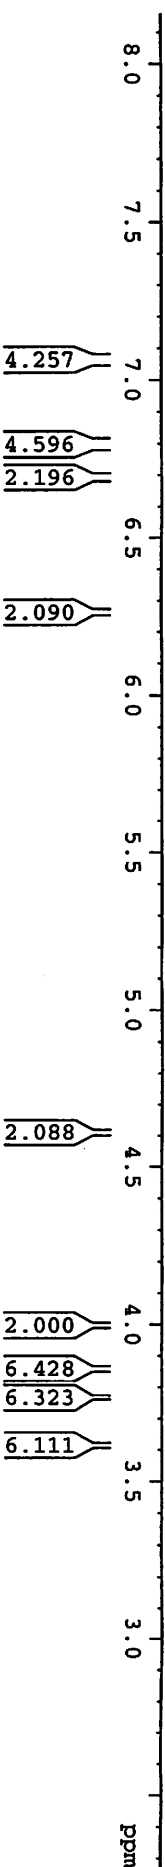

Current Data Parameters  
NAME angofallidinol core  
EXPNO 1  
PROCNO 1

F2 - Acquisition Parameters  
Date\_ 20110303  
Time 17.20  
INSTRUM spect  
PROBHD 5 mm PABBO BB-  
PULPROG zg30  
TD 32768  
SOLVENT CDCl3  
NS 27  
DS 0  
SWH 6009.615 Hz  
FIDRES 0.183399 Hz  
AQ 2.7263477 sec  
RG 256  
DW 83.200 usec  
DE 6.50 usec  
TE 294.2 K  
D1 1.0000000 sec  
TD0 1

===== CHANNEL f1 =====  
NUC1 1H  
P1 9.50 usec  
PL1 -4.00 dB  
PL1W 26.94187927 W  
SFO1 400.1328009 MHz

F2 - Processing parameters  
SI 32768  
SF 400.130086 MHz  
WDW EM  
SSB 0  
LB 0.20 Hz  
GB 0  
PC 1.00

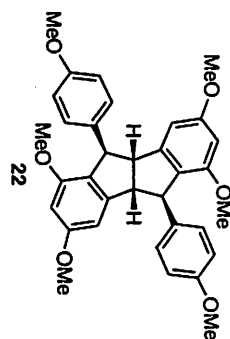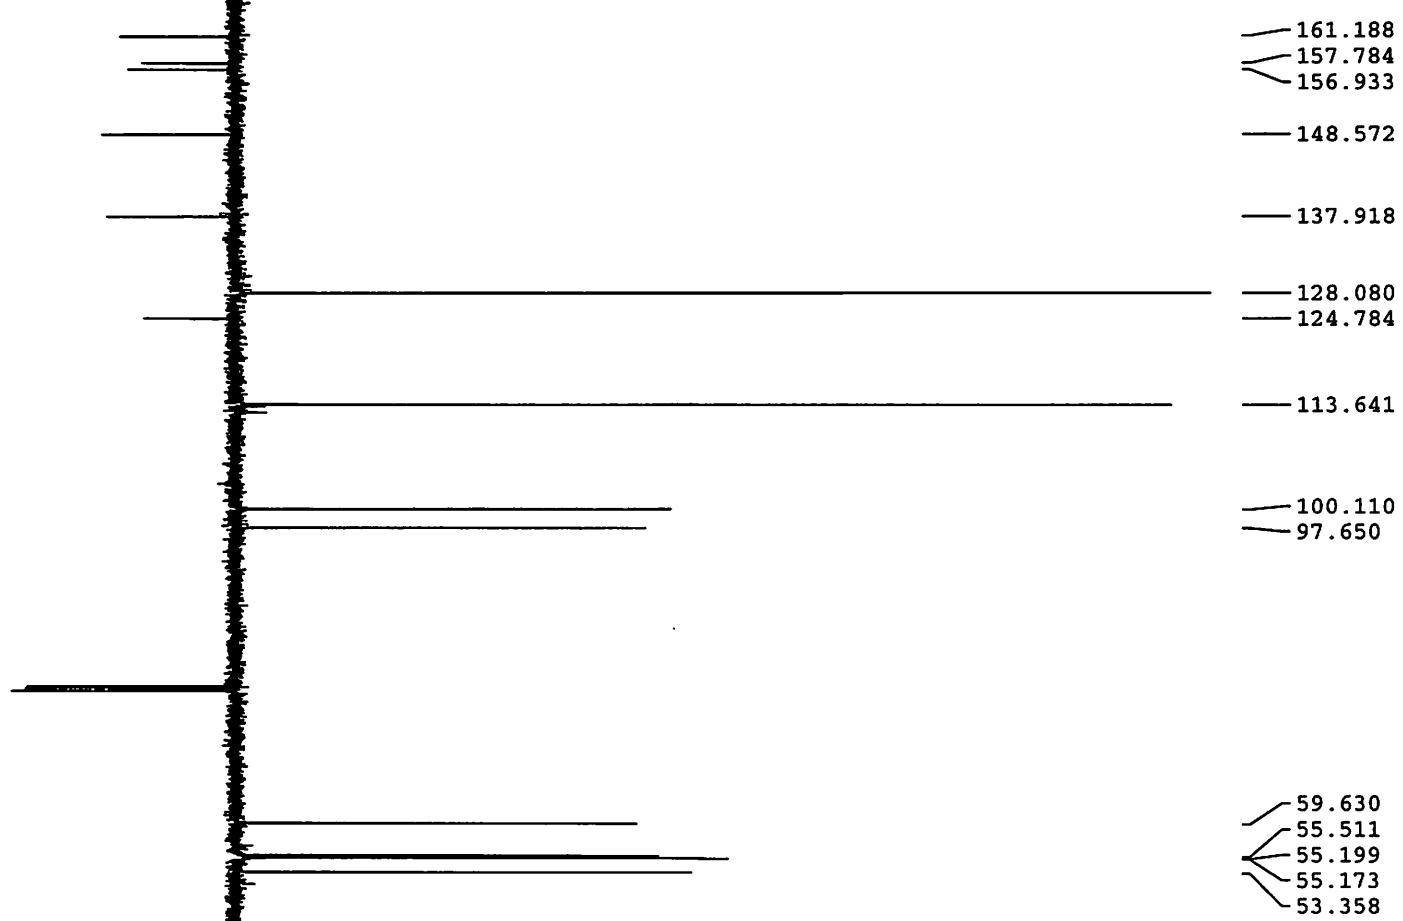

```

NAME          angopallidol core
EXPNO         2
PROCNO        1
Date_         20110303
Time          17.26
INSTRUM       spect
PROBHD        5 mm PABBO BB-
PULPROG       zgpg30
TD            31650
SOLVENT       CDCl3
NS            178
DS            4
SWH           2403.461 Hz
FIDRES        0.714167 Hz
AQ            0.6939700 sec
RG            1820
WDW           20.800 usec
DE            6.50 usec
TE            294.2 K
CNS12         145.0000000
D1            1.5000000
D2            2.000000000 sec
D3            0.00344828 sec
D4            0.00002000 sec
ZGPGTNS       1
===== CHANNEL f1 =====
NUC1          13C
P1            8.50 usec
PL1           120.00 dB
PL2           120.00 dB
PL0           3.20 dB
PL1W          0.00000000 W
PL1W          43.53129468 W
SFO1          100.628298 MHz
SP2           11.07 dB
SPNAM2        Cr60comp.4
SFOAL2        0.500
SFOF52        0.00 Hz
===== CHANNEL f2 =====
CPDPRG2       waltz16
NUC2          1H
P2            14.10 usec
PL2           19.40 usec
PL0           18.80 usec
PCPD2         80.00 usec
PL2           -4.00 dB
PL12          14.60 dB
PL12W         26.94187927 W
PL12W         0.37190142 W
SFO2          400.1316005 MHz
SI            12768
SF          100.6127740 MHz
WDM           EX
SSB           0
LB            1.00 Hz
GB            0
PC            1.40
  
```

7.215  
7.194  
7.035  
7.014  
6.806  
6.795  
6.786  
6.774  
6.668  
6.308  
6.233

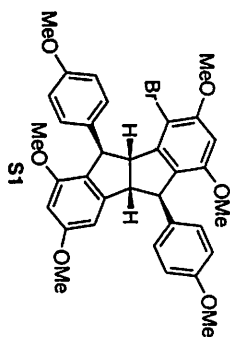

5.032

4.676

4.173  
4.156  
4.102  
4.085  
3.877  
3.855  
3.765  
3.760  
3.626  
3.580

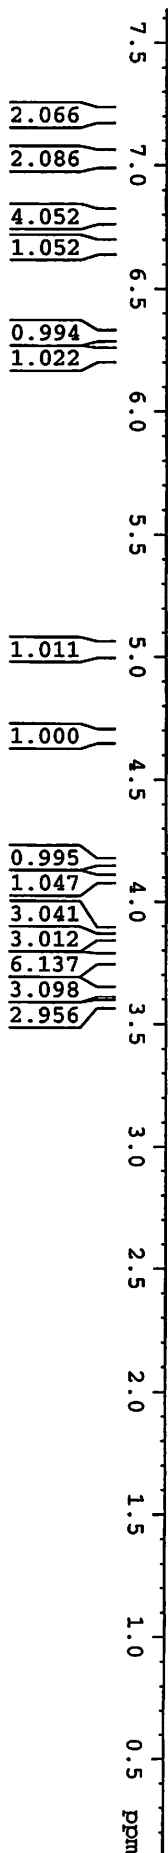

NAME angol126monobromo  
EXPNO 1  
PROCNO 1  
Date\_ 20100512  
Time 17.14  
INSTRUM spect  
PROBHD 5 mm PABBO BB-  
PULPROG zg30  
TD 32768  
SOLVENT CDC13  
NS 12  
DS 0  
SWH 6009.615 Hz  
FIDRES 0.183399 Hz  
AQ 2.7263477 sec  
RG 80.6  
DW 83.200 usec  
DE 6.50 usec  
TE 296.1 K  
D1 1.0000000 sec  
TD0 1

===== CHANNEL f1 =====  
NUC1 1H  
P1 9.50 usec  
PL1 -4.00 dB  
PL1W 26.94187927 W  
SFO1 400.1328009 MHz  
SI 32768  
SF 400.130083 MHz  
WDW EM  
SSB 0  
LB 0.20 Hz  
GB 0  
PC 1.00

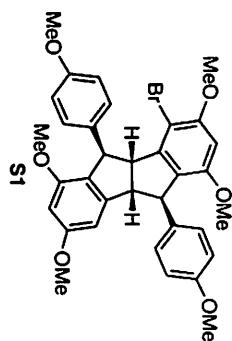

- 161.155
- 157.884
- 157.662
- 156.832
- 156.774
- 156.006
- 147.872
- 146.896
- 138.352
- 137.869
- 128.453
- 128.005
- 127.214
- 125.667
- 113.726
- 113.381
- 100.102
- 99.957
- 97.652
- 95.995
- 61.469
- 58.850
- 56.727
- 55.504
- 55.189
- 55.117
- 54.745
- 51.270

NAME angol126monobromol3c2  
 EXPNO 1  
 PROCNO 1  
 Date\_ 20100512  
 time 17.17  
 INSTRUM spect  
 PROBD PABBO BB-  
 PULPROG zgpg30  
 TD 32768  
 SOLVENT CDC13  
 NS 680  
 DS 0  
 SWH 24038.461 Hz  
 FIDRES 0.733596 Hz  
 AQ 0.6816244 sec  
 RG 1820  
 DW 20.800 usec  
 DE 6.50 usec  
 TE 296.5 K  
 D1 0.6999399 sec  
 D11 0.0300000 sec  
 TD0 1

===== CHANNEL f1 =====  
 NUC1 13C  
 P1 8.50 usec  
 PL1 3.20 dB  
 PL1W 49.53329468 W  
 SFO1 100.6228298 MHz

===== CHANNEL f2 =====  
 CPDPRG2 waltz16  
 NUC2 1H  
 PCPD2 80.00 usec  
 PL2 -4.00 dB  
 PL12 14.60 dB  
 PL13 14.60 dB  
 PL2W 26.94187927 W  
 PL12W 0.37190142 W  
 PL13W 0.37190142 W  
 SFO2 400.1316005 MHz  
 SI 32768  
 SF 100.6127729 MHz  
 WDW EM  
 SSB 0  
 LB 1.00 Hz  
 GB 0  
 PC 1.00

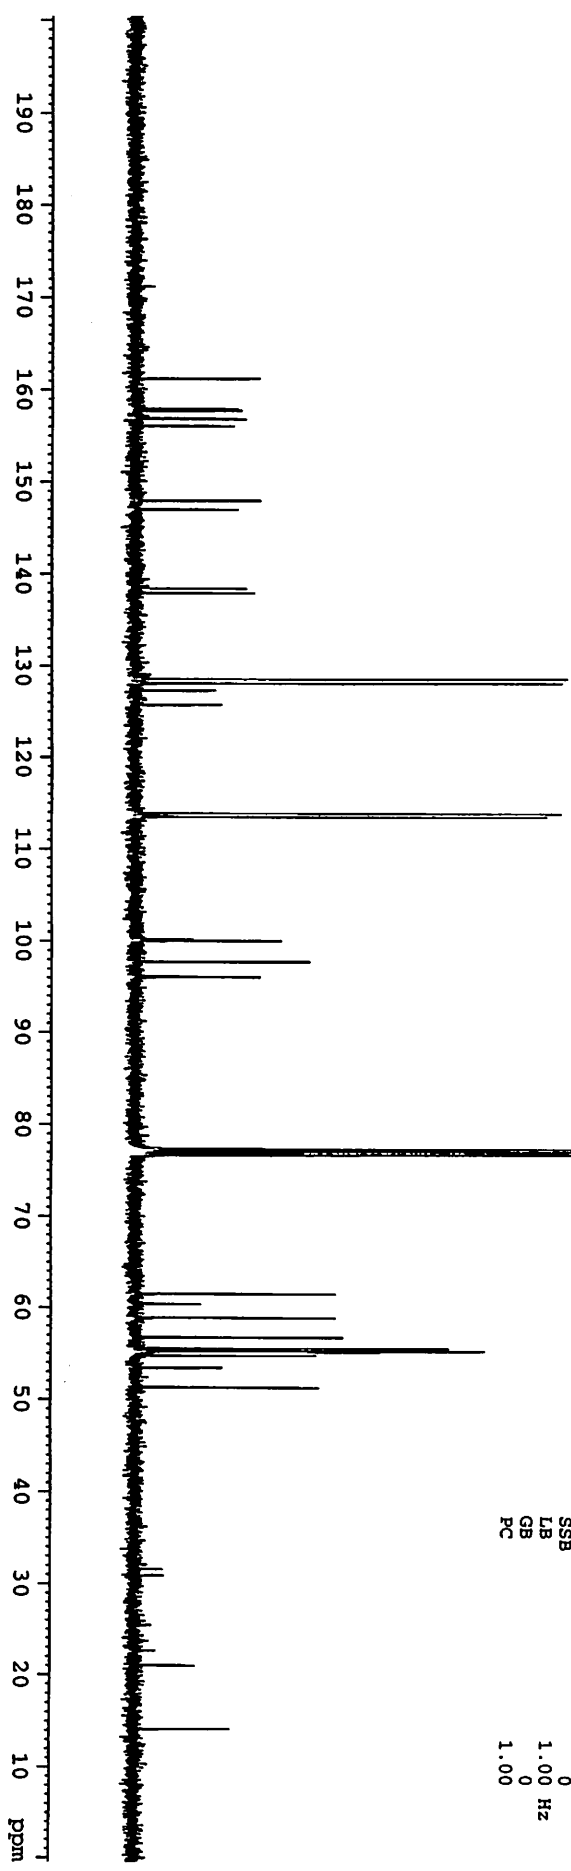

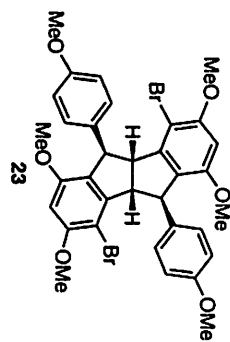

7.187  
7.166

6.804  
6.783

6.274

5.012

4.281

3.867

3.765

3.592

Current Data Parameters  
NAME angol126dibromo  
EXPNO 1  
PROCNO 1

# F2 - Acquisition Parameters

Date\_ 20100512  
Time 16.42  
INSTRUM spect  
PROBHD 5 mm PABBO BB-  
PULPROG zg30  
TD 32768  
SOLVENT CDCl3  
NS 28  
DS 0  
SWH 6009.615 Hz  
FIDRES 0.183399 Hz  
AQ 2.7263477 sec  
RG 57  
DW 83.200 usec  
DE 6.50 usec  
TE 295.8 K  
D1 1.00000000 sec  
TD0 1

==== CHANNEL f1 =====  
NUC1 1H  
P1 9.50 usec  
PL1 -4.00 dB  
PL1W 26.94187927 W  
SFO1 400.1328009 MHz

F2 - Processing parameters  
SI 32768  
SF 400.1300085 MHz  
WDW EM  
SSB 0  
LB 0.20 Hz  
GB 0  
PC 1.00

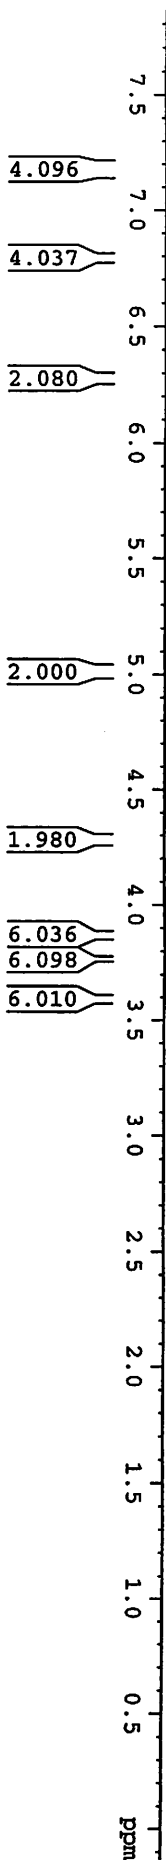

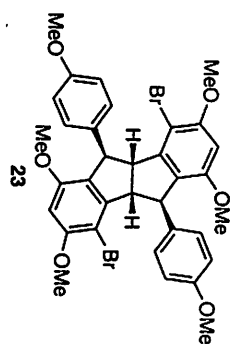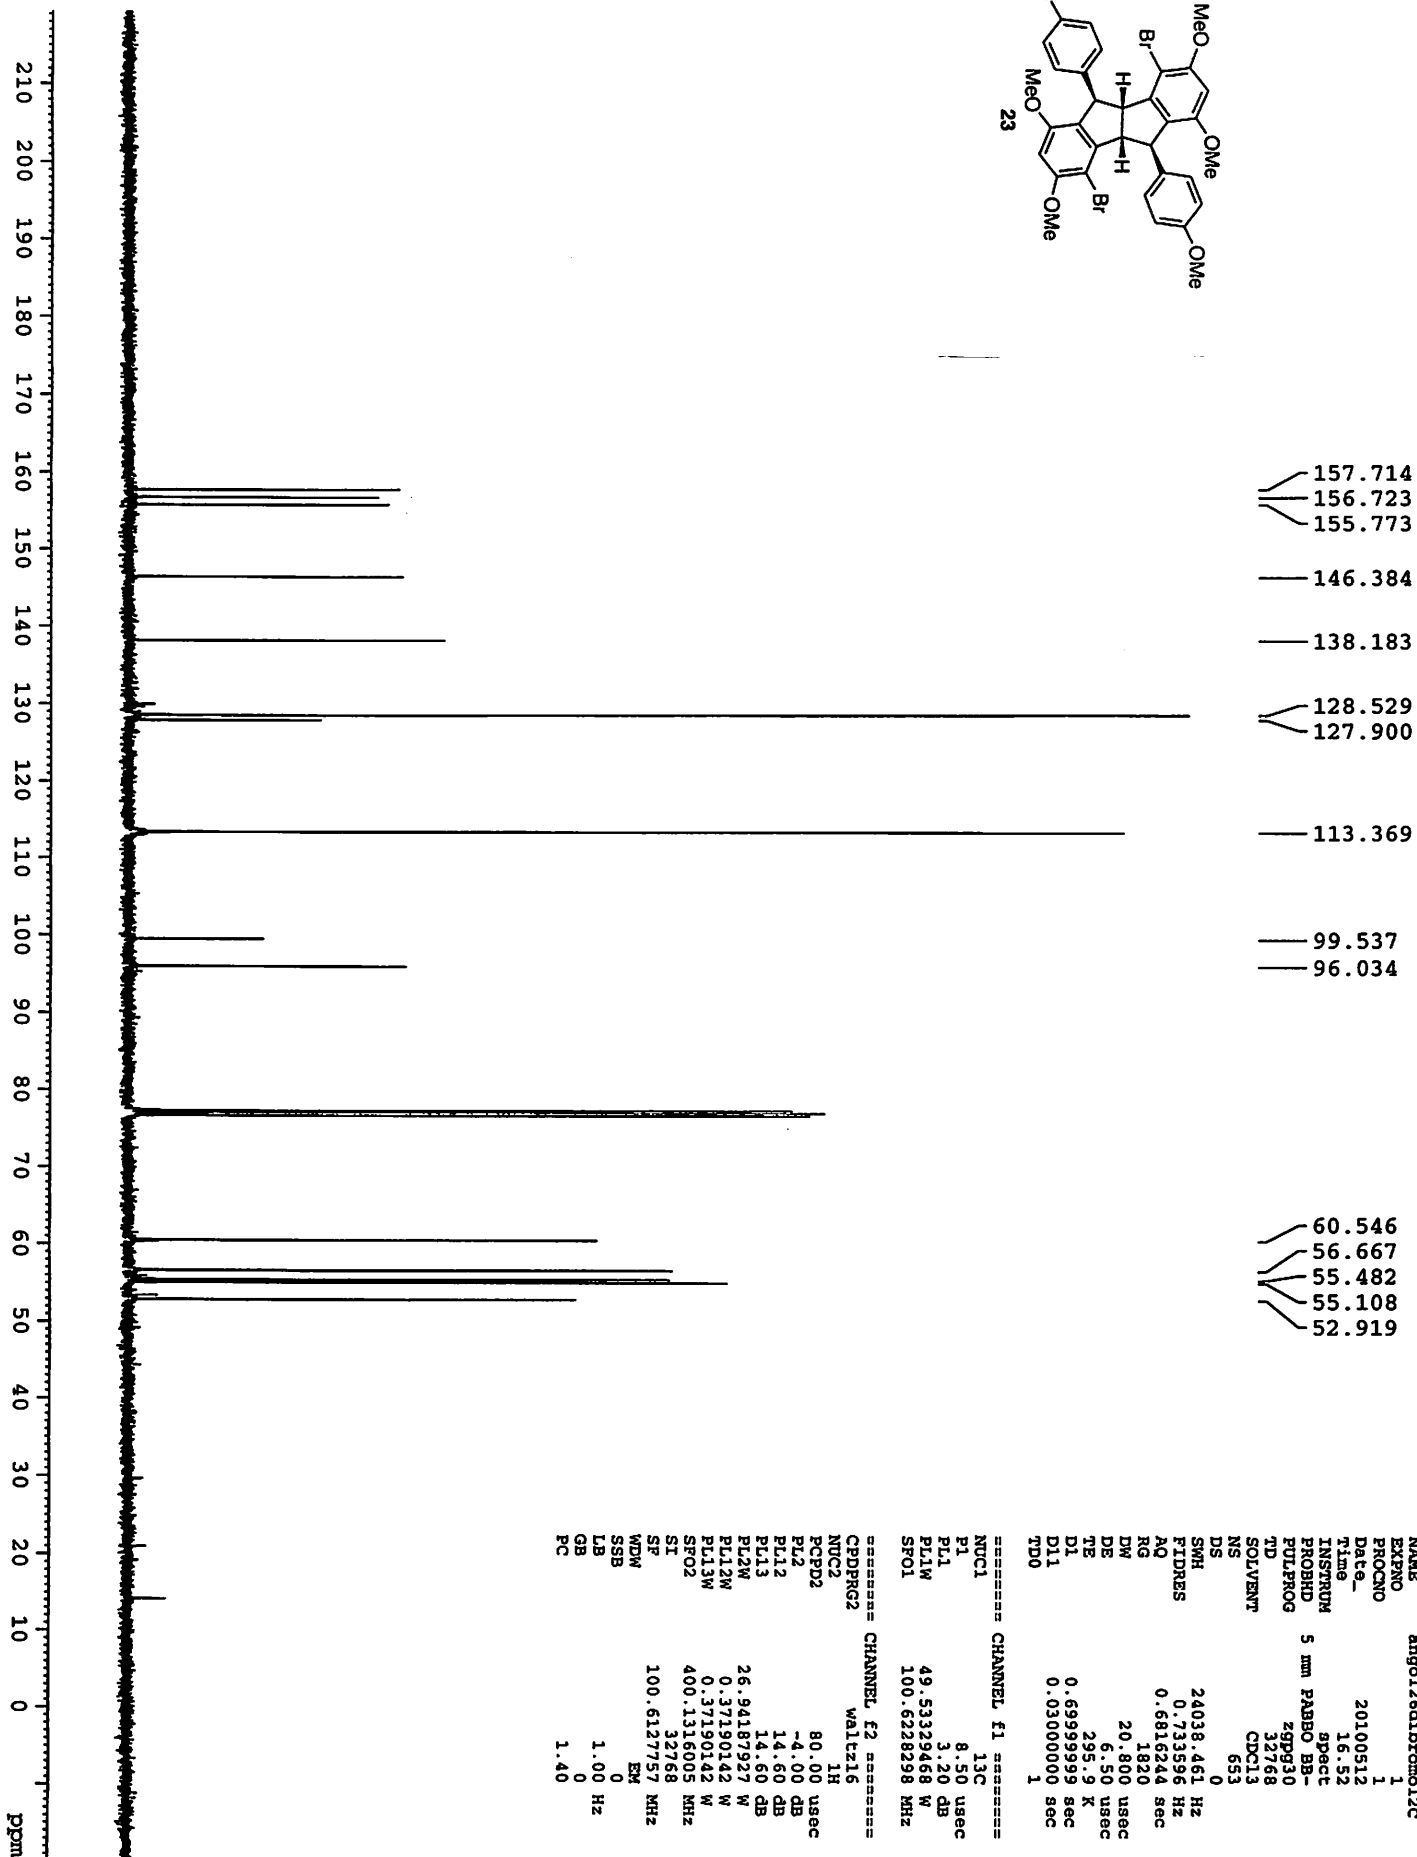

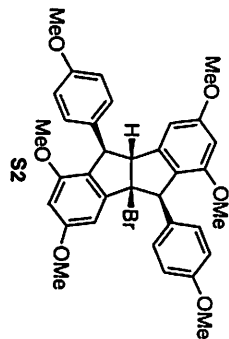

- 7.260
- 7.256
- 7.251
- 7.234
- 7.000
- 6.842
- 6.837
- 6.825
- 6.821
- 6.804
- 6.801
- 6.796
- 6.786
- 6.661
- 6.355
- 6.257
- 4.884
- 4.654
- 4.292
- 3.893
- 3.878
- 3.855
- 3.786
- 3.776
- 3.620
- 3.545

- 1.928
- 2.096
- 4.936
- 1.012
- 0.983
- 0.827
- 1.036
- 1.099
- 1.129
- 2.972
- 2.513
- 2.591
- 3.157
- 2.958
- 2.727

8.0 7.5 7.0 6.5 6.0 5.5 5.0 4.5 4.0 3.5 3.0 2.5 2.0 1.5 1.0 0.5 0.0 ppm

Current Data Parameters  
NAME ang0261  
EXPNO 8  
PROCNO 1

F2 - Acquisition Parameters  
Date\_ 20101119  
Time 12.13  
INSTRUM spect  
PROBHD 5 mm PABBO BB-  
PULPROG zg30  
TD 32768  
SOLVENT CDCl3  
NS 32  
DS 0  
SWH 6009.615 Hz  
FIDRES 0.183399 Hz  
AQ 2.7263477 sec  
RG 322  
DW 83.200 usec  
DE 6.50 usec  
TE 328.2 K  
D1 1.0000000 sec  
TDO 1

===== CHANNEL f1 =====  
NUC1 1H  
P1 9.50 usec  
PL1 -4.00 dB  
PULW 26.94187927 W  
SFO1 400.1328009 MHz

F2 - Processing parameters  
SI 32768  
SF 400.130052 MHz  
WDW EM  
SSB 0  
LB 0.20 Hz  
GB 0  
PC 1.00

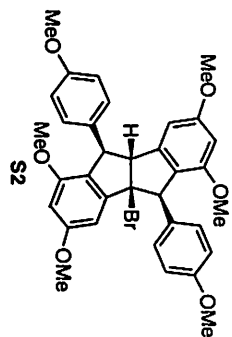

161.953  
161.692  
158.506  
158.221  
157.096  
156.593  
151.041  
146.571

136.472  
135.466  
130.095  
129.109  
124.286  
123.439

113.660  
113.176

100.022  
99.938  
99.737  
98.463

78.334

68.957

58.860  
55.699  
55.603  
55.407  
55.246  
55.144  
53.975

Current Data Parameters  
NAME ang0261  
EXPNO 9  
PROCNO 1

F2 - Acquisition Parameters

Date\_ 20101119

Time 12.19

INSTRUM spect

PROBHD 5 mm PABBO BB-

PULPROG zgpg30

TD 32768

SOLVENT CDCl3

NS 2909

DS 0

SWH 24038.461 Hz

FIDRES 0.733596 Hz

AQ 0.6816244 sec

RG 1820

DM 20.800 usec

DE 6.50 usec

TE 328.2 K

D1 0.69999999 sec

D11 0.03000000 sec

TD0 1

===== CHANNEL f1 =====

NUC1 13C

P1 8.50 usec

PL1 3.20 dB

PL1W 49.53329468 W

SFO1 100.628298 MHz

===== CHANNEL f2 =====

CPDPRG2 waltz16

NUC2 1H

PCPD2 80.00 usec

PL2 -4.00 dB

PL12 14.60 dB

PL13 14.60 dB

PL2W 26.94187927 W

PL12W 0.37190142 W

PL13W 0.37190142 W

SFO2 400.1316005 MHz

F2 - Processing parameters

SI 32768

SF 100.6127601 MHz

WDW EM

SSB 0

LB 1.00 Hz

GB 0

PC 1.40

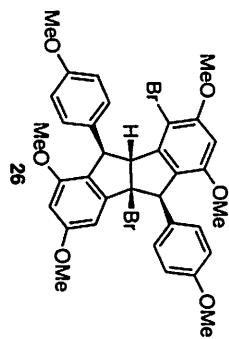

7.518  
7.496  
7.260  
6.941  
6.821  
6.816  
6.805  
6.799  
6.786  
6.778  
6.773  
6.316  
6.307

5.012  
4.974

4.473

3.890  
3.875  
3.779  
3.584  
3.549

Current Data Parameters  
NAME ang0274C  
EXPNO 1  
PROCNO 1

F2 - Acquisition Parameters  
Date\_ 20101122  
Time 17.35  
INSTRUM spect  
PROBHD 5 mm PABBO BB-  
PULPROG zg30  
TD 32768  
SOLVENT CDCl3  
NS 32  
DS 0  
SWH 6009.615 Hz  
FIDRES 0.183399 Hz  
AQ 2.7263477 sec  
RG 228  
DW 83.200 usec  
DE 6.50 usec  
TE 329.3 K  
D1 1.0000000 sec  
TD0 1

===== CHANNEL f1 =====  
NUC1 1H  
P1 9.50 usec  
PL -4.00 dB  
PL1W 26.94187927 W  
SFO1 400.1328009 MHz

F2 - Processing parameters  
SI 32768  
SF 400.130084 MHz  
WDW EM  
SSB 0  
LB 0.20 Hz  
GB 0  
PC 1.00

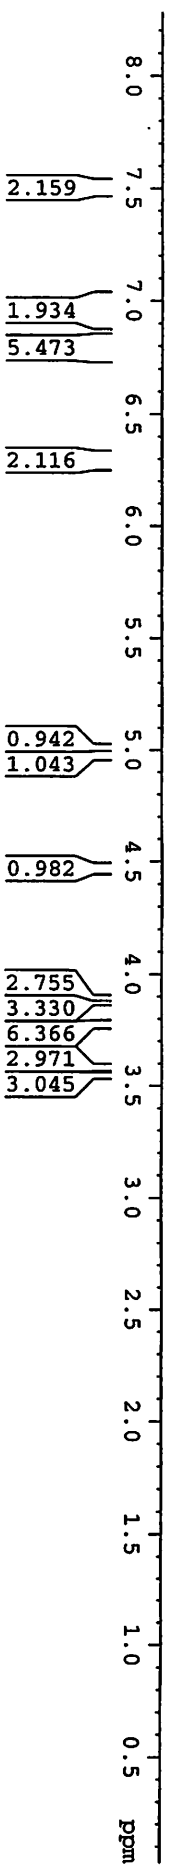

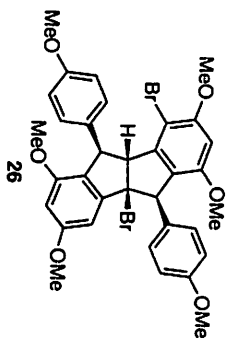

Current Data Parameters

| NAME   | VALUE |
|--------|-------|
| EXPNO  | 3     |
| PROCNO | 1     |

F2 - Acquisition Parameters

| Date_    | Time  |
|----------|-------|
| 20101122 | 17.47 |

INSTRUM 5 mm PABBO BB-  
PROBHD spect  
PULPROG zgpg30  
TD 33650  
SOLVENT CDC13  
NS 1227  
DS 4  
SWH 24038.461 Hz  
FIDRES 0.714367 Hz  
AQ 0.00344828 sec  
RG 1820  
RW 20.800 usec  
DZ 5.50 usec  
TE 328.3 K  
CNS12 145.000000  
D1 1.5000000  
D2 2.0000000 sec  
D12 0.00344828 sec  
D12 0.00002000 sec  
TD0 1  
ZGPGTNS

===== CHANNEL f1 =====

| NUC1    | 13C             |
|---------|-----------------|
| P1      | 8.50 usec       |
| P12     | 2000.00 usec    |
| PL0     | 120.00 dB       |
| PL1     | 3.20 dB         |
| PL0W    | 0 W             |
| PL1W    | 49.53329468 W   |
| SFO1    | 100.6228298 MHz |
| SP2     | 11.07 dB        |
| SPRNG2  | CRP60CMB 4      |
| SFO112  | 0.500           |
| SPOTFS2 | 0 Hz            |

===== CHANNEL f2 =====

| NUC2  | 1H              |
|-------|-----------------|
| P0    | 14.10 usec      |
| P3    | 9.40 usec       |
| P4    | 18.80 usec      |
| PCPD2 | 80.00 usec      |
| PL2   | -4.00 dB        |
| PL12  | 14.60 dB        |
| PL2W  | 26.94187927 W   |
| PL12W | 0.37190142 W    |
| SFO2  | 400.1316005 MHz |

F2 - Processing parameters

| SI  | 32768           |
|-----|-----------------|
| SF  | 100.6127598 MHz |
| WDW | EM              |
| SSB | 0               |
| LB  | 1.00 Hz         |
| GB  | 0               |
| PC  | 1.40            |

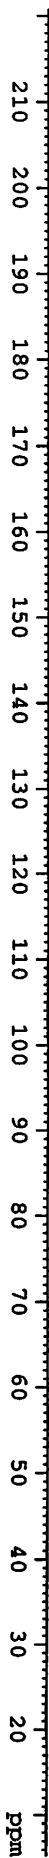

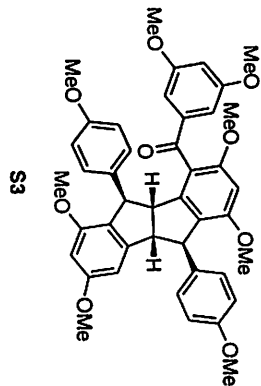

7.120  
7.098  
7.069  
7.063  
6.830  
6.808  
6.731  
6.709  
6.686  
6.683  
6.673  
6.667  
6.661  
6.639  
6.308  
6.237  
6.233

4.632  
4.339  
4.176  
4.160  
3.953  
3.937  
3.877  
3.799  
3.790  
3.711  
3.673  
3.481

1.985  
1.959  
2.054  
2.038  
1.199  
0.983  
2.108  
1.030  
1.000

1.028  
1.006  
1.031  
1.032  
3.059  
6.092  
2.959  
6.057  
2.942  
3.014

8.5 8.0 7.5 7.0 6.5 6.0 5.5 5.0 4.5 4.0 3.5 3.0 2.5 2.0 1.5 1.0 0.5 ppm

Current Data Parameters  
NAME ang0277  
EXPNO 1  
PROCNO 1

F2 - Acquisition Parameters  
Date\_ 20101119  
Time 17.47

INSTRUM spect  
PROBHD 5 mm PABBO BB-  
PULPROG zg30  
TD 32768  
SOLVENT CDCl3  
NS 32  
DS 0  
SWH 6009.615 Hz  
FIDRES 0.183399 Hz  
AQ 2.7263477 sec  
RG 287  
DW 83.200 usec  
DE 6.50 usec  
TE 298.2 K  
D1 1.00000000 sec  
TD0 1

===== CHANNEL f1 =====  
NUC1 1H  
P1 9.50 usec  
PL1 -4.00 dB  
PL1W 26.94187927 W  
SFO1 400.1328009 MHz

F2 - Processing parameters  
SI 32768  
SF 400.1300010 MHz  
WDW EM  
SSB 0  
LB 0.20 Hz  
GB 0  
PC 1.00

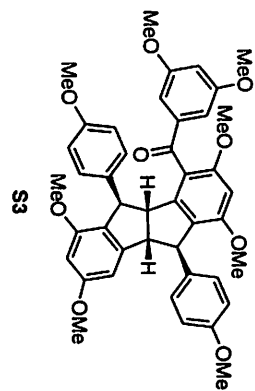

196.911

161.061  
157.882  
157.853  
157.510  
156.864  
148.361  
147.185  
141.248  
137.398  
137.125  
128.136  
127.937  
125.784  
124.833  
118.353  
113.676  
113.303  
106.942  
105.848  
100.066  
97.556  
94.423

58.894  
58.840  
55.463  
55.279  
55.164  
55.031  
55.003  
52.851  
51.848

NAME ang0129 13C  
EXPNO 1  
PROCNO 1  
Date\_ 20100514  
Time 18.17  
INSTRUM spect  
PROBHD 5 mm PABBO BB-  
PULPROG zgpg30  
TD 32768  
SOLVENT CDCl3  
NS 365  
DS 0  
SWH 24038.461 Hz  
FIDRES 0.733596 Hz  
AQ 0.6816244 sec  
RG 1820  
DW 20.800 usec  
DE 6.50 usec  
TE 295.8 K  
D1 0.69999999 sec  
D11 0.03000000 sec  
TD0 1

==== CHANNEL f1 =====  
NUC1 13C  
P1 8.50 usec  
PL1 3.20 dB  
PL1W 49.5329468 W  
SFO1 100.6228298 MHz

==== CHANNEL f2 =====  
CPDPRG2 waltz16  
NUC2 1H  
PCPD2 80.00 usec  
PL2 -4.00 dB  
PL12 14.60 dB  
PL13 14.60 dB  
PL2W 26.94187927 W  
PL12W 0.37190142 W  
PL13W 0.37190142 W  
SFO2 400.1316005 MHz  
SI 32768  
SF 100.6127765 MHz  
WDM EM  
SSB 0  
LB 1.00 Hz  
GB 0  
PC 1.40

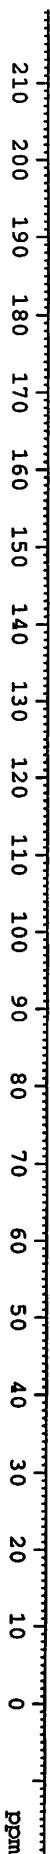

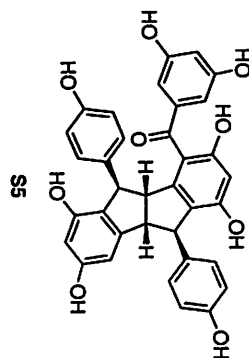

- 9.334
- 8.625
- 8.437
- 8.093
- 8.034
- 7.864
- 7.741
- 7.109
- 7.088
- 6.936
- 6.932
- 6.787
- 6.767
- 6.666
- 6.645
- 6.612
- 6.548
- 6.527
- 6.504
- 6.319
- 6.153
- 4.624
- 4.274
- 4.186
- 4.170
- 3.810
- 3.795

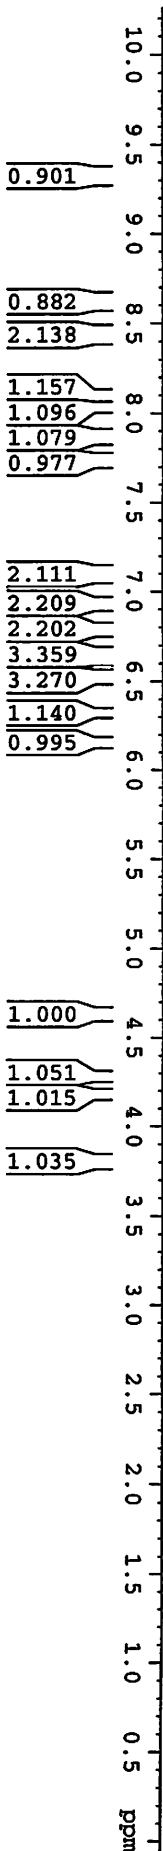

NAME angol11 1H  
 EXPNO 1  
 PROCNO 1  
 Date\_ 20100518  
 Time 15.32  
 INSTRUM spect  
 PROBRD 5 mm PABO BB-  
 PULPROG zg30  
 TD 32768  
 SOLVENT Acetone  
 NS 32  
 DS 0  
 SWH 6009.615 Hz  
 FIDRES 0.183399 Hz  
 AQ 2.7263477 sec  
 RG 161  
 DW 83.200 usec  
 DE 6.50 usec  
 TE 298.0 K  
 D1 1.00000000 sec  
 TD0 1

===== CHANNEL f1 =====  
 NUCL 1H  
 P1 9.50 usec  
 PL1 -4.00 dB  
 PL1W 26.94187927 W  
 SFO1 400.1328009 MHz  
 SI 32768  
 SF 400.1300000 MHz  
 WDW EM  
 SSB 0  
 LB 0.20 Hz  
 GB 0  
 PC 1.00

197.701

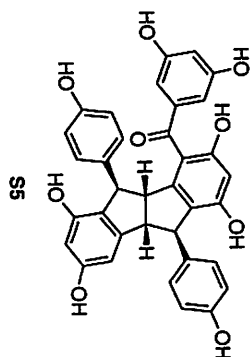

159.155  
158.530  
158.341  
157.141  
155.627  
155.142  
154.203  
148.961  
148.888  
141.426  
136.374  
136.119  
128.166  
124.574  
122.618  
115.138  
114.676  
114.329  
108.370  
106.838  
102.228  
101.808  
101.689

59.710  
58.976  
52.583  
52.422

210 200 190 180 170 160 150 140 130 120 110 100 90 80 70 60 50 40 30 20 10 0 ppm

```

NAME          ang0131  13C2
EXPNO         1
PROCNO        1
Date_         20100518
Time          15.51
INSTRUM       spect
PROBHD        5 mm PABBO BB-
PULPROG       zgpg30
TD            32768
SOLVENT       acetone
NS            2579
DS            0
SWH           24038.461 Hz
FIDRES        0.733596 Hz
AQ            0.6816244 sec
RG            1820
DW            20.800 usec
DE            6.50 usec
TE            298.3 K
D1            0.6999999 sec
D11           0.03000000 sec
TD0           1

===== CHANNEL f1 =====
NUC1          13C
P1            8.50 usec
PL1           3.20 dB
PL1W          49.53323468 W
SF01          100.6228298 MHz

===== CHANNEL f2 =====
CPDPRG2       waltz16
NUC2          1H
PCPD2         80.00 usec
PL2           -4.00 dB
PL12          14.60 dB
PL13          14.60 dB
PL1W          26.94187927 W
PL12W         0.37190142 W
PL13W         0.37190142 W
SFO2          400.1316005 MHz
SI            32768
SF            100.6127690 MHz
WDW           EM
SSB           0
LB            1.00 Hz
GB            0
PC            1.40
  
```

7.450  
7.431  
7.405  
7.396  
7.388  
7.379  
7.360  
7.338  
7.323  
7.295  
7.284  
7.260  
7.242  
7.234  
7.230  
7.213  
7.206  
7.183  
7.179  
7.165  
7.156  
7.151  
7.135  
7.125  
7.113  
7.107  
7.026  
7.012  
7.006  
6.926  
6.913  
6.907  
6.899  
6.878  
6.848  
6.830  
6.796  
6.775  
6.762  
6.758  
6.737  
6.715  
6.710  
6.327  
6.323  
6.287  
5.042  
5.027  
5.005  
4.944  
4.929  
4.902  
4.898  
4.894  
4.871  
4.841  
4.815  
4.785  
4.751  
4.718  
4.706  
4.686  
4.675  
4.639  
4.483  
4.387  
4.370  
4.095  
4.079

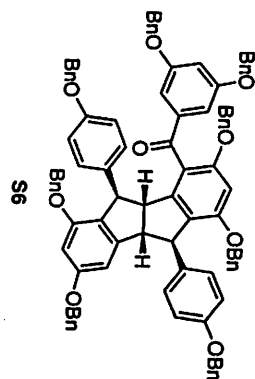

NAME ang0279  
EXPNO 7  
PROCNO 1  
Date\_ 20101117  
Time 14.33  
INSTRUM spect  
PROBHD 5 mm PABBI 1H/  
PULPROG zg30  
TD 32768  
SOLVENT CDCl3  
NS 44  
DS 0  
SWH 6009.615 Hz  
FIDRES 0.183399 Hz  
AQ 2.7263477 sec  
RG 90.5  
DW 83.200 usec  
DE 6.50 usec  
TE 298.2 K  
D1 1.00000000 sec  
TD0 1

===== CHANNEL f1 =====  
NUC1 1H  
P1 7.25 usec  
PL1 0.00 dB  
PL1W 12.20776844 W  
SFO1 399.9225995 MHz  
SI 32768  
SF 399.9200116 MHz  
WDW EM  
SSB 0  
LB 0.30 Hz  
GB 0  
PC 1.00

11.0 10.5 10.0 9.5 9.0 8.5 8.0 7.5 7.0 6.5 6.0 5.5 5.0 4.5 4.0 3.5 3.0 2.5 2.0 1.5 ppm

4.010  
7.113  
14.373  
2.212  
11.216  
2.322  
2.164  
2.075  
2.056  
1.952  
1.337  
3.028  
1.083  
1.125

4.156  
7.990  
1.422  
1.279  
2.336  
1.096  
1.008  
0.997  
1.022

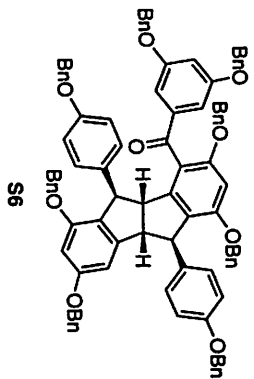

197.068  
160.357  
159.987  
157.941  
157.288  
157.005  
156.831  
155.633  
148.603  
147.754  
141.964  
137.954  
137.671  
137.385  
137.249  
137.044  
136.908  
136.718  
136.562  
136.513  
128.570  
128.495  
128.392  
128.266  
128.112  
128.013  
127.976  
127.901  
127.823  
127.761  
127.606  
127.552  
127.489  
127.451  
127.186  
127.130  
126.915  
126.831  
126.343  
126.034  
118.902  
114.700  
114.345  
108.084  
107.137  
101.671  
99.672  
97.177  
70.736  
70.434  
70.230  
70.073  
69.937  
69.674  
69.092  
58.992  
58.766  
53.772  
52.959

220 210 200 190 180 170 160 150 140 130 120 110 100 90 80 70 60 50 40 30 20 10 0 -10 ppm

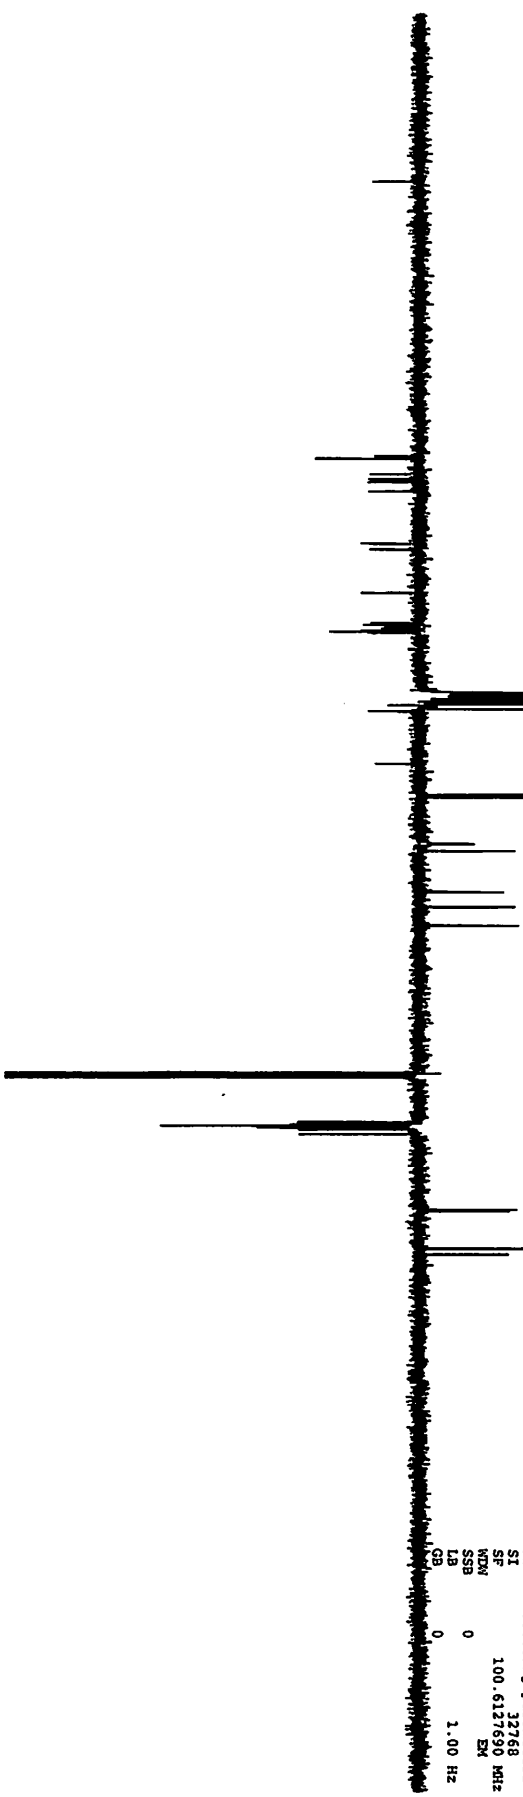

Current Data Parameters  
NAME: arg271  
EXPNO: 1  
PROCNO: 1  
F2 - Acquisition Parameters  
Date\_ Time: 20101118 11:48  
INSTRUM: spect  
PROBHD: 5 mm PABBO B9-  
PULPROG: zgpg30  
TD: 33650  
SOLVENT: CDCl3  
NS: 1706  
DS: 4  
SWH: 24038.461 Hz  
FIDRES: 0.714367 Hz  
AQ: 0.6599700 sec  
RG: 1820  
RW: 20.800 ussec  
DE: 6.50 ussec  
TE: 298.2 K  
CST2: 145.000000  
D1: 1.5000000  
D2: 2.0044828 sec  
D12: 0.0044828 sec  
D13: 0.0002000 sec  
TD0: 1  
ZOOPTNS  
===== CHANNEL f1 =====  
NUC1: 13C  
P1: 8.50 ussec  
P2: 2000.00 ussec  
PL0: 120.00 dB  
PL1: 3.20 dB  
PL0W: 0 W  
PL1W: 49.53329468 W  
SFO1: 100.6282828 MHz  
SFO2: 11.07 dB  
SFOAL2: C7p60ccomp-4  
SFOFS2: 0.500 Hz  
===== CHANNEL f2 =====  
CQDPRG2: waltz16  
NUC2: 1H  
P3: 14.10 ussec  
P4: 9.40 ussec  
P5: 18.80 ussec  
PCPD2: 80.00 ussec  
PL2: -4.00 dB  
PL12: 14.60 dB  
PL2W: 26.94187927 W  
PL12W: 0.37190142 W  
SFO2: 400.1316005 MHz  
F2 - Processing parameters  
SI: 32768  
SF: 100.6127690 MHz  
WDW: EM  
SSB: 0  
LB: 1.00 Hz  
GB: 0

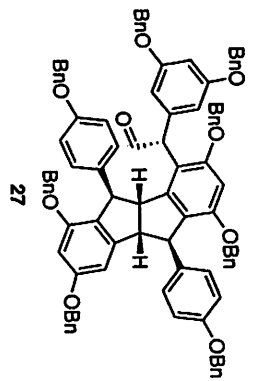

|       |
|-------|
| 9.996 |
| 7.434 |
| 7.416 |
| 7.396 |
| 7.378 |
| 7.359 |
| 7.333 |
| 7.316 |
| 7.301 |
| 7.297 |
| 7.287 |
| 7.277 |
| 7.260 |
| 7.249 |
| 7.239 |
| 7.234 |
| 7.214 |
| 7.209 |
| 7.199 |
| 7.188 |
| 7.177 |
| 7.167 |
| 6.971 |
| 6.950 |
| 6.934 |
| 6.916 |
| 6.901 |
| 6.896 |
| 6.880 |
| 6.863 |
| 6.859 |
| 6.842 |
| 6.601 |
| 6.598 |
| 6.462 |
| 6.457 |
| 6.451 |
| 6.372 |
| 6.328 |
| 6.324 |
| 6.167 |
| 6.162 |
| 5.020 |
| 4.997 |
| 4.948 |
| 4.918 |
| 4.890 |
| 4.865 |
| 4.842 |
| 4.813 |
| 4.787 |
| 4.775 |
| 4.760 |
| 4.745 |
| 4.735 |
| 4.715 |
| 4.686 |
| 4.625 |
| 4.620 |
| 4.502 |
| 4.495 |
| 4.236 |
| 4.229 |
| 4.215 |
| 4.209 |
| 4.182 |
| 4.176 |
| 4.162 |
| 4.156 |

NAME EXPNO 8  
 PROCNO 1  
 Date\_ 20101130  
 Time 20.20  
 INSTRUM spect  
 PROBD 5 mm PABBI 1H/  
 PULPROG zg30  
 TD 32768  
 SOLVENT CDCl3  
 NS 31  
 DS 0  
 SWH 6009.615 Hz  
 FIDRES 0.18339 Hz  
 AQ 2.7263477 sec  
 RG 203  
 DW 83.200 use  
 DE 6.50 use  
 TE 298.7 K  
 D1 1.0000000 sec  
 TD0 1

===== CHANNEL f1 =====  
 NUC1 1H  
 P1 7.25 use  
 PL1 0.00 dB  
 PL1W 12.20776844 W  
 SFO1 399.9225995 MHz  
 SI 32768  
 SF 399.9200116 MHz  
 WDW EM  
 SSB 0  
 LB 0.30 Hz  
 GB 0  
 PC 1.00

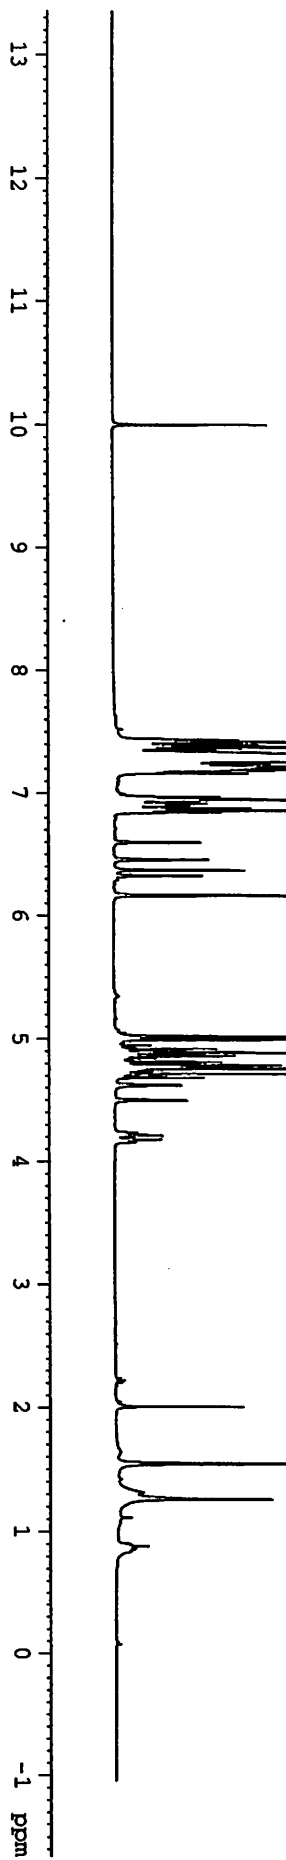

|        |
|--------|
| 8.938  |
| 18.362 |
| 11.129 |
| 4.158  |
| 2.049  |
| 2.114  |
| 1.858  |
| 0.986  |
| 1.010  |
| 1.036  |
| 0.990  |
| 1.965  |
| 1.981  |
| 2.029  |
| 1.168  |
| 4.031  |
| 1.362  |
| 4.967  |
| 2.103  |
| 1.025  |
| 1.000  |
| 1.000  |
| 1.040  |

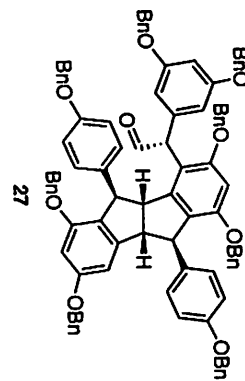

|         |
|---------|
| 200.974 |
| 160.446 |
| 159.906 |
| 157.323 |
| 157.163 |
| 157.093 |
| 155.722 |
| 155.291 |
| 149.346 |
| 148.064 |
| 140.045 |
| 139.250 |
| 139.224 |
| 137.232 |
| 137.070 |
| 137.012 |
| 136.819 |
| 136.730 |
| 136.688 |
| 136.395 |
| 129.245 |
| 128.568 |
| 128.495 |
| 128.461 |
| 128.245 |
| 128.162 |
| 127.913 |
| 127.658 |
| 127.623 |
| 127.478 |
| 127.438 |
| 127.104 |
| 127.006 |
| 126.760 |
| 126.373 |
| 116.008 |
| 114.679 |
| 114.636 |
| 107.551 |
| 101.287 |
| 101.112 |
| 99.443  |
| 97.525  |
| 71.067  |
| 70.347  |
| 70.015  |
| 69.932  |
| 69.877  |
| 69.614  |
| 69.358  |
| 60.499  |
| 59.775  |
| 58.414  |
| 56.326  |
| 56.198  |

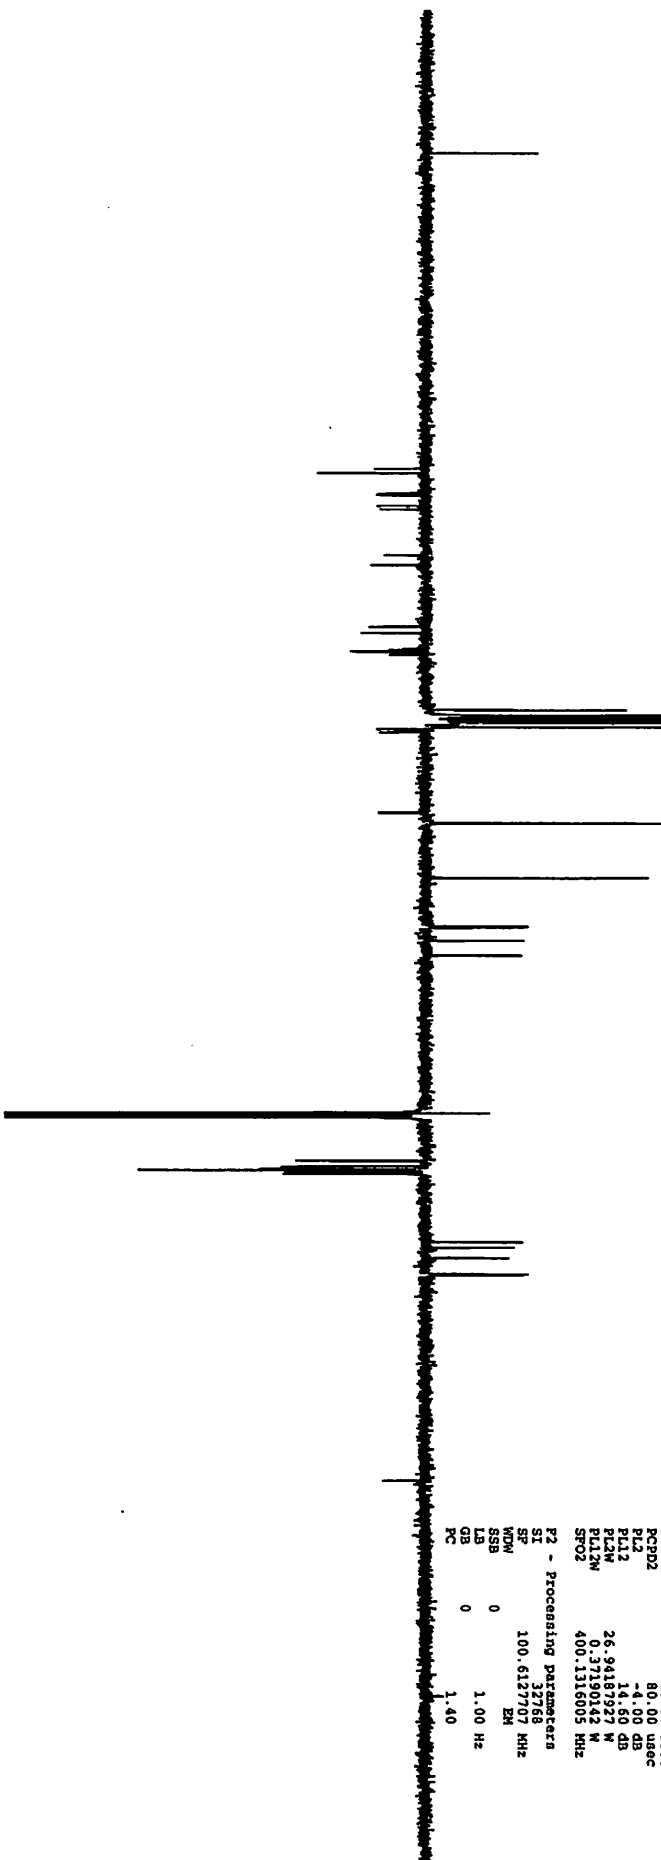

Current Data Parameters  
 NAME: ang285  
 EXPTNO: 2  
 PROCNO: 1  
 F2 - Acquisition Parameters  
 Date\_: 20101130  
 Time: 12.11  
 INSTRUM: spect  
 PROBRD: 5 mm PABO BB-  
 PULPROG: zgpg30  
 TD: 32768  
 SOLVENT: CDCl3  
 NS: 13500  
 DS: 4  
 SWH: 24038.461 Hz  
 FIDRES: 0.711367 Hz  
 AQ: 0.6991120 sec  
 RG: 327.68  
 DM: 20.800 usec  
 DE: 6.50 usec  
 TE: 298.3 K  
 CNST2: 145.0000000  
 CNST12: 1.5000000  
 D1: 2.00000000 sec  
 D2: 0.00344828 sec  
 D12: 0.0002000 sec  
 TDO: 1  
 ZDOPTS: 1  
 \*\*\*\*\* CHANNEL f1 \*\*\*\*\*  
 NUC1: <sup>13</sup>C  
 P1: 8.50 usec  
 P12: 2000.00 usec  
 PL0: 120.00 dB  
 PL1: 3.20 dB  
 PLOFF: 0 W  
 PL1W: 49.5322468 W  
 SFO1: 100.621129 MHz  
 SFO2: 110.00 MHz  
 SFOF2: 0.500  
 SFOF22: 0 Hz  
 \*\*\*\*\* CHANNEL f2 \*\*\*\*\*  
 CPDPRG2: waltz16  
 NUC2: <sup>1</sup>H  
 P2: 14.10 usec  
 P22: 0.44 usec  
 P4: 18.80 usec  
 PCPD2: 80.00 usec  
 PL2: -4.00 dB  
 PL12: 14.50 dB  
 PL1W: 26.94187927 W  
 PL12W: 0.37190142 W  
 SFO2: 400.116005 MHz  
 F2 - Processing parameters  
 SI: 32768  
 SF: 100.6127107 MHz  
 MDW: 500  
 SSB: 0  
 LB: 1.00 Hz  
 GB: 0  
 PC: 1.40

7.494  
7.490  
7.474  
7.471  
7.440  
7.422  
7.400  
7.389  
7.384  
7.381  
7.371  
7.364  
7.351  
7.344  
7.339  
7.334  
7.325  
7.316  
7.303  
7.293  
7.285  
7.260  
7.252  
7.243  
7.238  
7.182  
7.172  
7.162  
7.158  
7.151  
7.129  
7.022  
7.000  
6.977  
6.973  
6.961  
6.954  
6.852  
6.830  
6.814  
6.792  
6.738  
6.716  
6.698  
6.676  
6.494  
6.335  
6.302  
6.296  
6.290  
6.027  
6.022  
5.123  
5.083  
5.042  
5.034  
4.980  
4.971  
4.897  
4.868  
4.822  
4.797  
4.768  
4.711  
4.601  
4.576  
4.565  
4.485  
4.211  
4.140  
2.840  
2.833

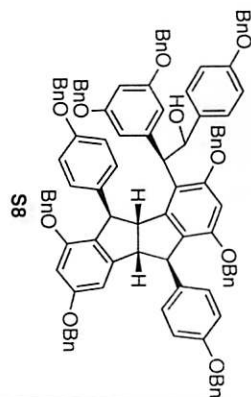

NAME angol139 PP UFL  
EXPNO 1  
PROCNO 1  
Date\_ 20100528  
Time 17.34  
INSTRUM spect  
PROBHD 5 mm PABBI 1H/  
PULPROG zg30  
TD 32768  
SOLVENT CDCl3  
NS 26  
DS 0  
SWH 6009.615 Hz  
FIDRES 0.183399 Hz  
AQ 2.7263477 sec  
RG 181  
DW 83.200 usec  
DE 6.50 usec  
TE 300.0 K  
D1 1.00000000 sec  
TD0 1

===== CHANNEL f1 =====  
NUC1 1H  
P1 7.25 usec  
PL1 0.00 dB  
PL1W 12.20776844 W  
SFO1 399.9225995 MHz  
SI 32768  
SF 399.9200103 MHz  
WDW EM  
SSB 0  
LB 0.20 Hz  
GB 0  
PC 1.00

12 11 10 9 8 7 6 5 4 3 2 1 ppm

30.190  
10.536  
5.478  
2.218  
2.166  
2.098  
2.232  
2.055  
2.561  
1.081  
0.990  
1.161  
1.935  
1.000  
1.099  
1.094  
1.931  
4.166  
1.225  
2.008  
1.097  
2.173  
0.962  
1.126  
4.070  
1.038  
1.093

0.928

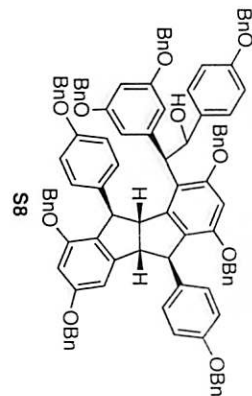

160.324  
159.107  
157.946  
157.859  
157.066  
157.008  
155.564  
154.596  
149.202  
147.870  
144.073  
139.220  
138.692  
137.257  
137.110  
136.970  
136.867  
136.473  
135.540  
129.366  
128.842  
128.557  
128.541  
128.534  
128.520  
128.453  
128.417  
128.373  
128.345  
128.293  
128.257  
127.938  
127.879  
127.852  
127.790  
127.730  
127.652  
127.633  
127.602  
127.419  
127.386  
127.127  
126.911  
114.634  
114.109  
113.827  
108.041  
101.273  
101.035  
99.265  
98.045  
75.248  
71.450  
70.396  
70.031  
69.984  
69.676  
69.484  
59.815  
59.301  
56.939  
55.461  
54.818

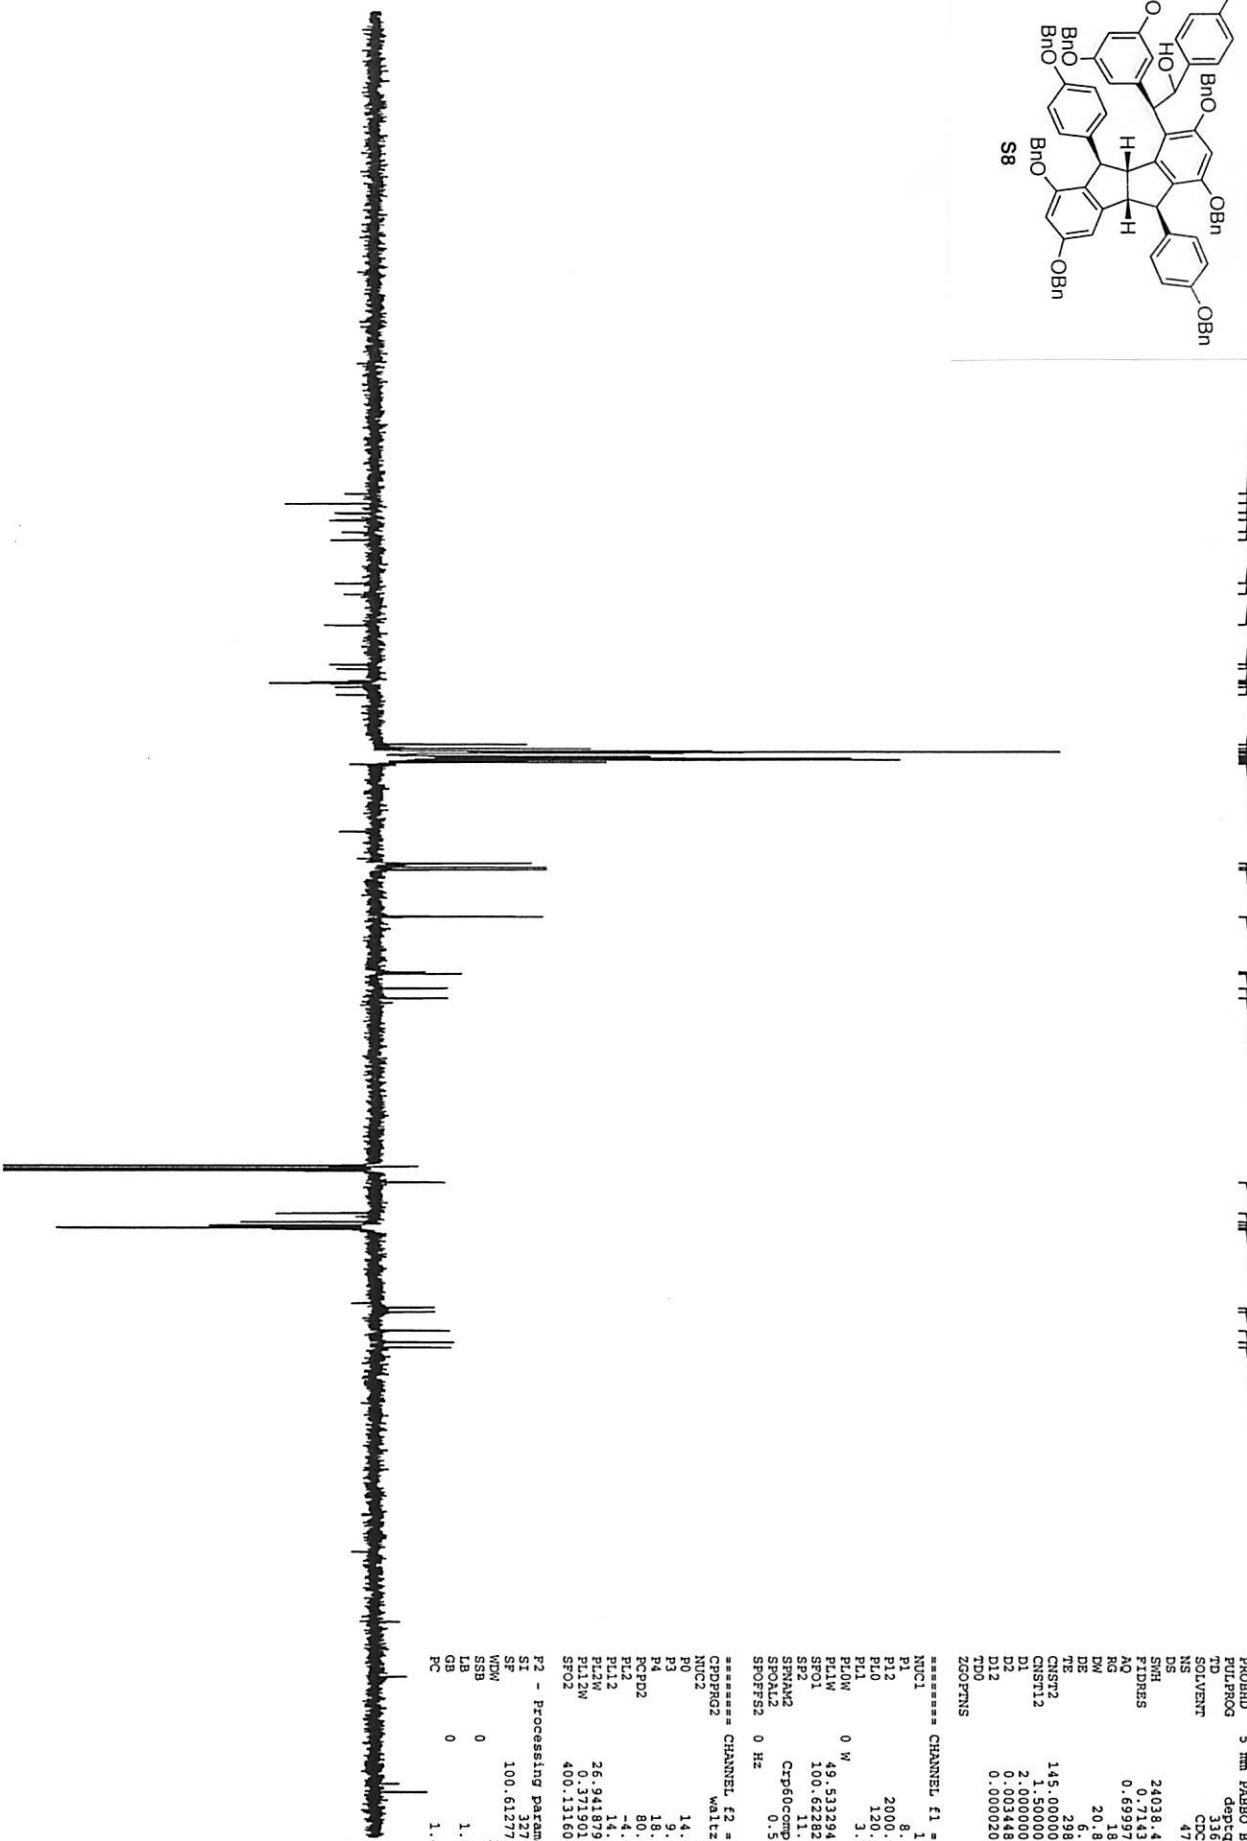

20 210 200 190 180 170 160 150 140 130 120 110 100 90 80 70 60 50 40 30 20 10 ppm

Current Data Parameters  
NAME ang139pub13c  
PRNO 1  
F2 - Acquisition Parameters  
Date- 20100529  
Time- 13.15  
INSTRUM spect  
PROBHD 5 mm PABO BB-  
PULPROG zgpg30  
TD 32768  
SOLVENT CDCl3  
NS 4  
DS 4  
SWH 24038.461 Hz  
FIDRES 0.714367 Hz  
AQ 0.6993700 sec  
RG 1820  
DE 20.800 usec  
TE 298.0 K  
CNS12 145.0000000  
D1 1.5000000  
D2 2.0000000 sec  
D12 0.00344828 sec  
D12 0.0000200 sec  
TD0 1  
ZCOPTNS 1

===== CHANNEL f1 =====  
NUC1 13C  
P1 8.50 usec  
P12 2000.00 dB  
PL0 120.00 dB  
PL1 3.20 dB  
PLW 0 W  
PL1W 49.53329468 W  
SF01 100.6228298 MHz  
SF02 11.07 dB  
SFO1 0.37190143 W  
SFO2 0.37190143 W  
SFOFS2 0 Hz

===== CHANNEL f2 =====  
CPDPRG2 waltz16  
NUC2 1H  
P0 14.10 usec  
P3 9.40 usec  
P4 18.80 usec  
PCPD2 80.00 usec  
PL2 14.00 dB  
PL12 14.00 dB  
PL1W 26.94187529 W  
PL12W 0.37190143 W  
SFO2 400.1316005 MHz

F2 - Processing Parameters  
SI 32768  
SF 100.6127715 MHz  
WDW EM  
SSB 0  
LB 1.00 Hz  
GB 0  
PC 1.40

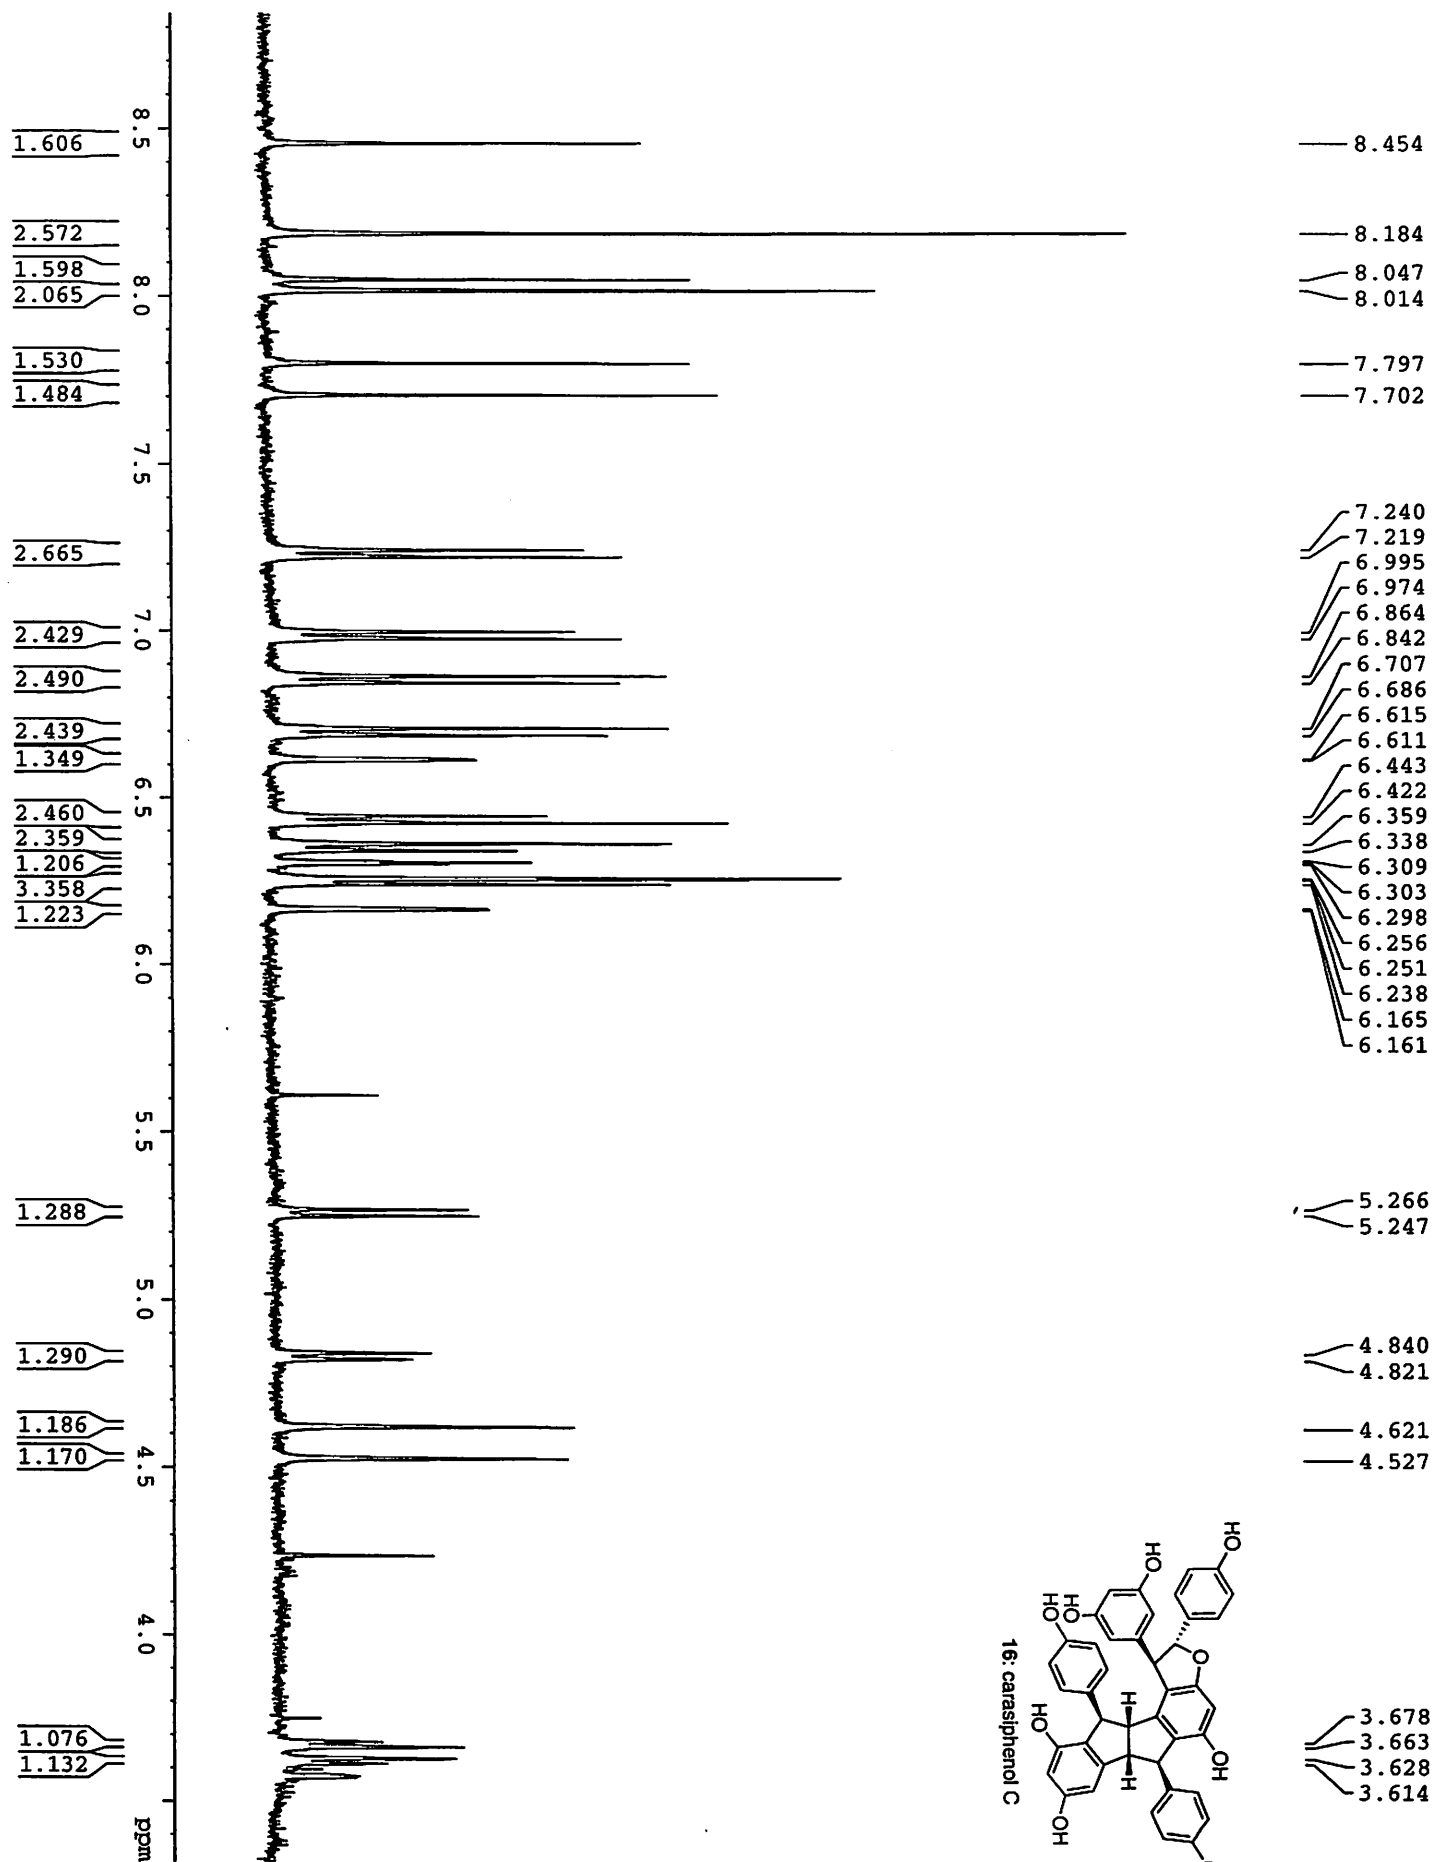

Current Data Parameters  
NAME Carasiphenol-C  
EXPNO 3  
PROCNO 99

F2 - Acquisition Parameters  
Date\_ 20100811  
Time 6.59

INSTRUM spect  
PROBHD 5 mm CPUL 13C  
PULPROG zgpg30

TD 134144  
SOLVENT Acetone  
NS 9216

DS 39062.500 Hz  
SWH 0.221198 Hz  
AQ 1.7170932 sec

FIDRES 12.800 usec  
RG 327.3  
DE 25.82 usec

TE 297.2 K  
D1 2.0000000 sec  
D11 0.0300000 sec

TD0 1

===== CHANNEL f1 =====  
NUC1 13C  
P1 10.25 usec  
PL1 3.10 dB  
PL1W 32.60212326 W  
SFO1 150.9209173 MHz

===== CHANNEL f2 =====  
CPDPRG2 waltz16  
NUC2 1H  
PCPD2 70.00 usec  
PL2 1.40 dB  
PL2W 15.00 dB  
PL3 15.00 dB  
PL3W 7.46299919 W  
PL2W 0.41012228 W  
PL3W 0.41012228 W  
SFO2 600.1324005 MHz

F2 - Processing parameters  
SI 65536  
SF 150.9026637 MHz  
WIM EM  
SSB 0  
LB 1.00 Hz  
GB 0  
PC 1.50

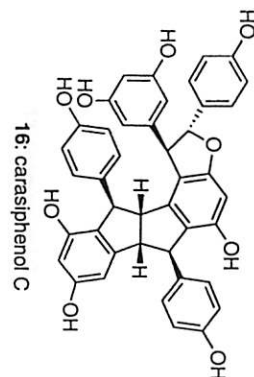

- 162.946
- 160.168
- 159.398
- 158.409
- 157.739
- 156.424
- 156.111
- 155.535
- 150.851
- 145.490
- 145.120
- 137.720
- 136.651
- 133.362
- 130.642
- 130.623
- 129.201
- 129.159
- 128.797
- 125.838
- 122.987
- 116.421
- 116.215
- 115.959
- 115.365
- 107.609
- 103.460
- 102.623
- 102.364
- 96.946
- 94.787
- 60.116
- 59.923
- 57.169
- 53.351
- 50.016

230 220 210 200 190 180 170 160 150 140 130 120 110 100 90 80 70 60 50 ppm

7.076  
7.070  
6.747  
6.725  
6.668  
6.662  
6.656  
6.652  
6.630  
6.266

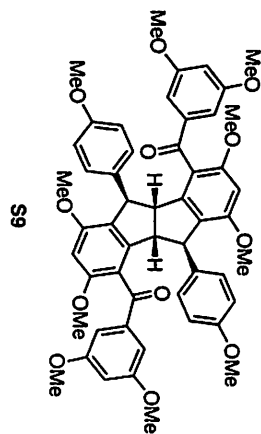

4.364  
4.049  
3.798  
3.697  
3.662  
3.557

Current Data Parameters  
NAME angol28 1H  
EXPNO 1  
PROCNO 1

F2 - Acquisition Parameters

Date\_ 20100514  
Time 15.01  
INSTRUM spect  
PROBHD 5 mm PABBO BB-  
PULPROG zg30  
TD 32768  
SOLVENT CDCl3  
NS 17  
DS 0  
SWH 6009.615 Hz  
FIDRES 0.18339 Hz  
AQ 2.7263477 sec  
RG 32  
DW 83.200 usec  
DE 6.50 usec  
TE 295.7 K  
D1 1.0000000 sec  
TD0 1

==== CHANNEL f1 =====

NUC1 1H  
P1 9.50 usec  
PL1 -4.00 dB  
PL1W 26.94187927 W  
SFO1 400.1328009 MHz

F2 - Processing Parameters

SI 32768  
SF 400.130085 MHz  
WDW EM  
SSB 0  
LB 0.20 Hz  
GB 0  
PC 1.00

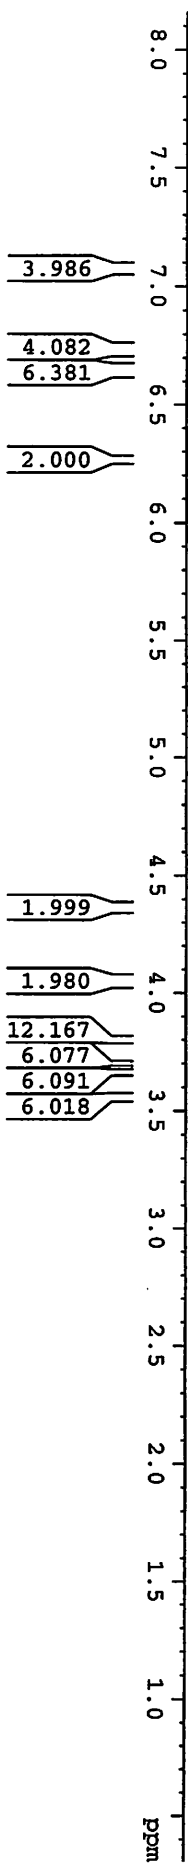

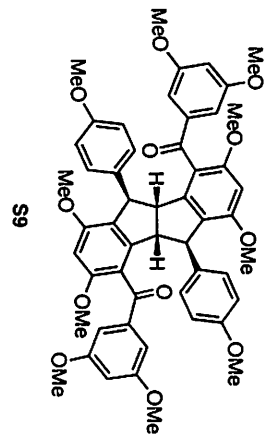

196.762

160.673  
158.789  
157.772  
157.600

146.806

141.047

136.702

125.571

118.030

113.319

107.035  
105.798

94.452

77.000

58.314  
56.118  
55.473  
55.110  
55.042  
51.381

NAME ang0128 13C  
EXPNO 1  
PROCNO 1  
Date\_ 20100514  
Time 15.11  
INSTRUM spect  
PROBHD 5 mm PABBO B9-  
PULPROG zgpg30  
TD 32768  
SOLVENT CDCl3  
NS 1028  
DS 0  
SMH 24038.461 Hz  
FIDRES 0.731596 Hz  
AQ 0.6816244 sec  
RG 1820  
DW 20.800 usec  
DE 6.50 usec  
TE 297.0 K  
D1 0.69399999 sec  
D11 0.03000000 sec  
TD0 1

===== CHANNEL f1 =====  
NUC1 13C  
P1 8.50 usec  
PL1 3.20 dB  
PL1W 49.53329468 W  
SFO1 100.6228298 MHz

===== CHANNEL f2 =====  
CPDPRG2 waltz16  
NUC2 1H  
PCPD2 80.00 usec  
PL2 -4.00 dB  
PL12 14.60 dB  
PL13 14.60 dB  
PL2W 26.94187927 W  
PL13W 0.37190142 W  
SFO2 400.1315005 MHz  
SI 32768  
SF 100.6127781 MHz  
WDW EM  
SSB 0  
LB 1.00 Hz  
GB 0  
PC 1.40

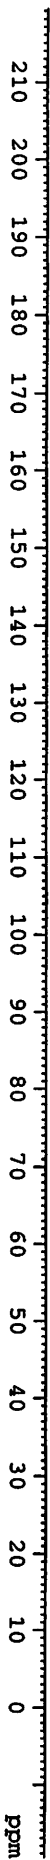

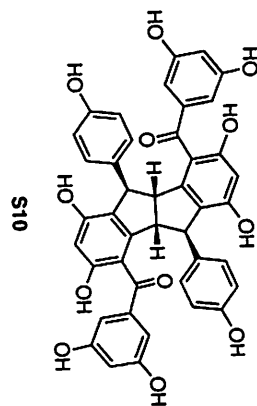

9.428

8.566

8.387

7.890

6.885

6.881

6.755

6.734

6.588

6.567

6.463

6.238

4.274

4.130

NAME ang0131 UFI  
EXPNO  
PROCNO  
Date\_ 2010051  
Time 11.5  
INSTRUM spec  
PROBHD 5 mm PABBI 1h  
PULPROG zg3  
TD 3276  
SOLVENT Acetor  
NS  
DS  
SWH 6009.61  
FIDRES 0.18335  
AQ 2.726347  
RG 11  
DW 83.20  
DE 6.5  
TE 300.  
D1 1.0000000  
TD0

===== CHANNEL f1 ==  
NUC1 1  
P1 7.2  
PL1 0.0  
PL1W 12.2077684  
SFO1 399.922595  
SI 3276  
SF 399.920010  
WDW I  
SSB  
LB 0.2  
GB  
PC 1.0

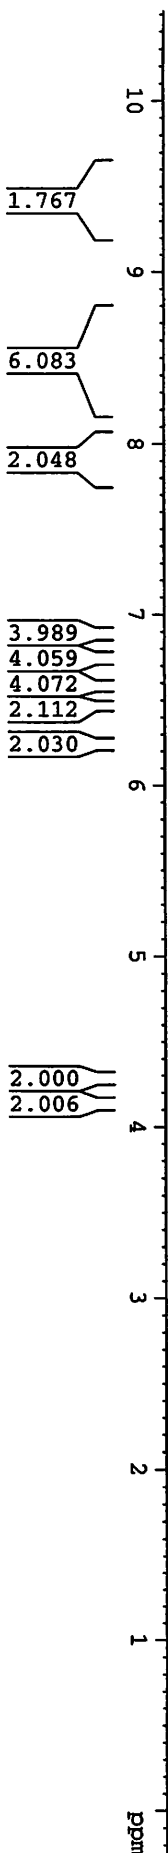

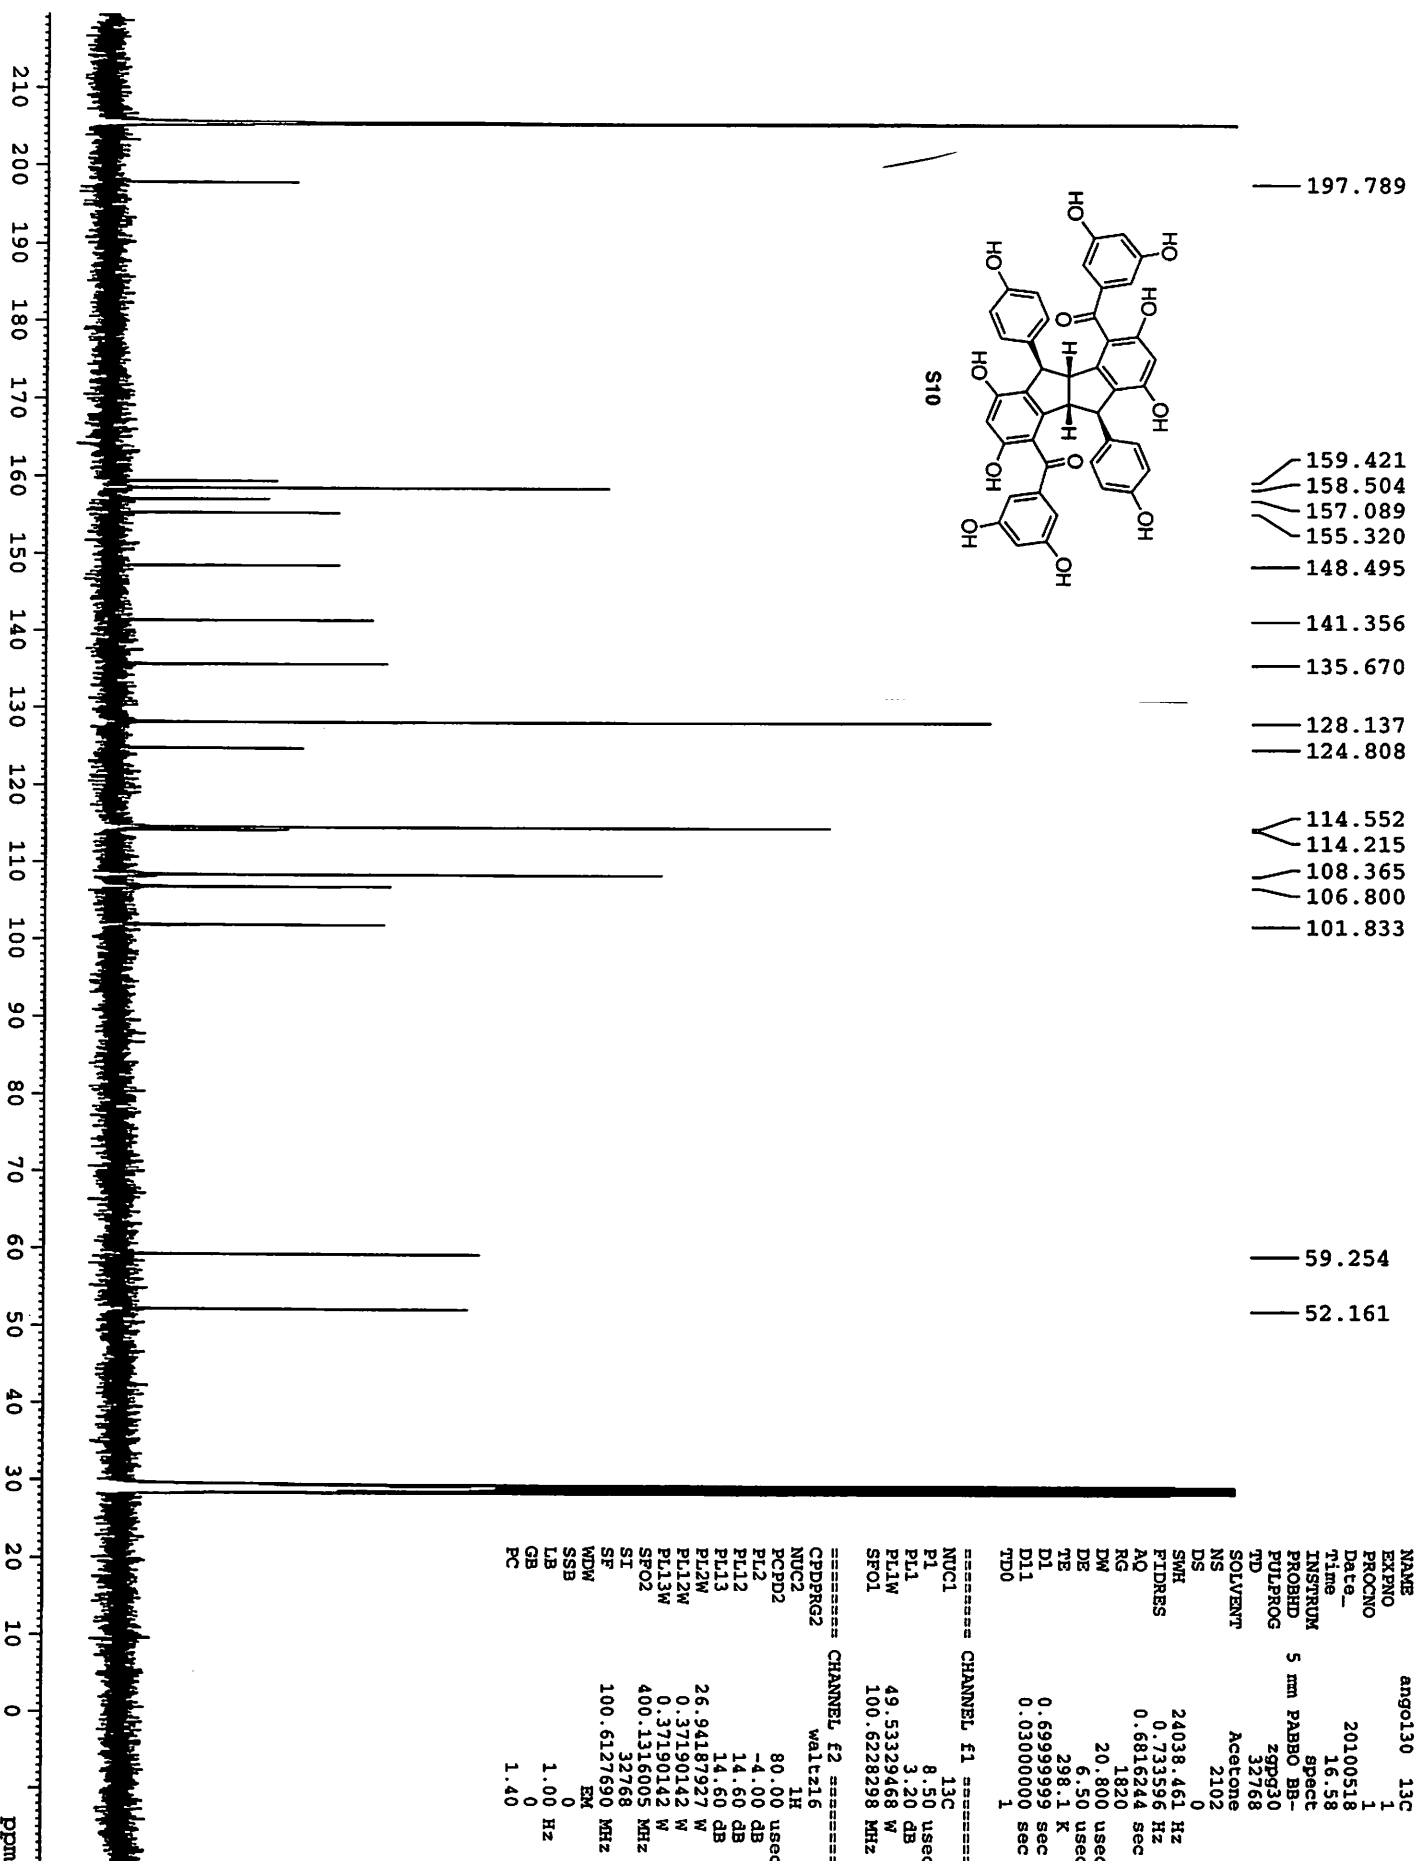

197.789  
159.421  
158.504  
157.089  
155.320  
148.495  
141.356  
135.670  
128.137  
124.808  
114.552  
114.215  
108.365  
106.800  
101.833  
59.254  
52.161

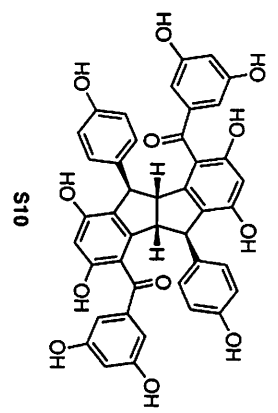

NAME angol30 13C  
EXENO 1  
PROCNO 1  
Date\_ 20100518  
Time 16.58  
INSTRUM spect  
PROBHD 5 mm PABBO BB-  
PULPROG zgpg30  
TD 32768  
SOLVENT Acetone  
NS 2102  
DS 0  
SWH 24038.461 Hz  
FIDRES 0.733596 Hz  
AQ 0.6816244 sec  
RG 1820  
RG 20.800 usec  
DW 6.50 usec  
DE 298.1 K  
TE 0.69999999 sec  
D1 0.03000000 sec  
D11 1  
TD0 1

===== CHANNEL f1 =====  
NUC1 13C  
P1 8.50 usec  
PL1 3.20 dB  
PL1W 49.53329468 W  
SFO1 100.6228298 MHz

===== CHANNEL f2 =====  
CPDPRG2 waltz16  
NUC2 1H  
PCPD2 80.00 usec  
PL2 -4.00 dB  
PL2 14.60 dB  
PL13 14.60 dB  
PL2W 26.94187927 W  
PL12W 0.37190142 W  
PL13W 0.37190142 W  
SFO2 400.1316005 MHz  
SI 32768  
SF 100.6127690 MHz  
WDW EM  
SSB 0  
LB 1.00 Hz  
GB 0  
PC 1.40

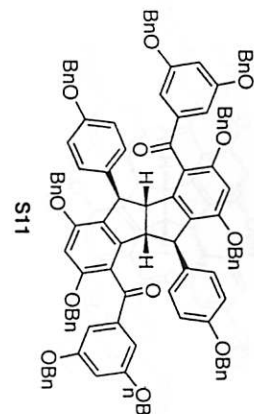

- 7.371
- 7.366
- 7.355
- 7.346
- 7.335
- 7.323
- 7.317
- 7.310
- 7.301
- 7.289
- 7.198
- 7.192
- 7.189
- 7.185
- 7.175
- 7.169
- 7.150
- 6.948
- 6.944
- 6.931
- 6.925
- 6.891
- 6.874
- 6.853
- 6.831
- 6.745
- 6.743
- 6.737
- 6.724
- 4.932
- 4.907
- 4.848
- 4.817
- 4.799
- 4.769
- 4.765
- 4.733
- 4.721
- 4.692
- 4.535
- 4.345

- 24.168
- 6.255
- 10.029
- 6.482
- 4.191
- 4.303
- 4.057
- 6.774

- 2.029

- 8.294
- 3.935
- 2.261
- 2.255
- 2.136
- 2.107
- 2.196
- 2.000

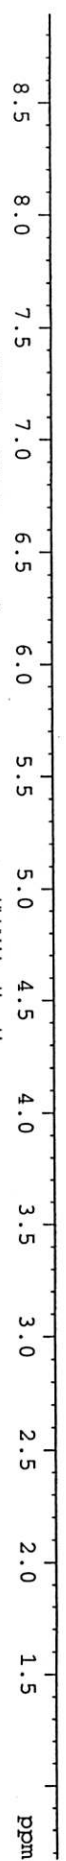

```

NAME          angol32 f2
EXPNO         1
PROCNO        1
Date_         20100519
Time          20.45
INSTRUM       spect
PROBHD        5 mm PABBI 1H/
PULPROG       zg30
TD            32768
SOLVENT       CDCl3
NS            26
DS            0
SWH           6009.615 Hz
FIDRES        0.183399 Hz
AQ            2.7263477 sec
RG            28.5
DW            83.200 usec
DE            6.50 usec
TE            294.9 K
D1            1.00000000 sec
TD0           1

===== CHANNEL f1 =====
NUC1          1H
P1            7.25 usec
PL1           0.00 dB
PL1W          12.20776844 W
SFO1          399.9225995 MHz
SI            32768
SF            399.9200103 MHz
WDW           EM
SSB           0
LB            0.20 Hz
GB            0
PC            1.00
  
```

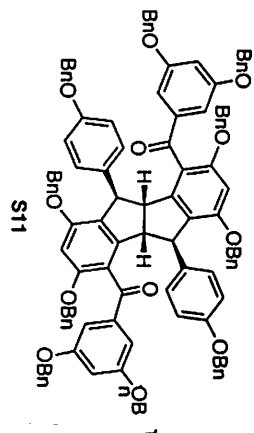

- 196.846
- 159.940
- 157.933
- 157.044
- 156.534
- 147.721
- 141.833
- 137.292
- 137.197
- 136.611
- 136.520
- 136.432
- 128.557
- 128.452
- 128.311
- 128.232
- 127.989
- 127.740
- 127.578
- 127.420
- 126.871
- 126.788
- 126.376
- 118.745
- 114.350
- 108.125
- 106.945
- 97.380
- 70.730
- 70.243
- 69.856
- 69.263
- 58.161
- 52.747

210 200 190 180 170 160 150 140 130 120 110 100 90 80 70 60 50 40 30 20 10 0 ppm

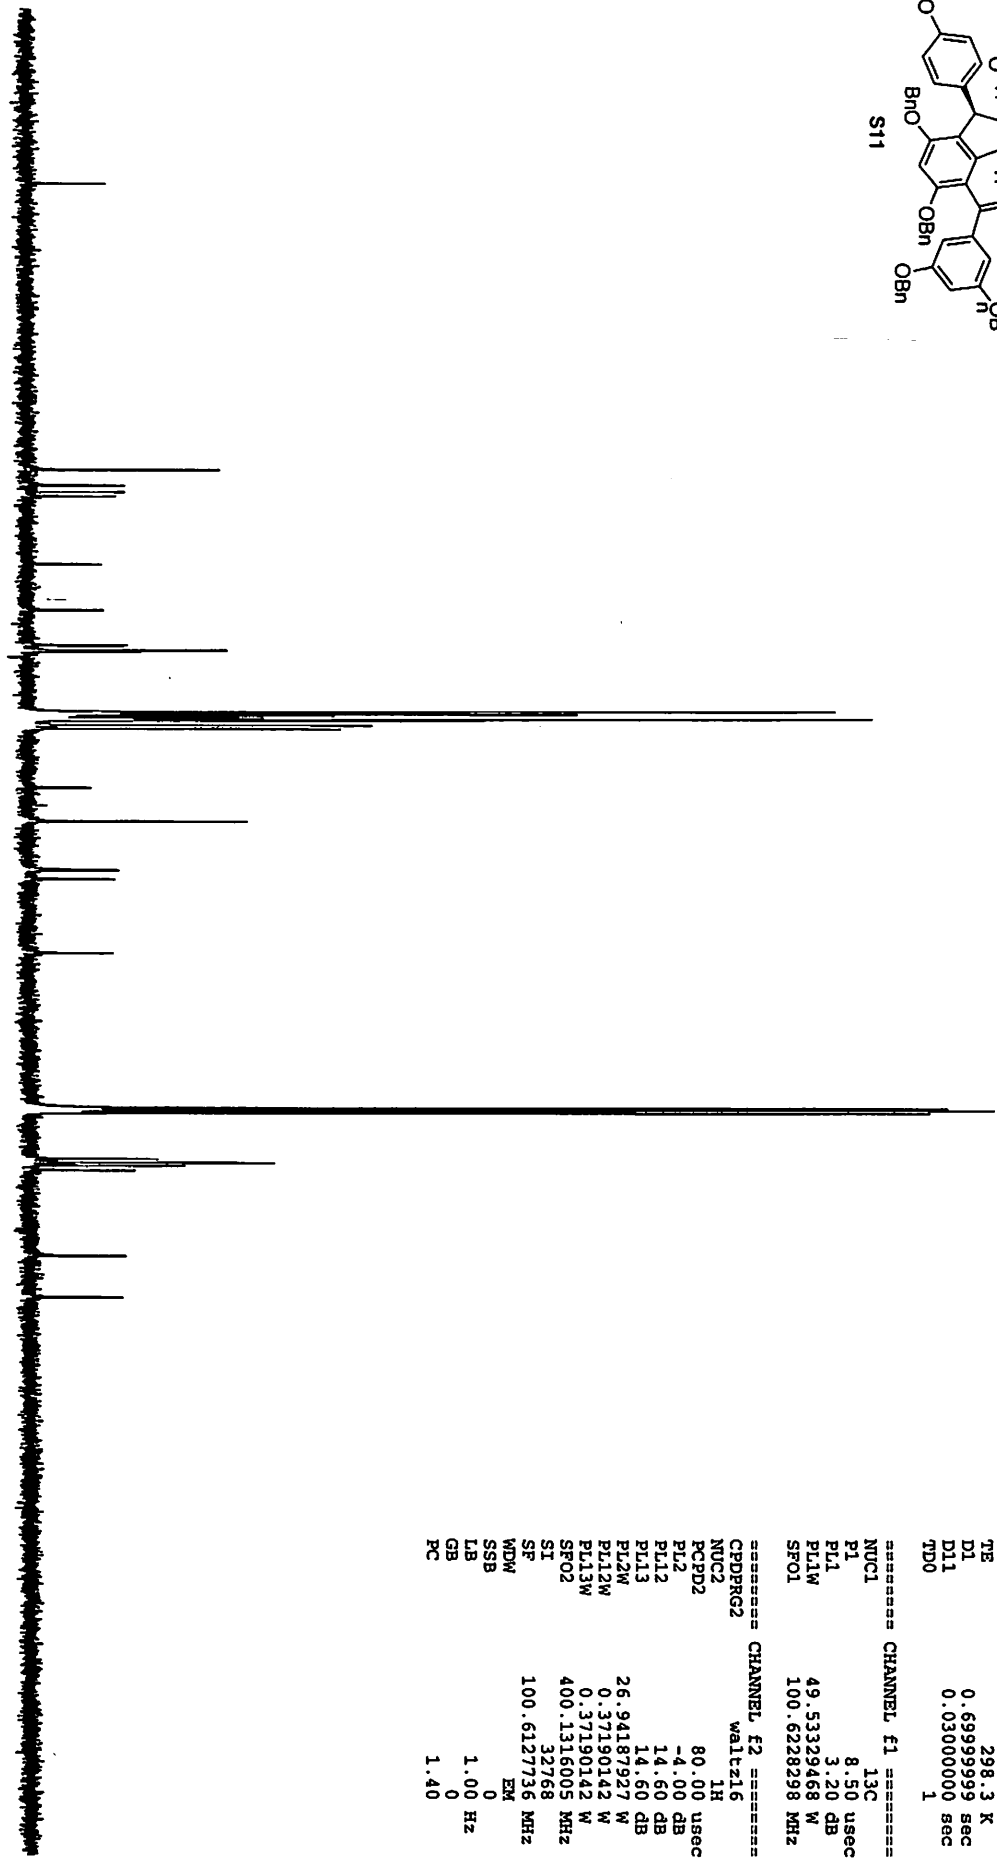

```

NAME          angol32  13C
EXPNO         1
PROCNO        1
Date_         20100519
Time          21.07
INSTRUM       spect
PROBHD        5 mm PABBO BB-
PULPROG       zgpg30
TD            32768
SOLVENT       CDCl3
NS            2135
DS            0
SMH           24038.461 Hz
FIDRES       0.733596 Hz
AQ           0.6816244 sec
RG            1820
DW           20.800 usec
DE           6.50 usec
TE           298.3 K
D1           0.69999999 sec
D11          0.03000000 sec
TD0           1

===== CHANNEL f1 =====
NUC1          13C
P1            8.50 usec
PL1           3.20 dB
PL1W          49.53328468 W
SFO1          100.628298 MHz

===== CHANNEL f2 =====
CPDPRG2       waltz16
NUC2          1H
PCPD2         80.00 usec
PL2           -4.00 dB
PL12          14.60 dB
PL13          14.60 dB
PL1W          26.94187927 W
PL12W         0.37190142 W
PL13W         0.37190142 W
SFO2          400.1316005 MHz
SI            32768
SF           100.6127736 MHz
WDW           EM
SSB           0
LB            1.00 Hz
GB            0
PC            1.40
  
```

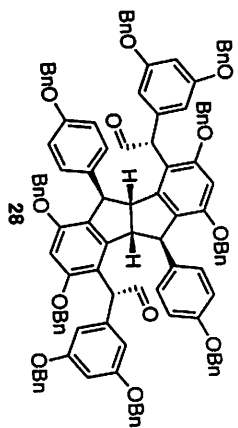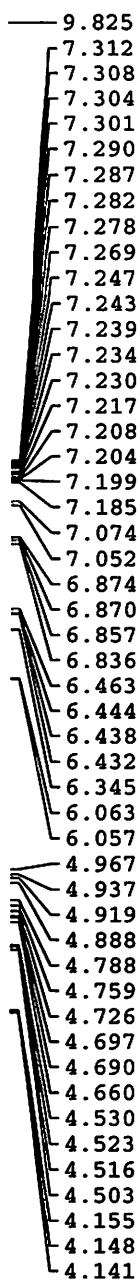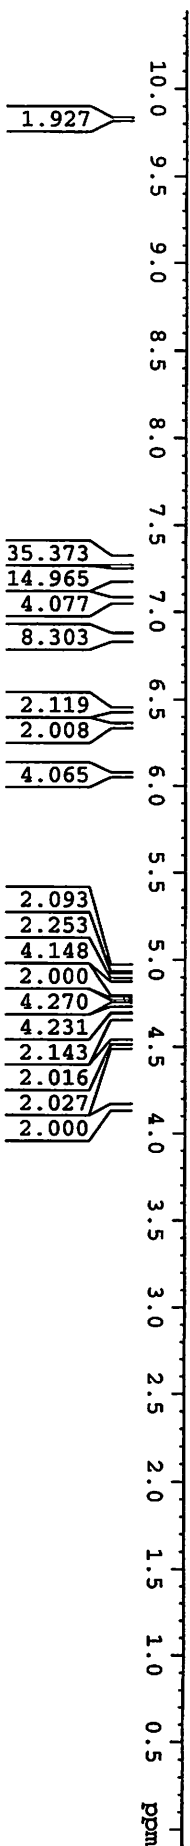

EXPNO 2  
PROCNO 1

F2 - Acquisition Parameters  
Date\_ 20100626  
Time 18.07  
INSTRUM spect  
PROBHD 5 mm PABBO BB-  
PULPROG zg30  
TD 32768  
SOLVENT CDCl3  
NS 32  
DS 0  
SWH 6009.615 Hz  
FIDRES 0.183399 Hz  
AQ 2.7263477 sec  
RG 512  
DW 83.200 usec  
DE 6.50 usec  
TE 298.2 K  
D1 1.00000000 sec  
TD0 1

===== CHANNEL f1 =====  
NUC1 1H  
P1 9.50 usec  
PL1 -4.00 dB  
PL1W 26.94187927 W  
SFO1 400.1328009 MHz

F2 - Processing parameters  
SI 32768  
SF 400.1300094 MHz  
WDW EM  
SSB 0  
LB 0.20 Hz  
GB 0  
PC 1.40

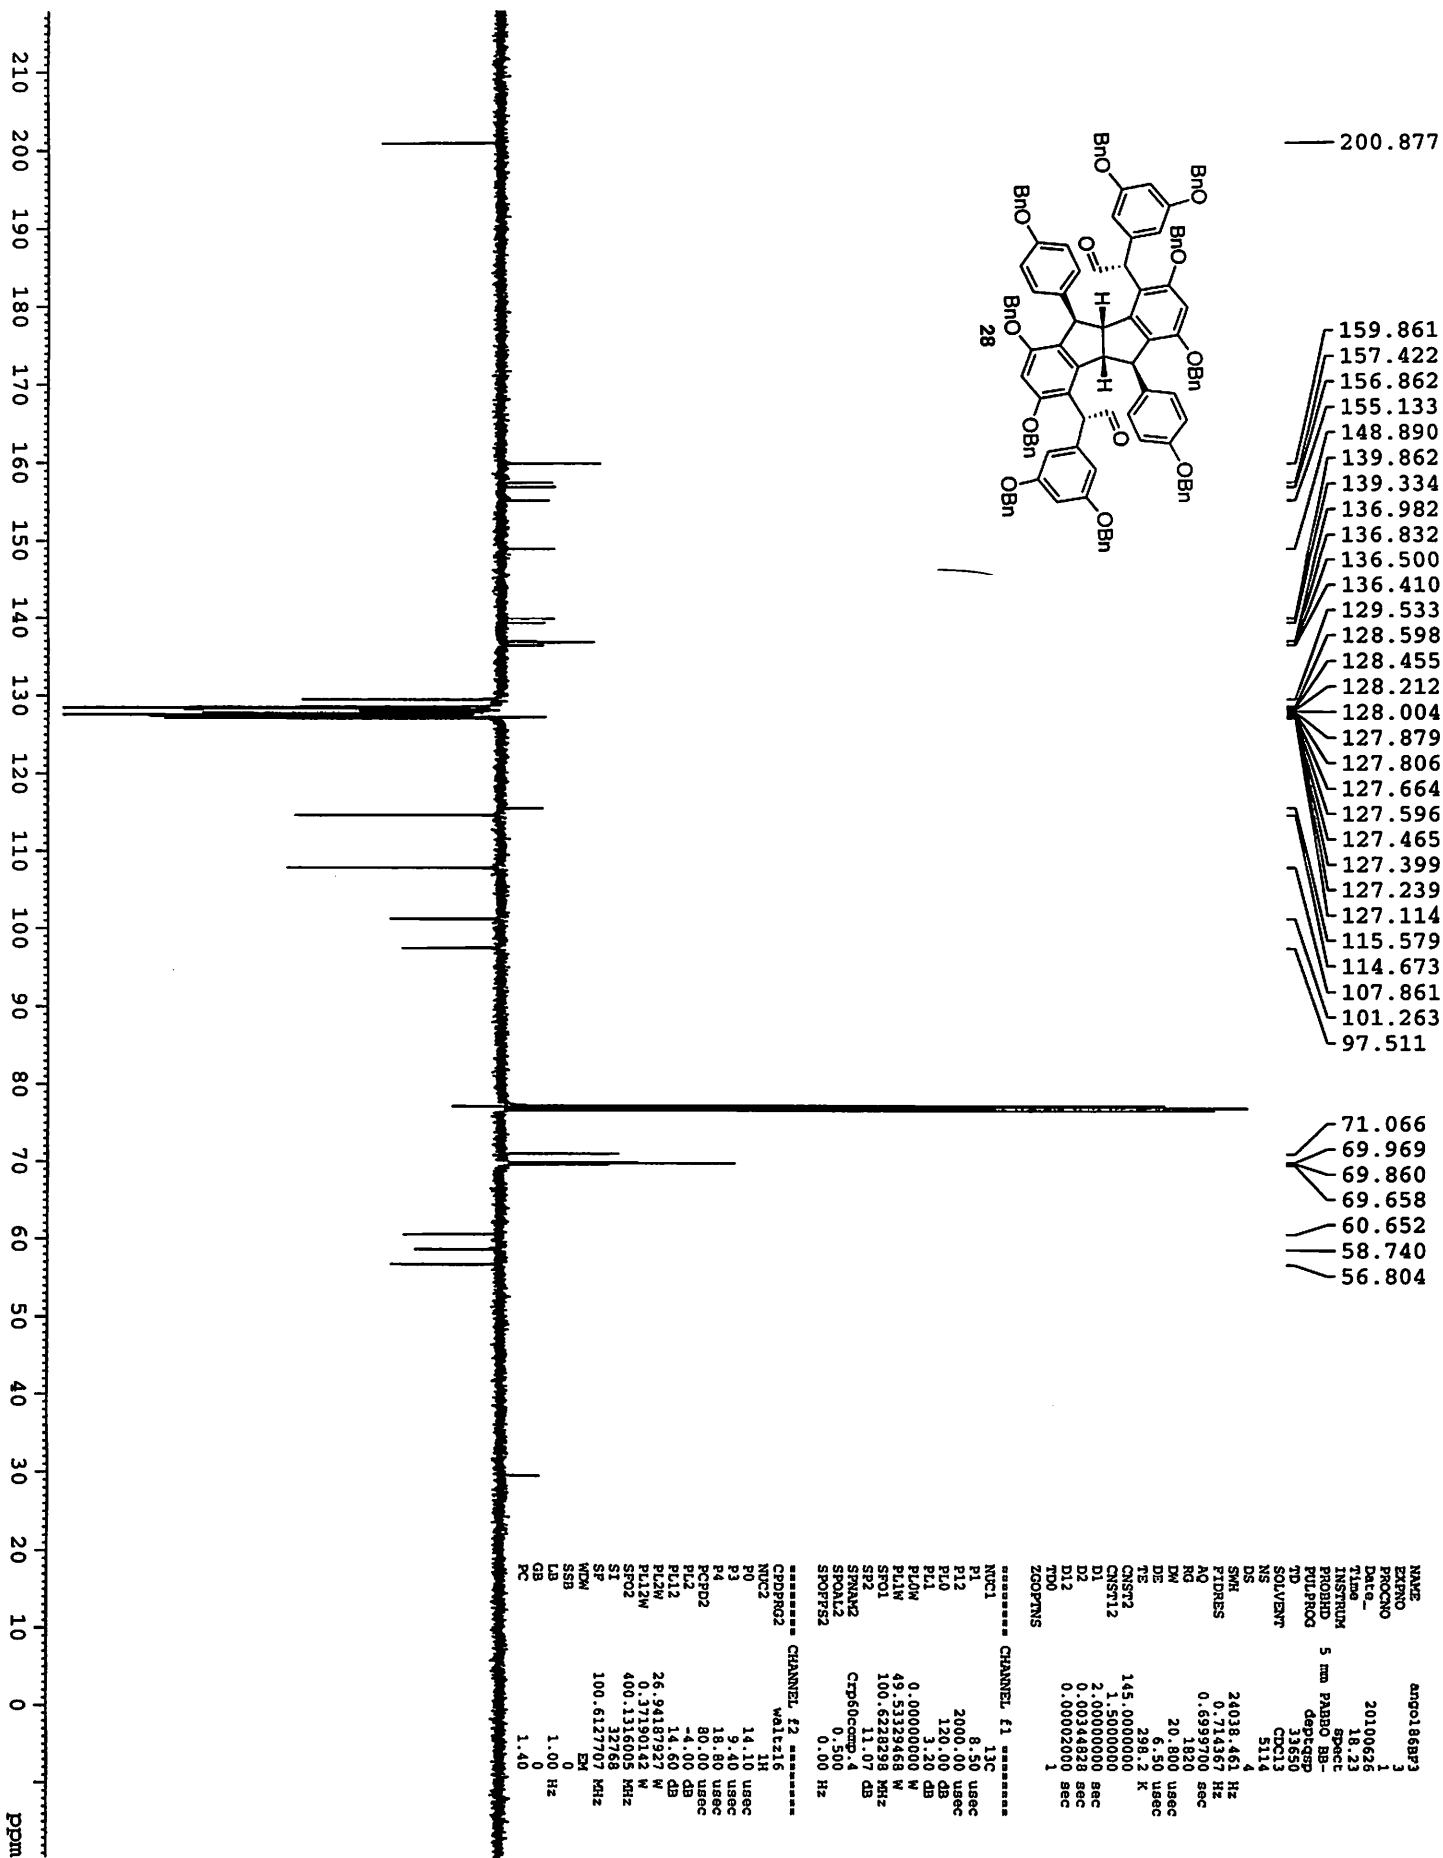

9.987  
9.789  
7.353  
7.334  
7.322  
7.312  
7.307  
7.290  
7.238  
7.228  
7.214  
7.193  
7.187  
7.179  
7.156  
7.012  
7.003  
6.996  
6.936  
6.921  
6.916  
6.906  
6.885  
6.844  
6.830  
6.825  
6.573  
6.558  
6.552  
6.497  
6.476  
6.461  
6.456  
6.450  
6.384  
6.380  
6.299  
6.245  
6.132  
6.127  
4.921  
4.912  
4.891  
4.861  
4.852  
4.826  
4.819  
4.789  
4.760  
4.742  
4.728  
4.715  
4.698  
4.687  
4.652  
4.622  
4.566  
4.536  
4.462  
4.462  
4.446  
4.442  
4.421  
4.335  
4.329  
4.316  
4.308  
4.157  
4.150

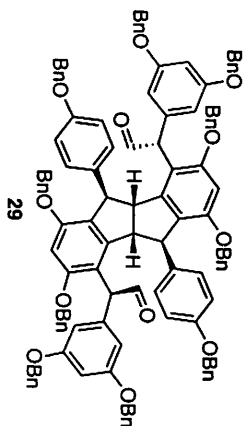

Current Data Parameters  
NAME ang0285  
EXPNO 6  
PROCNO 1

P2 - Acquisition Parameters  
Date\_ 20101201  
Time 21.29  
INSTRUM spect  
PROBHD 5 mm PABO BB  
PULPROG zgpg30  
TD 32768  
SOLVENT CDCl3  
NS 32  
DS 0  
SWH 6009.615 Hz  
FIDRES 0.183399 Hz  
AQ 2.7263477 sec  
RG 456  
DW 83.200 usec  
DE 6.50 usec  
TE 298.2 K  
D1 1.00000000 sec  
TD0 1

===== CHANNEL f1 =====  
NUC1 1H  
P1 9.50 usec  
PL1 -4.00 dB  
PL1W 26.94187927 W  
SFO1 400.1328009 MHz

P2 - Processing parameters  
SI 32768  
SF 400.1300092 MHz  
WDW EM  
SSB 0  
LB 0  
GB 0  
PC 1.00

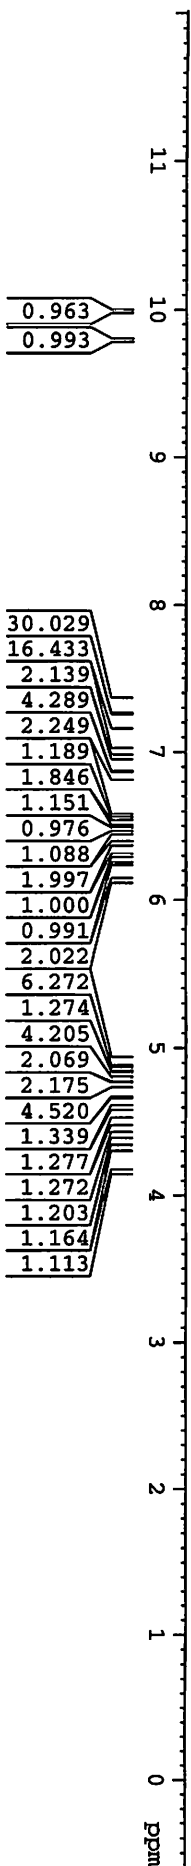

|         |
|---------|
| 201.394 |
| 201.192 |
| 160.003 |
| 159.931 |
| 157.638 |
| 157.417 |
| 157.363 |
| 156.935 |
| 156.870 |
| 155.301 |
| 154.937 |
| 154.914 |
| 148.555 |
| 148.398 |
| 139.998 |
| 139.202 |
| 139.044 |
| 138.047 |
| 137.042 |
| 137.020 |
| 136.817 |
| 136.577 |
| 136.555 |
| 136.539 |
| 136.416 |
| 136.299 |
| 129.370 |
| 128.845 |
| 128.548 |
| 128.523 |
| 128.493 |
| 128.465 |
| 128.399 |
| 128.294 |
| 128.186 |
| 127.958 |
| 127.906 |
| 127.856 |
| 127.848 |
| 127.820 |
| 127.784 |
| 127.703 |
| 127.632 |
| 127.501 |
| 127.420 |
| 127.149 |
| 127.000 |
| 126.886 |
| 115.734 |
| 114.690 |
| 114.040 |
| 113.375 |
| 108.052 |
| 107.499 |
| 101.300 |
| 101.165 |
| 97.580  |
| 97.346  |
| 71.027  |
| 70.516  |
| 69.978  |
| 69.870  |
| 69.823  |
| 69.637  |
| 69.415  |
| 59.967  |
| 59.713  |
| 58.325  |
| 58.290  |
| 57.039  |
| 54.324  |

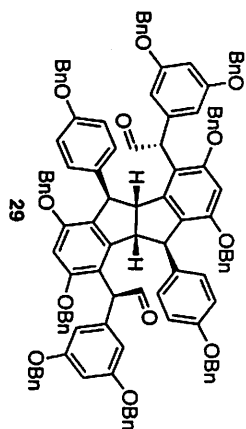

Current Data Parameters  
NAME: ang257  
EXRNO: 1  
PROCNO: 1

F2 - Acquisition Parameters  
Date\_: 20101201  
Time: 21.41  
INSTRUM: spect  
PROBHD: 5 mm PABO-BB-  
PULPROG: zgpg30  
TD: 13550  
SOLVENT: CDCl3  
NS: 13400  
DS: 4  
SWH: 24038.461 Hz  
FIDRES: 0.714367 Hz  
AQ: 0.699700 sec  
RG: 327.68  
DE: 20.800 usec  
TE: 298.3 K  
CNS12: 145.0000000  
CNS112: 1.5000000  
D1: 2.0000000 sec  
D2: 0.00144828 sec  
T2: 0.00002000 sec  
T2R3: 1  
ZCORN: 1

===== CHANNEL f1 =====  
NUC1: 13C  
P1: 8.50 usec  
PL1: 2000.00 usec  
PL0: 120.00 dB  
PL12: 3.20 dB  
PL1W: 0 W  
PL1W: 49.5329468 W  
SFO1: 100.628298 MHz  
SFO2: 11.07 dB  
SFOAL2: CIP60comp.4  
SFOFIS2: 0.500  
SFOFIS2: 0 Hz

===== CHANNEL f2 =====  
CPDPRG2: waltz16  
NUC2: 1H  
P0: 14.10 usec  
P3: 9.40 usec  
P4: 18.80 usec  
PCPD2: 80.00 usec  
PL12: 14.60 dB  
PL1W: 26.94187927 W  
PL1W: 0.37150142 W  
SFO2: 400.1316005 MHz

F2 - Processing Parameters  
SI: 32768  
SF: 100.6127700 MHz  
RG: EN  
NS: 0  
DS: 1.00 Hz  
DE: 0  
TE: 1.40

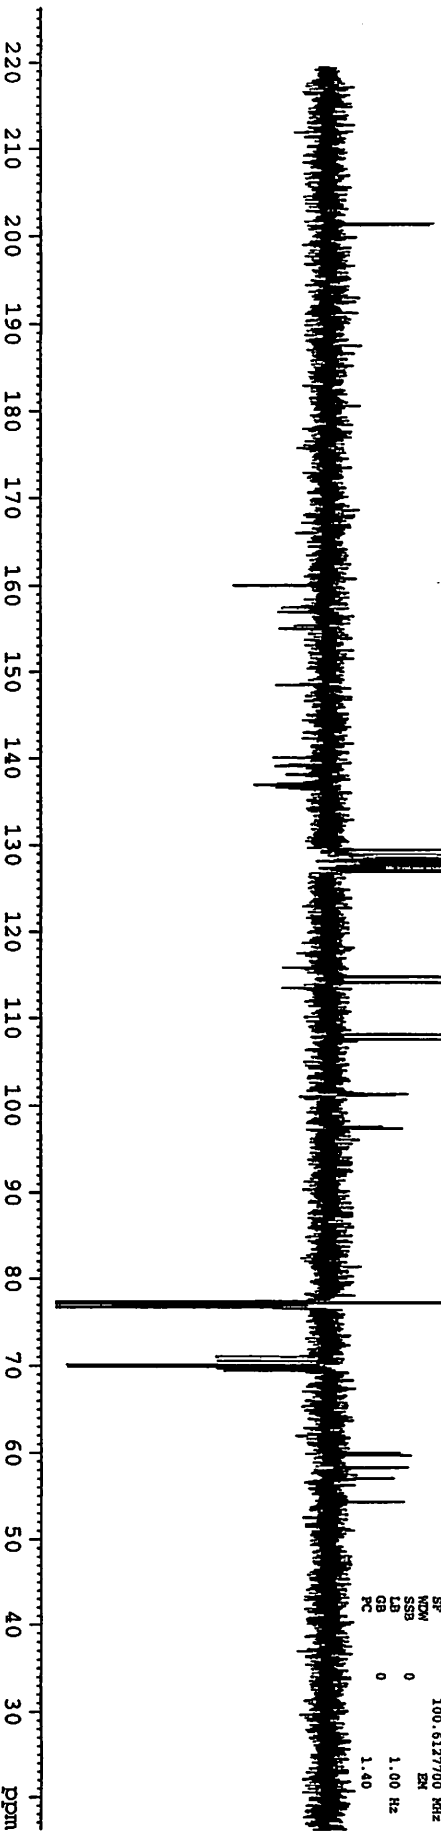

7.445  
7.442  
7.336  
7.327  
7.323  
7.321  
7.308  
7.302  
7.295  
7.292  
7.284  
7.278  
7.251  
7.248  
7.243  
7.232  
7.221  
7.216  
7.212  
7.208  
7.199  
7.189  
7.148  
7.140  
7.130  
7.125  
7.118  
7.109  
6.973  
6.951  
6.923  
6.901  
6.743  
6.721  
6.662  
6.623  
6.601  
6.452  
6.279  
6.274  
6.268  
5.859  
5.854  
5.744  
5.737  
5.718  
5.712  
5.139  
5.110  
5.042  
5.014  
4.954  
4.908  
4.879  
4.866  
4.822  
4.792  
4.635  
4.504  
4.476  
4.447  
4.438  
4.409  
4.145  
3.009  
3.002

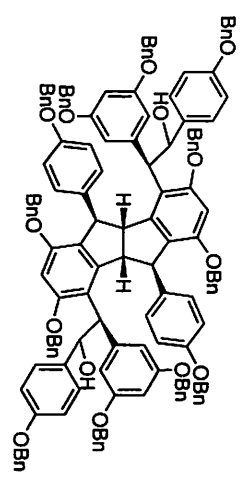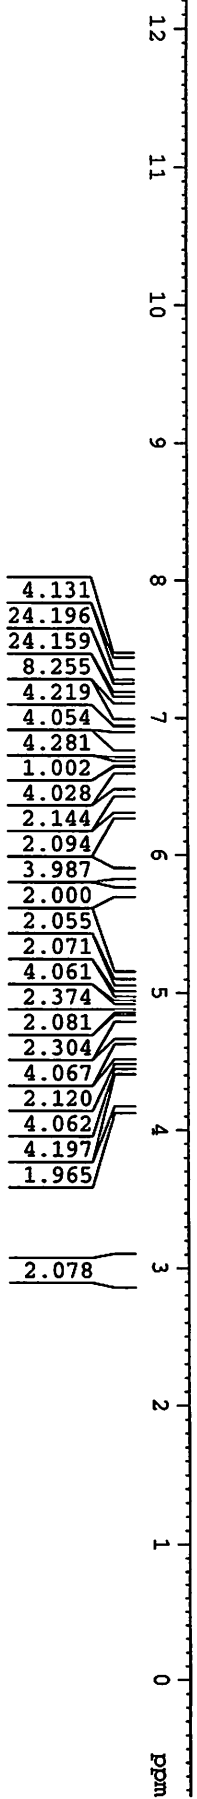

```

NAME          angol38 ufl
EXPNO         1
PROCNO        1
Date_         20100525
Time          19.11
INSTRUM       spect
PROBHD        5 mm PABBI 1H/
PULPROG       zg30
TD            32768
SOLVENT       CDCl3
NS            13
DS            0
SWH           6009.615 Hz
FIDRES        0.183399 Hz
AQ            2.7263477 sec
RG            128
DW            83.200 usec
DE            6.50 usec
TE            300.0 K
D1            1.00000000 sec
TD0           1

===== CHANNEL f1 =====
NUC1          1H
P1            7.25 usec
PL1           0.00 dB
PL1W          12.20776844 W
SFO1          399.9225995 MHz
SI            32768
SF            399.9200103 MHz
WDW           EM
SSB           0
LB            0.20 Hz
GB            0
PC            1.00
  
```

159.071  
157.938  
157.727  
156.928  
154.237  
148.574  
144.016  
139.009  
137.102  
136.980  
136.906  
136.495  
135.387  
129.558  
128.821  
128.674  
128.504  
128.384  
128.343  
127.822  
127.754  
127.589  
127.419  
127.391  
118.045  
114.027  
113.733  
108.091  
101.074  
98.084

75.437  
71.604  
70.036  
69.731  
69.670  
58.926  
57.043  
55.614

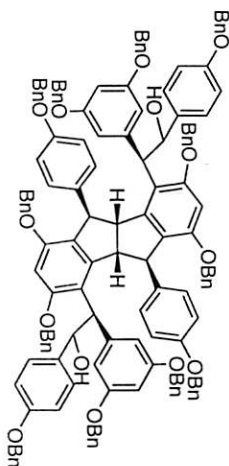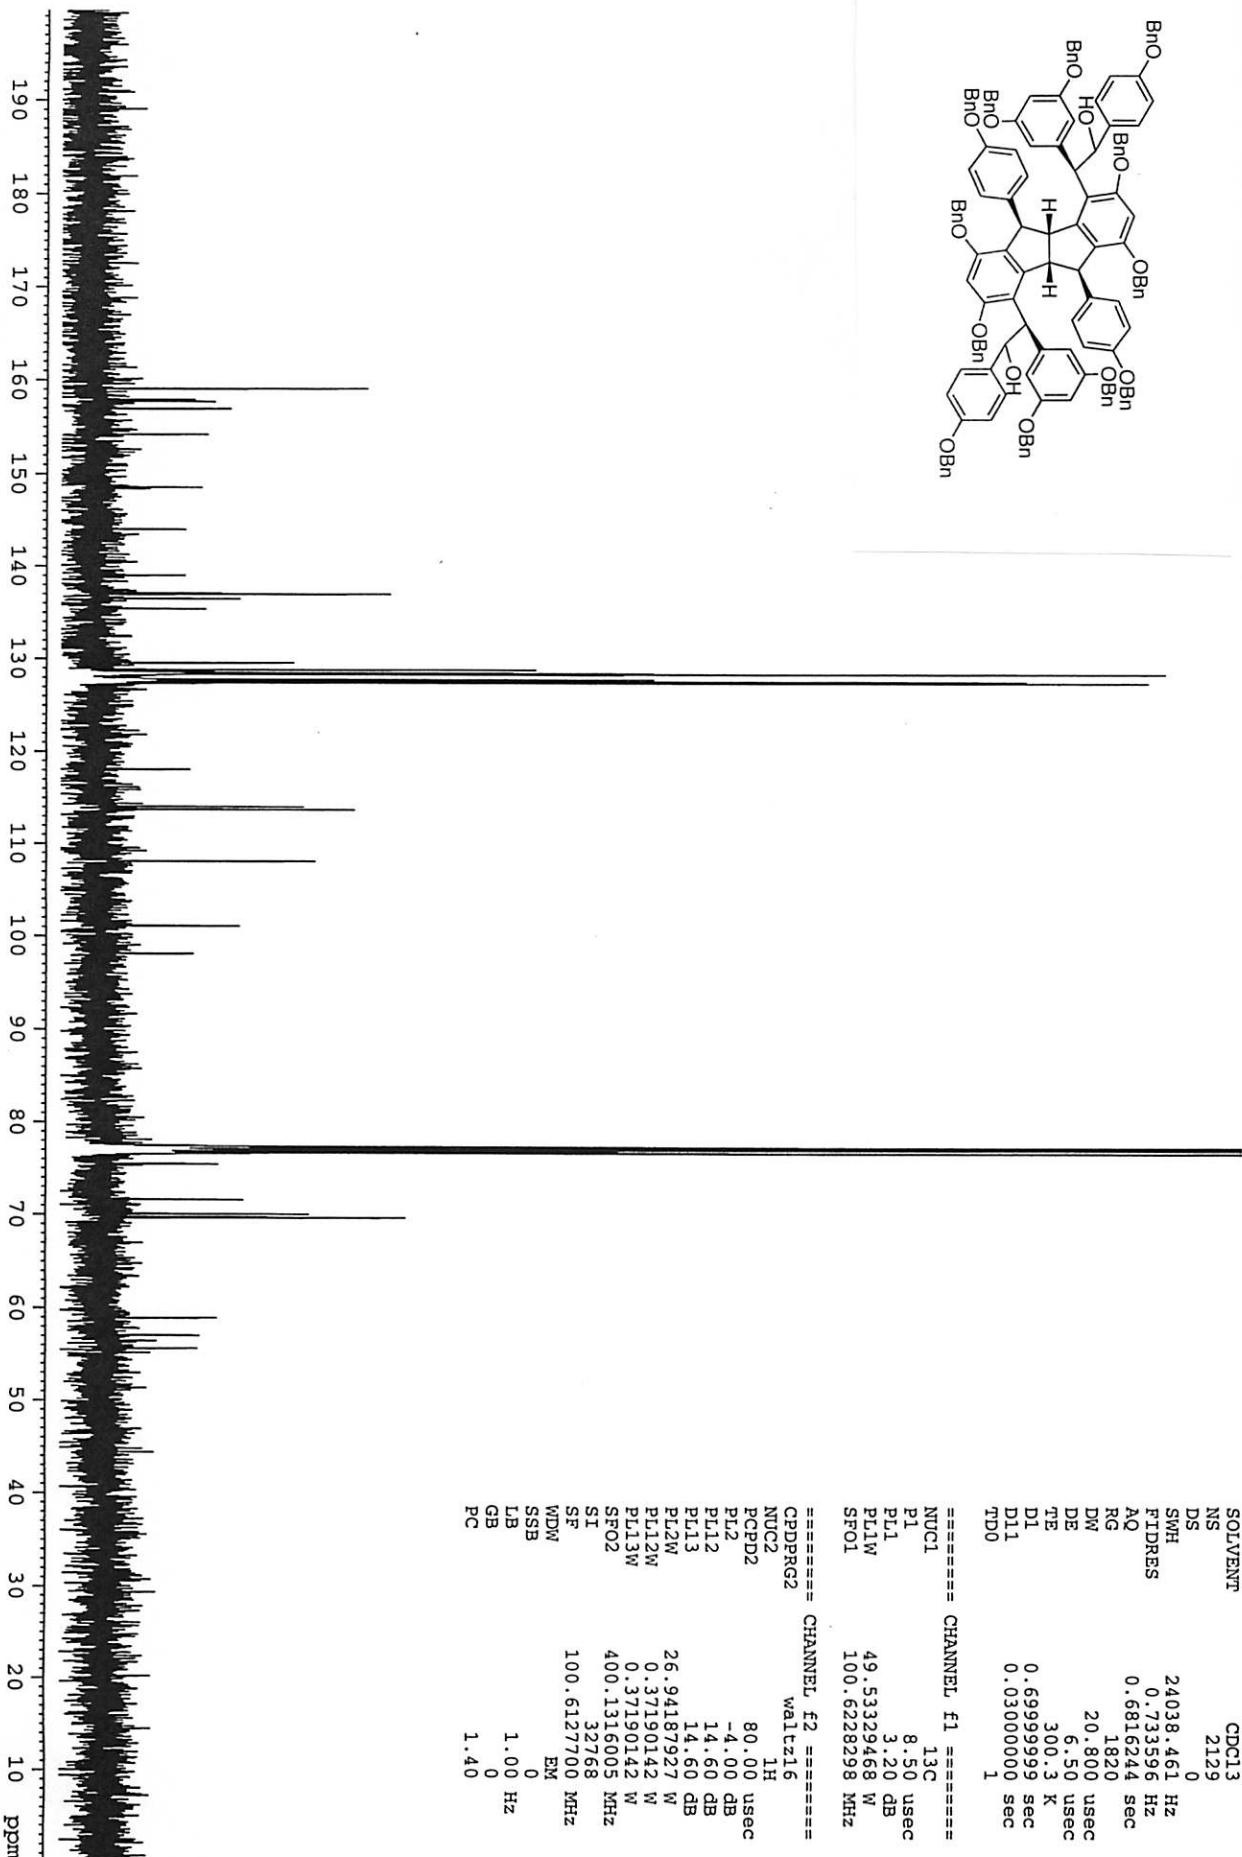

```

NAME          angol138UFL
EXPNO         2
PROCNO        1
Date_         20100526
Time_         18.22
INSTRUM       spect
PROBHD        5 mm PABBO BB-
PULPROG       zgpg30
TD            32768
SOLVENT       CDCl3
NS            2129
DS            0
SWH           24038.461 Hz
FIDRES       0.733596 Hz
AQ           0.6816244 sec
RG           1820
DW           20.800 usec
DE           6.50 usec
TE           300.3 K
D1           0.6999999 sec
D11          0.03000000 sec
TD0          1

===== CHANNEL f1 =====
NUC1          13C
P1            8.50 usec
PL1           3.20 dB
PL1W          49.53329468 W
SFO1         100.6228298 MHz

===== CHANNEL f2 =====
CPDPRG2       waltz16
NUC2          1H
PCPD2         80.00 usec
PL2           -4.00 dB
PL12          14.60 dB
PL13          14.60 dB
PL2W          26.94187927 W
PL12W         0.37190142 W
PL13W         0.37190142 W
SFO2         400.1316005 MHz
SI            32768
SF           100.6127700 MHz
WDW           EM
SSB           0
LB            1.00 Hz
GB            0
PC            1.40
  
```

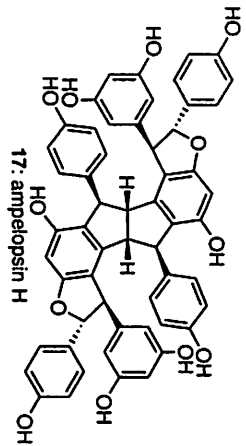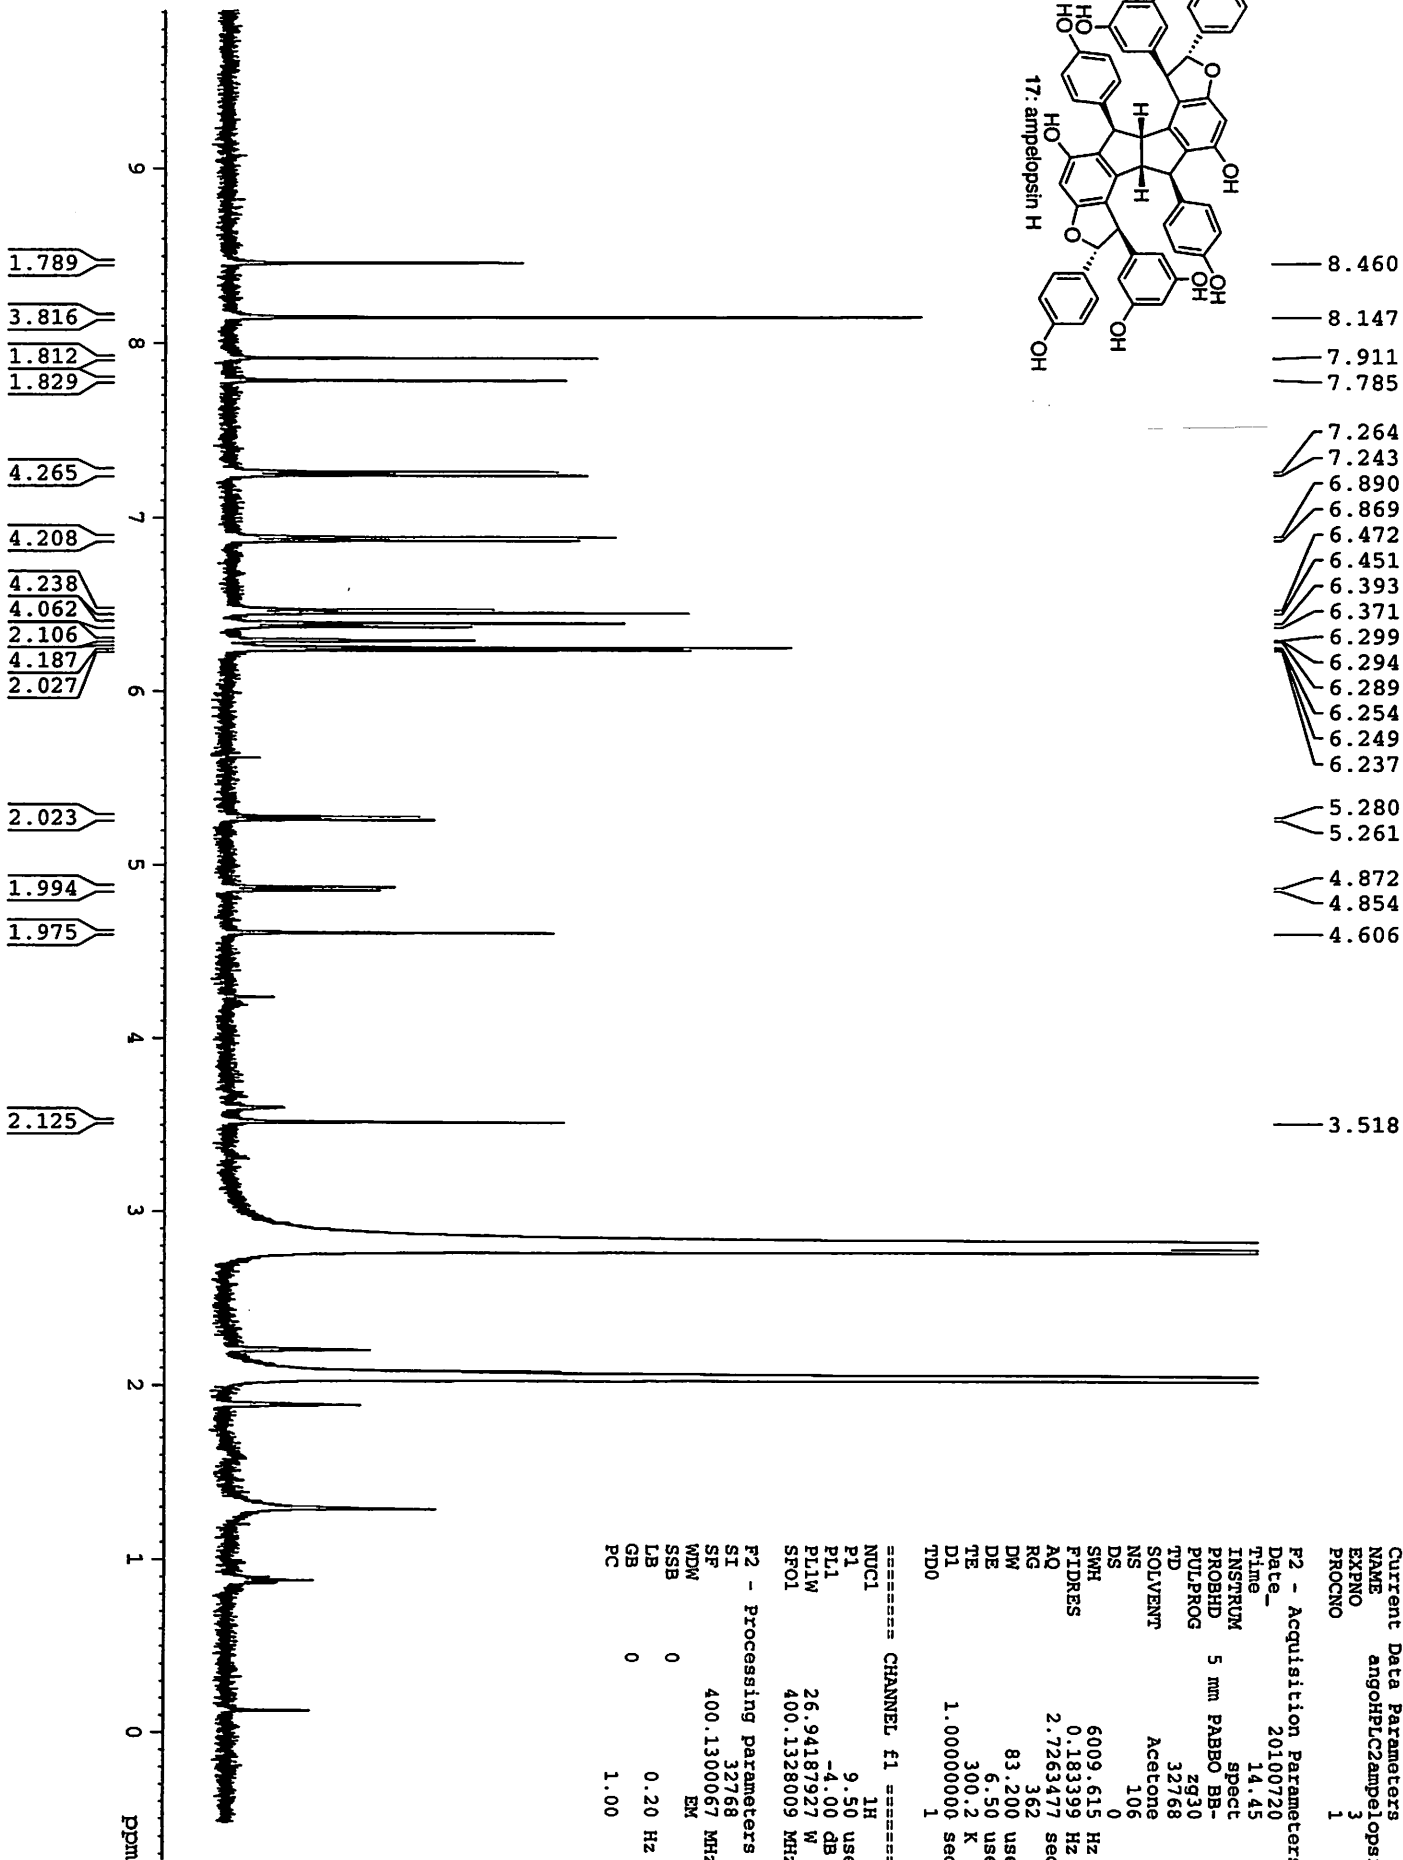

Current Data Parameters

| NAME                | EXPNO | PROCNO |
|---------------------|-------|--------|
| angohPLC2ampelopsin | 3     | 1      |

F2 - Acquisition Parameters

| Date_    | Time  |
|----------|-------|
| 20100720 | 14.45 |

INSTRUM spect

PROBHD 5 mm PABBO BB-

PULPROG zg30

TD 32768

SOLVENT Acetone

NS 106

DS 0

SWH 6009.615 Hz

FIDRES 0.183399 Hz

AQ 2.7263477 sec

RG 362

DW 83.200 usec

DE 6.50 usec

TE 300.2 K

D1 1.00000000 sec

TDO 1

===== CHANNEL f1 =====

| NUC1 | 1H              |
|------|-----------------|
| P1   | 9.50 usec       |
| PL1  | -4.00 dB        |
| PLW  | 26.94187927 W   |
| SFO1 | 400.1328009 MHz |

F2 - Processing Parameters

| SI  | 32768           |
|-----|-----------------|
| SF  | 400.1300057 MHz |
| WDW | EM              |
| SSB | 0               |
| LB  | 0.20 Hz         |
| GB  | 0               |
| PC  | 1.00            |

162.897  
160.108  
158.406  
156.057  
155.473  
145.408  
145.213  
136.582  
133.278  
129.179  
128.798  
125.310  
116.553  
116.207  
115.459  
107.586  
102.332  
96.989  
94.774  
59.523  
57.134  
49.426

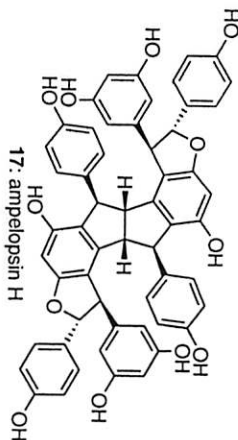

Current Data Parameters  
NAME Ampelopsin-H  
EXNO 12  
PROCNO 999

F2 - Acquisition Parameters  
Date\_ 20100810  
Time 2.30

INSTRUM spect  
PROBHD 5 mm CPDUL 13C  
PULPROG zgpg30  
TD 134144  
SOLVENT Acetone  
NS 5120  
DS 2  
SWH 39062.500 Hz  
FIDRES 0.291198 Hz  
AQ 1.7170932 sec  
RG 203  
DE 12.800 usec  
TE 25.82 usec  
D1 297.2 K  
D11 2.00000000 sec  
TD0 0.03000000 sec  
1

===== CHANNEL f1 =====  
NUC1 13C  
P1 10.25 usec  
PL1 3.10 dB  
SFO1 150.9209173 MHz

===== CHANNEL f2 =====  
CPDPRG2 waltz16  
NUC2 1H  
PCPD2 70.00 usec  
PL2 3.40 dB  
PL12 16.00 dB  
PL13 16.00 dB  
PL2W 7.46299839 W  
PL12W 0.41012228 W  
PL13W 0.41012228 W  
SFO2 600.1324005 MHz

F2 - Processing Parameters  
SI 65536  
SF 150.9026668 MHz  
WDW EM  
SSB 0  
LB 1.00 Hz  
GB 0  
PC 1.40

230 220 210 200 190 180 170 160 150 140 130 120 110 100 90 80 70 60 50 40 30 20 ppm

- 8.610
- 8.477
- 8.294
- 8.287
- 8.112
- 8.026
- 7.940
- 7.338
- 7.328
- 7.225
- 7.215
- 7.188
- 6.950
- 6.940
- 6.832
- 6.822
- 6.614
- 6.603
- 6.473
- 6.463
- 6.362
- 6.352
- 6.337
- 6.320
- 6.274
- 6.194
- 5.372
- 5.290
- 5.281
- 4.938
- 4.928
- 4.640
- 4.479
- 4.369
- 3.746
- 3.739
- 3.697
- 3.689

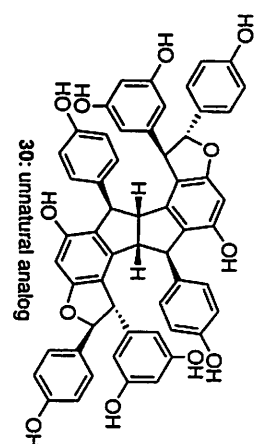

Current Data Parameters  
NAME anti-micro  
EXPNO 1  
PROCNO 1

F2 - Acquisition Parameters  
Date\_ 20100624  
Time 11.29  
INSTRUM spect  
PROBHD 1.7 mm CPTCI 1  
PULPROG zg30  
TD 65536  
SOLVENT Acetone  
NS 90  
DS 2  
SWH 16501.650 Hz  
FIDRES 0.251795 Hz  
AQ 1.9858211 sec  
RG 4  
DW 30.300 usec  
DE 6.50 usec  
TE 289.9 K  
D1 1.0000000 sec  
TD0 1

===== CHANNEL f1 =====  
NUC1 1H  
P1 10.40 usec  
PL1 14.80 dB  
PL1W 0.34934077 W  
SFO1 800.3549425 MHz

F2 - Processing parameters  
SI 32768  
SF 800.3499845 MHz  
WDW EM  
SSB 0  
LB 0.30 Hz  
GB 0  
PC 1.00

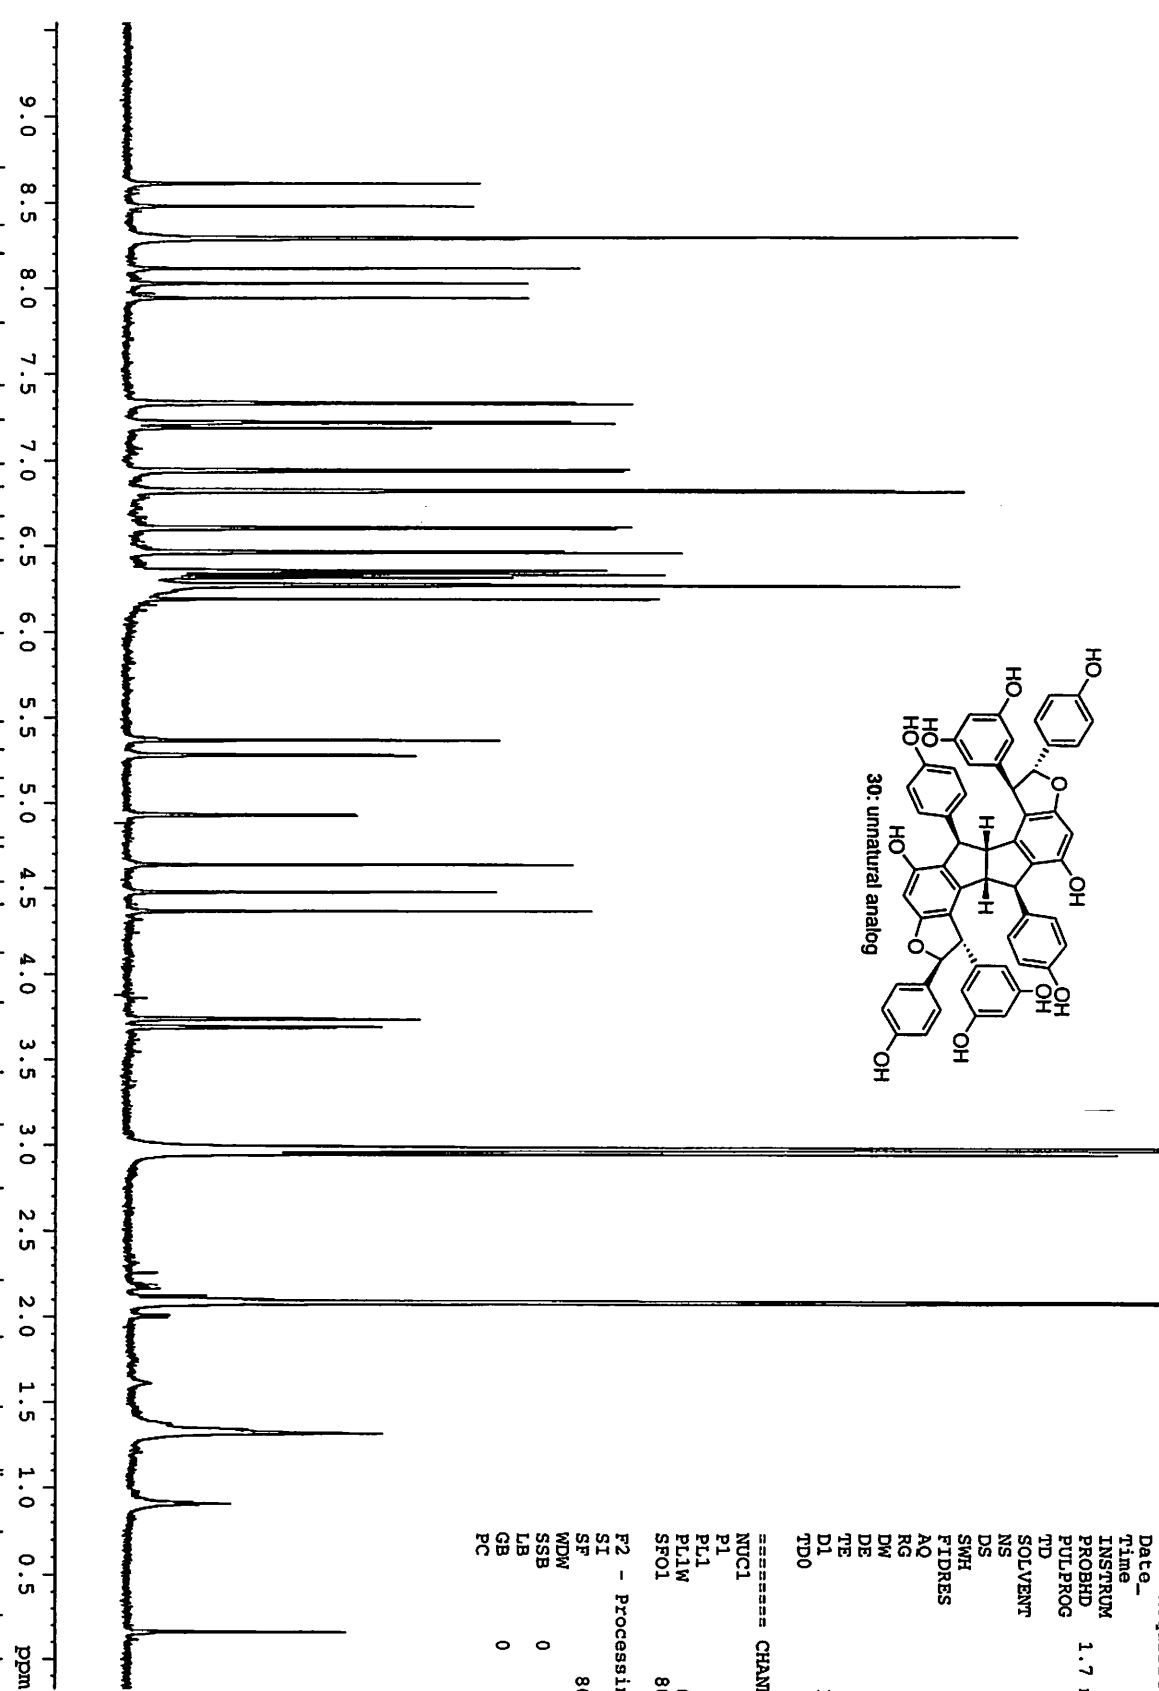

- 1.448
- 3.051
- 2.394
- 1.748
- 2.378
- 1.839
- 3.538
- 1.908
- 1.904
- 8.571
- 0.814
- 0.741
- 0.739
- 0.779
- 0.775
- 0.852
- 1.696
- 33.087
- 16.192
- 0.590
- 3.279
- 1.040
- 0.595

162.613  
162.437  
161.687  
159.329  
159.175  
157.467  
157.147  
155.142  
154.734  
154.525  
148.022  
147.610  
144.611  
144.498  
143.505  
137.168  
136.025  
133.756  
132.638  
132.459  
128.233  
128.141  
127.827  
126.488  
125.294  
124.391  
115.713  
115.307  
115.217  
114.694  
114.460  
106.570  
105.360  
101.323  
96.057  
95.764  
93.658  
92.936

59.157  
59.005  
56.120  
55.921  
49.328  
48.197

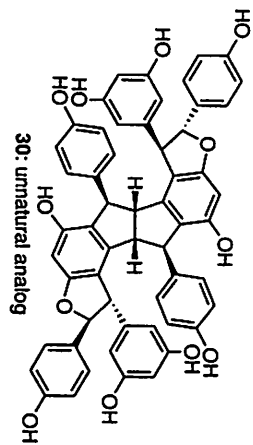

Current Data Parameters  
NAME anal-micro  
EXPNO 6  
PROCNO 1

F2 - Acquisition Parameters  
Date\_ 20100625  
Time 7.02

INSTRUM spect  
PROBHD 1.7 mm CPXI 1  
PULPROG zgpg30  
TD 65536  
SOLVENT Acetone  
NS 2000  
DS 4  
SWH 48076.922 Hz  
FIDRES 0.733596 Hz  
AQ 0.6816348 sec  
RG 32768  
DM 10.400 usec  
DE 6.50 usec  
TE 290.0 K  
D1 1.00000000 sec  
D11 0.03000000 sec  
TD0 1

===== CHANNEL f1 =====  
NUC1 13C  
P1 12.00 usec  
PL1 -2.00 dB  
PL1W 131.3753621 W  
SFO1 201.2682924 MHz

===== CHANNEL f2 =====  
CPDPRG2 waltz16  
NUC2 1H  
PCPD2 60.00 usec  
PL2 14.80 dB  
PL12 32.00 dB  
PL13 32.00 dB  
PL2W 0.34934077 W  
PL12W 0.00665655 W  
PL13W 0.00665655 W  
SFO2 800.3532014 MHz

F2 - Processing parameters  
SI 32768  
SF 201.2481680 MHz  
WDW EM  
SSB 0  
LB 1.00 Hz  
GB 0  
PC 1.00

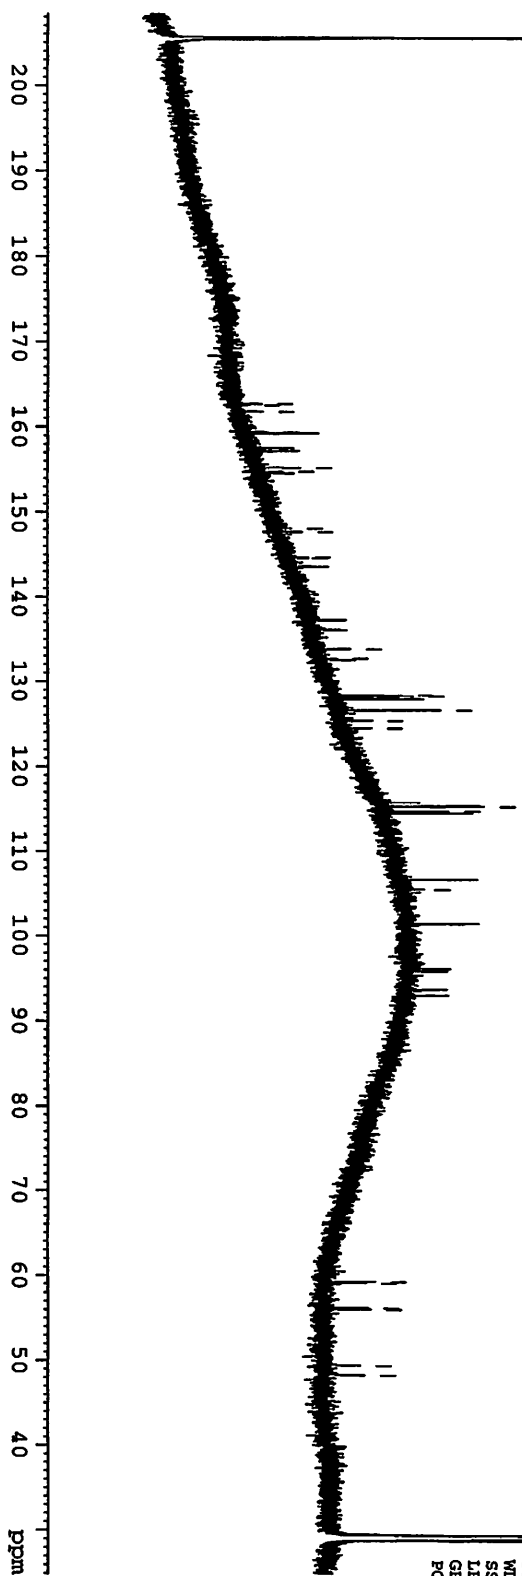

Current Data Parameters  
NAME mic\_III\_perme\_amp\_f\_2  
EXPNO 5  
PROCNO 1

# F2 - Acquisition Parameters

Date\_ 20100915  
Time 11.26  
INSTRUM spect  
PROBHD 5 mm PABBO BB-  
PULPROG zg30  
TD 32768  
SOLVENT CDCl3  
NS 6  
DS 0  
SWH 6009.615 Hz  
FIDRES 0.183399 Hz  
AQ 2.7263477 sec  
RG 144  
DW 83.200 usec  
DE 6.50 usec  
TE 298.2 K  
D1 1.00000000 sec  
TD0 1

# ===== CHANNEL f1 =====

NUC1 1H  
P1 9.50 usec  
PL1 -4.00 dB  
PL1W 26.94187927 W  
SFO1 400.1328009 MHz

# F2 - Processing parameters

SI 32768  
SF 400.130088 MHz  
WDW EM  
SSB 0  
LB 0.20 Hz  
GB 0  
PC 1.00

7.125  
7.104  
6.848  
6.840  
6.827  
6.818  
6.667  
6.645  
6.582  
6.578  
6.530  
6.525  
6.262  
6.256  
6.192  
6.188

4.221  
4.193  
3.837  
3.805  
3.767  
3.746  
3.738  
3.682  
3.436

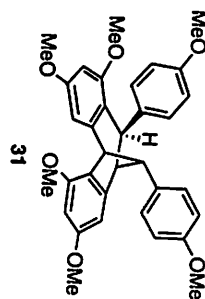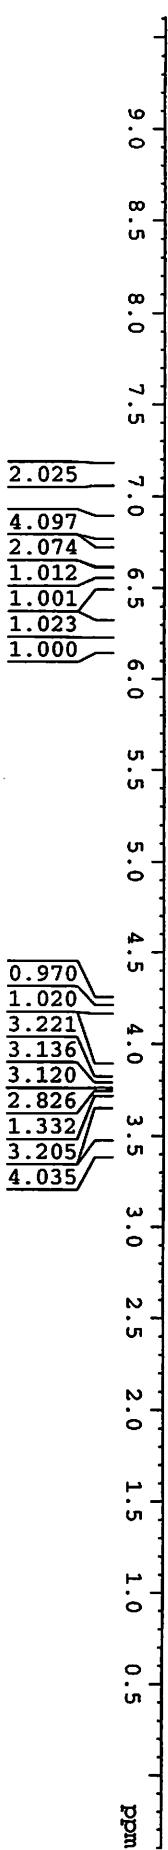

Current Data Parameters  
 NAME mic\_III\_perme\_amp\_f\_2\_c  
 EXPNO 5  
 PROCNO 1

F2 - Acquisition Parameters  
 Date\_ 20100915  
 Time 11.29

INSTRUM spect  
 PROBD 5 mm PABBO BB-  
 PULPROG zgpg  
 TD 32768  
 SOLVENT CDCl3  
 NS 3135  
 DS 0  
 SMH 24038.461 Hz  
 FIDRES 0.733596 Hz  
 AQ 0.6816244 sec  
 RG 1820  
 DW 20.800 usec  
 DE 6.50 usec  
 TE 298.3 K  
 D1 0.69999999 sec  
 D11 0.03000000 sec  
 TD0 1

===== CHANNEL f1 =====  
 NUC1 13C  
 P1 8.50 usec  
 PL1 3.20 dB  
 PL1W 49.53329468 W  
 SFO1 100.6228298 MHz

===== CHANNEL f2 =====  
 CPDPRG2 waltz16  
 NUC2 1H  
 PCPD2 80.00 usec  
 PL2 -4.00 dB  
 PL12 14.60 dB  
 PL13 14.60 dB  
 PL12W 26.94187927 W  
 PL12W 0.37190142 W  
 PL13W 0.37190142 W  
 SFO2 400.1316005 MHz

F2 - Processing parameters  
 SI 32768  
 SF 100.6127575 MHz  
 WDW EM  
 SSB 0  
 LB 1.00 Hz  
 GB 0  
 PC 1.40

160.632  
 159.579  
 159.021  
 157.737  
 157.568  
 155.026  
 146.200  
 145.615  
 139.180  
 135.630  
 129.820  
 128.832  
 128.585  
 115.865  
 113.480  
 103.143  
 101.482  
 97.123  
 97.053

57.346  
 55.562  
 55.453  
 55.417  
 55.317  
 55.234  
 49.932  
 49.088  
 46.294

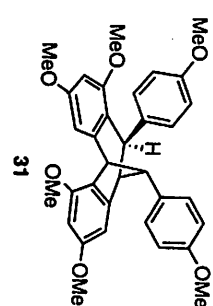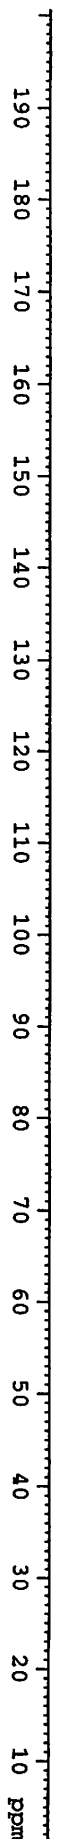

7.072  
7.051  
6.850  
6.829  
6.823  
6.801  
6.664  
6.642  
6.560  
6.556  
6.296  
6.184  
6.179

4.980

4.237  
4.233  
3.878  
3.798  
3.769  
3.723  
3.680  
3.440  
3.384

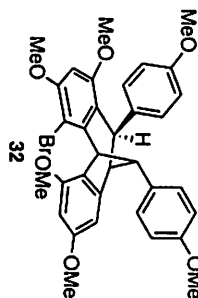

Current Data Parameters  
NAME mic\_III\_monobp\_pure  
EXPNO 5  
PROCNO 1

F2 - Acquisition Parameters  
Date\_ 20100909

Time 18.25

INSTRUM spect

PROBHD 5 mm PABBO BB-

PULPROG zg30

TD 32768

SOLVENT CDCl3

NS 3

DS 0

SWH 6009.615 Hz

FIDRES 0.18339 Hz

AQ 2.7263477 sec

RG 322

DW 83.200 usec

DE 6.50 usec

TE 295.7 K

D1 1.0000000 sec

TD0 1

===== CHANNEL f1 =====

NUC1 1H

P1 9.50 usec

PL1 -4.00 dB

PL1W 26.94187927 W

SFO1 400.1328009 MHz

F2 - Processing parameters

SI 32768

SF 400.1300098 MHz

WDW EM

SSB 0

LB 0.20 Hz

GB 0

PC 1.00

1.867  
1.829  
2.445  
2.074  
1.037  
1.000  
1.008  
0.892  
1.007  
3.028  
2.977  
3.567  
3.140  
4.602  
2.711  
1.193

ppm

Current Data Parameters  
 NAME mic\_iii\_monobr\_pure\_c  
 EXPNO 5  
 PROCNO 1

F2 - Acquisition Parameters  
 Date\_ 20100909  
 Time 18.31  
 INSTRUM spect  
 PROBD 5 mm PABBO BB-  
 PULPROG zgpg  
 TD 32768  
 SOLVENT CDCl3  
 NS 4370  
 DS 0  
 SWH 24038.461 Hz  
 FIDRES 0.733596 Hz  
 AQ 0.6816244 sec  
 RG 1820  
 DW 20.800 usec  
 DE 6.50 usec  
 TE 295.8 K  
 D1 0.6999999 sec  
 D11 0.0300000 sec  
 TD0 1

===== CHANNEL f1 =====  
 NUC1 13C  
 P1 8.50 usec  
 PL1 3.20 dB  
 PL1W 49.53328468 W  
 SFO1 100.6228298 MHz

===== CHANNEL f2 =====  
 CPDPRG2 waltz16  
 NUC2 1H  
 PCPD2 80.00 usec  
 PL2 -4.00 dB  
 PL12 14.60 dB  
 PL13 14.60 dB  
 PL2W 26.94187927 W  
 PL12W 0.37190142 W  
 PL13W 0.37190142 W  
 SFO2 400.1316005 MHz

F2 - Processing parameters  
 SI 32768  
 SF 100.6127554 MHz  
 WDW EM  
 SSB 0  
 LB 1.00 Hz  
 GB 0  
 PC 1.40

160.856  
 158.451  
 157.831  
 157.646  
 155.660  
 155.182  
 146.266  
 145.244  
 139.089  
 135.263  
 128.838  
 128.715  
 128.670  
 118.333  
 113.924  
 113.536  
 102.292  
 101.148  
 97.069  
 95.371

57.056  
 56.452  
 55.615  
 55.563  
 55.346  
 55.291  
 49.766  
 47.913  
 46.358

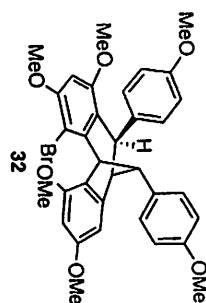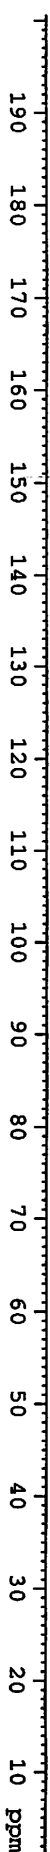

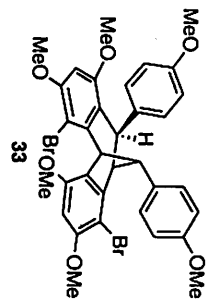

7.136  
7.115  
6.882  
6.861  
6.826  
6.805  
6.687  
6.666  
6.320  
6.193

5.075

4.372

3.884  
3.827  
3.789  
3.730  
3.684  
3.453

Current Data Parameters  
NAME ango232B  
EXPNO 1  
PROCNO 1

F2 - Acquisition Parameters  
Date\_ 20100908  
Time 13.10

INSTRUM spect  
PROBHD 5 mm PABBO BB-

PULPROG zg30  
TD 32768

SOLVENT CDC13  
NS 32

DS 0  
SWH 6009.615 Hz

FIDRES 0.183399 Hz  
AQ 2.7263477 sec

RG 114  
DW 83.200 usec

DE 6.50 usec  
TE 298.2 K

D1 1.0000000 sec  
TD0 1

===== CHANNEL f1 =====  
NUC1 1H  
P1 9.50 usec  
PL1 -4.00 dB  
PL1W 26.94187927 W  
SFO1 400.1328009 MHz

F2 - Processing parameters  
SI 32768  
SF 400.1300080 MHz  
WDW EM  
SSB 0  
LB 0.20 Hz  
GB 0  
PC 1.00

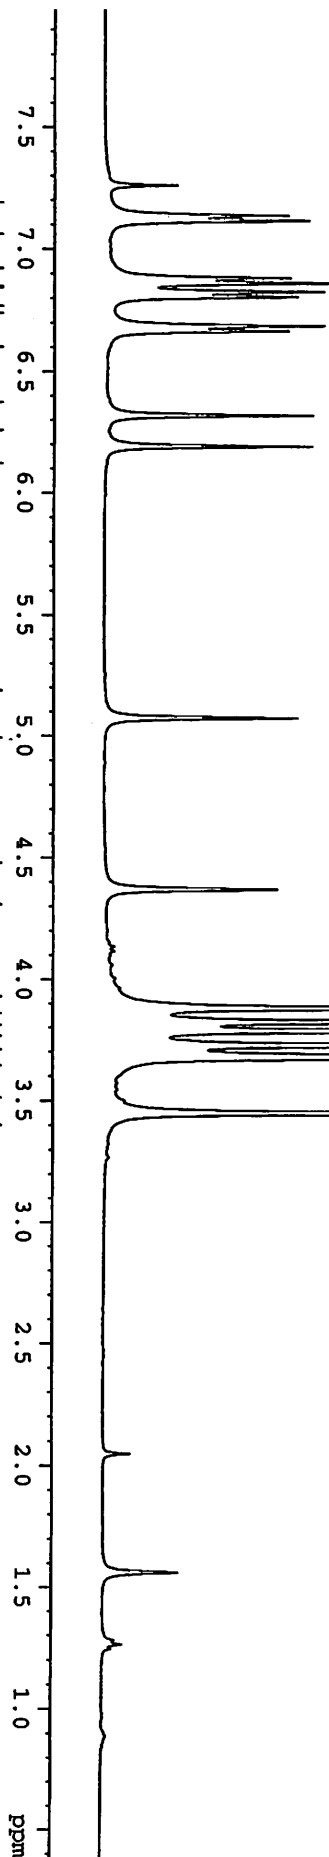

1.990  
2.034  
2.022  
2.032

1.025  
1.008

1.000

1.041

3.135  
3.076  
3.003  
3.186  
4.801  
2.988

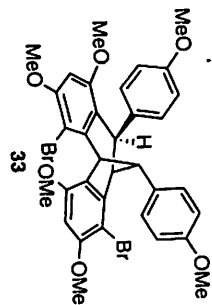

158.423  
157.792  
157.543  
155.997  
155.077  
154.619  
145.891  
144.442  
138.538  
134.392  
128.766  
128.497  
128.449

117.847  
113.484  
113.405

101.987  
99.052  
95.557  
95.293

56.680  
56.419  
56.287  
55.487  
55.448  
55.171  
55.116  
49.681  
48.836  
43.588

NAME Ango232b  
EXPNO 2  
PROCNO 1  
Date\_ 20100908  
Time 13.18  
INSTRUM spect  
PROBHD 5 mm PABBO BB-  
PULPROG zgpg30  
TD 31550  
SOLVENT DMSO  
NS 2391  
DS 4  
SWH 24038.461 Hz  
FIDRES 0.714367 Hz  
AQ 0.699700 sec  
RG 1820  
DW 20.800 usec  
DE 6.50 usec  
TE 298.2 K  
CNS12 145.0000000  
D1 1.5000000  
D12 2.0000000 sec  
D2 0.00344828 sec  
D12 0.0002000 sec  
TD0 1  
ZGPGTNS

===== CHANNEL f1 =====  
NUC1 13C  
P1 8.50 usec  
PL1 2000.00 usec  
PL2 120.00 dB  
PL0 3.20 dB  
PL1W 0.00000000 W  
PL1W 49.53329468 W  
SFO1 100.6228298 MHz  
SP2 11.07 dB  
SP1A2 Crd60comp.4  
SFOAL2 0.500  
SFOF2 0.00 Hz

===== CHANNEL f2 =====  
CPDPRG2 waltz16  
NUC2 1H  
P0 14.10 usec  
P3 9.40 usec  
P4 18.80 usec  
PCPD2 80.00 usec  
PL2 -4.00 dB  
PL12 14.60 dB  
PL2W 26.94187927 W  
PL12W 0.37190142 W  
SFO2 400.1316005 MHz  
SI 32768  
SF 100.612737 MHz  
WDW EM  
SSB 0  
LB 1.00 Hz  
GB 0  
PC 1.40

190 180 170 160 150 140 130 120 110 100 90 80 70 60 50 40 30 20 10 0 -10 ppm

7.164  
7.142  
6.854  
6.833  
6.821  
6.800  
6.675  
6.653  
6.498  
6.492  
6.270  
6.264  
6.191

4.338  
4.253  
3.830  
3.826  
3.790  
3.748  
3.705  
3.686  
3.441

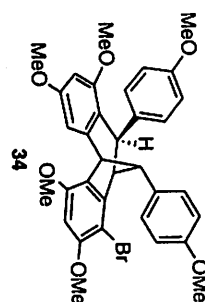

NAME mic\_IV\_basb\_02\_07  
EXPNO 1  
PROCNO 1  
Date\_ 20110207  
Time 9.31  
INSTRUM spect  
PROBHD 5 mm PABBI 1H/  
PULPROG zg30  
TD 32768  
SOLVENT CDC13  
NS 1  
DS 0  
SWH 6009.615 Hz  
FIDRES 0.183399 Hz  
AQ 2.7263477 sec  
RG 203  
DW 83.200 usec  
DE 6.50 usec  
TE 300.2 K  
D1 1.00000000 sec  
TD0 1

===== CHANNEL f1 =====  
NUC1 1H  
P1 7.25 usec  
PL1 0.00 dB  
PL1W 12.20776844 W  
SF01 399.9225995 MHz  
SI 32768  
SF 399.9200115 MHz  
WDW EM  
SSB 0  
LB 0.20 Hz  
GB 0  
PC 1.00

8.0  
7.5  
7.0  
6.5  
6.0  
5.5  
5.0  
4.5  
4.0  
3.5  
3.0  
2.5  
2.0  
1.5  
1.0  
0.5  
ppm

1.926  
2.043  
2.069  
2.077  
0.933  
0.908  
1.000  
0.911  
0.929  
3.180  
2.498  
3.126  
2.801  
1.047  
4.216  
2.660

Current Data Parameters  
NAME mic\_tv\_02\_07\_BDSB\_prod\_char\_C  
EXNO 5  
PROCNO 1

F2 - Acquisition Parameters

Date\_ 20110207  
Time 17.55  
INSTRUM 5 mm PABBO BB-  
PROBHD spect  
PULPROG zgpg  
TD 32768  
SOLVENT CDCl3  
NS 1707  
DS 0  
SWH 24038.461 Hz  
FIDRES 0.733596 Hz  
AQ 0.6815244 sec  
RG 1820  
DW 20.800 usec  
DE 6.50 usec  
TE 298.3 K  
D1 0.69999999 sec  
D11 0.03000000 sec  
TD0 1

===== CHANNEL f1 =====

NUC1 13C  
P1 8.50 usec  
PL1 3.20 dB  
PL1W 49.53329468 W  
SFO1 100.6228298 MHz

===== CHANNEL f2 =====

CPDPRG2 waltz16  
NUC2 1H  
PCPD2 80.00 usec  
PL2 -4.00 dB  
PL12 14.60 dB  
PL13 14.60 dB  
PL2W 26.94187927 W  
PL12W 0.37190142 W  
PL13W 0.37190142 W  
SFO2 400.1316005 MHz

F2 - Processing Parameters

SI 32768  
SF 100.6127539 MHz  
WDW EM  
SSB 0  
LB 1.00 Hz  
GB 0  
PC 1.40

159.736  
159.091  
157.889  
157.654  
155.981  
154.129  
145.566  
145.493  
138.823  
134.981  
129.955  
128.774  
128.620

115.679  
113.671  
113.612  
113.520

103.153

97.232  
95.796

57.172  
56.677  
55.789  
55.492  
55.374  
55.348  
55.291  
50.994  
49.218  
43.692

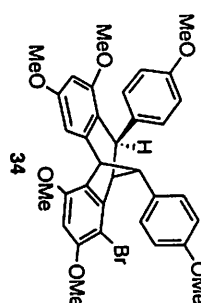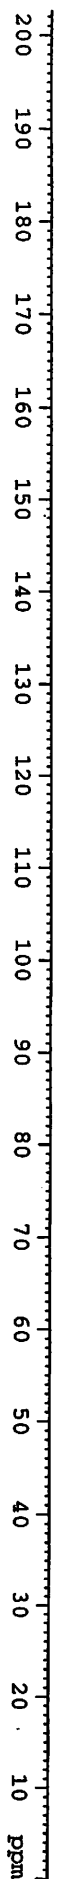

7.140  
7.119  
7.042  
6.833  
6.812  
6.760  
6.738  
6.652  
6.646  
6.640  
6.590  
6.568  
6.563  
6.559  
6.271  
5.994  
5.989

4.463  
4.283  
4.279  
3.806  
3.804  
3.775  
3.758  
3.643  
3.617  
3.501  
3.405  
2.973

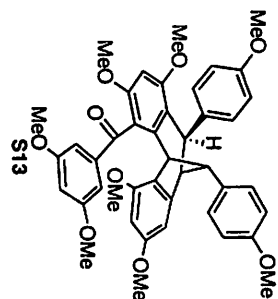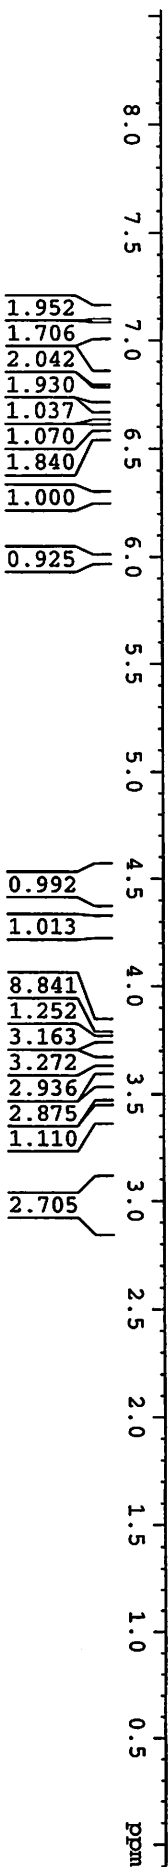

```

NAME mic_III_me_ketone
EXPNO 1
PROCNO 1
Date_ 20100908
Time 16.01
INSTRUM spect
PROBHD 5 mm BBI 1H/D-
PULPROG zg30
TD 32768
SOLVENT CDC13
NS 13
DS 0
SWH 6009.615 Hz
FIDRES 0.183399 Hz
AQ 2.7263477 sec
RG 203
DW 83.200 usec
DE 6.50 usec
TE 429.0 K
D1 1.00000000 sec
TD0 1

===== CHANNEL f1 =====
NUC1 1H
P1 7.25 usec
PL1 0.00 dB
PL1W 12.20776844 W
SFO1 399.9225995 MHz
SI 32768
SF 399.9200118 MHz
WDW EM
SSB 0
LB 0.20 Hz
GB 0
PC 1.00

```

196.492

160.944  
160.782  
160.746  
157.871  
157.828  
157.582  
155.103  
146.378  
145.423  
141.905  
139.386  
135.444  
129.202  
128.970  
128.832

118.947  
117.434  
113.725  
113.596  
107.633  
105.411  
100.808  
96.356  
94.066

56.468  
56.041  
55.918  
55.724  
55.667  
55.553  
55.427  
54.044  
49.945  
46.784  
44.694

30.035

Current Data Parameters  
NAME mlc\_III\_me\_ketone\_C\_2  
EXPNO 5  
PROCNO 1

F2 - Acquisition Parameters  
Date\_ 20100909  
Time 11.06  
INSTRUM spect  
PROBHD 5 mm PABBO BB-  
PULPROG zgpg  
TD 32768  
SOLVENT CDCl3  
NS 6323  
DS 0  
SMH 24038.461 Hz  
FIDRES 0.733596 Hz  
AQ 0.6816244 sec  
RG 1820  
DW 20.800 usec  
DE 6.50 usec  
TE 295.2 K  
D1 0.69999999 sec  
D11 0.03000000 sec  
TD0 1

===== CHANNEL f1 =====  
NUC1 13C  
P1 8.50 usec  
PL1 3.20 dB  
PL1W 49.53329468 W  
SFO1 100.6228298 MHz

===== CHANNEL f2 =====  
CPDPRG2 waltz16  
NUC2 1H  
PCPD2 80.00 usec  
PL2 -4.00 dB  
PL12 14.60 dB  
PL13 14.60 dB  
PL2W 26.94187927 W  
PL12W 0.37190142 W  
PL13W 0.37190142 W  
SFO2 400.1316005 MHz

F2 - Processing parameters  
SI 32768  
SF 100.6127366 MHz  
WDW EM  
SSB 0  
LB 1.00 Hz  
GB 0

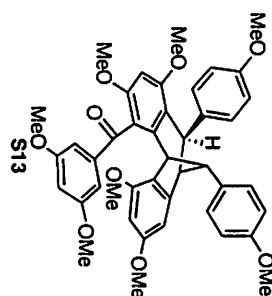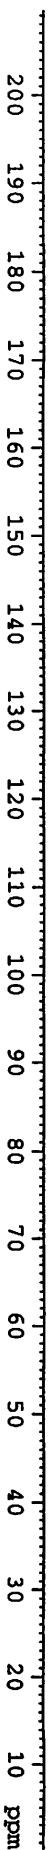

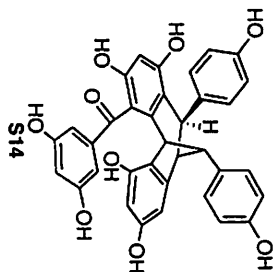

9.317  
8.654  
8.061  
7.204  
7.183  
7.012  
7.007  
6.848  
6.826  
6.711  
6.690  
6.669  
6.663  
6.658  
6.594  
6.589  
6.566  
6.545  
6.369  
6.108  
6.103  
4.317  
4.313  
4.160  
3.712  
3.405

0.758  
3.445  
2.161  
1.840  
1.861  
1.900  
1.840  
1.000  
0.946  
1.864  
0.968  
0.908  
0.954  
0.993  
1.078  
1.019

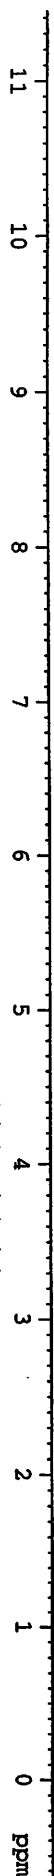

```

NAME mic_III_deprot_prep
EXPNO 1
PROCNO 1
Date_ 20101013
Time 16.39
INSTRUM spect
PROBHD 5 mm PABBI 1H/
PULPROG zg30
TD 32768
SOLVENT Acetone
NS 7
DS 0
SWH 6009.615 Hz
FIDRES 0.183399 Hz
AQ 2.7263477 sec
RG 128
DE 83.200 usec
TE 295.3 K
D1 1.0000000 sec
TD0 1

===== CHANNEL f1 =====
NUC1 1H
P1 7.25 usec
PL1 0.00 dB
PL1W 12.20776844 W
SFO1 399.9225995 MHz
SI 32768
SF 399.9199931 MHz
WDW EM
SSB 0
LB 0.20 Hz
GB 0
PC 1.00

```

200.617

159.613  
158.505  
158.408  
155.785  
155.422  
154.675  
153.231  
146.792  
145.625  
141.945  
137.280  
133.954  
128.944  
128.243  
124.866  
114.863  
114.668  
114.415  
108.329  
107.540  
103.174  
101.560  
101.080

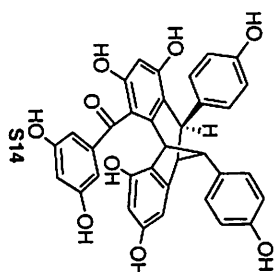

56.345  
49.215  
46.648  
46.063

Current Data Parameters  
NAME mtc\_III\_deprot\_ketone\_C  
EXPNO 5  
PROCNO 1

F2 - Acquisition Parameters  
Date\_ 20101013  
Time 21.14

INSTRUM spect  
PROBHD 5 mm PABBO BB-

PULPROG zgpg  
TD 32768

SOLVENT Acetone  
NS 1828

DS 0  
SWH 24038.461 Hz

FIDRES 0.733596 Hz  
AQ 0.6816244 sec

RG 1820  
DW 20.800 usec

DE 6.50 usec  
TE 295.3 K

D1 0.69999999 sec  
D11 0.03000000 sec

TD0 1

===== CHANNEL f1 =====  
NUC1 13C

P1 8.50 usec  
PL1 3.20 dB

PL1N 49.53329468 W  
SFO1 100.6228298 MHz

===== CHANNEL f2 =====  
CPLPRG2 waltz16

NUC2 1H  
PCPD2 80.00 usec

PL2 -4.00 dB  
PL12 14.60 dB

PL13 14.60 dB  
PL14 26.94187927 W

PL15 0.37190142 W  
PL16W 0.37190142 W

SFO2 400.1316005 MHz

F2 - Processing parameters  
SI 32768

SF 100.6127690 MHz  
WDM EM

SSB 0  
LB 1.00 Hz

GB 0  
PC 1.40

210 200 190 180 170 160 150 140 130 120 110 100 90 80 70 60 50 40 30 20 10 0 ppm

|       |  |
|-------|--|
| 7.487 |  |
| 7.483 |  |
| 7.466 |  |
| 7.414 |  |
| 7.411 |  |
| 7.394 |  |
| 7.390 |  |
| 7.375 |  |
| 7.356 |  |
| 7.353 |  |
| 7.342 |  |
| 7.331 |  |
| 7.322 |  |
| 7.315 |  |
| 7.309 |  |
| 7.298 |  |
| 7.290 |  |
| 7.285 |  |
| 7.234 |  |
| 7.215 |  |
| 7.209 |  |
| 7.198 |  |
| 7.176 |  |
| 7.170 |  |
| 7.163 |  |
| 7.159 |  |
| 7.155 |  |
| 7.144 |  |
| 7.138 |  |
| 7.134 |  |
| 7.121 |  |
| 6.996 |  |
| 6.985 |  |
| 6.961 |  |
| 6.939 |  |
| 6.862 |  |
| 6.842 |  |
| 6.775 |  |
| 6.753 |  |
| 6.728 |  |
| 6.716 |  |
| 6.710 |  |
| 6.707 |  |
| 6.679 |  |
| 6.674 |  |
| 6.662 |  |
| 6.657 |  |
| 6.651 |  |
| 6.645 |  |
| 6.639 |  |
| 6.634 |  |
| 6.323 |  |
| 6.145 |  |
| 6.140 |  |
| 5.080 |  |
| 4.955 |  |
| 4.933 |  |
| 4.908 |  |
| 4.901 |  |
| 4.895 |  |
| 4.866 |  |
| 4.825 |  |
| 4.795 |  |
| 4.779 |  |
| 4.750 |  |
| 4.683 |  |
| 4.654 |  |
| 4.399 |  |
| 4.395 |  |
| 4.389 |  |
| 4.430 |  |

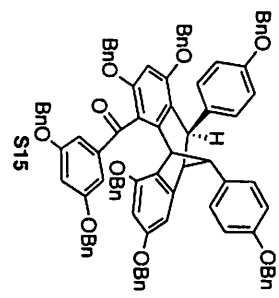

Current Data Parameters  
NAME mic\_III\_Bn\_ketone  
EXPNO 5  
PROCNO 1

F2 - Acquisition Parameters  
Date\_ 20100915  
Time 18.14  
INSTRUM spect  
PROBHD 5 mm PABBO BB-  
PULPROG zg30  
TD 32768  
SOLVENT CDC13  
NS 5  
DS 0  
SWH 6009.615 Hz  
FIDRES 0.183399 Hz  
AQ 2.7263477 sec  
RG 645  
DW 83.200 usec  
DE 6.50 usec  
TE 298.2 K  
D1 1.00000000 sec  
TD0 1

==== CHANNEL f1 =====  
NUC1 1H  
P1 9.50 usec  
PL1 -4.00 dB  
PL1W 26.94187927 W  
SFO1 400.1328009 MHz  
F2 - Processing parameters  
SI 32768  
SF 400.1300092 MHz  
WDW EM  
SSB 0  
LB 0.20 Hz  
GB 0  
PC 1.00

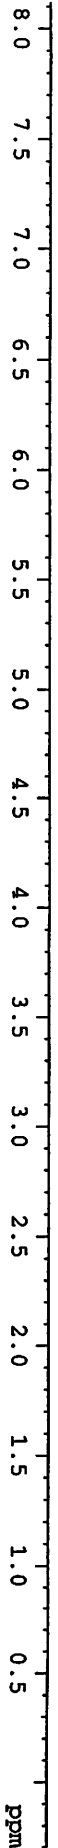

|        |
|--------|
| 0.864  |
| 1.398  |
| 38.085 |
| 0.642  |
| 1.632  |
| 10.479 |
| 0.533  |
| 4.853  |
| 2.654  |
| 2.131  |
| 1.959  |
| 2.155  |
| 1.993  |
| 1.726  |
| 1.202  |
| 1.000  |
| 0.955  |

|       |
|-------|
| 2.223 |
| 5.419 |
| 6.372 |
| 0.487 |
| 1.163 |
| 1.487 |
| 1.149 |
| 0.941 |
| 0.495 |
| 1.081 |

|       |
|-------|
| 1.014 |
|-------|

|       |
|-------|
| 0.810 |
|-------|

196.591  
159.933  
159.552  
159.357  
157.235  
157.003  
156.472  
153.598  
146.386  
145.484  
142.392  
139.647  
137.473  
137.397  
137.146  
137.076  
136.965  
136.579  
136.504  
135.502  
130.383  
129.100  
128.722  
128.656  
128.624  
128.333  
128.188  
128.107  
128.018  
127.946  
127.850  
127.799  
127.718  
127.667  
127.647  
127.523  
127.244  
127.103  
126.451  
119.663  
117.564  
114.761  
114.427  
106.662  
102.567  
99.167  
96.242  
70.501  
70.453  
70.278  
70.256  
70.043  
69.885  
68.692  
56.684  
49.968  
46.822  
44.222

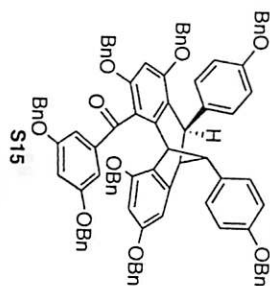

Current Data Parameters  
NAME mic\_111\_Bn\_ketone\_2\_C  
EXPNO 5  
PROCNO 1

F2 - Acquisition Parameters

Date\_ 20100922  
Time 13.23  
INSTRUM spect  
PROBHD 5 mm PABBO BB-  
PULPROG zgpg  
TD 32768  
SOLVENT CDCl3  
NS 2759  
DS 0  
SWH 24038.461 Hz  
FIDRES 0.733596 Hz  
AQ 0.6816244 sec  
RG 1820  
DW 20.800 usec  
DE 6.50 usec  
TE 298.4 K  
D1 0.69999999 sec  
D11 0.03000000 sec  
TD0 1

===== CHANNEL f1 =====  
NUC1 13C  
P1 8.50 usec  
PL1 3.20 dB  
PL1W 49.53329468 W  
SFO1 100.6228298 MHz

===== CHANNEL f2 =====  
CPDPRG2 waltz16  
NUC2 1H  
PCPD2 80.00 usec  
PL2 -4.00 dB  
PL12 14.60 dB  
PL13 14.60 dB  
PL2W 26.94187927 W  
PL12W 0.37190142 W  
PL13W 0.37190142 W  
SFO2 400.1316005 MHz

F2 - Processing parameters  
SI 32768  
SF 100.6127567 MHz  
WDW EM  
SSB 0  
LB 1.00 Hz  
GB 0  
PC 1.40

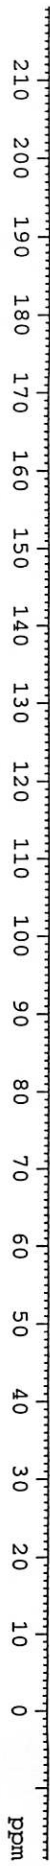

9.515  
7.449  
7.431  
7.404  
7.386  
7.372  
7.354  
7.336  
7.318  
7.314  
7.305  
7.297  
7.291  
7.279  
7.271  
7.259  
7.224  
7.205  
7.199  
7.187  
7.163  
7.144  
7.126  
7.086  
7.064  
6.901  
6.879  
6.723  
6.719  
6.697  
6.678  
6.666  
6.545  
6.540  
6.535  
6.423  
6.418  
6.398  
6.394  
5.437  
5.033  
5.006  
5.002  
4.987  
4.973  
4.958  
4.940  
4.930  
4.917  
4.910  
4.889  
4.876  
4.859  
4.848  
4.697  
4.668  
4.612  
4.583  
4.433  
4.327  
3.578  
3.416

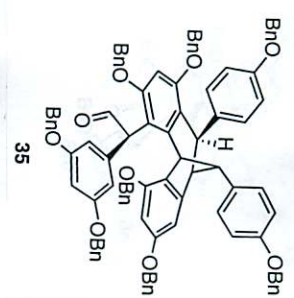

NAME mic\_IV\_ald\_1\_03\_09  
EXPNO 1  
PROCNO 1  
Date\_ 20110309  
Time 10.08  
INSTRUM spect  
PROBHD 5 mm PABBI 1H/  
PULPROG zg30  
TD 32768  
SOLVENT CDCl3  
NS 32  
DS 0  
SWH 6009.615 Hz  
FIDRES 0.183399 Hz  
AQ 2.7263477 sec  
RG 80.6  
DW 83.200 usec  
DE 6.50 usec  
TE 300.4 K  
D1 1.00000000 sec  
TD0 1

===== CHANNEL f1 =====  
NUC1 1H  
P1 7.25 usec  
PL1 0.00 dB  
PL1W 12.20776844 W  
SFO1 399.9225995 MHz  
SI 32768  
SF 399.9200101 MHz  
WDW EM  
SSB 0  
LB 0.20 Hz  
GB 0  
PC 1.00

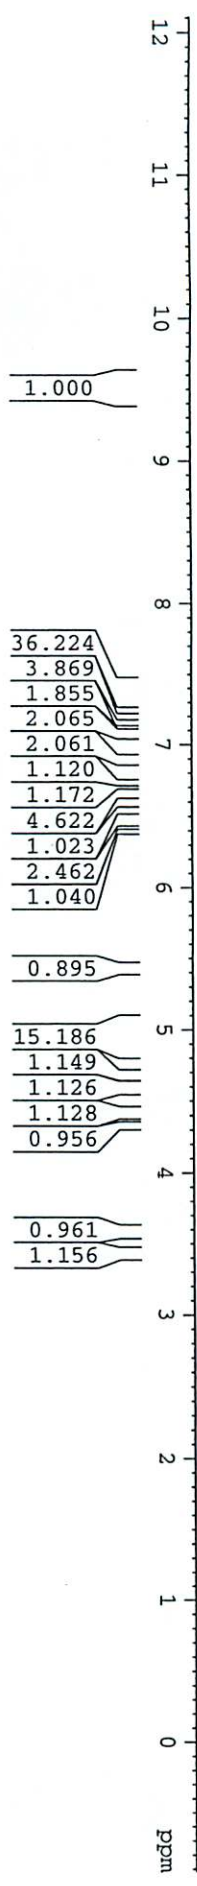

199.681  
160.104  
157.868  
157.148  
157.065  
155.309  
154.209  
146.683  
146.169  
140.900  
139.857  
137.293  
137.145  
136.774  
136.547  
135.551  
128.977  
128.878  
128.716  
128.699  
128.653  
128.551  
128.308  
128.290  
128.146  
128.108  
128.052  
128.011  
127.989  
127.837  
127.704  
127.601  
127.495  
127.178  
117.853  
115.302  
114.696  
114.425  
108.721  
102.783  
100.851  
98.894  
96.682  
70.890  
70.616  
70.387  
70.234  
70.184  
69.938  
69.765  
57.181  
55.784  
50.016  
46.795  
45.902

Current Data Parameters  
NAME mic\_III\_aldehyde-1\_C  
EXPNO 5  
PROCNO 1

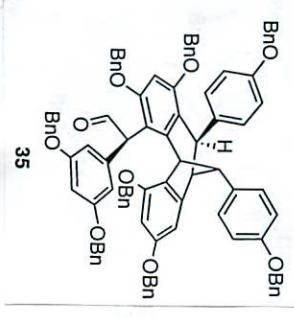

F2 - Acquisition Parameters  
Date\_ 20101013  
Time 22.03  
INSTRUM spect  
PROBHD 5 mm PABBO BB-  
PULPROG zgpg  
TD 32768  
SOLVENT CDCl3  
NS 6906  
DS 0  
SWH 24038.461 Hz  
FIDRES 0.733596 Hz  
AQ 0.6816244 sec  
RG 1820  
DW 20.800 usec  
DE 6.50 usec  
TE 295.9 K  
D1 0.69999999 sec  
D11 0.03000000 sec  
TD0 1

===== CHANNEL f1 =====  
NUC1 13C  
P1 8.50 usec  
PL1 3.20 dB  
PL1W 49.53329468 W  
SFO1 100.6228298 MHz

===== CHANNEL f2 =====  
CPDPRG2 waltz16  
NUC2 1H  
PCPD2 80.00 usec  
PL2 -4.00 dB  
PL12 14.60 dB  
PL13 14.60 dB  
PL2W 26.94187927 W  
PL12W 0.37190142 W  
PL13W 0.37190142 W  
SFO2 400.1316005 MHz

F2 - Processing parameters  
SI 32768  
SF 100.6127552 MHz  
WDW EM  
SSB 0  
LB 1.00 Hz  
GB 0  
PC 1.40

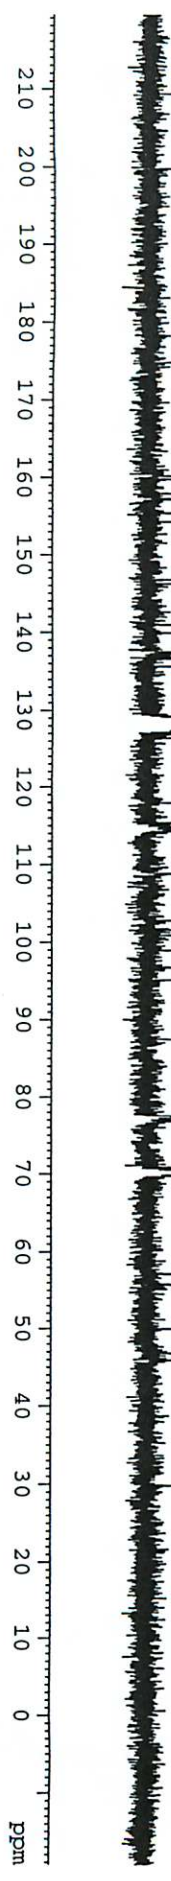

7.181  
7.157  
7.153  
7.139  
7.123  
7.093  
7.076  
7.042  
7.021  
6.868  
6.847  
6.720  
6.716  
6.701  
6.693  
6.680  
6.672  
6.637  
6.615  
6.484  
6.478  
6.469  
6.384  
6.378  
6.373  
6.278  
6.274  
5.459  
5.434  
5.133  
5.098  
5.050  
5.027  
5.000  
4.909  
4.855  
4.737  
4.722  
4.693  
4.591  
4.562  
4.377  
3.670  
3.389  
3.193

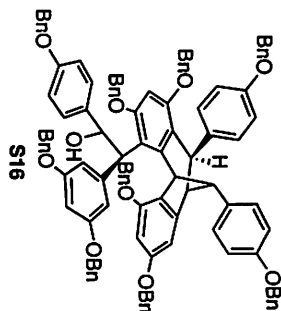

Current Data Parameters  
NAME mic\_III\_griqnard\_alcohol\_2  
EXPNO 5  
PROCNO 1

F2 - Acquisition Parameters

Date\_ 20100911  
Time 11.49  
INSTRUM spect  
PROBHD 5 mm PABBO BB-  
PULPROG zg30  
TD 32768  
SOLVENT CDCl3  
NS 13  
DS 0  
SWH 6009.615 Hz  
FIDRES 0.183399 Hz  
AQ 2.7263477 sec  
RG 287  
DW 83.200 usec  
DE 6.50 usec  
TE 298.2 K  
D1 1.00000000 sec  
TD0 1

===== CHANNEL f1 =====  
NUC1 1H  
P1 9.50 usec  
PL1 -4.00 dB  
PL1W 26.94187927 W  
SFO1 400.1328009 MHz  
F2 - Processing parameters  
SI 32768  
SF 400.130097 MHz  
WDW EM  
SSB 0  
LB 0.20 Hz  
GB 0  
PC 1.00

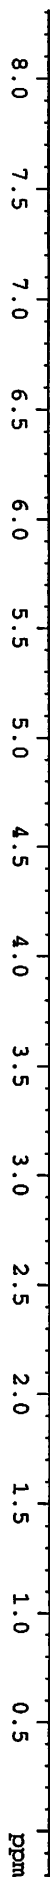

5.278  
30.167  
12.310  
2.068  
2.335  
1.203  
2.034  
2.509  
2.019  
2.887  
1.109  
1.000

1.089  
1.247  
6.099  
3.917  
2.718  
4.928  
1.358  
1.117

0.973  
1.200  
0.947

159.908  
159.501  
157.915  
157.174  
157.095  
157.079  
147.676  
145.732  
140.256  
137.485  
137.361  
137.216  
137.165  
137.088  
137.001  
136.861  
136.010  
129.798  
128.959  
128.850  
128.714  
128.684  
128.629  
128.367  
128.315  
128.273  
128.098  
127.991  
127.812  
127.753  
127.695  
127.645  
127.592  
127.579  
127.470  
127.284  
126.812  
118.346  
117.927  
114.659  
114.521  
114.484  
108.497  
103.693  
100.309  
97.166  
73.913  
71.202  
70.570  
70.208  
70.027  
69.950  
69.889  
69.770  
55.750  
51.996  
50.665  
47.160  
46.616  
29.847

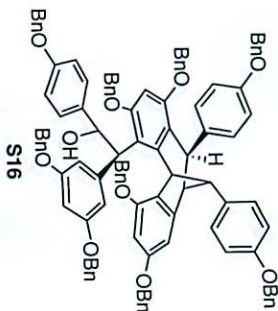

Current Data Parameters  
NAME mic\_iii\_glycard\_alcohol\_2\_c  
EXPNO 5  
PROCNO 1

F2 - Acquisition Parameters

Date\_ 20100911  
Time 11.53  
INSTRUM spect  
PROBHD 5 mm PABBO BB-  
PULPROG zgpg  
TD 32768  
SOLVENT CDCl3  
NS 7881  
DS 0  
SWH 24038.461 Hz  
FIDRES 0.733596 Hz  
AQ 0.6816244 sec  
RG 1620  
DW 20.800 usec  
DE 6.50 usec  
TE 298.2 K  
D1 0.69999999 sec  
D11 0.03000000 sec  
TD0 1

===== CHANNEL f1 =====

NUC1 13C  
P1 8.50 usec  
PL1 3.20 dB  
PL1W 49.53329468 W  
SFO1 100.6228298 MHz

===== CHANNEL f2 =====

CPDPRG2 waltz16  
NUC2 1H  
PCPD2 80.00 usec  
PL2 -4.00 dB  
PL12 14.60 dB  
PL13 14.60 dB  
PL2W 26.94187927 W  
PL12W 0.37190142 W  
PL13W 0.37190142 W  
SFO2 400.1316005 MHz

F2 - Processing Parameters

SI 32768  
SF 100.6127554 MHz  
WDW EM  
SSB 0  
LB 1.00 Hz  
GB 0  
PC 1.40

210 200 190 180 170 160 150 140 130 120 110 100 90 80 70 60 50 40 30 20 10 0 ppm

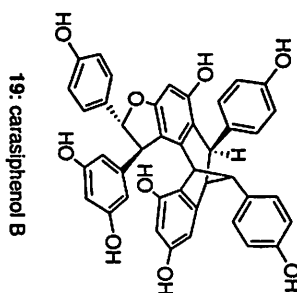

- 8.429
- 8.216
- 8.117
- 8.058
- 7.937
- 7.882
- 7.573
- 7.256
- 7.234
- 7.171
- 7.150
- 6.855
- 6.834
- 6.797
- 6.776
- 6.621
- 6.614
- 6.609
- 6.600
- 6.498
- 6.477
- 6.428
- 6.422
- 6.356
- 6.351
- 6.346
- 6.191
- 6.141
- 6.136
- 5.444
- 5.429
- 4.976
- 4.960
- 4.262
- 4.258
- 4.063
- 3.561
- 3.436

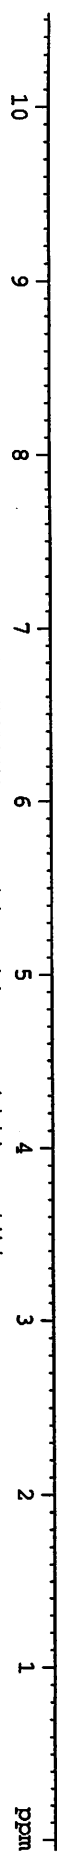

- 0.564
- 1.135
- 0.581
- 0.590
- 0.598
- 0.565
- 0.679
- 1.705
- 1.758
- 1.707
- 1.751
- 2.543
- 1.730
- 1.623
- 0.916
- 0.845
- 0.868
- 0.951
- 0.971
- 1.000
- 0.978
- 0.967
- 0.992

```

NAME      mlc_III_carasiphenol
EXPNO     1
PROCNO    1
Date_     20101105
Time      17.25
INSTRUM    spect
PROBHD     5 mm PABBI 1H/
PULPROG    zg30
TD         32768
SOLVENT    Acetone
NS         32
DS         0
SWH         6009.615 Hz
FIDRES     0.183399 Hz
AQ         2.7263477 sec
RG         203
DW         83.200 usec
DE         6.50 usec
TE         298.2 K
D1         1.0000000 sec
TD0        1

===== CHANNEL f1 =====
NUC1       1H
P1         7.25 usec
PL         0.00 dB
F1LW       12.20776844 W
SFO1       399.9225995 MHz
SI         32768
SE         399.9199931 MHz
WDW         EM
SSB         0
LB         0.20 Hz
GB         0
PC         1.00
  
```

159.899  
159.848  
158.636  
158.238  
157.852  
156.247  
156.087  
153.483  
153.396  
148.472  
144.137  
138.773  
135.199  
134.348  
130.042  
129.338  
128.642  
127.088  
117.843  
116.126  
115.718  
115.412  
114.794  
107.441  
103.925  
101.971  
101.810  
95.866  
94.363

56.770  
56.442  
49.641  
47.787  
46.703

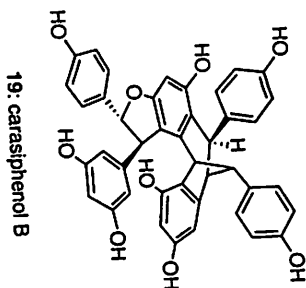

Current Data Parameters  
NAME mic\_III\_cara\_b\_C  
EXPNO 5  
PROCNO 9993

F2 - Acquisition Parameters  
Date\_ 20101112  
Time 9.31  
INSTRUM spect  
PROBHD 5 mm PABBO BB-  
PULPROG zgpg  
TD 32768  
SOLVENT Acetone  
NS 26756  
DS 0  
SWE 24038.461 Hz  
FIRRES 0.733596 Hz  
AQ 0.6816244 sec  
RG 1820  
DM 20.800 usec  
DE 6.50 usec  
TE 296.3 K  
D1 0.69999999 sec  
D11 0.03000000 sec  
TD 1

==== CHANNEL f1 =====  
NUC1 13C  
P1 8.50 usec  
PL1 3.20 dB  
PL1W 49.53329468 W  
SFO1 100.6228298 MHz

==== CHANNEL f2 =====  
CPLPRG2 waltz16  
NUC2 1H  
PCPD2 80.00 usec  
PL2 -4.00 dB  
PL2 14.60 dB  
PL3 14.60 dB  
PL3W 26.94187927 W  
PL2W 0.37190142 W  
PL3W 0.37190142 W  
SFO2 400.1316005 MHz

F2 - Processing Parameters  
SI 32768  
SF 100.6127690 MHz  
WDW EM  
SS 0  
LB 1.00 Hz  
GB 0  
PC 1.40

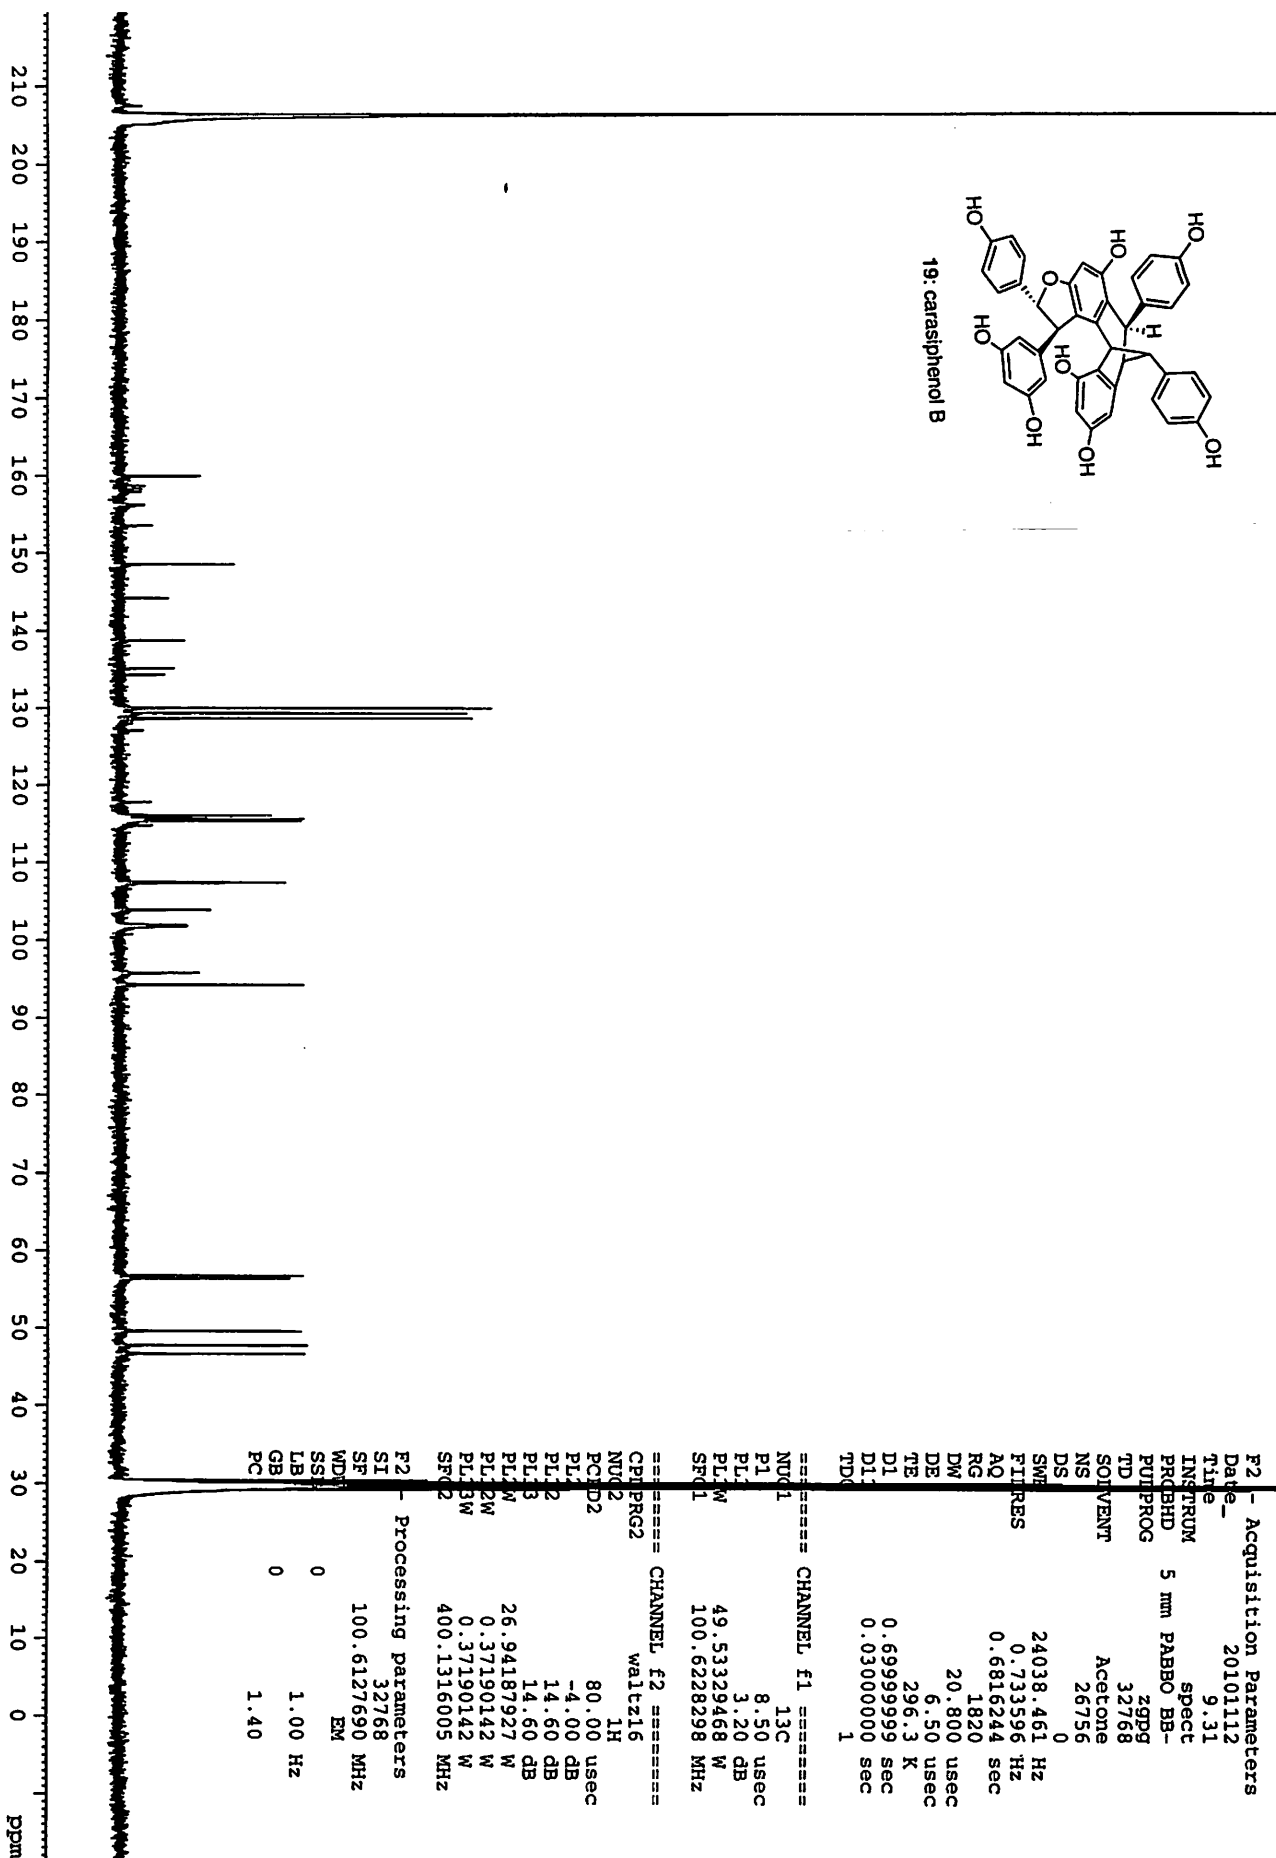

6.963  
6.941  
6.894  
6.889  
6.858  
6.837  
6.721  
6.699  
6.646  
6.634  
6.628  
6.624  
6.526  
6.520  
6.264  
6.258  
6.190

4.352  
4.211  
3.844  
3.814  
3.740  
3.683  
3.675  
3.671  
3.601  
3.434  
3.420

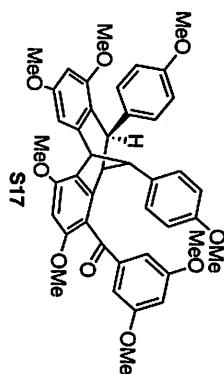

NAME mic\_ampg\_me\_ketone  
EXPNO 5  
PROCNO 1  
Date\_ 20110214  
Time 18.38  
INSTRUM spect  
PROBHD 5 mm PABBO BB-  
PULPROG zg30  
TD 32768  
SOLVENT CDCl3  
NS 32  
DS 0  
SWH 6009.615 Hz  
FIDRES 0.183399 Hz  
AQ 2.7263477 sec  
RG 362  
DW 83.200 usec  
DE 6.50 usec  
TE 298.3 K  
D1 1.00000000 sec  
TD0 1

===== CHANNEL f1 =====  
NUC1 1H  
P1 9.50 usec  
PL1 -4.00 dB  
PL1W 26.94187927 W  
SFO1 400.1328009 MHz  
SI 32768  
SF 400.1300090 MHz  
WDW EM  
SSB 0  
LB 0.20 Hz  
GB 0  
PC 1.00

8.0 7.5 7.0 6.5 6.0 5.5 5.0 4.5 4.0 3.5 3.0 2.5 2.0 1.5 1.0 0.5 ppm

1.794  
1.800  
1.969  
1.923  
2.760  
1.053  
0.948  
0.922  
0.878  
0.908  
3.130  
2.934  
9.018  
2.724  
1.931  
2.942  
0.976  
2.720

196.486

160.796  
159.755  
158.996  
158.528  
157.766  
157.447  
156.287  
145.369  
145.331  
141.462  
139.066  
135.036  
129.946  
128.824  
128.610

118.849  
116.074  
113.467  
113.320  
106.953  
105.725  
103.085  
97.054  
94.279

56.181  
55.622  
55.547  
55.467  
55.290  
55.267  
55.213  
54.845  
49.653  
49.436  
49.100

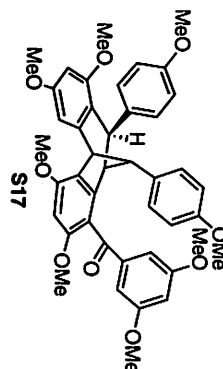

Current Data Parameters  
NAME mic\_IV\_10\_2\_2\_C  
EXPNO 5  
PROCNO 1

F2 - Acquisition Parameters

Date\_ 20101119  
Time 20.47  
INSTRUM spect  
PROBHD 5 mm PABBO BB-  
PULPROG zgpg30  
TD 32768  
SOLVENT CDCl3  
NS 256  
DS 0  
SWH 24038.461 Hz  
FIDRES 0.733596 Hz  
AQ 0.6816244 sec  
RG 2050  
DM 20.800 usec  
DE 6.50 usec  
TE 298.3 K  
D1 0.69999999 sec  
D11 0.03000000 sec  
TD0 1

===== CHANNEL f1 =====  
NUC1 13C  
P1 8.50 usec  
PL1 3.20 dB  
PL1W 49.53329468 W  
SFO1 100.6228298 MHz

===== CHANNEL f2 =====  
CPDPRG2 waltz16  
NUC2 1H  
PCPD2 80.00 usec  
PL2 -4.00 dB  
PL12 14.60 dB  
PL13 14.60 dB  
PL2W 26.94187927 W  
PL12W 0.37190142 W  
PL13W 0.37190142 W  
SFO2 400.1316005 MHz

F2 - Processing parameters  
SI 32768  
SF 100.6127556 MHz  
WDW EM  
SSB 0  
LB 1.00 Hz  
GB 0  
PC 1.40

200 190 180 170 160 150 140 130 120 110 100 90 80 70 60 50 40 30 20 10 ppm

10.009

8.515  
8.026  
7.997  
7.965  
7.761  
7.749  
7.490  
7.470  
7.425  
6.899  
6.879  
6.859  
6.748  
6.743  
6.702  
6.680  
6.671  
6.649  
6.634  
6.629  
6.624  
6.510  
6.504  
6.243  
6.220  
6.214

4.256  
4.210

3.637  
3.607

Current Data Parameters  
NAME mic\_ampG\_oh\_ketone  
EXPNO 5  
PROCNO 1

F2 - Acquisition Parameters  
Date\_ 20110214  
Time 18.30  
INSTRUM spect  
PROBHD 5 mm PABBO BB-  
PULPROG zg30  
TD 32768  
SOLVENT Acetone  
NS 32  
DS 0  
SWH 6009.615 Hz  
FIDRES 0.183399 Hz  
AQ 2.7263477 sec  
RG 362  
DW 83.200 usec  
DE 6.50 usec  
TE 298.2 K  
D1 1.0000000 sec  
TD0 1

===== CHANNEL f1 =====  
NUC1 1H  
P1 9.50 usec  
PL1 -4.00 dB  
PL1W 26.94187927 W  
SFO1 400.1328009 MHz

F2 - Processing parameters  
SI 32768  
SF 400.1299905 MHz  
WDW EM  
SSB 0  
LB 0.20 Hz  
GB 0  
PC 1.00

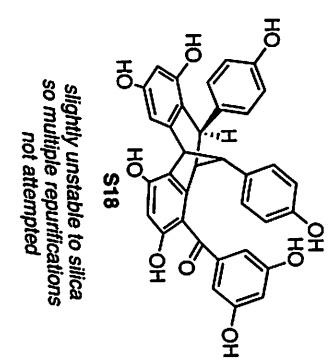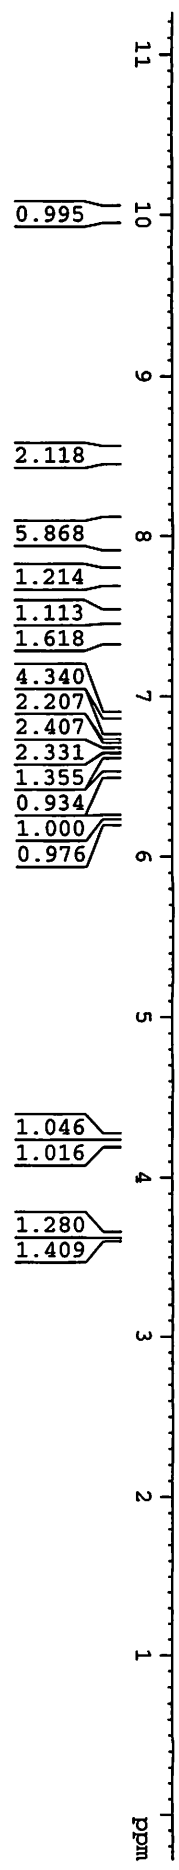

198.192

160.307  
158.531  
156.823  
156.178  
155.203  
155.079  
146.759  
145.578  
142.537  
137.100  
133.430  
128.829  
128.265  
128.203  
114.791  
114.722  
114.507  
114.412  
112.226  
107.209  
105.969  
104.898  
101.635  
101.144

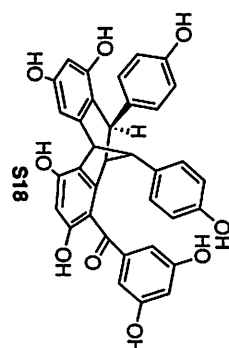

55.681  
48.750  
48.254  
44.659

Current Data Parameters  
NAME mic\_IV\_12\_2\_C  
EXPNO 5  
PROCNO 1

F2 - Acquisition Parameters

Date\_ 20101211  
Time 13.30  
INSTRUM spect  
PROBHD 5 mm PABBO BB-  
PULPROG zgpg  
TD 32768  
SOLVENT Acetone  
NS 1392  
DS 0  
SMH 24038.461 Hz  
FIDRES 0.733596 Hz  
AQ 0.6816244 sec  
RG 1820  
DM 20.800 usec  
DE 6.50 usec  
TE 298.5 K  
D1 0.69999999 sec  
D11 0.03000000 sec  
TD0 1

===== CHANNEL f1 =====  
NUC1 13C  
P1 8.50 usec  
PL1 3.20 dB  
PL1W 49.53329468 W  
SFO1 100.6228298 MHz

===== CHANNEL f2 =====  
CPDPRG2 waltz16  
NUC2 1H  
PCPD2 80.00 usec  
PL2 -4.00 dB  
PL12 14.60 dB  
PL13 14.60 dB  
PL2W 26.94187927 W  
PL12W 0.37190142 W  
PL13W 0.37190142 W  
SFO2 400.1316005 MHz

F2 - Processing parameters  
SI 32768  
SF 100.6127807 MHz  
WDW EM  
SSB 0  
LB 1.00 Hz  
GB 0  
PC 1.40

7.356  
7.351  
7.336  
7.332  
7.321  
7.318  
7.313  
7.310  
7.304  
7.292  
7.286  
7.160  
7.141  
7.129  
7.125  
7.121  
7.108  
7.093  
7.074  
7.057  
6.972  
6.961  
6.955  
6.950  
6.860  
6.838  
6.828  
6.823  
6.756  
6.734  
6.732  
6.726  
6.664  
6.646  
6.634  
6.628  
6.431  
6.426  
6.216  
5.046  
5.016  
4.979  
4.935  
4.908  
4.857  
4.724  
4.694  
4.666  
4.640  
4.631  
4.601  
4.542  
4.298  
3.809  
3.651

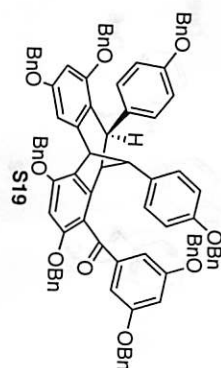

Current Data Parameters  
NAME mic\_ampg\_bonketone  
EXPNO 5  
PROCNO 1

F2 - Acquisition Parameters

Date\_ 20110208  
Time 0.48  
INSTRUM spect  
PROBHD 5 mm PABBO BB-  
PULPROG zg30  
TD 32768  
SOLVENT CDCl3  
NS 12  
DS 0  
SWH 6009.615 Hz  
FIDRES 0.183399 Hz  
AQ 2.7263477 sec  
RG 362  
DW 83.200 usec  
DE 6.50 usec  
TE 298.1 K  
D1 1.00000000 sec  
TD0 1

===== CHANNEL f1 =====

NUC1 1H  
P1 9.50 usec  
PL1 -4.00 dB  
PL1W 26.94187927 W  
SFO1 400.1328009 MHz

F2 - Processing parameters

SI 32768  
SF 400.1300090 MHz  
WDW EM  
SSB 0  
LB 0.20 Hz  
GB 0  
PC 1.00

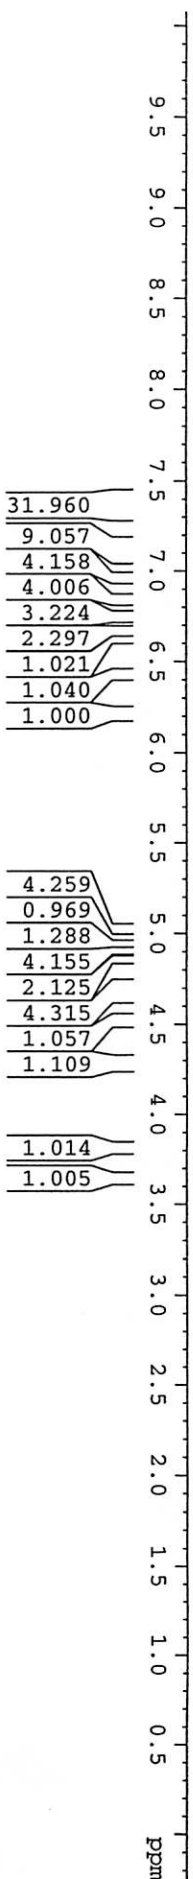

196.632  
160.083  
158.700  
158.326  
157.852  
157.132  
155.562  
146.366  
145.479  
142.405  
139.573  
137.592  
137.289  
136.985  
136.934  
136.860  
136.596  
135.302  
130.366  
129.247  
128.824  
128.730  
128.673  
128.625  
128.345  
128.236  
128.148  
128.106  
127.955  
127.934  
127.819  
127.674  
127.644  
127.542  
127.348  
126.915  
126.873  
119.248  
119.186  
116.622  
114.574  
114.491  
107.761  
106.972  
103.733  
99.107  
96.726  
70.709  
70.339  
70.255  
70.169  
69.985  
69.953  
69.515  
54.491  
50.100  
49.693  
45.570

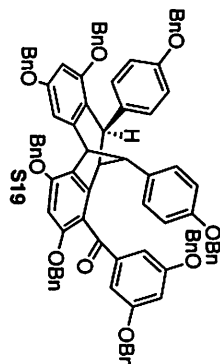

Current Data Parameters  
NAME mic\_ampc\_bmketone\_C  
EXPNO 5  
PROCNO 1

F2 - Acquisition Parameters

Date\_ 20110208  
Time 0.57  
INSTRUM spect  
PROBHD 5 mm PABBO BB-  
PULPROG zgpg  
TD 32768  
SOLVENT CDCl3  
NS 22455  
DS 0  
SWH 24038.461 Hz  
FIDRES 0.733596 Hz  
AQ 0.6816244 sec  
RG 1820  
DW 20.800 usec  
DE 6.50 usec  
TE 298.2 K  
D1 0.69999999 sec  
D11 0.03000000 sec  
TD0 1

===== CHANNEL f1 =====

NUC1 13C  
P1 8.50 usec  
PL1 3.20 dB  
PL1W 49.53329468 W  
SFO1 100.6228298 MHz

===== CHANNEL f2 =====

CPDPRG2 waltz16  
NUC2 1H  
PCPD2 80.00 usec  
PL2 -4.00 dB  
PL12 14.60 dB  
PL13 14.60 dB  
PL2W 26.94187927 W  
PL12W 0.37190142 W  
PL13W 0.37190142 W  
SFO2 400.1316005 MHz

F2 - Processing parameters

SI 32768  
SF 100.6127538 MHz  
WDW EM  
SSB 0  
LB 1.00 Hz  
GB 0  
PC 1.40

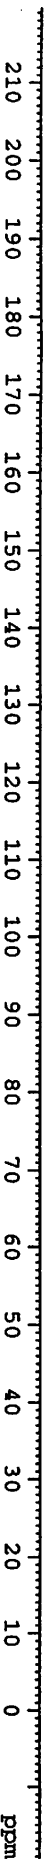

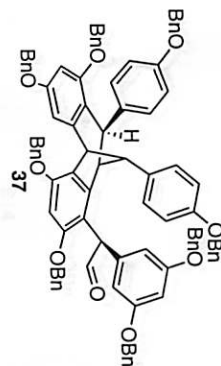

9.935  
7.433  
7.410  
7.403  
7.396  
7.374  
7.357  
7.330  
7.312  
7.295  
7.282  
7.276  
7.243  
7.176  
7.158  
7.136  
7.117  
7.099  
6.920  
6.899  
6.690  
6.672  
6.661  
6.639  
6.610  
6.605  
6.574  
6.553  
6.500  
6.495  
6.480  
6.475  
6.430  
6.424  
6.315  
5.028  
4.997  
4.984  
4.969  
4.954  
4.936  
4.922  
4.908  
4.893  
4.873  
4.857  
4.844  
4.828  
4.818  
4.788  
4.774  
4.746  
4.717  
4.676  
4.647  
4.336  
4.251  
3.800  
3.563

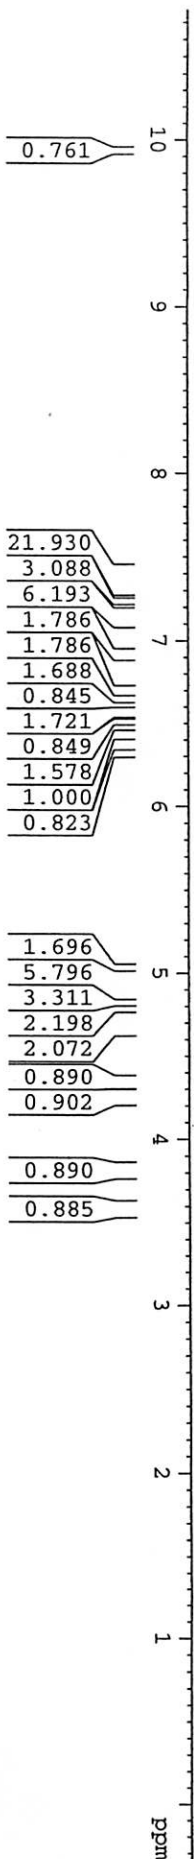

NAME mic\_IV\_aldehyde2  
EXPNO 1  
PROCNO 1  
Date\_ 20110211  
Time 10.28  
INSTRUM spect  
PROBHD 5 mm PABBI 1H/  
PULPROG zg30  
TD 32768  
SOLVENT CDCl3  
NS 12  
DS 0  
SWH 6009.615 Hz  
FIDRES 0.183399 Hz  
AQ 2.7263477 se  
RG 203  
DW 83.200 us  
DE 6.50 us  
TE 300.3 K  
D1 1.00000000 se  
TD0 1  
===== CHANNEL f1 =====  
NUC1 1H  
P1 7.25 us  
PL1 0.00 dB  
PL1W 12.20776844 W  
SF01 399.9225995 MH  
SI 32768  
SF 399.9200113 MH  
WDW EM  
SSB 0  
LB 0.20 Hz  
GB 0  
PC 1.00

200 190 180 170 160 150 140 130 120 110 100 90 80 70 60 50 40 30 20 ppm

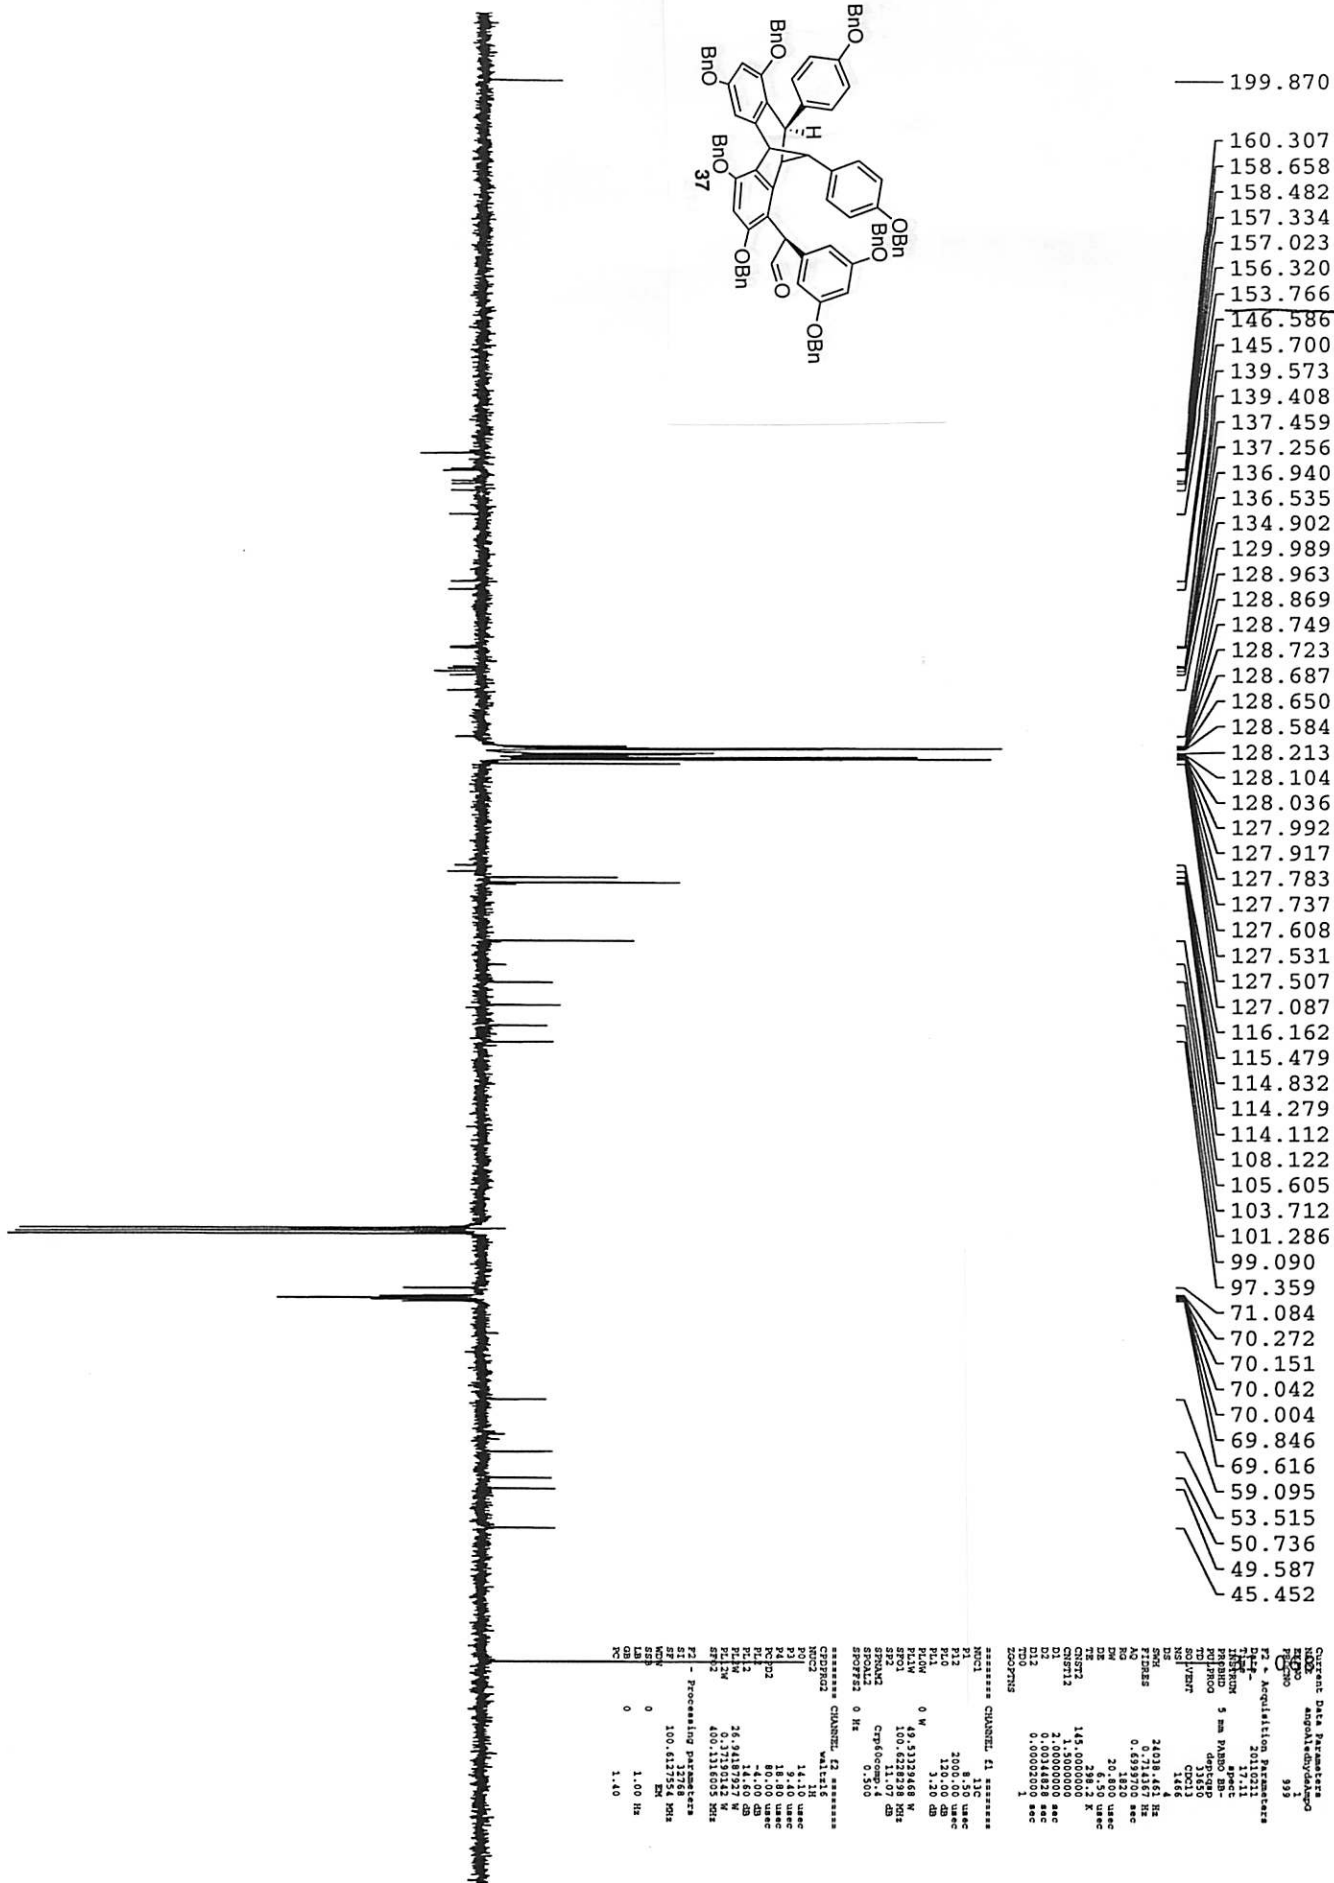

9.873  
7.449  
7.431  
7.406  
7.397  
7.391  
7.382  
7.375  
7.364  
7.354  
7.347  
7.335  
7.329  
7.311  
7.295  
7.279  
7.243  
7.236  
7.231  
7.222  
7.134  
7.116  
7.098  
7.090  
7.076  
7.057  
7.040  
6.924  
6.902  
6.890  
6.868  
6.806  
6.784  
6.768  
6.746  
6.633  
6.628  
6.580  
6.562  
6.392  
6.388  
6.354  
6.348  
6.289  
6.282  
6.277  
5.036  
5.007  
4.995  
4.974  
4.955  
4.947  
4.928  
4.899  
4.807  
4.778  
4.755  
4.726  
4.681  
4.664  
4.652  
4.635  
4.574  
4.545  
4.516  
4.486  
4.310  
3.904  
3.818  
3.575

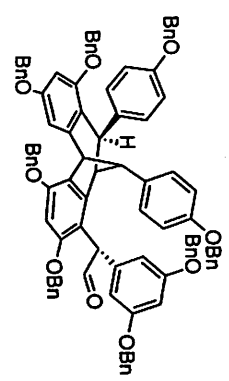

NAME mic\_IV\_aldehyde1  
EXPNO 1  
PROCNO 1  
Date\_ 20110211  
Time 10.25  
INSTRUM spect  
PROBHD 5 mm PABBI 1H/  
PULPROG zg30  
TD 32768  
SOLVENT CDCl3  
NS 17  
DS 0  
SWH 6009.615 Hz  
FIDRES 0.183399 Hz  
AQ 2.7263477 sec  
RG 203  
DW 83.200 usec  
DE 6.50 usec  
TE 300.3 K  
D1 1.0000000 sec  
TD0 1  
===== CHANNEL f1 =====  
NUC1 1H  
P1 7.25 usec  
PL1 0.00 dB  
PL1W 12.20776844 W  
SFO1 399.9225995 MHz  
SI 32768  
SF 399.9200112 MHz  
WDW EM  
SSB 0  
LB 0.20 Hz  
GB 0  
PC 1.00

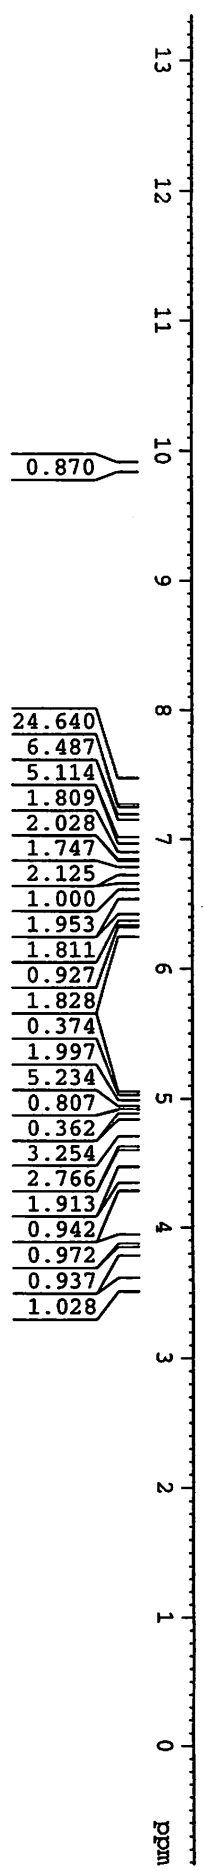



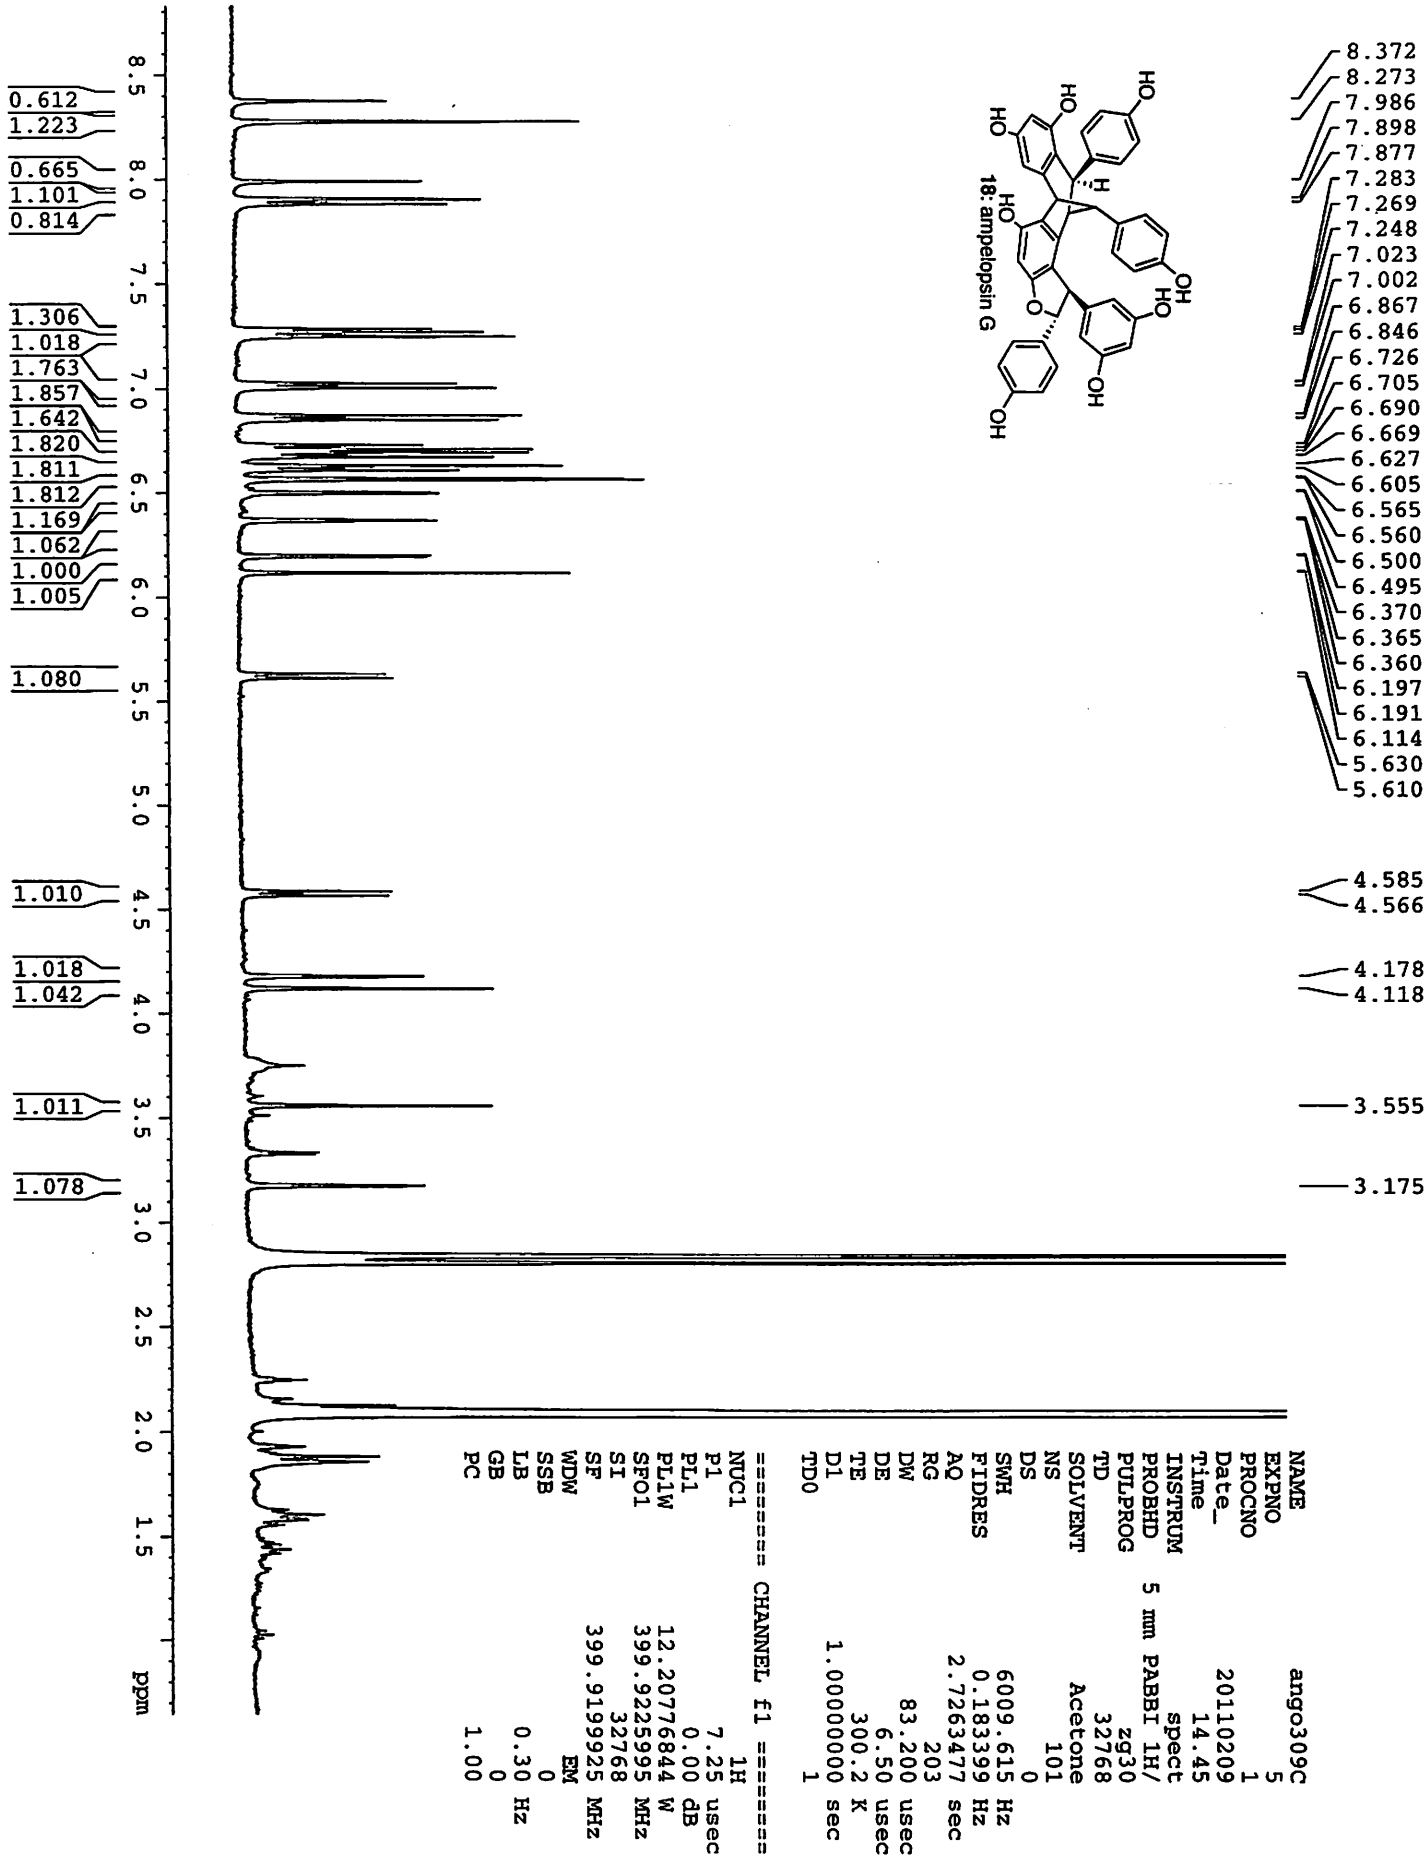

161.212  
160.005  
159.903  
158.225  
157.912  
157.326  
156.134  
156.033  
153.352  
147.792  
145.979  
142.539  
138.100  
134.561  
133.496  
130.004  
129.583  
128.934  
128.179  
118.808  
116.156  
116.066  
115.682  
115.581  
115.486  
113.285  
108.136  
108.041  
105.799  
102.432  
101.974  
96.261  
94.227

57.730  
51.963  
51.510  
50.472  
44.989

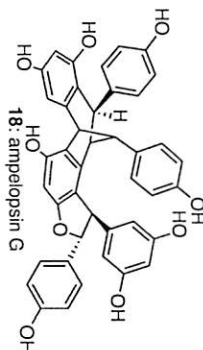

Current Data Parameters  
NAME Ampelopsin\_G1  
EXPNO 11  
PROCNO 1

F2 - Acquisition Parameters:  
Date\_ 20110216  
Time 10.31

INSTRUM spect  
PROBHD 5 mm CPDCH 13C  
PULPROG zgpg30  
TD 134144  
SOLVENT Acetone  
NS 12288  
DS 2  
SWH 52631.578 Hz  
FIDRES 0.392351 Hz  
AQ 1.2744180 se  
RG 287  
DW 9.500 us  
DE 24.96 us  
TE 297.2 K  
D1 2.00000000 se  
D11 0.03000000 se  
TD0 1

===== CHANNEL f1 =====  
NUC1 13C  
P1 9.12 us  
PL1 2.60 dB  
PL1W 36.58018494 W  
SFO1 150.9224264 MHz

===== CHANNEL f2 =====  
CPDPRG2 waltz16  
NUC2 1H  
PCPD2 70.00 us  
PL2 -0.70 dB  
PL12 15.82 dB  
PL13 120.00 dB  
PL2W 19.18285942 W  
PL12W 0.42733698 W  
PL13W 0 W  
SFO2 600.1324005 MHz

F2 - Processing Parameters  
SI 65536  
SF 150.9026634 MHz  
WDW EM  
SSB 0  
LB 1.00 Hz  
GB 0  
PC 1.40

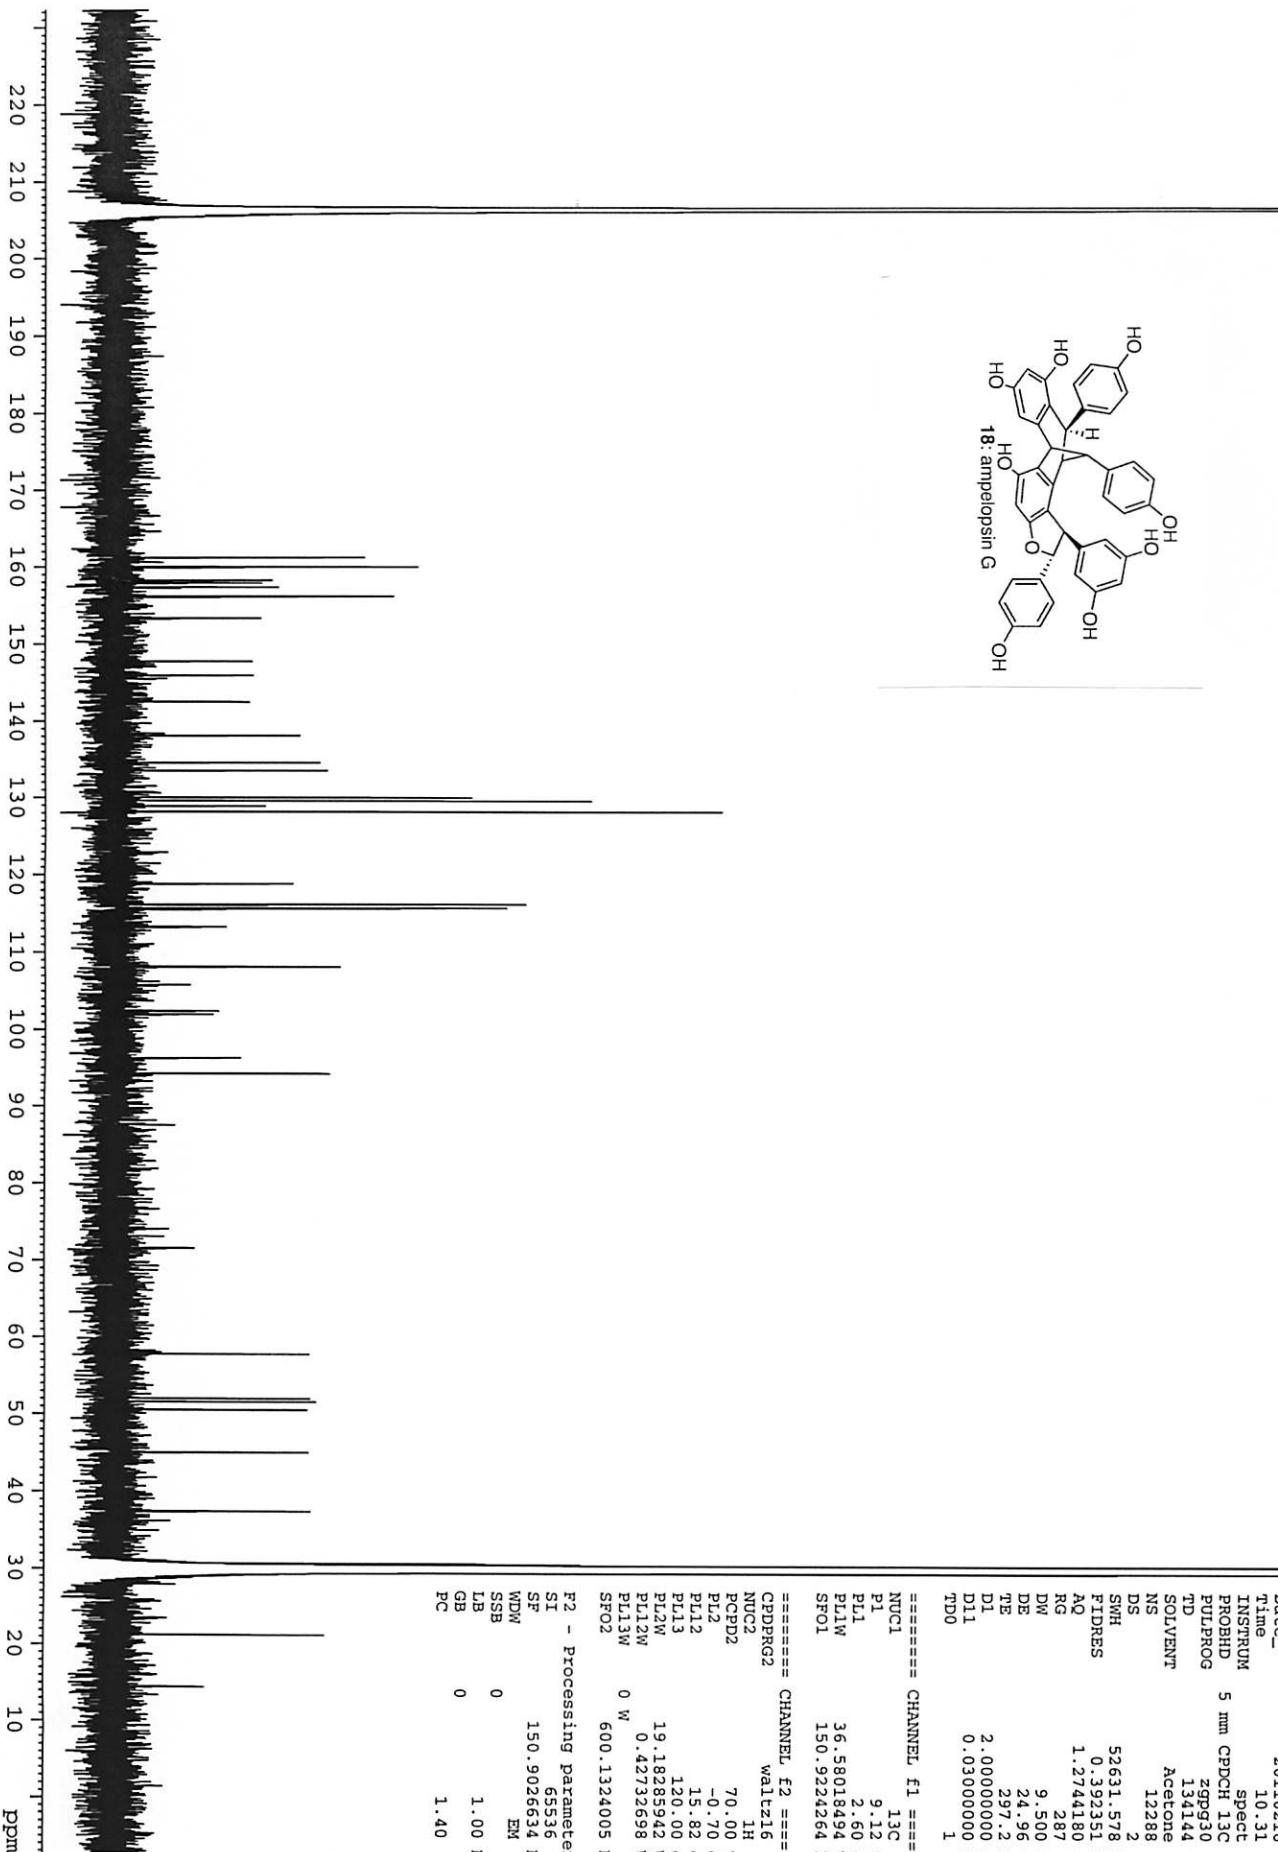

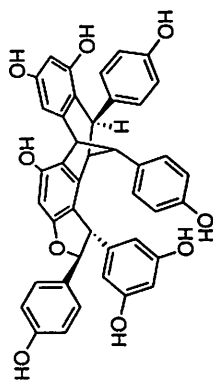

- 8.409
- 8.244
- 8.018
- 7.989
- 7.965
- 7.907
- 7.182
- 7.160
- 6.853
- 6.831
- 6.795
- 6.774
- 6.661
- 6.623
- 6.602
- 6.493
- 6.487
- 6.455
- 6.450
- 6.367
- 6.362
- 6.163
- 6.155
- 5.500
- 5.484
- 4.452
- 4.435
- 4.141
- 3.763
- 3.635
- 3.237

- 0.718
- 1.374
- 0.755
- 0.700
- 0.765
- 0.836
- 1.860
- 1.912
- 2.578
- 3.381
- 2.146
- 1.000
- 1.756
- 0.946
- 1.743
- 0.982
- 1.249
- 1.349
- 1.293
- 1.414
- 1.364

9.5 9.0 8.5 8.0 7.5 7.0 6.5 6.0 5.5 5.0 4.5 4.0 3.5 3.0 2.5 2.0 1.5 ppm

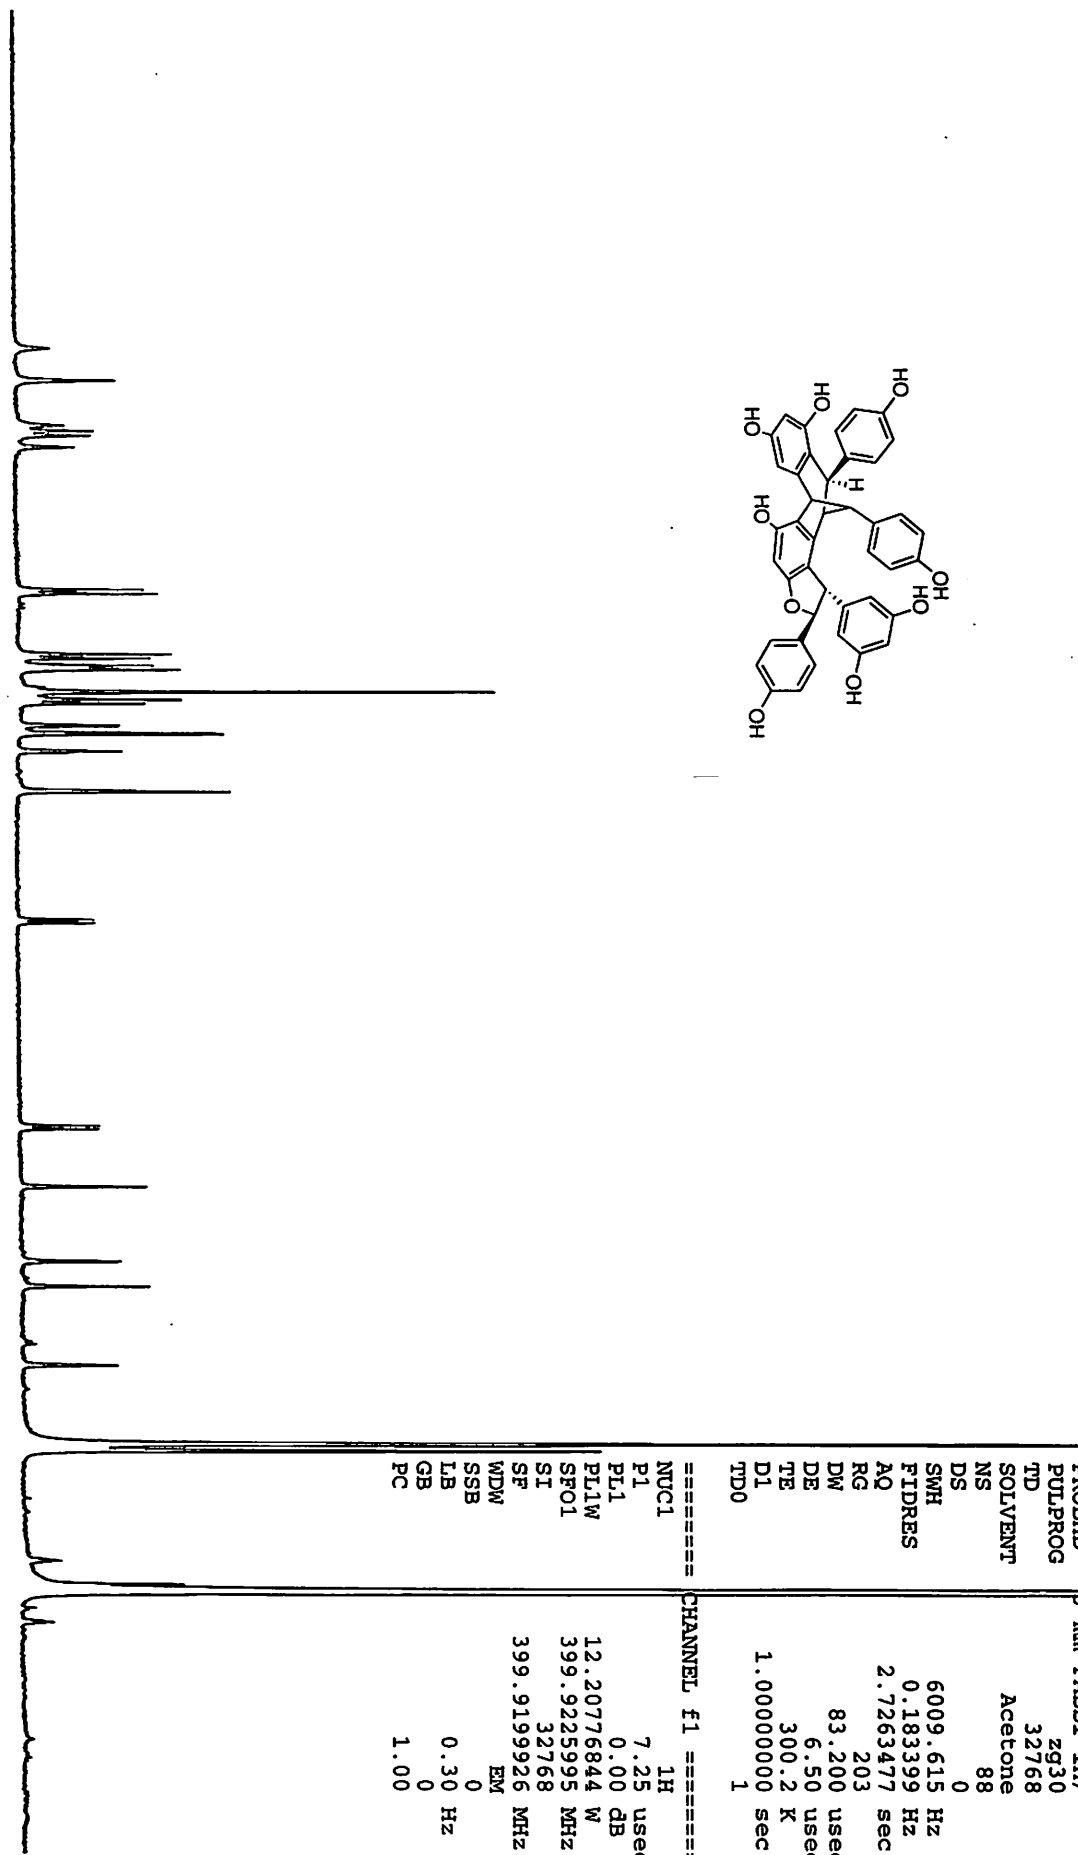

NAME: ang0309C  
 EXPNO: 3  
 PROCNO: 1  
 Date\_: 20110208  
 Time: 14.54  
 INSTRUM: spect  
 PROBHD: 5 mm PABBI 1H/  
 PULPROG: zg30  
 TD: 32768  
 SOLVENT: Acetone  
 NS: 88  
 DS: 0  
 SWH: 6009.615 Hz  
 FIDRES: 0.183399 Hz  
 AQ: 2.7263477 sec  
 RG: 203  
 DW: 83.200 usec  
 DE: 6.50 usec  
 TE: 300.2 K  
 D1: 1.0000000 sec  
 TD0: 1

===== CHANNEL f1 =====  
 NUC1: 1H  
 P1: 7.25 usec  
 PL1: 0.00 dB  
 PL1W: 12.20776844 W  
 SFO1: 399.9225995 MHz  
 SI: 32768  
 SF: 399.9199926 MHz  
 WDW: EM  
 SSB: 0  
 LB: 0.30 Hz  
 GB: 0  
 PC: 1.00

- 161.347
- 160.130
- 160.029
- 158.249
- 157.836
- 157.155
- 156.354
- 156.064
- 153.200
- 146.940
- 146.876
- 142.415
- 138.347
- 135.310
- 133.739
- 130.083
- 129.418
- 129.310
- 128.067
- 119.150
- 116.136
- 116.048
- 115.647
- 115.556
- 115.465
- 113.702
- 107.930
- 105.567
- 102.537
- 102.454
- 101.873
- 96.167
- 94.252
- 57.585
- 55.694
- 51.141
- 50.155
- 44.246

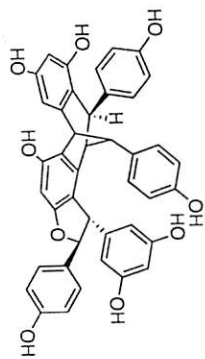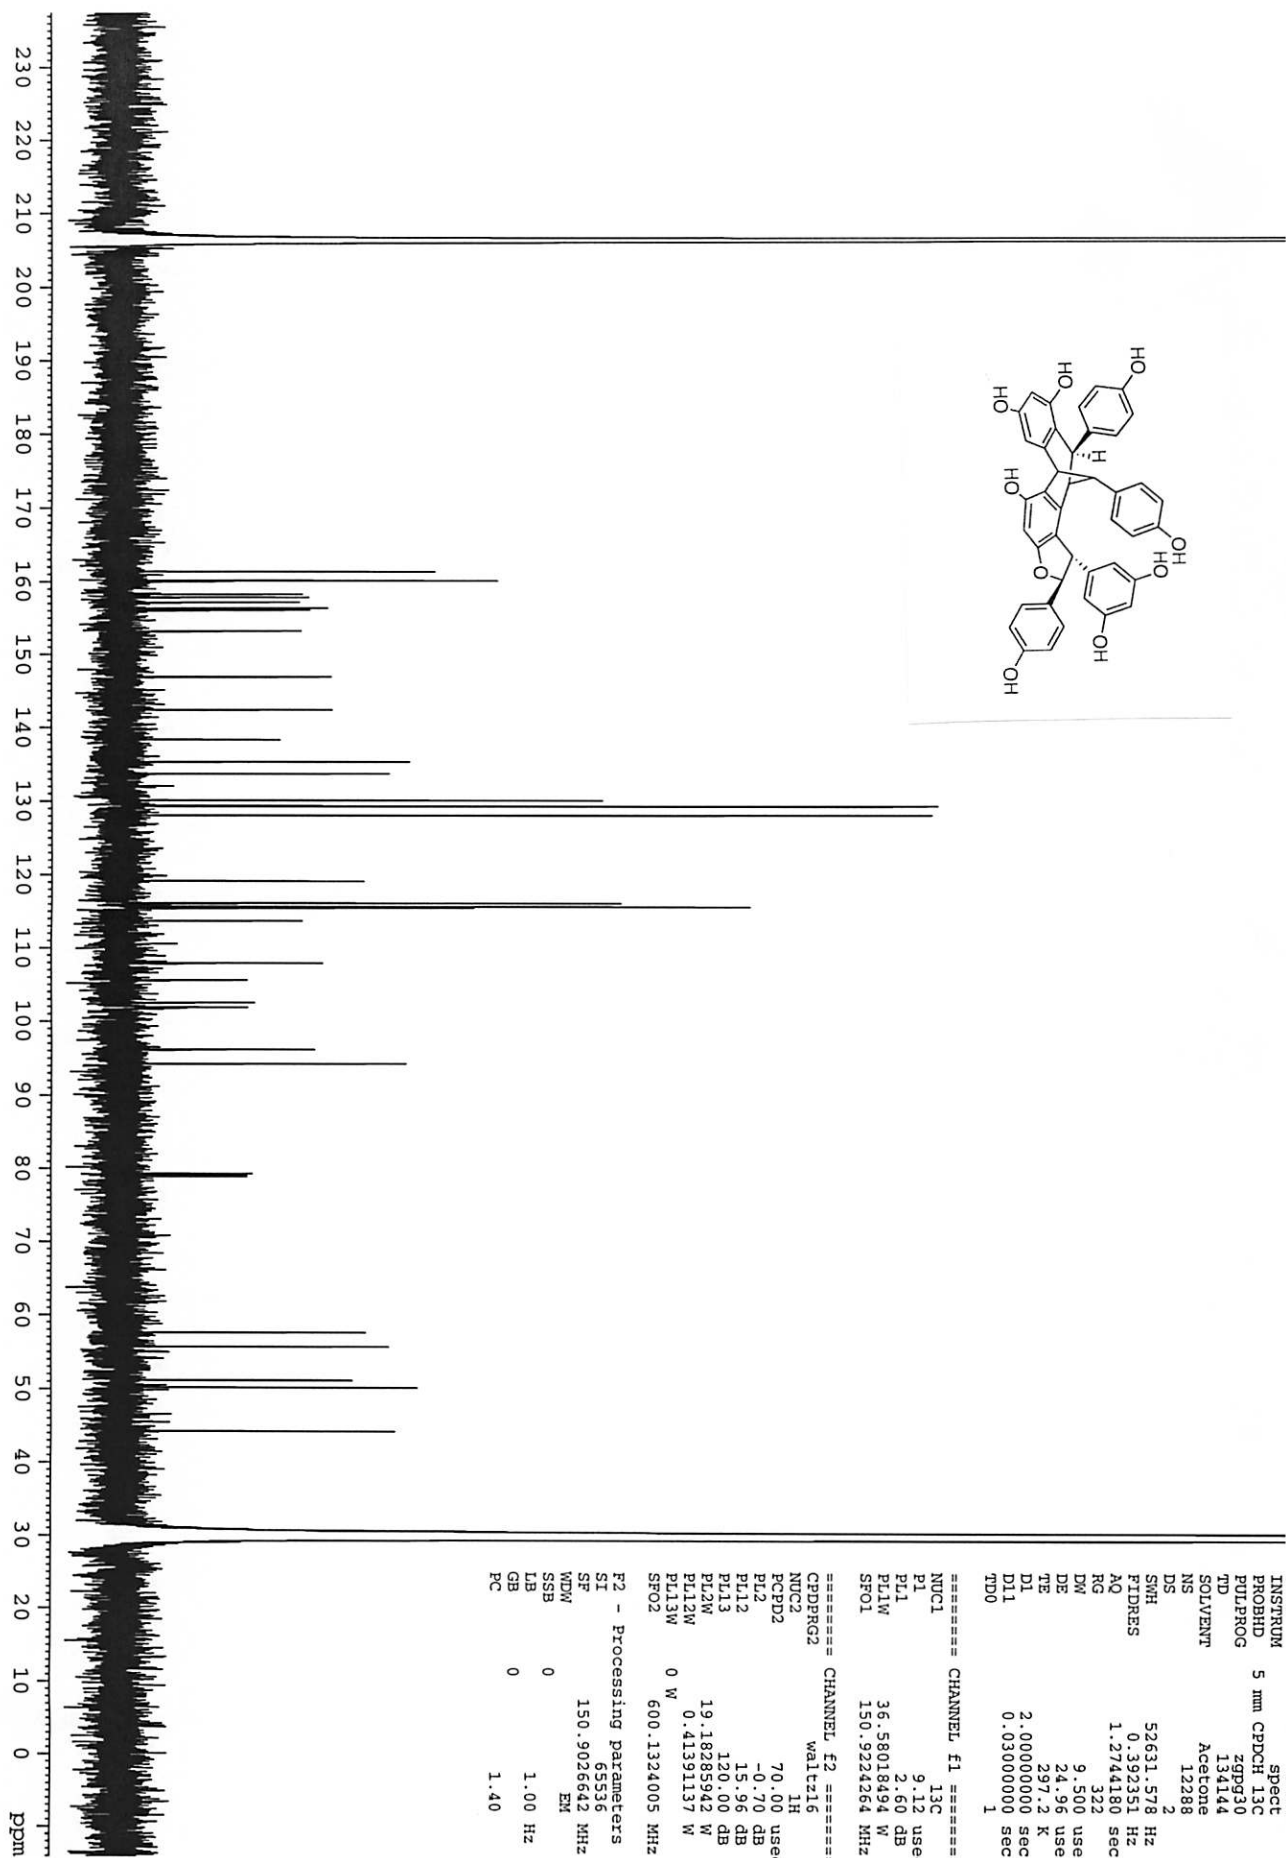

Current Data Parameters  
NAME Ampelopsin-G2  
EXPNO 11  
PROCNO 1

F2 - Acquisition Parameters  
Date\_ 20110217  
Time 10.13  
INSTRUM spect  
PROBHD 5 mm CPDCH 13C  
PULPROG zgpg30  
TD 134144  
SOLVENT Acetone  
NS 12288  
DS 2  
SWH 52631.578 Hz  
FIDRES 0.392351 Hz  
AQ 1.2744180 sec  
RG 322  
DW 9.500 usec  
DE 24.96 usec  
TE 297.2 K  
D1 2.00000000 sec  
D11 0.03000000 sec  
TDO 1

===== CHANNEL f1 =====  
NUC1 13C  
P1 9.12 usec  
PL1 2.60 dB  
PL1W 36.58018494 W  
SFO1 150.9224264 MHz

===== CHANNEL f2 =====  
CPDPRG2 waltz16  
NUC2 1H  
PCPD2 70.00 usec  
PL2 -0.70 dB  
PL12 15.96 dB  
PL13 120.00 dB  
PL2W 19.18285942 W  
PL12W 0.41391137 W  
PL13W 0 W  
SFO2 600.1324005 MHz

F2 - Processing parameters  
SI 65536  
SF 150.9026642 MHz  
WDW EM  
SSB 0  
LB 1.00 Hz  
GB 0  
PC 1.40

7.260  
7.070  
7.036  
7.015  
6.920  
6.915  
6.775  
6.753  
6.744  
6.722  
6.681  
6.676  
6.670  
6.647  
6.641  
6.636  
6.580  
6.558  
6.299  
6.011

4.516  
4.490

3.825  
3.752  
3.745  
3.732  
3.642  
3.565  
3.500  
3.426  
3.068

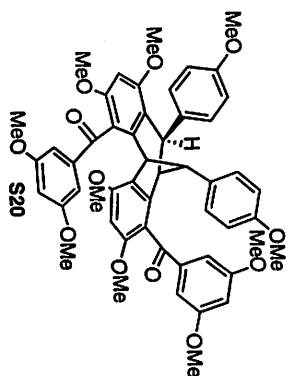

```

NAME          angc234
EXPNO         1
PROCNO        1
Date_         20100910
Time          16.35
INSTRUM       spect
PROBHD        5 mm BBI 1H/D-
PULPROG       zg30
TD            32768
SOLVENT       CDCl3
NS            27
DS            0
SWH           6009.615 Hz
FIDRES        0.183399 Hz
AQ            2.7263477 sec
RG            28.5
DW            83.200 usec
DE            6.50 usec
TE            422.7 K
D1            1.00000000 sec
TD0           1

===== CHANNEL f1 =====
NUC1          1H
P1            7.25 usec
PL1           0.00 dB
PL1W          12.20776844 W
SFO1          399.9225995 MHz
SI            32768
SF            399.9200118 MHz
WDW           EM
SSB           0
LB            0.30 Hz
GB            0
PC            1.00
  
```

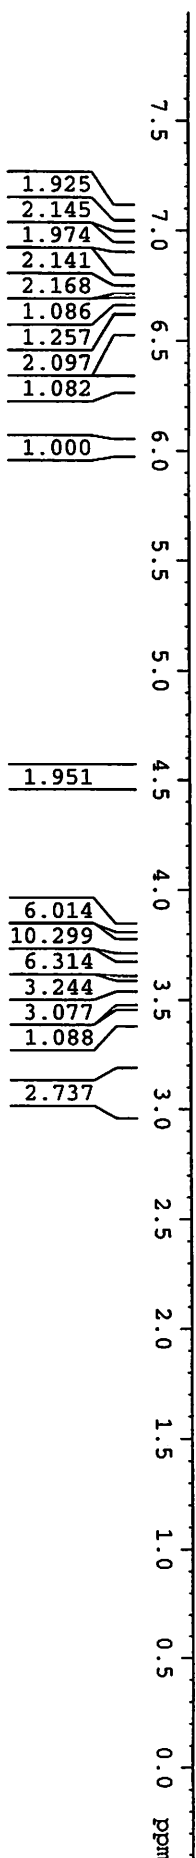

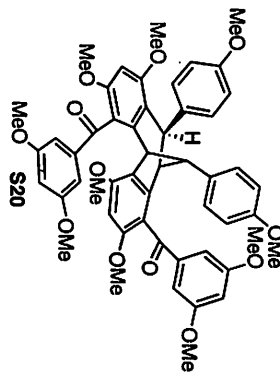

196.574  
196.213

160.747  
160.704  
160.597  
158.599  
157.637  
157.454  
157.403  
156.157  
145.822  
144.285  
141.766  
141.363  
139.058  
134.586  
129.098  
128.726  
128.575  
118.417  
118.068  
117.258  
113.311  
106.947  
105.537  
105.287  
93.850  
93.211

55.979  
55.786  
55.702  
55.644  
55.585  
55.353  
55.224  
55.119  
53.978  
53.859  
49.366  
45.317

```

NAME          ang214
EXPNO         2
PROCNO        1
F2          2010091
INSTRUM       spect
PROBHD        5 mm PABBO BBS-
PULPROG       zgpg30
TD            33650
SOLVENT       CDCl3
NS            499
DS            4
SWH           24038.465 Hz
FIDRES        0.714357 Hz
AQ            0.6999700 sec
RG            1820
DE            20.800 usec
TE            294.8 K
CNS12         145.0000000
CNS112        21.5000000 sec
D2            0.0000000 sec
D12           0.0344828 sec
TD0           0.00002000 sec
ZGPGFINS      1

===== CHANNEL f1 =====
NUC1          13C
P1            8.50 usec
PL1           200.00 dB
PL2           120.00 dB
PL3           3.20 dB
PL4           0.0000000 W
PL1W          49.5329468 W
SFO1          100.628298 MHz
SP2           11.07 dB
SP1W          Cpe60comp.4
SFO1W         0.500 Hz
SFOFFS2       0.00 Hz

===== CHANNEL f2 =====
CPDPRG2       waltz16
NUC2          1H
P2            14.10 usec
PL2           9.40 usec
PL3           18.80 usec
PL4           80.00 usec
PCPD2         0.0000000 W
PL12          14.50 dB
PL1W          26.94187927 W
PL13W         0.37190142 W
SFO2          400.116005 MHz
SF           32768 MHz
SI            100.6127626 MHz
WDW           EM
SSB           0 Hz
GB            1.00 Hz
PC            1.40
  
```

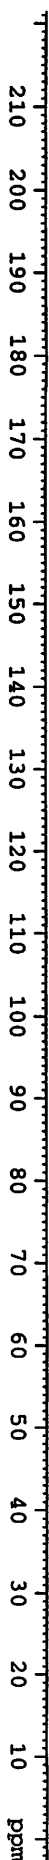

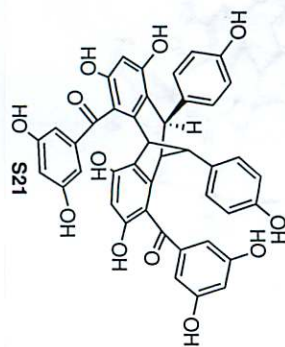

9.953  
9.456  
8.880  
8.607  
8.483  
8.416  
8.038  
7.977  
6.981  
6.964  
6.959  
6.775  
6.769  
6.710  
6.688  
6.636  
6.631  
6.625  
6.566  
6.561  
6.555  
6.548  
6.543  
6.531  
6.527  
6.352  
6.157  
4.366  
4.363  
4.204  
3.615  
3.521

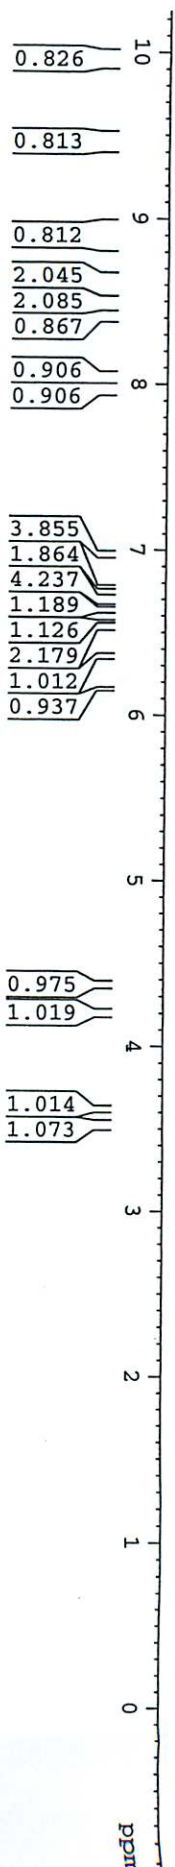

Current Data Parameters  
NAME ang0235  
EXPNO 3  
PROCNO 1

F2 - Acquisition Parameters  
Date\_ 20100922  
Time 14.34  
INSTRUM spect  
PROBHD 5 mm PABBO BB-  
PULPROG zg30  
TD 32768  
SOLVENT Acetone  
NS 32  
DS 0  
SWH 6009.615 Hz  
FIDRES 0.183399 Hz  
AQ 2.7263477 sec  
RG 456  
DW 83.200 usec  
DE 6.50 usec  
TE 298.2 K  
D1 1.00000000 sec  
TD0 1

===== CHANNEL f1 =====  
NUC1 1H  
P1 9.50 usec  
PL1 -4.00 dB  
PL1W 26.94187927 W  
SFO1 400.1328009 MHz

F2 - Processing parameters  
SI 32768  
SF 400.1300105 MHz  
WDW EM  
SSB 0  
LB 0.20 Hz  
GB 0  
PC 1.00

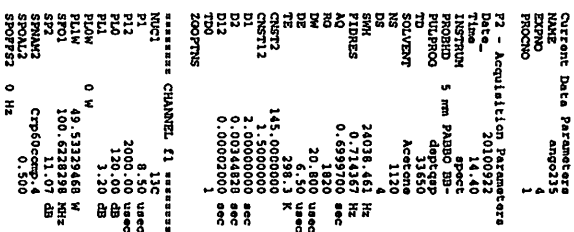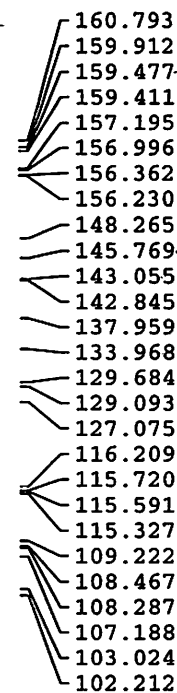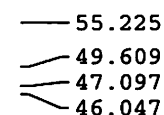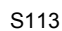

7.430  
7.412  
7.369  
7.351  
7.347  
7.327  
7.309  
7.297  
7.292  
7.279  
7.274  
7.266  
7.254  
7.247  
7.238  
7.234  
7.230  
7.184  
7.170  
7.160  
7.148  
7.127  
7.120  
7.107  
7.089  
7.073  
7.067  
7.024  
6.983  
6.966  
6.899  
6.893  
6.867  
6.845  
6.819  
6.743  
6.726  
6.721  
6.721  
6.719  
6.714  
6.709  
6.686  
6.679  
6.670  
6.657  
6.344  
5.997  
4.999  
4.934  
4.905  
4.900  
4.856  
4.826  
4.803  
4.780  
4.751  
4.708  
4.681  
4.652  
4.633  
4.559  
**4.529**  
4.441  
4.412  
3.873  
3.567

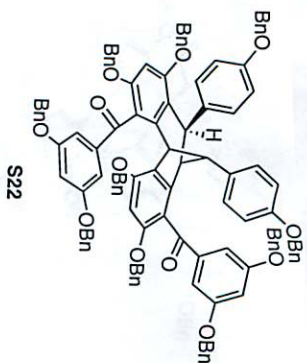

```

NAME          angco228B
EXPNO         1
PROCNO        1
Date_         20100923
Time          14.48
INSTRUM       5 mm PABBI 1H/
PROBHD        spect
PULPROG       zg30
TD            32768
SOLVENT       CDCl3
NS            57
DS            0
SWH           6009.615 Hz
FIDRES       0.183399 Hz
AQ           2.7263477 sec
RG           45.2
DW           83.200 usec
DE           6.50 usec
TE           295.0 K
D1           1.0000000 sec
TD0          1

===== CHANNEL f1 =====
NUC1          1H
P1           7.25 usec
PL1          0.00 dB
PL1W         12.20776844 W
SFO1         399.9225995 MHz
SI           32768
SF           399.9200241 MHz
WDW          EM
SSB          0
LB           0.30 Hz
GB           0
PC           1.00
  
```

2.258  
19.313  
8.470  
16.406  
4.266  
2.288  
6.499  
2.108  
1.184  
5.122  
1.094  
0.970

2.164  
9.240  
2.987  
1.912  
4.386  
1.074  
1.037  
1.050  
0.999

12  
11  
10  
9  
8  
7  
6  
5  
4  
3  
2  
1  
ppm

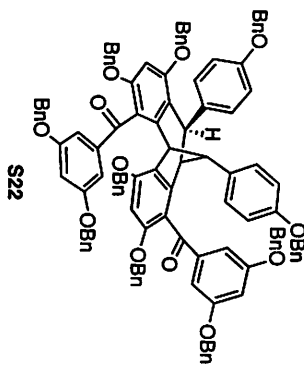

196.484  
196.267  
159.871  
159.524  
159.395  
157.638  
157.013  
156.914  
156.318  
155.038  
146.749  
144.382  
142.291  
142.162  
139.557  
137.373  
137.087  
136.731  
136.584  
136.513  
136.437  
136.304  
134.805  
130.339  
128.994  
128.566  
128.541  
128.522  
128.473  
128.433  
128.199  
128.186  
128.142  
128.128  
127.981  
127.946  
127.788  
127.761  
127.568  
127.494  
127.465  
127.356  
127.280  
126.935  
126.888  
126.676  
126.415  
119.264  
118.923  
117.724  
114.476  
114.262  
107.492  
106.874  
106.681  
96.683  
96.338  
68.991  
54.022  
49.652  
45.588  
44.779

200  
190  
180  
170  
160  
150  
140  
130  
120  
110  
100  
90  
80  
70  
60  
50  
ppm

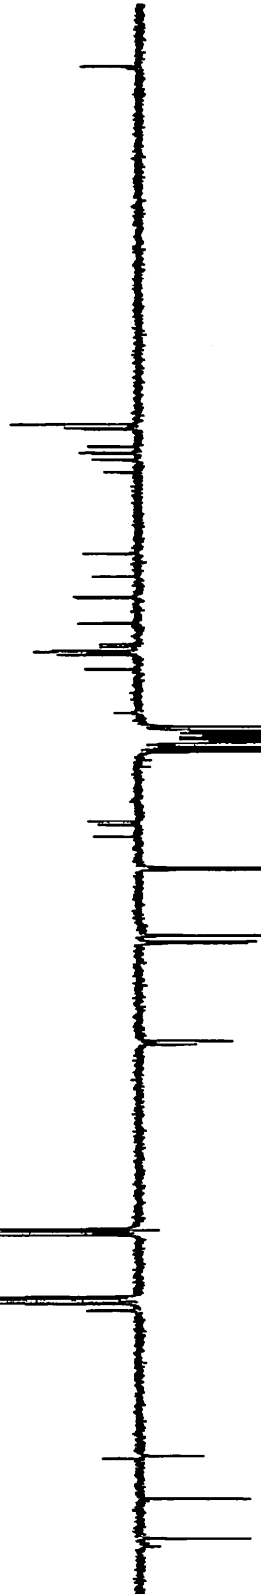

Current Data Parameters  
NAME: S22  
EXPNO: 1  
PROCNO: 1  
F2 - Acquisition Parameters  
Date\_: 20100923  
Time: 16.15  
INSTRUM: spect  
PROBHD: 5 mm PABO BB-  
PULPROG: zgpg30  
TD: 32768  
SOLVENT: CDCl3  
NS: 2744  
DS: 4  
SWH: 24038.461 Hz  
FIDRES: 0.714367 Hz  
AQ: 0.6993700 sec  
RG: 1820  
DW: 20.800 usec  
DE: 6.50 usec  
TE: 298.2 K  
CNS12: 145.0000000  
D1: 1.5000000 sec  
D2: 2.0000000 sec  
D3: 0.0040000 sec  
D4: 0.0040000 sec  
D5: 0.0002000 sec  
ZCOPTNS: 1  
\*\*\*\*\* CHANNEL f1 \*\*\*\*\*  
NUC1: 13C  
P1: 8.50 usec  
PL1: 2000.00 dB  
PL0: 120.00 dB  
PL1: 3.20 dB  
P10W: 0 W  
PL1W: 49.53129468 W  
SFO1: 100.6228295 MHz  
SFO2: 11.07 dB  
SFOAL2: CTP600  
SFOF2: 0.500  
\*\*\*\*\* CHANNEL f2 \*\*\*\*\*  
CPDPRG2: waltz16  
NUC2: 1H  
P2: 14.10 usec  
P3: 9.40 usec  
P4: 18.80 usec  
PCPD2: 80.00 usec  
PL2: 14.00 dB  
PL12: 14.50 dB  
PL2W: 26.94187927 W  
PL12W: 0.37190142 W  
SFO2: 400.1316005 MHz  
F2 - Processing parameters  
SI: 32768  
SF: 100.6127735 MHz  
WDW: EM  
SSB: 0  
CB: 1.00 Hz  
PC: 1.40

9.962  
 9.960  
 9.514  
 7.409  
 7.404  
 7.387  
 7.367  
 7.365  
 7.347  
 7.343  
 7.336  
 7.327  
 7.317  
 7.306  
 7.302  
 7.295  
 7.289  
 7.284  
 7.275  
 7.243  
 7.233  
 7.207  
 7.202  
 7.189  
 7.163  
 7.144  
 7.127  
 7.068  
 7.046  
 6.874  
 6.853  
 6.686  
 6.668  
 6.565  
 6.559  
 6.554  
 6.523  
 6.518  
 6.481  
 6.459  
 6.424  
 6.420  
 6.376  
 6.371  
 6.355  
 5.391  
 4.979  
 4.962  
 4.952  
 4.940  
 4.928  
 4.922  
 4.910  
 4.901  
 4.889  
 4.880  
 4.857  
 4.844  
 4.815  
 4.725  
 4.695  
 4.674  
 4.665  
 4.614  
 4.416  
 4.391  
 3.527  
 3.506

NAME ang0268  
 EXPNO 4  
 PROCNO 1  
 Date\_ 20101028  
 Time 13.05  
 INSTRUM spect  
 PROBD 5 mm PABBI 1H/  
 PULPROG zg30  
 TD 32768  
 SOLVENT CDCl3  
 NS 36  
 DS 0  
 SWH 6009.615 Hz  
 FIDRES 0.183399 Hz  
 AQ 2.7263477 sec  
 RG 101  
 DW 83.200 usec  
 DE 6.50 usec  
 TE 295.1 K  
 D1 1.00000000 sec  
 TD0 1  
 ===== CHANNEL f1 =====  
 NUC1 1H  
 P1 7.25 usec  
 PL1 0.00 dB  
 PL1W 12.20776844 W  
 SFO1 399.9225995 MHz  
 SI 32768  
 SF 399.9200125 MHz  
 WDW EM  
 SSB 0  
 LB 0.30 Hz  
 GB 0  
 PC 1.00

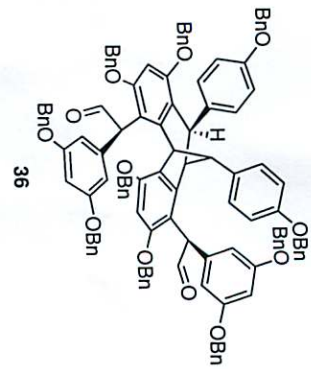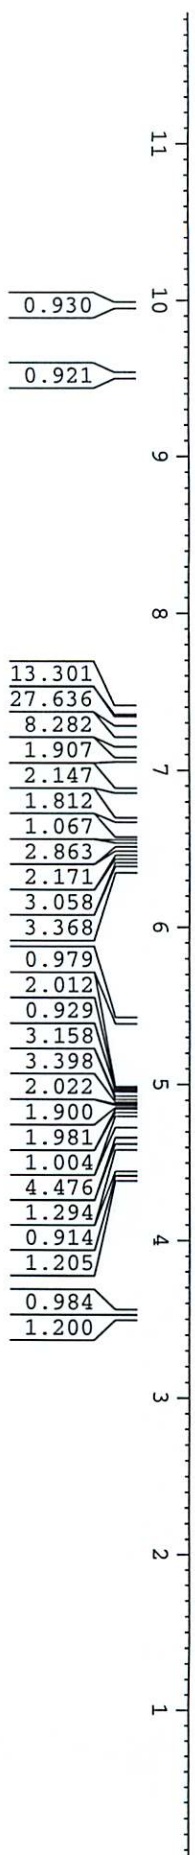

230 220 210 200 190 180 170 160 150 140 130 120 110 100 90 80 70 60 50 40 30 20 10 ppm

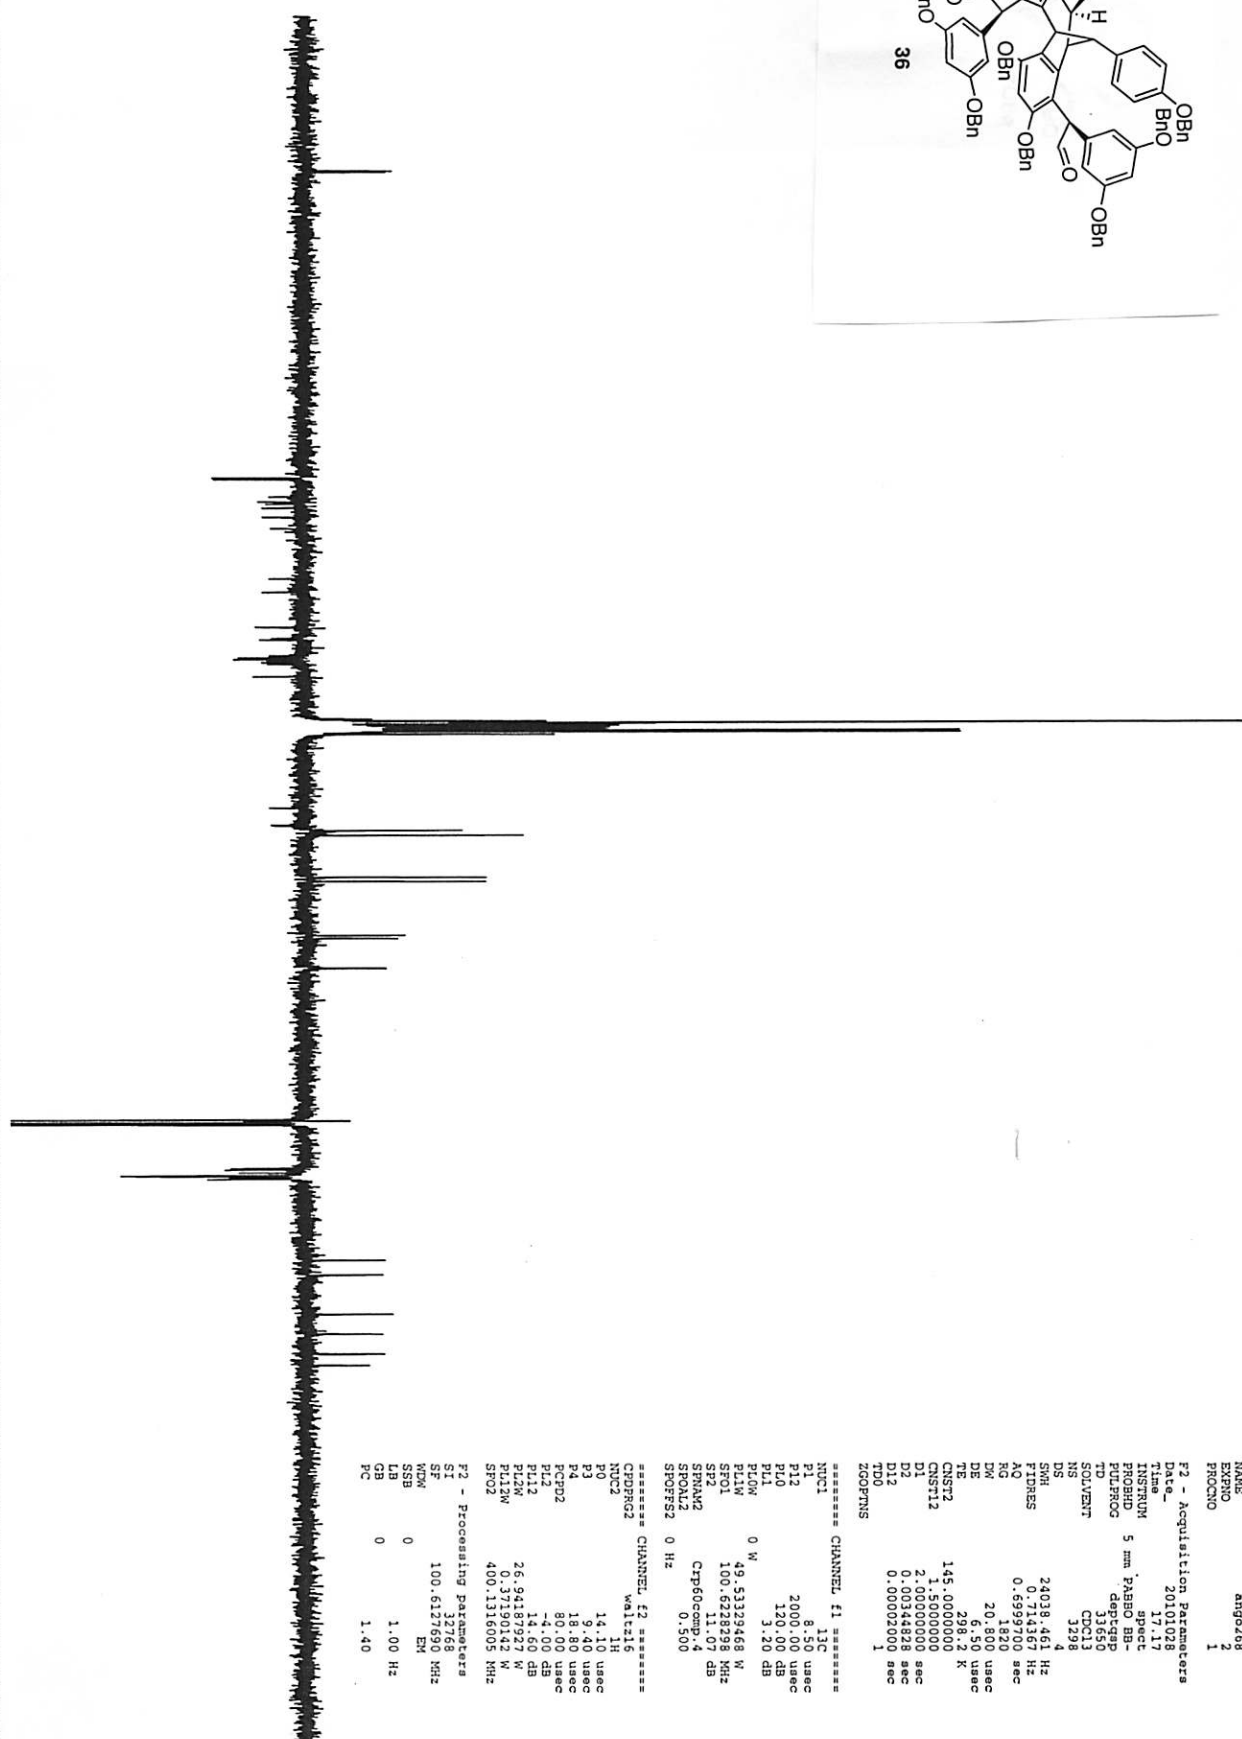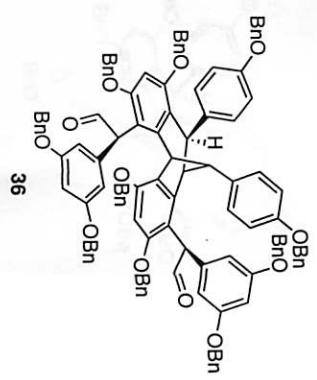

|         |         |         |         |         |         |         |         |         |         |         |         |         |         |         |         |         |         |         |         |         |         |         |         |         |         |         |         |         |         |         |         |         |         |         |         |         |         |         |         |         |         |         |         |         |         |         |         |         |         |         |         |         |         |        |        |        |        |        |        |        |        |        |        |        |        |        |        |        |        |
|---------|---------|---------|---------|---------|---------|---------|---------|---------|---------|---------|---------|---------|---------|---------|---------|---------|---------|---------|---------|---------|---------|---------|---------|---------|---------|---------|---------|---------|---------|---------|---------|---------|---------|---------|---------|---------|---------|---------|---------|---------|---------|---------|---------|---------|---------|---------|---------|---------|---------|---------|---------|---------|---------|--------|--------|--------|--------|--------|--------|--------|--------|--------|--------|--------|--------|--------|--------|--------|--------|
| 199.678 | 199.482 | 160.226 | 160.053 | 157.802 | 157.159 | 156.838 | 156.355 | 155.144 | 153.685 | 147.218 | 145.487 | 140.911 | 139.527 | 139.304 | 137.269 | 137.065 | 136.964 | 136.717 | 136.601 | 136.363 | 136.306 | 136.117 | 134.506 | 129.046 | 128.811 | 128.595 | 128.571 | 128.527 | 128.430 | 128.204 | 128.159 | 127.993 | 127.960 | 127.933 | 127.867 | 127.790 | 127.660 | 127.618 | 127.502 | 127.429 | 127.382 | 127.053 | 117.641 | 115.404 | 115.313 | 114.714 | 114.702 | 114.117 | 114.100 | 108.624 | 108.086 | 101.095 | 100.704 | 96.881 | 96.819 | 71.025 | 70.822 | 70.439 | 70.090 | 70.047 | 69.963 | 69.717 | 69.582 | 59.080 | 57.191 | 52.137 | 49.588 | 47.009 | 45.565 |
|---------|---------|---------|---------|---------|---------|---------|---------|---------|---------|---------|---------|---------|---------|---------|---------|---------|---------|---------|---------|---------|---------|---------|---------|---------|---------|---------|---------|---------|---------|---------|---------|---------|---------|---------|---------|---------|---------|---------|---------|---------|---------|---------|---------|---------|---------|---------|---------|---------|---------|---------|---------|---------|---------|--------|--------|--------|--------|--------|--------|--------|--------|--------|--------|--------|--------|--------|--------|--------|--------|

Current Data Parameters  
NAME: angol268  
EXPNO: 2  
PROCNO: 1  
F2 - Acquisition Parameters  
Date\_ Time: 20101028 17.17  
INSTRUM: spect  
PROBHD: 5 mm PABBO BB-  
PULPROG: zgpg30  
TD: 31650  
SOLVENT: CDCl3  
DS: 4  
SWH: 24039.461 Hz  
FIDRES: 0.714367 Hz  
AQ: 0.6999700 sec  
RG: 1820  
DM: 20.800 usec  
DE: 1.500 usec  
TE: 298.2 K  
CNST2: 1.5000000  
D1: 2.0000000 sec  
D2: 0.00344828 sec  
D12: 0.0002000 sec  
TD0: 1  
ZOOPTNS  
===== CHANNEL f1 =====  
NUC1: 13C  
P1: 8.50 usec  
PL1: 2000.00 usec  
PL2: 120.00 dB  
PL3: 3.20 dB  
PL4: 0 W  
PL5: 49.5332468 W  
PL6: 100.6282928 W  
SP1: 11.07 dB  
SP2: Cpf0comp.4  
SFOAL2: 0.500  
SFOFS2: 0 Hz  
===== CHANNEL f2 =====  
CPDPRG2: waltz16  
NUC2: 1H  
P2: 14.10 usec  
PL2: 9.40 usec  
PL3: 18.80 usec  
PL4: 80.00 usec  
PL5: 14.00 dB  
PL6: 26.9418727 W  
PL7W: 0.37190142 W  
SFO2: 400.1316005 MHz  
F2 - Processing parameters  
SI: 32768  
WDW: EM  
SSB: 0  
LB: 1.00 Hz  
GB: 0  
PC: 1.40

9.894  
9.892  
9.592  
7.395  
7.391  
7.374  
7.360  
7.343  
7.332  
7.324  
7.320  
7.302  
7.288  
7.249  
7.239  
7.232  
7.136  
7.118  
7.108  
7.094  
7.090  
7.084  
7.075  
7.058  
6.826  
6.804  
6.747  
6.726  
6.699  
6.675  
6.671  
6.580  
6.562  
6.542  
6.537  
6.532  
6.433  
6.428  
6.402  
6.396  
6.344  
6.338  
6.332  
6.324  
5.449  
4.998  
4.982  
4.955  
4.931  
4.917  
4.901  
4.877  
4.862  
4.850  
4.835  
4.826  
4.806  
4.797  
4.776  
4.726  
4.696  
4.671  
4.642  
4.545  
4.515  
4.472  
4.436  
4.407  
3.965  
3.567  
3.530

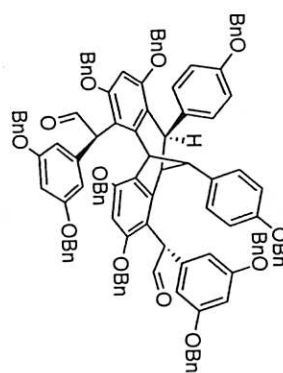

NAME ang0286  
EXPNO 1  
PROCNO 1  
Date\_ 20101201  
Time 9.35  
INSTRUM spect  
PROBHD 5 mm PABBI 1H/  
PULPROG zg30  
TD 32768  
SOLVENT CDC13  
NS 29  
DS 0  
SWH 6009.615 Hz  
FIDRES 0.183399 Hz  
AQ 2.7263477 sec  
RG 203  
DW 83.200 usec  
DE 6.50 usec  
TE 298.5 K  
D1 1.0000000 sec  
TD0 1

===== CHANNEL f1 =====  
NUC1 1H  
P1 7.25 usec  
PL1 0.00 dB  
PL1W 12.20776844 W  
SFO1 399.9225995 MHz  
SI 32768  
SF 399.9200115 MHz  
WDW EM  
SSB 0  
LB 0.30 Hz  
GB 0  
PC 1.00

12  
11  
10  
9  
8  
7  
6  
5  
4  
3  
2  
1  
P

0.988  
1.008

33.156  
10.349  
5.088  
1.980  
2.094  
4.198  
1.102  
0.977  
1.125  
2.116  
2.041  
2.923  
1.040  
1.265  
2.269  
3.383  
6.961  
3.478  
2.253  
1.193  
1.180  
1.062  
1.161  
1.147  
1.051  
1.103

200.107  
199.935  
160.209  
160.048  
157.605  
157.024  
156.929  
156.666  
155.028  
153.588  
146.576  
145.673  
140.843  
139.404  
137.251  
137.163  
137.066  
136.949  
136.573  
136.352  
136.331  
136.258  
135.255  
134.983  
129.167  
128.813  
128.696  
128.558  
128.528  
128.500  
128.449  
128.193  
128.049  
127.989  
127.932  
127.823  
127.787  
127.673  
127.406  
127.376  
127.347  
127.325  
127.284  
126.647  
117.814  
115.554  
115.472  
114.466  
114.442  
108.512  
107.888  
101.160  
100.750  
97.189  
96.942  
71.061  
70.743  
70.591  
70.060  
69.990  
69.921  
69.791  
69.493  
58.206  
56.953  
53.487  
49.289  
46.523  
44.977

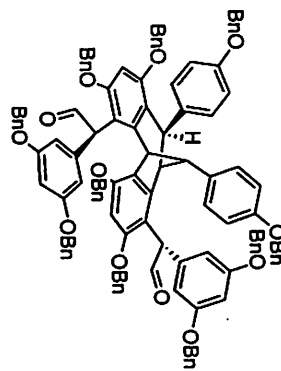

230 220 210 200 190 180 170 160 150 140 130 120 110 100 90 80 70 60 50 40 30 20 10 ppm

Current Data Parameters  
NAME emp285  
EXPNO 5  
PROCNO 1  
F2 - Acquisition Parameters  
Date\_ 2010101  
Time 16.17  
INSTRUM spect  
PROBHD 5 mm BBOBO  
PULPROG zgpg30  
PCPDPRG2 depulprg  
CMA10  
SOLVENT CHL3  
NS 11614  
DS 4  
SWH 24018.461 Hz  
FIDRES 0.714567 Hz  
AQ 0.699700 sec  
RG 2.820  
WDW 18.000000  
SSB 0  
LB 2.820  
GB 0  
PC 1.00 Hz  
F2 - Processing parameters  
SI 32768  
SF 100.612189 MHz  
WDW EM  
SSB 0  
LB 0  
GB 0  
PC 1.40

\*\*\*\*\* CHANNEL f1 \*\*\*\*\*  
NUC1 13C  
P1 8.50 usec  
PL1 0.00 dB  
PCP1 0.00 dB  
F1 1.20 dB  
F2 0 W  
PCF2 0.00 dB  
PL2 0.00 dB  
PCP2 0.00 dB  
F2 11.07 dB  
SFO2 100.625258 MHz  
SFO1 11.07 dB  
SFO2 0 Hz  
SFO1 0.500

\*\*\*\*\* CHANNEL f2 \*\*\*\*\*  
NUC2 1H  
P2 14.10 usec  
PL2 0.00 dB  
PCP2 0.00 dB  
F2 1.00 dB  
PCF2 0.00 dB  
PL2 0.00 dB  
PCP2 0.00 dB  
F2 1.00 dB  
SFO2 400.115605 MHz  
SFO1 400.115605 MHz  
SFO2 0 Hz  
SFO1 0.500

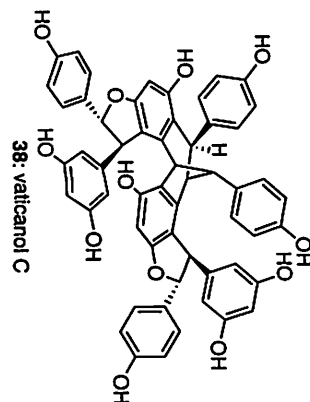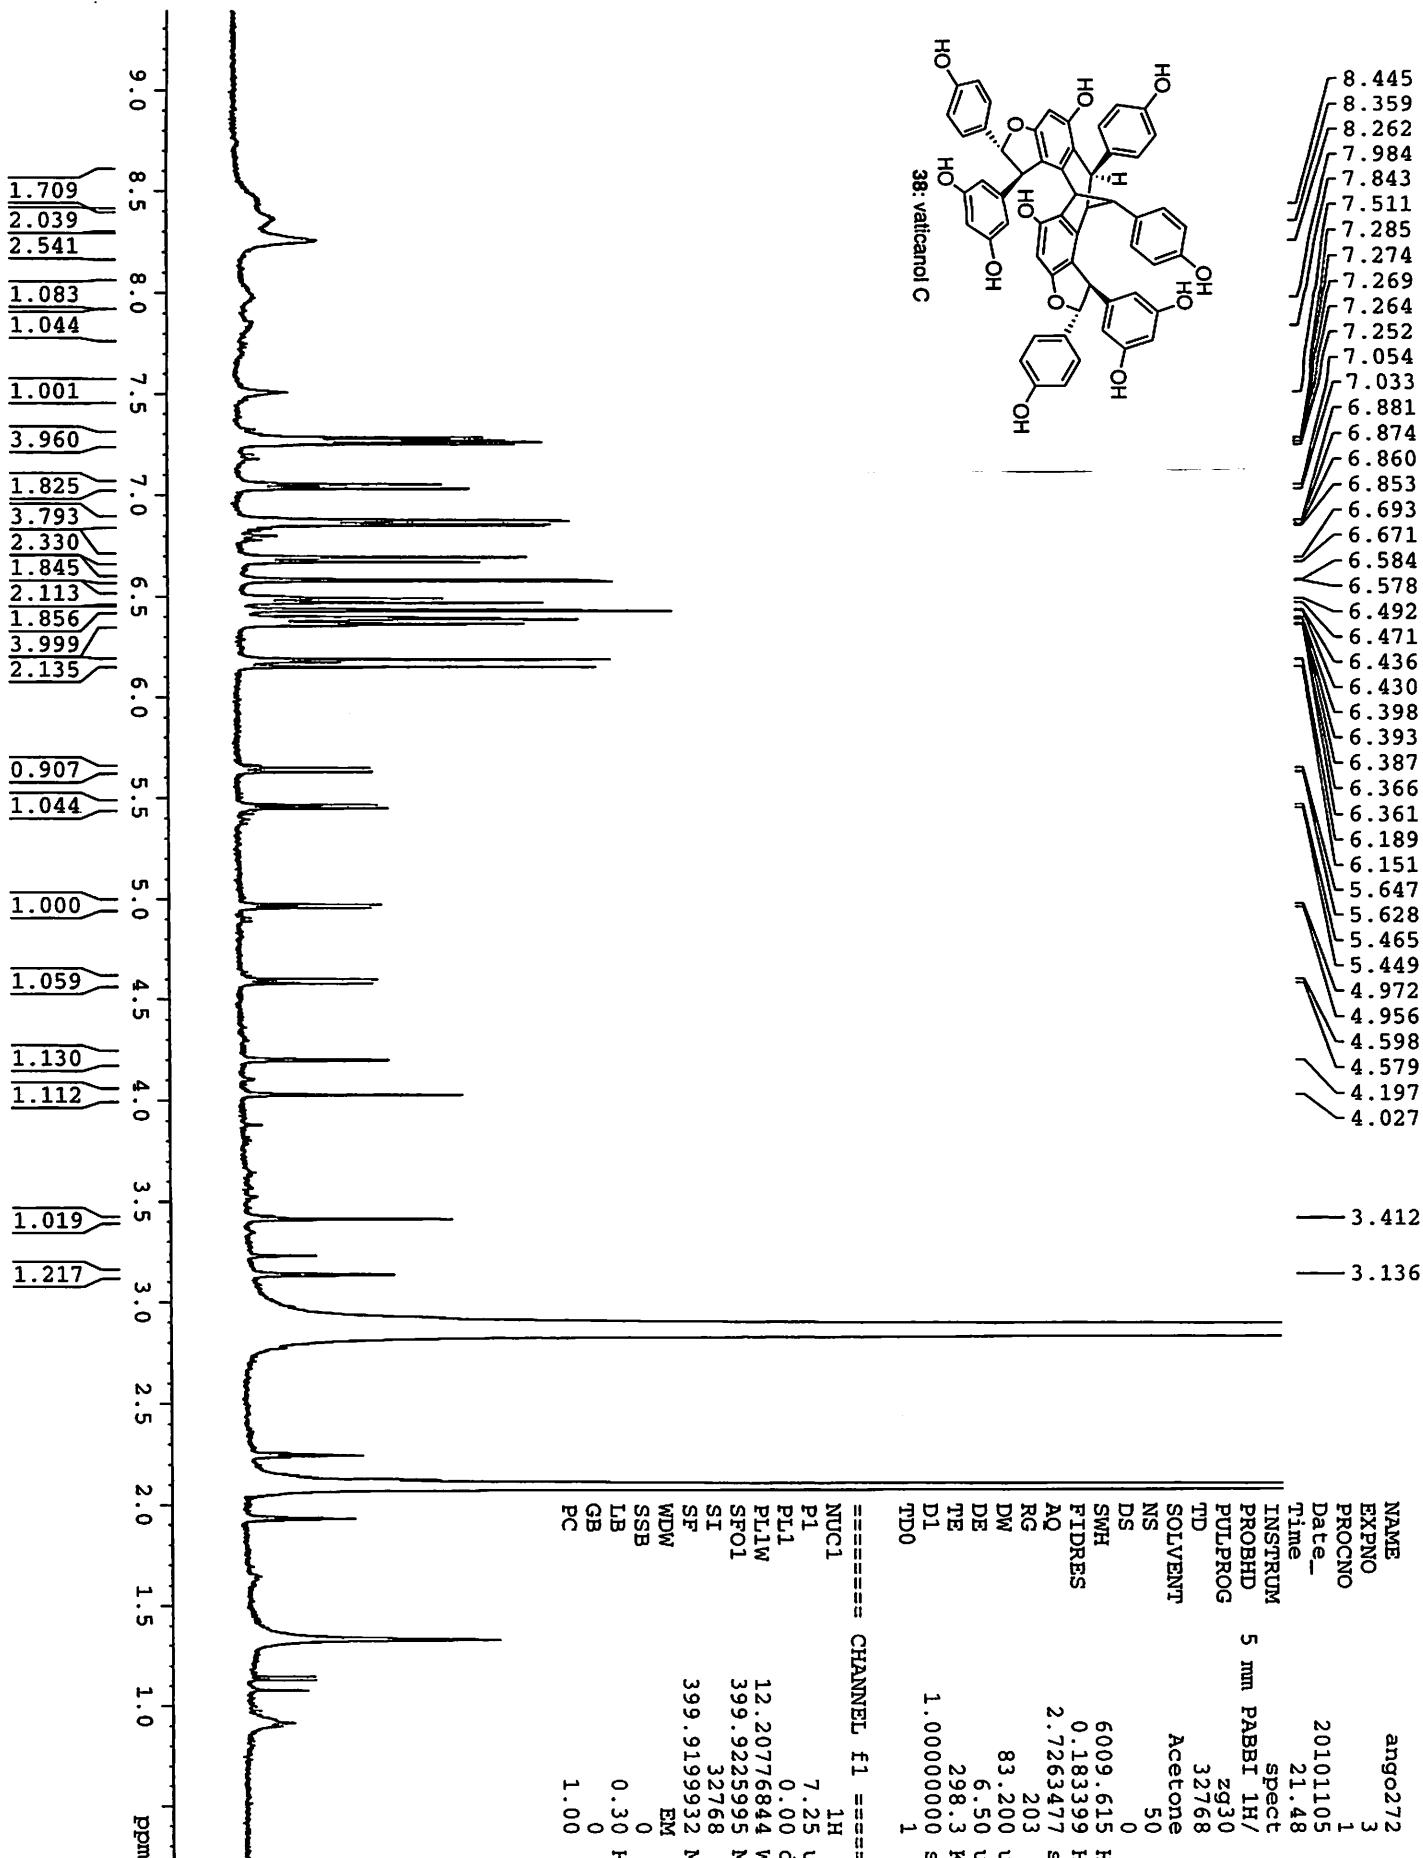

161.100  
160.094  
159.999  
159.905  
158.321  
157.932  
156.171  
155.939  
153.566  
148.486  
146.060  
144.196  
143.318  
138.437  
134.340  
134.298  
133.569  
130.068  
129.579  
128.702  
128.401  
128.242  
118.667  
117.947  
116.235  
116.187  
115.676  
115.566  
114.781  
108.212  
107.556  
102.510  
102.013  
96.044  
95.915  
94.300

57.870  
56.944  
51.149  
49.769  
47.701  
45.692

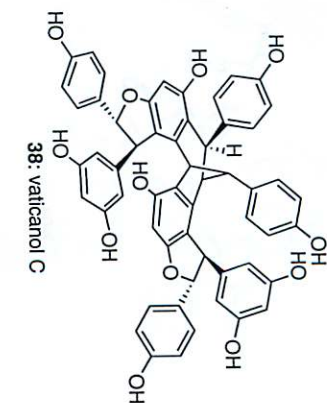

Current Data Parameters  
NAME Vaticanol C  
EXPNO 12  
PROCNO 1

F2 - Acquisition Parameters  
Date\_ 20101216  
Time 10:14  
INSTRUM spect  
PROBHD 5 mm CPDCH 13C  
PULPROG zgpg30  
TD 134144  
SOLVENT Acetone  
NS 10240  
DS 2  
SWH 39062.500 Hz  
FIDRES 0.251198 Hz  
AQ 1.7170912 sec  
RG 322  
RW 12.600 usec  
DM 367.9 K  
TE 297.2 K  
D1 2.0000000 sec  
D11 0.0300000 sec  
TD0 1

===== CHANNEL f1 =====  
NUC1 13C  
P1 9.13 usec  
PL1 36.58018494 W  
SFO1 150.9209173 MHz

===== CHANNEL f2 =====  
CPDPRG2 waltz16  
NUC2 1H  
PCPD2 70.00 usec  
PL2 -0.70 dB  
PL12 15.37 dB  
PL13 120.00 dB  
PL2W 19.18285942 W  
PL1W 0.47414738 W  
SFO2 600.1324005 MHz

F2 - Processing parameters  
SI 65536  
SF 150.9026553 MHz  
WDW EM  
SSB 0  
LB 1.00 Hz  
GB 0  
PC 1.20

200 190 180 170 160 150 140 130 120 110 100 90 80 70 60 50 40 ppm

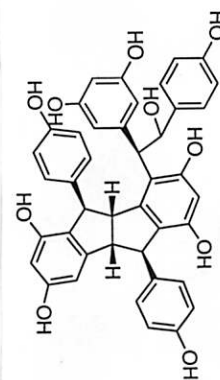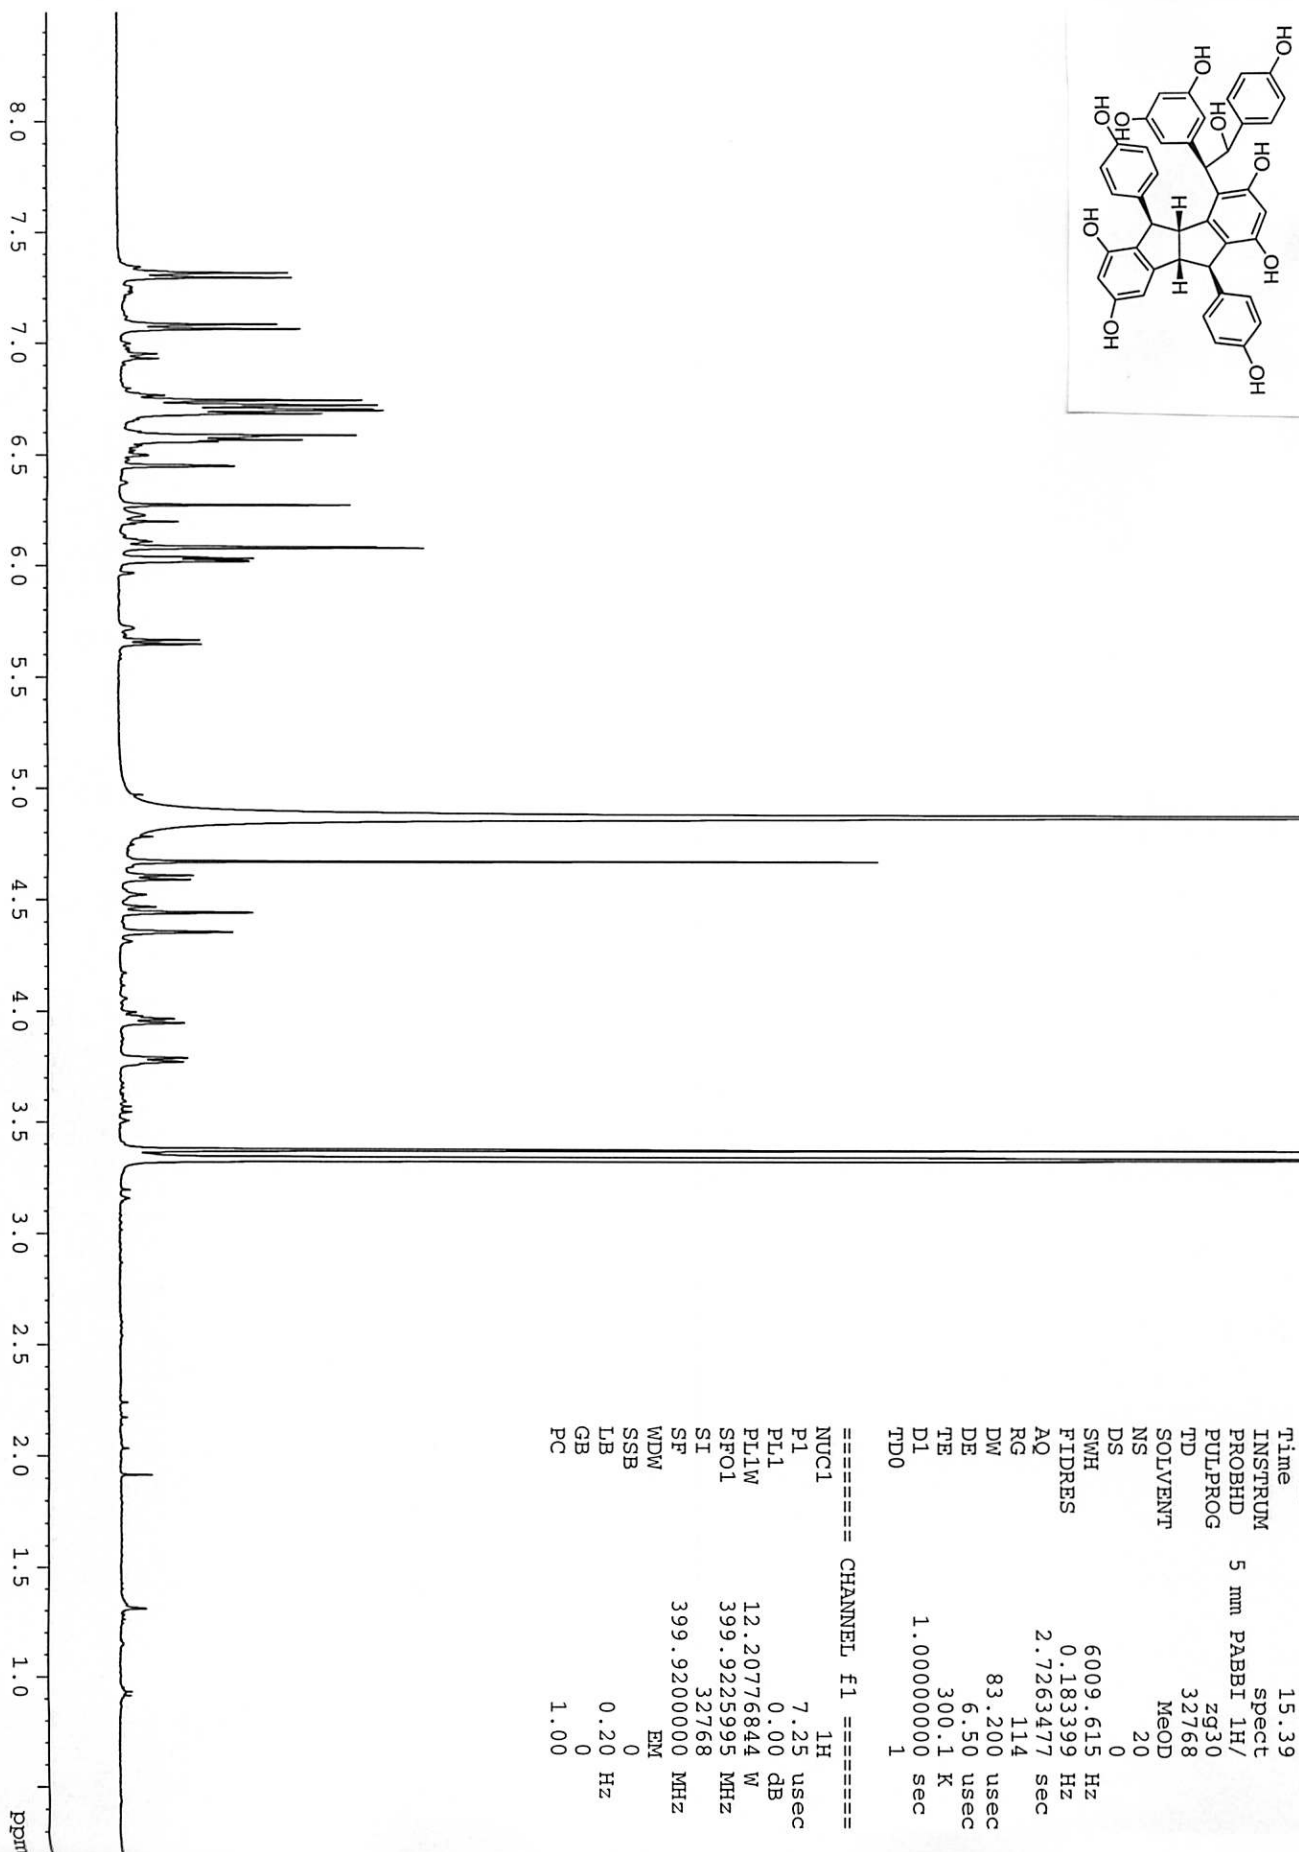

```

NAME          ango360C
EXPNO         1
PROCNO        1
Date_         20110506
Time          15.39
INSTRUM       spect
PROBHD        5 mm PABBI 1H/
PULPROG       zg30
TD            32768
SOLVENT       MeOD
NS            20
DS            0
SWH           6009.615 Hz
FIDRES       0.183399 Hz
AQ           2.7263477 sec
RG           114
DW           83.200 usec
DE           6.50 usec
TE           300.1 K
D1           1.00000000 sec
TD0          1

===== CHANNEL f1 =====
NUC1          1H
P1           7.25 usec
PL1          0.00 dB
PL1W         12.20776844 W
SFO1         399.9225995 MHz
SI           32768
SF           399.9200000 MHz
WDW          EM
SSB          0
LB           0.20 Hz
GB           0
PC           1.00
  
```

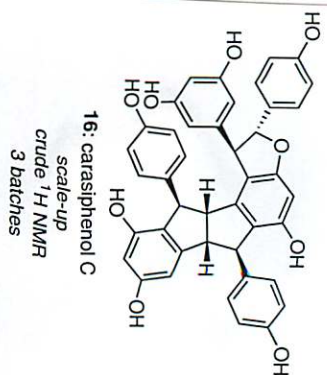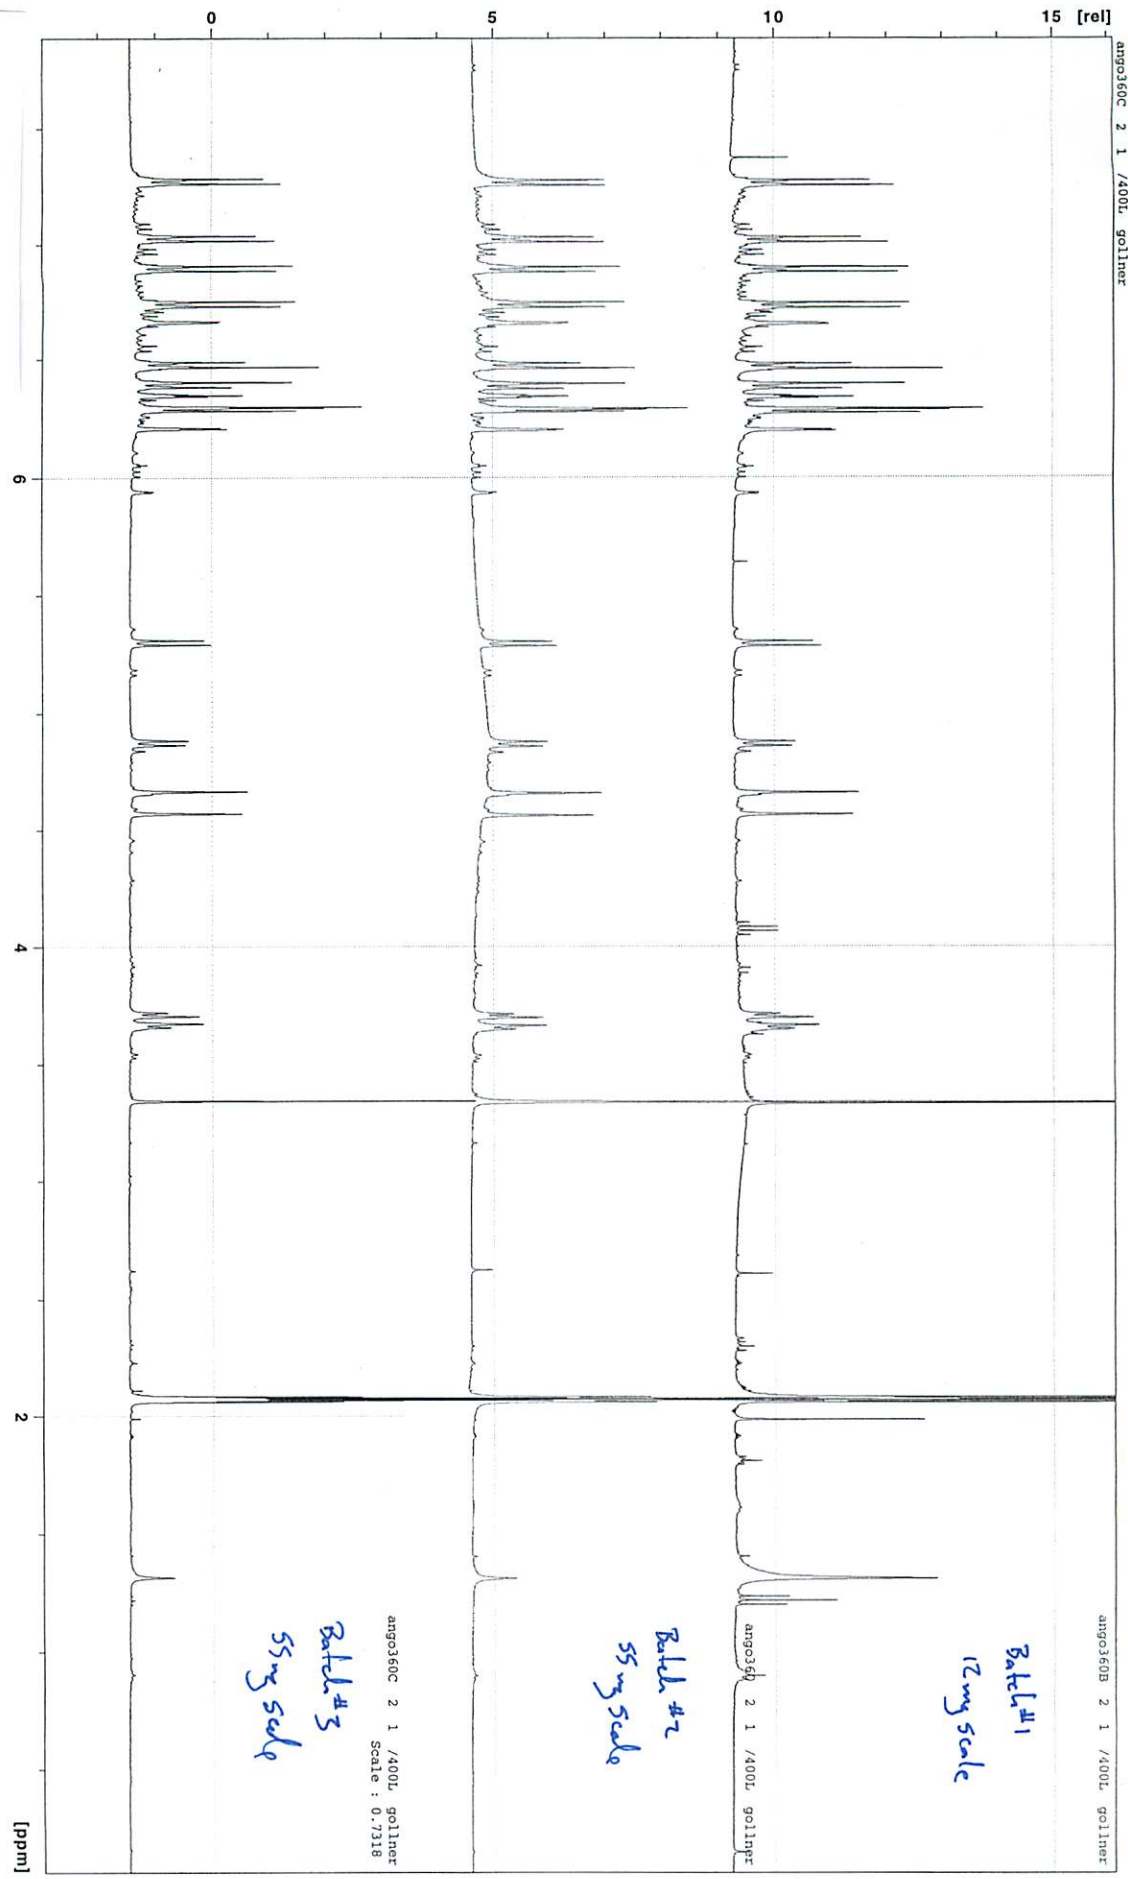

NAME ango360C  
 EXPNO 2  
 PROCNO 1  
 Date\_ 20110506  
 Time 18.22  
 INSTRUM spect  
 PROBHD 5 mm PABBI 1H/  
 PULPROG zg30  
 TD 32768  
 SOLVENT Acetone  
 NS 32  
 DS 0  
 SWH 6009.615 Hz  
 FIDRES 0.183399 Hz  
 AQ 2.7263477 sec  
 RG 36  
 DW 83.200 usec  
 DE 6.50 usec  
 TE 300.3 K  
 D1 1.0000000 sec  
 TD0 1

===== CHANNEL f1 =====  
 NUC1 1H  
 P1 7.25 usec  
 PL1 0.00 dB  
 PL1W 12.20776844 W  
 SF01 399.9225995 MHz  
 SI 32768  
 SF 399.9200000 MHz  
 WIDW EM  
 SSB 0  
 LB 0.20 Hz  
 GB 0  
 PC 1.00

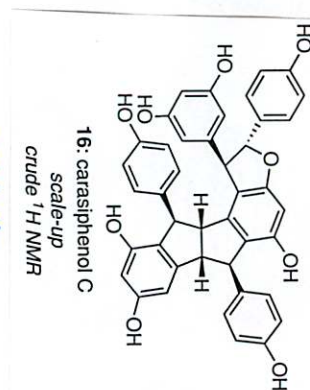

Batch #3

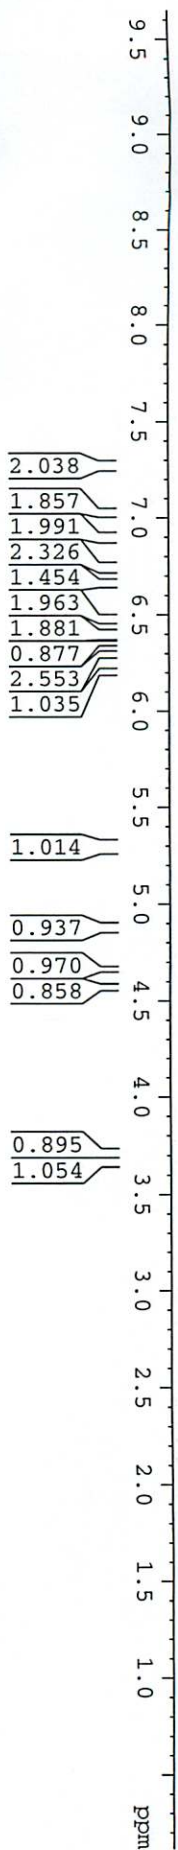

NAME ang0360  
 EXPNO 3  
 PROCNO 1  
 Date\_ 20110507  
 Time 15.18  
 INSTRUM spect  
 PROBD 5 mm PABBO BB-  
 PULPROG zgpg30  
 TD 32768  
 SOLVENT Acetone  
 NS 101  
 DS 0  
 SWH 24038.461 Hz  
 FIDRES 0.733596 Hz  
 AQ 0.6816244 sec  
 RG 1820  
 DW 20.800 usec  
 DE 6.50 usec  
 TE 298.3 K  
 D1 0.69999999 sec  
 D11 0.03000000 sec  
 TDO 1

===== CHANNEL f1 =====  
 NUCC1 13C  
 P1 8.50 usec  
 PL1 3.20 dB  
 PL1W 49.53329468 W  
 SFO1 100.6228298 MHz

===== CHANNEL f2 =====  
 CPDPRG2 waltz16  
 NUCC2 1H  
 PCPD2 80.00 usec  
 PL2 -4.00 dB  
 PL12 14.60 dB  
 PL13 14.60 dB  
 PL2W 26.94187927 W  
 PL12W 0.37190142 W  
 PL13W 0.37190142 W  
 SFO2 400.1316005 MHz  
 SI 32768  
 SF 100.6127690 MHz  
 WDW EM  
 SSB 0  
 LB 1.00 Hz  
 GB 0  
 PC 1.40

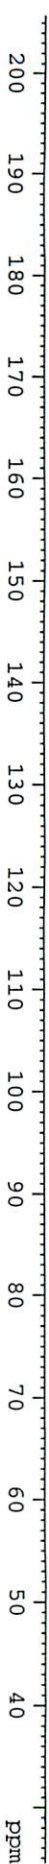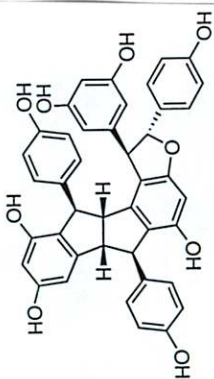

16: carasiphenol C  
 scale-up  
 crude <sup>13</sup>C NMR  
 100 scans  
 Batch 2+3
